# Supplementary material for: Global Proteomic Analysis of the Resuscitation State of Vibrio parahaemolyticus Compared With the Normal and Viable but Non-culturable State
Source: Front Microbiol. 2019 May 8;10:1045. doi: 10.3389/fmicb.2019.01045 (PMC6517545; doi:10.3389/fmicb.2019.01045)
Supplement: TABLE S2 — Detail information of the identified proteins. [file Table_2.xlsx]

## Sheet: Proteins
Checked	Protein FDR Confidence	Master	Accession	Description	Exp. q-value	Sum PEP Score	Coverage	# Peptides	# PSMs	# Unique Peptides	# Protein Groups	# AAs	MW [kDa]	calc. pI	Found in Sample: [S1] F1: 113, Control	Found in Sample: [S2] F1: 114, Sample	Found in Sample: [S3] F1: 115, Sample	Modifications	Abundance Ratio: (F1, 114) / (F1, 113)	Abundance Ratio: (F1, 115) / (F1, 113)	Abundances (Scaled): F1: 113, Control	Abundances (Scaled): F1: 114, Sample	Abundances (Scaled): F1: 115, Sample	Abundances Count: F1: 113, Control	Abundances Count: F1: 114, Sample	Abundances Count: F1: 115, Sample	emPAI	# Razor Peptides	Score Sequest HT	# Peptides Sequest HT
FALSE	High	Master Protein	A6B6T9	NAD-glutamate dehydrogenase OS=Vibrio parahaemolyticus serotype O3:K6 (strain AQ3810) GN=A79_3612 PE=4 SV=1	0	1406.47	66.088	98	671	98	1	1613	183.379	5.52	High	High	High		1.072	0.892	101.2	108.5	90.3	136	136	136	318.714	0	2432.42	98
FALSE	High	Master Protein	A6B5L1	DNA-directed RNA polymerase subunit beta' OS=Vibrio parahaemolyticus serotype O3:K6 (strain AQ3810) GN=rpoC PE=3 SV=1	0	1312.64	71.7143	81	579	81	1	1400	154.822	6.14	High	High	High		0.942	1.061	99.9	94.1	106	114	114	114	280.474	0	2339.6	81
FALSE	High	Master Protein	A6B838	Pyruvate dehydrogenase E1 component OS=Vibrio parahaemolyticus serotype O3:K6 (strain AQ3810) GN=aceE PE=4 SV=1	0	1244.71	72.717	67	874	67	1	887	99.601	5.34	High	High	High		1.391	1.185	83.9	116.7	99.4	117	117	117	5010.87	0	3169.15	67
FALSE	High	Master Protein	A6B256	Chaperone protein DnaK OS=Vibrio parahaemolyticus serotype O3:K6 (strain AQ3810) GN=dnaK PE=2 SV=1	0	1166.29	86.8132	57	624	57	1	637	69.012	4.81	High	High	High		0.984	1.049	98.9	97.3	103.7	79	79	79	25718.1	0	2708.71	57
FALSE	High	Master Protein	A6B5L2	DNA-directed RNA polymerase subunit beta OS=Vibrio parahaemolyticus serotype O3:K6 (strain AQ3810) GN=rpoB PE=3 SV=1	0	1095.29	76.9001	83	432	83	1	1342	149.46	5.22	High	High	High		0.925	1.03	101.5	93.9	104.6	104	104	104	174.463	0	1654.03	83
FALSE	High	Master Protein	A6B801	Chaperone protein ClpB OS=Vibrio parahaemolyticus serotype O3:K6 (strain AQ3810) GN=clpB PE=3 SV=1	0	1013.41	76.6628	65	449	64	1	857	95.813	5.45	High	High	High		1.404	0.981	88.6	124.5	86.9	87	87	87	999	1	1717.4	65
FALSE	High	Master Protein	A6B460	Carbamoyl-phosphate synthase (glutamine-hydrolyzing) OS=Vibrio parahaemolyticus serotype O3:K6 (strain AQ3810) GN=carB PE=3 SV=1	0	952.539	77.7159	65	333	65	1	1077	117.789	5.03	High	High	High		0.772	0.945	110.4	85.2	104.3	91	91	91	238.215	0	1289.75	65
FALSE	High	Master Protein	A6B8R6	Aconitate hydratase B OS=Vibrio parahaemolyticus serotype O3:K6 (strain AQ3810) GN=acnB PE=3 SV=1	0	878.507	72.948	50	464	50	1	865	94.012	5.12	High	High	High		0.804	0.848	113.1	90.9	95.9	82	82	82	1569.65	0	1664.04	50
FALSE	High	Master Protein	A6AZI2	Glycerol kinase OS=Vibrio parahaemolyticus serotype O3:K6 (strain AQ3810) GN=glpK PE=3 SV=1	0	772.125	77.2277	32	721	32	1	505	55.647	5.19	High	High	High		1.47	0.961	87.4	128.5	84	56	56	56	41752.2	0	2503.92	32
FALSE	High	Master Protein	A6AZM3	Elongation factor G OS=Vibrio parahaemolyticus serotype O3:K6 (strain AQ3810) GN=fusA PE=3 SV=1	0	754.203	60.6322	36	403	35	1	696	76.319	4.93	High	High	High		0.988	1.092	97.4	96.2	106.4	59	59	59	2201.2	2	1593.45	36
FALSE	High	Master Protein	A6B3T3	Translation initiation factor IF-2 OS=Vibrio parahaemolyticus serotype O3:K6 (strain AQ3810) GN=infB PE=3 SV=1	0	745.207	62.9834	54	256	53	1	905	99.363	5.66	High	High	High		0.902	1.003	103.3	93.2	103.5	62	62	62	121.825	1	991.035	54
FALSE	High	Master Protein	A6B934	ATP synthase subunit alpha OS=Vibrio parahaemolyticus serotype O3:K6 (strain AQ3810) GN=atpA PE=3 SV=1	0	737.177	78.1676	41	463	41	1	513	55.471	5.21	High	High	High		1.169	1.139	90.7	106	103.3	58	58	58	2965.35	0	1724.26	41
FALSE	High	Master Protein	A6B4J9	Aldehyde-alcohol dehydrogenase OS=Vibrio parahaemolyticus serotype O3:K6 (strain AQ3810) GN=A79_5055 PE=3 SV=1	0	724.541	56.6667	39	281	39	1	900	97.062	6.07	High	High	High		0.962	1.287	92.3	88.8	118.8	52	52	52	240.534	0	1154.57	39
FALSE	High	Master Protein	A6B464	Protein translocase subunit SecA OS=Vibrio parahaemolyticus serotype O3:K6 (strain AQ3810) GN=secA PE=3 SV=1	0	722.632	63.7665	52	226	52	1	908	103.108	5.22	High	High	High		1.073	1.045	96.2	103.3	100.5	68	68	68	138.783	0	873.774	52
FALSE	High	Master Protein	A6B115	Formate acetyltransferase OS=Vibrio parahaemolyticus serotype O3:K6 (strain AQ3810) GN=pflB PE=4 SV=1	0	720.073	80.0792	49	303	47	1	758	84.466	5.43	High	High	High		0.909	1.114	99.2	90.2	110.5	71	71	71	354.648	2	1096.27	49
FALSE	High	Master Protein	A6B3G6	Periplasmic oligopeptide-binding protein OS=Vibrio parahaemolyticus serotype O3:K6 (strain AQ3810) GN=A79_1188 PE=4 SV=1	0	715.565	73.07	37	543	36	1	557	62.342	5.31	High	High	High		1.703	1.119	78.5	133.7	87.8	60	60	60	5274	2	1824.07	37
FALSE	High	Master Protein	A6B8C4	ATP synthase F1, beta subunit (Fragment) OS=Vibrio parahaemolyticus serotype O3:K6 (strain AQ3810) GN=atpD PE=3 SV=1	0	711.672	81.25	25	517	15	1	448	48.696	4.81	High	High	High		1.157	1.089	92.4	106.9	100.7	52	52	52	33245	14	2099.28	25
FALSE	High	Master Protein	A6AZI4	Glycerol-3-phosphate dehydrogenase OS=Vibrio parahaemolyticus serotype O3:K6 (strain AQ3810) GN=A79_4294 PE=3 SV=1	0	692.326	72.2543	30	407	30	1	519	58.558	6.44	High	High	High		1.001	0.896	103.6	103.6	92.8	55	55	55	5622.41	0	1583.71	30
FALSE	High	Master Protein	A6B4N3	2-oxoglutarate dehydrogenase, E1 component OS=Vibrio parahaemolyticus serotype O3:K6 (strain AQ3810) GN=sucA PE=4 SV=1	0	684.81	47.1838	43	281	43	1	941	106.016	5.97	High	High	High		1.254	0.938	94	117.8	88.2	61	61	61	470.969	0	1062.03	43
FALSE	High	Master Protein	A6B0Z8	Isocitrate dehydrogenase, NADP-dependent OS=Vibrio parahaemolyticus serotype O3:K6 (strain AQ3810) GN=A79_6062 PE=4 SV=1	0	681.981	68.2861	48	294	48	1	741	80.521	5.17	High	High	High		0.9	0.912	106.7	96	97.3	60	60	60	293.705	0	1087.81	48
FALSE	High	Master Protein	A6B4N5	Succinate dehydrogenase flavoprotein subunit OS=Vibrio parahaemolyticus serotype O3:K6 (strain AQ3810) GN=sdhA PE=3 SV=1	0	647.373	71.9388	36	350	36	1	588	64.207	5.96	High	High	High		1.189	0.878	97.8	116.3	85.9	59	59	59	1342.4	0	1239.78	36
FALSE	High	Master Protein	A6B4N8	Citrate synthase OS=Vibrio parahaemolyticus serotype O3:K6 (strain AQ3810) GN=gltA PE=3 SV=1	0	635.243	75.9907	26	308	26	1	429	48.188	6.02	High	High	High		1.473	0.885	89.4	131.6	79.1	47	47	47	25649.2	0	1299.02	26
FALSE	High	Master Protein	A6B9V5	Elongation factor Tu (Fragment) OS=Vibrio parahaemolyticus serotype O3:K6 (strain AQ3810) GN=tuf PE=3 SV=1	0	633.312	78.1532	25	920	16	1	444	48.567	5.11	High	High	High		1.031	1.074	96.6	99.6	103.8	37	37	37	999	11	4076.32	25
FALSE	High	Master Protein	A6B3T7	Polyribonucleotide nucleotidyltransferase OS=Vibrio parahaemolyticus serotype O3:K6 (strain AQ3810) GN=pnp PE=3 SV=1	0	624.651	72.4332	41	257	41	1	711	76.691	5.06	High	High	High		1.033	1.055	97.1	100.3	102.5	52	52	52	353.813	0	1045.43	41
FALSE	High	Master Protein	A6B120	PrkA AAA OS=Vibrio parahaemolyticus serotype O3:K6 (strain AQ3810) GN=A79_6084 PE=4 SV=1	0	619.188	70.6522	44	296	44	1	644	73.975	5.33	High	High	High		1.829	1.115	76.1	139.1	84.8	60	60	60	850.594	0	996.343	44
FALSE	High	Master Protein	A6B6D7	Alanine--tRNA ligase OS=Vibrio parahaemolyticus serotype O3:K6 (strain AQ3810) GN=alaS PE=3 SV=1	0	618.842	65.3488	49	217	48	1	860	93.91	5.26	High	High	High		1.102	1.043	95.4	105.1	99.5	57	57	57	90.678	1	832.968	49
FALSE	High	Master Protein	A6B9P6	60 kDa chaperonin OS=Vibrio parahaemolyticus serotype O3:K6 (strain AQ3810) GN=groL PE=3 SV=1	0	589.134	82.439	27	593	21	1	410	43.26	4.75	High	High	High		1.272	1.074	89.6	114	96.3	38	38	38	5335.7	7	2705.95	27
FALSE	High	Master Protein	A6B0M6	Outer membrane protein OmpA OS=Vibrio parahaemolyticus serotype O3:K6 (strain AQ3810) GN=A79_3739 PE=3 SV=1	0	571.899	67.1733	16	401	16	1	329	35.991	4.44	High	High	High		1.378	0.81	94.1	129.7	76.2	39	39	39	2.03092e+06	0	1713.58	16
FALSE	High	Master Protein	A6AZ22	Transketolase OS=Vibrio parahaemolyticus serotype O3:K6 (strain AQ3810) GN=tkt PE=3 SV=1	0	549.688	72.6998	36	253	36	1	663	71.934	5.12	High	High	High		1.251	1.018	91.8	114.8	93.5	50	50	50	878.923	0	935.877	36
FALSE	High	Master Protein	A6B2Y8	Peptidylprolyl isomerase OS=Vibrio parahaemolyticus serotype O3:K6 (strain AQ3810) GN=A79_5030 PE=4 SV=1	0	548.095	92.3747	39	211	39	1	459	50.77	4.45	High	High	High		1.159	1.075	92.8	107.5	99.7	50	50	50	804.842	0	812.831	39
FALSE	High	Master Protein	A6B9M3	Bifunctional protein PutA (Fragment) OS=Vibrio parahaemolyticus serotype O3:K6 (strain AQ3810) GN=A79_5166 PE=4 SV=1	0	529.381	59.5588	32	252	20	1	544	60.785	6.81	High	High	High		1.742	0.916	82	142.9	75.1	51	51	51	544.559	19	895.693	32
FALSE	High	Master Protein	A6B7T1	Ribonuclease E OS=Vibrio parahaemolyticus serotype O3:K6 (strain AQ3810) GN=rne PE=3 SV=1	0	520.072	49.3646	44	141	44	1	1023	114.064	8.79	High	High	High		0.943	1.01	101.6	95.8	102.6	51	51	51	40.941	0	563.667	44
FALSE	High	Master Protein	A6B3V4	Thymidine phosphorylase OS=Vibrio parahaemolyticus serotype O3:K6 (strain AQ3810) GN=deoA PE=3 SV=1	0	508.979	64.7059	22	188	22	1	442	46.933	4.89	High	High	High		0.955	0.963	102.8	98.2	99	36	36	36	1904.46	0	765.161	22
FALSE	High	Master Protein	A6B6W3	Glutamine--fructose-6-phosphate aminotransferase [isomerizing] OS=Vibrio parahaemolyticus serotype O3:K6 (strain AQ3810) GN=glmS PE=3 SV=1	0	487.812	58.1967	28	161	28	1	610	66.799	5.19	High	High	High		1.152	1.171	90.3	104	105.7	38	38	38	113.062	0	685.229	28
FALSE	High	Master Protein	A6B5Z4	DNA gyrase subunit B OS=Vibrio parahaemolyticus serotype O3:K6 (strain AQ3810) GN=gyrB PE=3 SV=1	0	480.866	52.1739	40	156	40	1	805	89.386	5.82	High	High	High		0.999	1.085	97.3	97.2	105.5	51	51	51	63.223	0	560.889	40
FALSE	High	Master Protein	A6B1B9	Phosphoenolpyruvate synthase OS=Vibrio parahaemolyticus serotype O3:K6 (strain AQ3810) GN=ppsA PE=3 SV=1	0	479.823	64.5283	41	195	41	1	795	88.088	4.92	High	High	High		0.865	1.01	104.4	90.3	105.4	51	51	51	76.426	0	740.283	41
FALSE	High	Master Protein	A6B6F1	Enolase OS=Vibrio parahaemolyticus serotype O3:K6 (strain AQ3810) GN=eno PE=3 SV=1	0	476.319	62.5866	24	356	24	1	433	45.533	4.93	High	High	High		1.058	1.136	93.9	99.4	106.7	32	32	32	2564.02	0	1511.04	24
FALSE	High	Master Protein	A6B0C2	60 kDa chaperonin OS=Vibrio parahaemolyticus serotype O3:K6 (strain AQ3810) GN=groL PE=3 SV=1	0	475.725	83.8346	40	213	39	1	532	56.31	4.93	High	High	High		1.559	1.359	76.6	119.4	104.1	51	51	51	755.463	1	728.143	40
FALSE	High	Master Protein	A6B8U9	Aspartate ammonia-lyase OS=Vibrio parahaemolyticus serotype O3:K6 (strain AQ3810) GN=aspA PE=3 SV=1	0	474.817	76.1905	23	187	23	1	483	52.7	5.19	High	High	High		0.642	0.977	114.6	73.5	111.9	37	37	37	302.92	0	729.071	23
FALSE	High	Master Protein	A6B601	Glycine--tRNA ligase beta subunit OS=Vibrio parahaemolyticus serotype O3:K6 (strain AQ3810) GN=glyS PE=3 SV=1	0	473.289	63.3721	36	154	36	1	688	76.151	4.92	High	High	High		0.947	1.1	98.5	93.3	108.3	42	42	42	46.197	0	584.697	36
FALSE	High	Master Protein	A6B3X2	Translation elongation factor OS=Vibrio parahaemolyticus serotype O3:K6 (strain AQ3810) GN=A79_2025 PE=4 SV=1	0	464.22	63.8393	31	163	31	1	672	74.127	5.21	High	High	High		1.312	0.798	96.5	126.6	77	41	41	41	165.81	0	642.111	31
FALSE	High	Master Protein	A6B7D6	DNA gyrase subunit A OS=Vibrio parahaemolyticus serotype O3:K6 (strain AQ3810) GN=gyrA PE=3 SV=1	0	457.824	54.6697	46	177	46	1	878	97.04	5.06	High	High	High		0.843	1.048	103.7	87.5	108.8	54	54	54	56.446	0	589.098	46
FALSE	High	Master Protein	A6B511	Oxaloacetate decarboxylase alpha subunit OS=Vibrio parahaemolyticus serotype O3:K6 (strain AQ3810) GN=oadA PE=4 SV=1	0	457.314	73.6134	31	178	31	1	595	64.163	5.11	High	High	High		1.388	0.918	90.7	125.9	83.3	43	43	43	375.494	0	675.933	31
FALSE	High	Master Protein	A6B647	Transcription termination factor Rho OS=Vibrio parahaemolyticus serotype O3:K6 (strain AQ3810) GN=rho PE=3 SV=1	0	453.671	78.4543	29	253	29	1	427	47.695	6.98	High	High	High		1.132	1.001	95.8	108.4	95.9	39	39	39	609.54	0	915.269	29
FALSE	High	Master Protein	A6B1L8	Tryptophanase OS=Vibrio parahaemolyticus serotype O3:K6 (strain AQ3810) GN=tnaA PE=3 SV=1	0	450.866	80.3383	32	197	32	1	473	53.401	5.41	High	High	High		2.171	1.087	70.5	153	76.6	47	47	47	452.158	0	656.976	32
FALSE	High	Master Protein	A6B7N4	Endopeptidase La (Fragment) OS=Vibrio parahaemolyticus serotype O3:K6 (strain AQ3810) GN=lon PE=3 SV=1	0	449.763	64.69	41	155	41	1	742	83.104	5.86	High	High	High		1.053	1.08	95.8	100.8	103.4	50	50	50	104.372	0	578.63	41
FALSE	High	Master Protein	A6B7N1	Trigger factor OS=Vibrio parahaemolyticus serotype O3:K6 (strain AQ3810) GN=tig PE=3 SV=1	0	446.373	71.1982	26	180	26	1	434	48.225	4.77	High	High	High		0.508	1.163	112.3	57	130.6	36	36	36	477.63	0	743.231	26
FALSE	High	Master Protein	A6B2X8	Fumarate reductase flavoprotein subunit OS=Vibrio parahaemolyticus serotype O3:K6 (strain AQ3810) GN=frdA PE=3 SV=1	0	442.189	69.2821	33	199	33	1	599	66.065	5.55	High	High	High		0.822	0.95	108.2	88.9	102.9	48	48	48	243.844	0	733.288	33
FALSE	High	Master Protein	A6B551	ABC transporter, ATP-binding protein OS=Vibrio parahaemolyticus serotype O3:K6 (strain AQ3810) GN=A79_2094 PE=4 SV=1	0	441.725	70.4505	29	151	29	1	555	62.207	5.25	High	High	High		1.059	1.104	94.9	100.5	104.7	36	36	36	99	0	604.799	29
FALSE	High	Master Protein	A6B5V2	Penicillin-binding protein 1A (PBP-1a) (PBP1a) OS=Vibrio parahaemolyticus serotype O3:K6 (strain AQ3810) GN=A79_1364 PE=4 SV=1	0	432.933	64.7196	44	125	44	1	856	94.9	5.67	High	High	High		1.245	0.988	92.8	115.5	91.7	54	54	54	26.953	0	440.564	44
FALSE	High	Master Protein	A6B9Y9	Translation elongation factor G (Fragment) OS=Vibrio parahaemolyticus serotype O3:K6 (strain AQ3810) GN=fusA PE=3 SV=1	0	425.395	61.658	26	123	25	1	579	64.217	4.87	High	High	High		0.848	1.047	103.6	87.9	108.5	32	32	32	113.062	0	480.331	26
FALSE	High	Master Protein	A6B567	Isoleucine--tRNA ligase OS=Vibrio parahaemolyticus serotype O3:K6 (strain AQ3810) GN=ileS PE=3 SV=1	0	420.616	52.2293	39	141	39	1	942	105.241	5.59	High	High	High		0.952	1.087	98.7	94	107.3	46	46	46	25.827	0	500.099	39
FALSE	High	Master Protein	A6B6S5	Acetyl-coenzyme A synthetase OS=Vibrio parahaemolyticus serotype O3:K6 (strain AQ3810) GN=acsA PE=3 SV=1	0	408.971	55.6923	30	176	30	1	650	71.774	5.53	High	High	High		1.279	1.213	85.9	109.9	104.2	42	42	42	195.842	0	593.657	30
FALSE	High	Master Protein	A6B4S9	Peptide ABC transporter, ATP-binding protein OS=Vibrio parahaemolyticus serotype O3:K6 (strain AQ3810) GN=A79_6283 PE=3 SV=1	0	406.098	67.2504	30	194	29	1	571	63.622	6.73	High	High	High		1.431	0.972	88.2	126.1	85.7	42	42	42	155.475	2	685.257	30
FALSE	High	Master Protein	A6B849	Phosphoenolpyruvate carboxykinase [ATP] OS=Vibrio parahaemolyticus serotype O3:K6 (strain AQ3810) GN=pckA PE=3 SV=1	0	404.839	75.2768	33	195	33	1	542	59.988	5.21	High	High	High		0.486	0.873	127.2	61.8	111	39	39	39	93.12	0	742.239	33
FALSE	High	Master Protein	A6B7L9	Ribonuclease R OS=Vibrio parahaemolyticus serotype O3:K6 (strain AQ3810) GN=rnr PE=3 SV=1	0	404.445	63.5897	39	139	12	1	780	89.117	6.05	High	High	High		1.172	0.937	96.5	113.1	90.4	47	47	47	35.517	32	497.244	39
FALSE	High	Master Protein	A6B837	Acetyltransferase component of pyruvate dehydrogenase complex OS=Vibrio parahaemolyticus serotype O3:K6 (strain AQ3810) GN=aceF PE=3 SV=1	0	403.656	53.11	31	251	31	1	627	64.93	4.75	High	High	High		1.724	1.25	75.5	130.2	94.3	39	39	39	303.699	0	853.515	31
FALSE	High	Master Protein	A6B3F8	Phosphate acetyltransferase OS=Vibrio parahaemolyticus serotype O3:K6 (strain AQ3810) GN=A79_1180 PE=3 SV=1	0	403.411	54.902	30	170	30	1	714	76.631	5.2	High	High	High		0.96	1.072	98.9	95	106.1	35	35	35	81.54	0	723.835	30
FALSE	High	Master Protein	A6B9V4	ATP-dependent metallopeptidase HflB (Fragment) OS=Vibrio parahaemolyticus serotype O3:K6 (strain AQ3810) GN=hflB PE=3 SV=1	0	400.289	63.6213	35	167	35	1	602	66.519	5.54	High	High	High		0.946	1.011	101.4	96	102.6	49	49	49	166.88	0	525.685	35
FALSE	High	Master Protein	A6B886	Phenylalanine--tRNA ligase beta subunit OS=Vibrio parahaemolyticus serotype O3:K6 (strain AQ3810) GN=pheT PE=3 SV=1	0	398.671	63.5484	26	113	26	1	620	67.937	4.93	High	High	High		0.977	1.062	98.7	96.4	104.9	30	30	30	50.795	0	505.316	26
FALSE	High	Master Protein	A6B3V3	Deoxyribose-phosphate aldolase OS=Vibrio parahaemolyticus serotype O3:K6 (strain AQ3810) GN=deoC PE=3 SV=1	0	397.279	87.9845	19	161	19	1	258	27.727	4.83	High	High	High		0.837	0.963	107.2	89.6	103.2	28	28	28	1894.74	0	617.402	19
FALSE	High	Master Protein	A6B7L5	Adenylosuccinate synthetase OS=Vibrio parahaemolyticus serotype O3:K6 (strain AQ3810) GN=purA PE=3 SV=1	0	393.342	69.4064	25	131	25	1	438	47.663	5.55	High	High	High		0.991	1.116	96.5	95.7	107.8	37	37	37	246.091	0	520.78	25
FALSE	High	Master Protein	A6B8Z1	Valine--tRNA ligase OS=Vibrio parahaemolyticus serotype O3:K6 (strain AQ3810) GN=valS PE=3 SV=1	0	392.538	45.2456	41	137	41	1	957	109.106	5.21	High	High	High		0.856	1.002	104.9	89.9	105.2	47	47	47	17.997	0	465.884	41
FALSE	High	Master Protein	A6B6V4	Lysine--tRNA ligase OS=Vibrio parahaemolyticus serotype O3:K6 (strain AQ3810) GN=lysS PE=3 SV=1	0	392.515	59.4059	29	183	28	1	505	57.521	5.16	High	High	High		1.025	1.063	97.1	99.6	103.3	44	44	44	214.443	1	664.054	29
FALSE	High	Master Protein	A6B4S8	Peptide ABC transporter, periplasmic peptide-binding protein OS=Vibrio parahaemolyticus serotype O3:K6 (strain AQ3810) GN=A79_6282 PE=4 SV=1	0	380.475	64.7399	22	128	22	1	519	57.672	6.37	High	High	High		0.563	0.943	119.7	67.4	112.9	39	39	39	254.51	0	508.34	22
FALSE	High	Master Protein	A6AZE9	Na(+)-translocating NADH-quinone reductase subunit A OS=Vibrio parahaemolyticus serotype O3:K6 (strain AQ3810) GN=nqrA PE=3 SV=1	0	380.409	57.0815	26	192	26	1	466	50.98	6.64	High	High	High		1.08	0.949	99	107	94	36	36	36	586.802	0	704.024	26
FALSE	High	Master Protein	A6AYD5	Catalase-peroxidase OS=Vibrio parahaemolyticus serotype O3:K6 (strain AQ3810) GN=katG PE=3 SV=1	0	380.051	44.7761	28	143	23	1	737	82.125	5.17	High	High	High		1.712	1.018	80.4	137.7	81.9	42	42	42	75.024	6	447.751	28
FALSE	High	Master Protein	A6B4H8	GMP synthase [glutamine-hydrolyzing] OS=Vibrio parahaemolyticus serotype O3:K6 (strain AQ3810) GN=guaA PE=3 SV=1	0	379.035	78.53	32	139	32	1	517	57.635	5.07	High	High	High		0.9	1.049	101.7	91.6	106.7	41	41	41	105.8	0	534.924	32
FALSE	High	Master Protein	A6B4N1	Succinyl-CoA ligase [ADP-forming] subunit beta OS=Vibrio parahaemolyticus serotype O3:K6 (strain AQ3810) GN=sucC PE=3 SV=1	0	376.571	61.3402	19	216	19	1	388	41.516	5	High	High	High		1.058	0.988	98.5	104.2	97.3	25	25	25	576.969	0	877.158	19
FALSE	High	Master Protein	A6B6K9	NAD-dependent malic enzyme OS=Vibrio parahaemolyticus serotype O3:K6 (strain AQ3810) GN=maeA PE=3 SV=1	0	375.597	69.7509	28	123	28	1	562	62.26	5.92	High	High	High		1.132	0.959	97.1	109.9	93.1	37	37	37	92.057	0	490.832	28
FALSE	High	Master Protein	A6B4R2	Acyl-coenzyme A dehydrogenase OS=Vibrio parahaemolyticus serotype O3:K6 (strain AQ3810) GN=A79_1933 PE=4 SV=1	0	374.893	45.6579	33	155	33	1	760	83.314	6.39	High	High	High		1.645	0.995	82.4	135.6	82	48	48	48	59.619	0	479.903	33
FALSE	High	Master Protein	A6B4J1	Peptidase B OS=Vibrio parahaemolyticus serotype O3:K6 (strain AQ3810) GN=pepB PE=3 SV=1	0	374.453	87.037	26	150	26	1	432	46.582	5.69	High	High	High		1.082	0.969	98.3	106.4	95.3	36	36	36	729.527	0	580.393	26
FALSE	High	Master Protein	A6AZH9	Glycerophosphoryl diester phosphodiesterase OS=Vibrio parahaemolyticus serotype O3:K6 (strain AQ3810) GN=A79_4289 PE=4 SV=1	0	373.553	79.7721	23	136	23	1	351	39.933	5.34	High	High	High		0.358	0.738	143.1	51.2	105.6	38	38	38	1872.82	0	485.023	23
FALSE	High	Master Protein	A6BA93	3-oxoacyl-[acyl-carrier-protein] synthase 1 OS=Vibrio parahaemolyticus serotype O3:K6 (strain AQ3810) GN=A79_2741 PE=3 SV=1	0	372.551	71.464	16	136	11	1	403	42.591	5.1	High	High	High		1.01	1.022	98.9	100	101.1	29	29	29	427.133	9	631.486	16
FALSE	High	Master Protein	A6B7L2	Protein HflK OS=Vibrio parahaemolyticus serotype O3:K6 (strain AQ3810) GN=A79_3080 PE=4 SV=1	0	372.354	59.75	21	174	21	1	400	44.21	5.26	High	High	High		1.474	0.991	86.6	127.6	85.8	32	32	32	523.807	0	619.459	21
FALSE	High	Master Protein	A6B3V5	Phosphopentomutase OS=Vibrio parahaemolyticus serotype O3:K6 (strain AQ3810) GN=deoB PE=3 SV=1	0	371.716	61.0837	19	135	19	1	406	44.07	5.01	High	High	High		0.722	1.017	109.5	79.1	111.4	27	27	27	181.335	0	580.693	19
FALSE	High	Master Protein	A6B407	Chaperone protein HtpG OS=Vibrio parahaemolyticus serotype O3:K6 (strain AQ3810) GN=htpG PE=3 SV=1	0	370.323	52.8391	29	137	29	1	634	72.102	5.07	High	High	High		0.642	1.197	105.7	67.9	126.5	42	42	42	31.442	0	496.358	29
FALSE	High	Master Protein	A6B4N2	Dihydrolipoyllysine-residue succinyltransferase component of 2-oxoglutarate dehydrogenase complex OS=Vibrio parahaemolyticus serotype O3:K6 (strain AQ3810) GN=sucB PE=3 SV=1	0	369.475	67.0823	28	198	28	1	401	43.675	5.57	High	High	High		1.487	0.952	87.2	129.7	83.1	33	33	33	999	0	701.425	28
FALSE	High	Master Protein	A6B7M2	Ketol-acid reductoisomerase OS=Vibrio parahaemolyticus serotype O3:K6 (strain AQ3810) GN=ilvC PE=3 SV=1	0	362.11	65.1822	25	122	25	1	494	54.66	4.86	High	High	High		1.302	1.041	89.7	116.9	93.4	33	33	33	99	0	483.846	25
FALSE	High	Master Protein	A6AYA3	Glycine dehydrogenase (decarboxylating) OS=Vibrio parahaemolyticus serotype O3:K6 (strain AQ3810) GN=gcvP PE=3 SV=1	0	361.439	44.8637	25	130	25	1	954	104.026	5.78	High	High	High		0.705	1.006	110.7	78	111.3	36	36	36	19.06	0	549.426	25
FALSE	High	Master Protein	A6B402	Asparagine synthase (Glutamine-hydrolyzing) OS=Vibrio parahaemolyticus serotype O3:K6 (strain AQ3810) GN=asnB PE=4 SV=1	0	361.045	63.5379	28	124	28	1	554	62.273	5.2	High	High	High		0.843	1.004	105.3	88.8	105.8	39	39	39	41.813	0	459.137	28
FALSE	High	Master Protein	A6B6F2	CTP synthase OS=Vibrio parahaemolyticus serotype O3:K6 (strain AQ3810) GN=pyrG PE=3 SV=1	0	360.232	66.3004	31	172	30	1	546	60.089	6.21	High	High	High		1.128	1.004	95.8	108	96.2	38	38	38	157.489	1	528.38	31
FALSE	High	Master Protein	A6AZE4	Na(+)-translocating NADH-quinone reductase subunit F OS=Vibrio parahaemolyticus serotype O3:K6 (strain AQ3810) GN=nqrF PE=3 SV=1	0	356.712	62.1622	19	179	19	1	407	45.054	4.89	High	High	High		1.138	1.022	94.9	108	97.1	31	31	31	1583.89	0	662.2	19
FALSE	High	Master Protein	A6B3T2	Transcription termination/antitermination protein NusA OS=Vibrio parahaemolyticus serotype O3:K6 (strain AQ3810) GN=nusA PE=3 SV=1	0	354.662	60.8081	26	114	26	1	495	54.911	4.48	High	High	High		0.99	1.095	97.2	96.3	106.5	34	34	34	274.423	0	444.834	26
FALSE	High	Master Protein	A6B0Z5	ATP-dependent Clp protease ATP-binding subunit ClpA OS=Vibrio parahaemolyticus serotype O3:K6 (strain AQ3810) GN=clpA PE=3 SV=1	0	353.083	58.9947	35	102	35	1	756	83.302	6.01	High	High	High		0.756	0.992	109.2	82.5	108.3	40	40	40	31.442	0	386.997	35
FALSE	High	Master Protein	A6B7V8	Elongation factor Ts OS=Vibrio parahaemolyticus serotype O3:K6 (strain AQ3810) GN=tsf PE=3 SV=1	0	349.956	86.121	22	225	22	1	281	29.755	5.19	High	High	High		0.69	1.071	108.7	74.9	116.4	32	32	32	773.264	0	897.564	22
FALSE	High	Master Protein	A6B4R3	Enoyl-[acyl-carrier-protein] reductase [NADH] OS=Vibrio parahaemolyticus serotype O3:K6 (strain AQ3810) GN=fabV PE=3 SV=1	0	347.003	64	22	112	22	1	400	43.941	4.89	High	High	High		0.838	0.999	105.7	88.6	105.6	39	39	39	397.107	0	426.38	22
FALSE	High	Master Protein	A6B4F0	Chromosome partition protein MukB OS=Vibrio parahaemolyticus serotype O3:K6 (strain AQ3810) GN=mukB PE=3 SV=1	0	345.39	37.4748	48	106	48	1	1489	169.86	5.25	High	High	High		0.775	1.059	105.9	82	112.1	50	50	50	4.36	0	333.741	48
FALSE	High	Master Protein	A6B1G9	Acriflavin resistance protein OS=Vibrio parahaemolyticus serotype O3:K6 (strain AQ3810) GN=A79_0173 PE=3 SV=1	0	342.22	41.5295	32	102	31	1	1033	114.357	4.98	High	High	High		1.499	0.945	87.1	130.6	82.3	43	43	43	33.953	1	348.063	32
FALSE	High	Master Protein	A6B893	Dihydrolipoyl dehydrogenase (Fragment) OS=Vibrio parahaemolyticus serotype O3:K6 (strain AQ3810) GN=A79_0350 PE=4 SV=1	0	340.984	63.8596	22	211	22	1	285	30.739	6.1	High	High	High		1.158	1.157	90.5	104.8	104.7	33	33	33	23712.7	0	737.296	22
FALSE	High	Master Protein	A6B4H9	Inosine-5'-monophosphate dehydrogenase OS=Vibrio parahaemolyticus serotype O3:K6 (strain AQ3810) GN=guaB PE=3 SV=1	0	333.498	76.8443	27	114	27	1	488	51.654	6.48	High	High	High		0.919	0.986	103.3	94.9	101.8	35	35	35	196.832	0	421.518	27
FALSE	High	Master Protein	A6B4M0	Arginine--tRNA ligase OS=Vibrio parahaemolyticus serotype O3:K6 (strain AQ3810) GN=argS PE=3 SV=1	0	333.335	59.792	30	94	30	1	577	63.83	5.11	High	High	High		0.739	1.029	108.4	80.1	111.5	34	34	34	27.184	0	364.631	30
FALSE	High	Master Protein	A6B4G4	DNA topoisomerase 1 OS=Vibrio parahaemolyticus serotype O3:K6 (strain AQ3810) GN=topA PE=3 SV=1	0	333.19	49.8858	34	99	34	1	876	97.95	7.33	High	High	High		0.911	1.088	100	91.1	108.9	38	38	38	9	0	362.732	34
FALSE	High	Master Protein	A6B7D4	Ribonucleoside-diphosphate reductase OS=Vibrio parahaemolyticus serotype O3:K6 (strain AQ3810) GN=A79_6382 PE=3 SV=1	0	333.159	58.5526	36	113	36	1	760	85.622	5.99	High	High	High		0.862	1.006	104.6	90.2	105.2	46	46	46	27.73	0	361.035	36
FALSE	High	Master Protein	A6AZX6	Fatty acid oxidation complex subunit alpha OS=Vibrio parahaemolyticus serotype O3:K6 (strain AQ3810) GN=fadJ PE=3 SV=1	0	332.311	56.4723	38	141	38	1	703	76.748	8.48	High	High	High		1.536	0.978	85.4	131.1	83.5	44	44	44	62.808	0	443.954	38
FALSE	High	Master Protein	A6B0W5	4-alpha-glucanotransferase OS=Vibrio parahaemolyticus serotype O3:K6 (strain AQ3810) GN=malQ PE=3 SV=1	0	331.197	52.3416	34	101	34	1	726	81.771	5.54	High	High	High		0.976	1.202	94.4	92.1	113.5	41	41	41	34.287	0	337.871	34
FALSE	High	Master Protein	A6B082	Outer membrane protein OmpA OS=Vibrio parahaemolyticus serotype O3:K6 (strain AQ3810) GN=A79_2822 PE=3 SV=1	0	327.684	67.0769	15	155	15	1	325	35.575	4.55	High	High	High		0.881	0.944	106.2	93.6	100.2	26	26	26	2510.89	0	629.169	15
FALSE	High	Master Protein	A6B775	Outer membrane protein assembly factor BamA OS=Vibrio parahaemolyticus serotype O3:K6 (strain AQ3810) GN=bamA PE=3 SV=1	0	316.748	51.7413	37	101	37	1	804	89.997	4.79	High	High	High		1.039	1.065	96.6	100.4	103	44	44	44	21.603	0	328.567	37
FALSE	High	Master Protein	A6B6D9	Protein RecA OS=Vibrio parahaemolyticus serotype O3:K6 (strain AQ3810) GN=recA PE=3 SV=1	0	316.284	67.7966	20	126	20	1	354	38.225	5.67	High	High	High		1.18	1.024	93.6	110.5	95.9	31	31	31	350.119	0	457.953	20
FALSE	High	Master Protein	A6B2S2	Malate dehydrogenase OS=Vibrio parahaemolyticus serotype O3:K6 (strain AQ3810) GN=mdh PE=3 SV=1	0	315.678	83.2797	17	132	17	1	311	32.152	4.93	High	High	High		0.598	0.925	118.9	71.1	110	22	22	22	214.443	0	585.638	17
FALSE	High	Master Protein	A6B9B6	DNA-directed RNA polymerase subunit alpha OS=Vibrio parahaemolyticus serotype O3:K6 (strain AQ3810) GN=rpoA PE=3 SV=1	0	315.598	81.8182	19	139	19	1	330	36.45	4.86	High	High	High		0.718	1.09	106.9	76.7	116.4	26	26	26	148.25	0	615.903	19
FALSE	High	Master Protein	A6B7X9	Aspartyl-tRNA synthetase (Fragment) OS=Vibrio parahaemolyticus serotype O3:K6 (strain AQ3810) GN=aspS PE=3 SV=1	0	313.546	75.4425	27	111	27	1	452	49.541	4.92	High	High	High		0.984	1.043	99.1	97.5	103.4	33	33	33	91.106	0	426.814	27
FALSE	High	Master Protein	A6B340	Cysteine desulfurase IscS OS=Vibrio parahaemolyticus serotype O3:K6 (strain AQ3810) GN=iscS PE=3 SV=1	0	313.345	75.495	23	100	23	1	404	44.967	5.9	High	High	High		0.855	1.069	102.6	87.7	109.7	32	32	32	143.544	0	358.771	23
FALSE	High	Master Protein	A6B3V6	Purine nucleoside phosphorylase DeoD-type OS=Vibrio parahaemolyticus serotype O3:K6 (strain AQ3810) GN=deoD PE=3 SV=1	0	311.428	64.0167	12	126	12	1	239	25.878	5.15	High	High	High		1.059	1.014	97.6	103.4	99	22	22	22	2893.27	0	488.581	12
FALSE	High	Master Protein	A6B890	Leucine--tRNA ligase OS=Vibrio parahaemolyticus serotype O3:K6 (strain AQ3810) GN=leuS PE=3 SV=1	0	311.188	48.6581	32	88	32	1	857	96.593	5	High	High	High		0.615	0.913	118.7	73	108.4	36	36	36	12.183	0	305.93	32
FALSE	High	Master Protein	A6B7L3	Protein HflC OS=Vibrio parahaemolyticus serotype O3:K6 (strain AQ3810) GN=hflC PE=3 SV=1	0	310.617	63.8037	26	171	26	1	326	37.112	6.27	High	High	High		1.58	0.987	84.1	132.9	83	38	38	38	1518.91	0	479.671	26
FALSE	High	Master Protein	A6B4P1	Phosphoglucomutase, alpha-D-glucose phosphate-specific OS=Vibrio parahaemolyticus serotype O3:K6 (strain AQ3810) GN=pgm PE=3 SV=1	0	307.763	56.7518	24	87	24	1	548	59.243	5.31	High	High	High		0.723	0.926	113.2	81.8	104.9	29	29	29	24.809	0	398.199	24
FALSE	High	Master Protein	A6B7A9	Acetylornithine aminotransferase OS=Vibrio parahaemolyticus serotype O3:K6 (strain AQ3810) GN=argD PE=3 SV=1	0	304.598	71.7122	19	147	19	1	403	43.334	5.8	High	High	High		1.174	1.179	89.5	105	105.5	27	27	27	167.761	0	567.339	19
FALSE	High	Master Protein	A6AXZ6	6-phosphogluconate dehydrogenase, decarboxylating OS=Vibrio parahaemolyticus serotype O3:K6 (strain AQ3810) GN=gnd PE=3 SV=1	0	301.193	58.9796	22	98	22	1	490	53.563	4.98	High	High	High		0.847	1.096	101.9	86.3	111.8	28	28	28	38.811	0	397.997	22
FALSE	High	Master Protein	A6B5D7	3-oxoacyl-[acyl-carrier-protein] synthase 2 OS=Vibrio parahaemolyticus serotype O3:K6 (strain AQ3810) GN=fabF PE=3 SV=1	0	300.042	55.7692	16	118	16	1	416	43.423	5.71	High	High	High		0.933	1.095	99.1	92.4	108.5	26	26	26	232.572	0	530.131	16
FALSE	High	Master Protein	A6B4Y8	Glyceraldehyde-3-phosphate dehydrogenase A (Fragment) OS=Vibrio parahaemolyticus serotype O3:K6 (strain AQ3810) GN=A79_3074 PE=3 SV=1	0	299.842	92.6087	17	149	9	1	230	24.094	5.88	High	High	High		1.032	1.107	95.6	98.6	105.8	21	21	21	2052.53	8	565.979	17
FALSE	High	Master Protein	A6AZD0	Proline--tRNA ligase OS=Vibrio parahaemolyticus serotype O3:K6 (strain AQ3810) GN=proS PE=3 SV=1	0	299.629	60.9457	23	99	23	1	571	63.274	5.05	High	High	High		0.959	1.114	97.6	93.6	108.7	28	28	28	29.47	0	419.432	23
FALSE	High	Master Protein	A6AY57	Aconitate hydratase OS=Vibrio parahaemolyticus serotype O3:K6 (strain AQ3810) GN=acnD PE=3 SV=1	0	299.219	48.6674	36	93	36	1	863	94.687	5.34	High	High	High		1.326	1.011	89.9	119.2	90.9	41	41	41	13.678	0	306.013	36
FALSE	High	Master Protein	A6B5J8	Bifunctional purine biosynthesis protein PurH OS=Vibrio parahaemolyticus serotype O3:K6 (strain AQ3810) GN=purH PE=3 SV=1	0	298.512	63.0189	26	77	26	1	530	57.285	5.12	High	High	High		0.892	1.055	101.8	90.8	107.4	31	31	31	37.747	0	288.301	26
FALSE	High	Master Protein	A6B8R4	Methionine synthase OS=Vibrio parahaemolyticus serotype O3:K6 (strain AQ3810) GN=metH PE=4 SV=1	0	297.452	42.4144	42	94	42	1	1226	136.133	4.96	High	High	High		1.01	0.943	101.6	102.6	95.8	44	44	44	5.348	0	305.671	42
FALSE	High	Master Protein	A6B816	Rod shape-determining protein MreB OS=Vibrio parahaemolyticus serotype O3:K6 (strain AQ3810) GN=A79_1281 PE=4 SV=1	0	293.227	65.1297	19	103	19	1	347	36.837	5.07	High	High	High		1.179	1.024	93.7	110.5	95.9	27	27	27	999	0	413.769	19
FALSE	High	Master Protein	A6B6F9	Fumarate hydratase, class I OS=Vibrio parahaemolyticus serotype O3:K6 (strain AQ3810) GN=A79_5660 PE=4 SV=1	0	293.131	64.1584	26	128	26	1	505	54.662	5.2	High	High	High		1.032	0.903	102.2	105.5	92.3	36	36	36	78.433	0	487.64	26
FALSE	High	Master Protein	A6B7I5	TolC protein OS=Vibrio parahaemolyticus serotype O3:K6 (strain AQ3810) GN=A79_3452 PE=4 SV=1	0	292.63	69.0045	22	122	22	1	442	47.954	4.88	High	High	High		1.318	0.984	90.9	119.7	89.4	25	25	25	54.048	0	508.527	22
FALSE	High	Master Protein	A6B4I6	Histidine--tRNA ligase OS=Vibrio parahaemolyticus serotype O3:K6 (strain AQ3810) GN=hisS PE=3 SV=1	0	292.48	68.2464	22	97	22	1	422	47.116	5.21	High	High	High		0.921	1.143	97.9	90.1	111.9	31	31	31	56.362	0	371.124	22
FALSE	High	Master Protein	A6B6W1	Pyruvate kinase OS=Vibrio parahaemolyticus serotype O3:K6 (strain AQ3810) GN=pyk PE=3 SV=1	0	291.631	56.8085	22	138	21	1	470	49.941	5.24	High	High	High		0.989	1.138	95.9	94.9	109.2	25	25	25	60.054	1	542.501	22
FALSE	High	Master Protein	A6B5C5	Pyruvate kinase OS=Vibrio parahaemolyticus serotype O3:K6 (strain AQ3810) GN=pyk PE=3 SV=1	0	291.594	70.4167	26	90	26	1	480	51.651	6.02	High	High	High		1.148	0.991	95.6	109.7	94.7	30	30	30	56.362	0	314.85	26
FALSE	High	Master Protein	A6B798	Phosphomethylpyrimidine synthase OS=Vibrio parahaemolyticus serotype O3:K6 (strain AQ3810) GN=thiC PE=3 SV=1	0	291.507	56.192	28	91	28	1	646	72.431	5.38	High	High	High		0.644	1.093	109.6	70.6	119.8	37	37	37	21.758	0	321.127	28
FALSE	High	Master Protein	A6B267	Phosphoribosylformylglycinamidine synthase OS=Vibrio parahaemolyticus serotype O3:K6 (strain AQ3810) GN=purL PE=3 SV=1	0	290.7	34.8694	35	107	35	1	1302	141.597	4.93	High	High	High		1	1.088	97.1	97.1	105.7	40	40	40	6.743	0	351.982	35
FALSE	High	Master Protein	A6B5A5	Glutamine synthetase OS=Vibrio parahaemolyticus serotype O3:K6 (strain AQ3810) GN=glnA PE=3 SV=1	0	290.457	66.5245	22	109	22	1	469	51.451	5.02	High	High	High		0.953	1.118	97.7	93.1	109.3	29	29	29	90.825	0	418.719	22
FALSE	High	Master Protein	A6B8X7	DNA topoisomerase 4 subunit B OS=Vibrio parahaemolyticus serotype O3:K6 (strain AQ3810) GN=parE PE=3 SV=1	0	288.724	46.3259	29	102	29	1	626	69.469	5.81	High	High	High		1.032	1.027	98.1	101.2	100.7	35	35	35	42.54	0	352.193	29
FALSE	High	Master Protein	A6B7Q7	Probable cytosol aminopeptidase OS=Vibrio parahaemolyticus serotype O3:K6 (strain AQ3810) GN=pepA PE=3 SV=1	0	288.394	54.3825	24	127	24	1	502	54.444	7.2	High	High	High		0.926	1.004	102.4	94.8	102.8	32	32	32	66.234	0	514.873	24
FALSE	High	Master Protein	A6AZZ7	CheA OS=Vibrio parahaemolyticus serotype O3:K6 (strain AQ3810) GN=A79_2638 PE=4 SV=1	0	282.985	36.1559	19	75	19	1	744	79.094	4.73	High	High	High		1.228	1.07	91	111.7	97.3	24	24	24	25.561	0	314.636	19
FALSE	High	Master Protein	A6BB07	Proline dehydrogenase (Fragment) OS=Vibrio parahaemolyticus serotype O3:K6 (strain AQ3810) GN=A79_0754 PE=4 SV=1	0	282.52	50.9859	18	154	1	1	355	39.569	6.76	High	High	High		1.82	0.933	79.9	145.5	74.6	8	8	8	283.804	7	560.058	18
FALSE	High	Master Protein	A6BBC5	Cysteine synthase A (O-acetylserine sulfhydrylase A) (O-acetylserine (Thiol)-lyase A) (Fragment) OS=Vibrio parahaemolyticus serotype O3:K6 (strain AQ3810) GN=A79_4084 PE=4 SV=1	0	281.048	91.0891	12	101	12	1	202	21.264	4.58	High	High	High		0.661	1.017	112.1	74	113.9	18	18	18	3161.28	0	506.385	12
FALSE	High	Master Protein	A6B709	Cbb3-type cytochrome c oxidase subunit OS=Vibrio parahaemolyticus serotype O3:K6 (strain AQ3810) GN=ccoP PE=3 SV=1	0	280.826	62.1019	17	117	16	1	314	34.177	5.3	High	High	High		1.232	0.986	93.2	114.8	91.9	26	26	26	214.443	1	454.375	17
FALSE	High	Master Protein	A6B133	Transcription-repair-coupling factor OS=Vibrio parahaemolyticus serotype O3:K6 (strain AQ3810) GN=mfd PE=3 SV=1	0	278.222	42.4111	44	85	44	1	1153	130.393	6.1	High	High	High		0.982	0.967	101.7	99.9	98.3	44	44	44	4.975	0	288.882	44
FALSE	High	Master Protein	A6B1U8	Oligoendopeptidase F OS=Vibrio parahaemolyticus serotype O3:K6 (strain AQ3810) GN=A79_5923 PE=3 SV=1	0	277.852	44.2276	20	90	20	1	615	69.518	4.94	High	High	High		1.186	0.953	95.6	113.3	91.1	27	27	27	35.869	0	341.568	20
FALSE	High	Master Protein	A6B7N3	ATP-dependent Clp protease ATP-binding subunit ClpX OS=Vibrio parahaemolyticus serotype O3:K6 (strain AQ3810) GN=clpX PE=3 SV=1	0	275.851	80.5164	24	76	24	1	426	46.664	4.96	High	High	High		0.878	1.041	102.8	90.3	107	28	28	28	68.183	0	300.847	24
FALSE	High	Master Protein	A6AXZ4	Glucose-6-phosphate 1-dehydrogenase OS=Vibrio parahaemolyticus serotype O3:K6 (strain AQ3810) GN=zwf PE=3 SV=1	0	275.664	62.8743	25	94	25	1	501	57.604	5.17	High	High	High		0.888	1.015	103.3	91.8	104.9	29	29	29	31.745	0	331.481	25
FALSE	High	Master Protein	A6B7I9	PhoH family protein OS=Vibrio parahaemolyticus serotype O3:K6 (strain AQ3810) GN=A79_2139 PE=4 SV=1	0	273.523	64.1921	23	102	23	1	458	51.545	5.11	High	High	High		2.553	1.017	65.6	167.6	66.8	29	29	29	82.768	0	393.801	23
FALSE	High	Master Protein	A6AZT0	NADH dehydrogenase OS=Vibrio parahaemolyticus serotype O3:K6 (strain AQ3810) GN=A79_3154 PE=4 SV=1	0	273.176	55.5556	23	86	23	1	567	61.974	5.34	High	High	High		0.871	1.157	99.1	86.3	114.6	28	28	28	24.119	0	328.987	23
FALSE	High	Master Protein	A6BA96	RNA polymerase sigma factor RpoS OS=Vibrio parahaemolyticus serotype O3:K6 (strain AQ3810) GN=rpoS PE=3 SV=1	0	273.087	53.9759	16	330	3	1	415	45.921	5.16	High	High	High		1.051	0.991	98.6	103.6	97.8	14	14	14	43.893	7	1215.51	16
FALSE	High	Master Protein	A6B935	ATP synthase gamma chain OS=Vibrio parahaemolyticus serotype O3:K6 (strain AQ3810) GN=atpG PE=3 SV=1	0	272.5	75.3472	19	111	19	1	288	31.839	6.95	High	High	High		1.021	1.125	95.3	97.3	107.3	29	29	29	761.699	0	420.791	19
FALSE	High	Master Protein	A6AX03	Peptidase S16, lon domain protein OS=Vibrio parahaemolyticus serotype O3:K6 (strain AQ3810) GN=A79_0442 PE=4 SV=1	0	271.861	49.6183	31	79	31	1	786	88.063	5.48	High	High	High		0.746	0.705	122.4	91.3	86.3	33	33	33	10.583	0	273.918	31
FALSE	High	Master Protein	A6B6U0	Aminopeptidase N OS=Vibrio parahaemolyticus serotype O3:K6 (strain AQ3810) GN=pepN PE=4 SV=1	0	270.971	42.5287	29	84	29	1	870	98.457	4.98	High	High	High		0.667	1.064	109.8	73.3	116.9	31	31	31	8.168	0	297.32	29
FALSE	High	Master Protein	A6B610	Fatty acid oxidation complex subunit alpha (Fragment) OS=Vibrio parahaemolyticus serotype O3:K6 (strain AQ3810) GN=fadB PE=3 SV=1	0	267.158	54.5031	25	90	16	1	644	69.982	6.18	High	High	High		1.634	1.084	80.7	131.9	87.4	33	33	33	25.827	12	317.411	25
FALSE	High	Master Protein	A6B6H1	Acriflavine resistance protein A OS=Vibrio parahaemolyticus serotype O3:K6 (strain AQ3810) GN=A79_6029 PE=3 SV=1	0	266.76	56.9921	17	88	17	1	379	40.437	5.29	High	High	High		1.204	0.913	96.2	115.9	87.9	19	19	19	124.893	0	356.181	17
FALSE	High	Master Protein	A6B7W6	Asparagine--tRNA ligase OS=Vibrio parahaemolyticus serotype O3:K6 (strain AQ3810) GN=asnS PE=3 SV=1	0	266.742	65.0215	25	107	25	1	466	52.557	5.06	High	High	High		0.976	1.146	96.1	93.8	110.1	32	32	32	50.248	0	395.578	25
FALSE	High	Master Protein	A6B3J8	Diguanylate cyclase/phosphodiesterase domain 1 OS=Vibrio parahaemolyticus serotype O3:K6 (strain AQ3810) GN=A79_2495 PE=4 SV=1	0	266.513	47.5	21	69	21	1	640	72.406	6.54	High	High	High		1.318	0.943	92	121.2	86.8	28	28	28	21.539	0	283.896	21
FALSE	High	Master Protein	A6AZ23	Transaldolase OS=Vibrio parahaemolyticus serotype O3:K6 (strain AQ3810) GN=tal PE=3 SV=1	0	266.33	74.0506	20	99	20	1	316	34.784	4.93	High	High	High		0.695	1.029	110.1	76.6	113.3	25	25	25	150.991	0	386.995	20
FALSE	High	Master Protein	A6B0W6	Alpha-1,4 glucan phosphorylase OS=Vibrio parahaemolyticus serotype O3:K6 (strain AQ3810) GN=A79_5429 PE=3 SV=1	0	266.186	44.6756	28	90	28	1	817	92.369	6.18	High	High	High		0.89	1.555	87.1	77.5	135.4	33	33	33	8.183	0	309.485	28
FALSE	High	Master Protein	A6B6D0	S-adenosylmethionine synthase OS=Vibrio parahaemolyticus serotype O3:K6 (strain AQ3810) GN=metK PE=3 SV=1	0	263.559	72.6562	19	79	19	1	384	41.964	5.15	High	High	High		0.947	1.012	101.4	96	102.6	26	26	26	89.474	0	303.974	19
FALSE	High	Master Protein	A6AZT9	Anaerobic ribonucleoside-triphosphate reductase OS=Vibrio parahaemolyticus serotype O3:K6 (strain AQ3810) GN=nrdD PE=4 SV=1	0	263.067	50.4249	32	91	31	1	706	79.474	6.23	High	High	High		1.128	0.955	97.3	109.8	92.9	39	39	39	17.738	1	303.264	32
FALSE	High	Master Protein	A6B6H2	AcrB protein OS=Vibrio parahaemolyticus serotype O3:K6 (strain AQ3810) GN=A79_6030 PE=3 SV=1	0	262.738	26.0209	23	81	22	1	1053	113.258	4.88	High	High	High		1.23	0.966	93.9	115.5	90.7	29	29	29	21.539	1	279.775	23
FALSE	High	Master Protein	A6B7B1	N-succinylglutamate 5-semialdehyde dehydrogenase OS=Vibrio parahaemolyticus serotype O3:K6 (strain AQ3810) GN=astD PE=3 SV=1	0	262.598	57.732	22	100	22	1	485	52.043	5.12	High	High	High		1.438	1.273	80.9	116.2	102.9	27	27	27	99	0	352.568	22
FALSE	High	Master Protein	A6B0M7	Phospho-2-dehydro-3-deoxyheptonate aldolase OS=Vibrio parahaemolyticus serotype O3:K6 (strain AQ3810) GN=A79_3740 PE=3 SV=1	0	261.424	65.1429	23	114	21	1	350	38.297	5.97	High	High	High		1.368	0.801	94.7	129.5	75.8	28	28	28	176.828	3	379.857	23
FALSE	High	Master Protein	A6B8A6	30S ribosomal protein S1 (Fragment) OS=Vibrio parahaemolyticus serotype O3:K6 (strain AQ3810) GN=A79_5909 PE=4 SV=1	0	259.78	82.7381	17	234	17	1	168	17.977	4.74	High	High	High		0.721	1.084	107	77.1	115.9	20	20	20	1210.53	0	1019.72	17
FALSE	High	Master Protein	A6B7I4	Bifunctional protein HldE OS=Vibrio parahaemolyticus serotype O3:K6 (strain AQ3810) GN=hldE PE=3 SV=1	0	259.709	62.8151	26	86	26	1	476	50.907	5.35	High	High	High		1.143	1.013	95.1	108.7	96.3	30	30	30	45.416	0	307.983	26
FALSE	High	Master Protein	A6B4N0	Succinyl-CoA ligase [ADP-forming] subunit alpha OS=Vibrio parahaemolyticus serotype O3:K6 (strain AQ3810) GN=A79_4160 PE=3 SV=1	0	259.53	76.8966	16	129	16	1	290	29.974	5.15	High	High	High		0.985	0.961	101.8	100.3	97.8	22	22	22	580.709	0	468.908	16
FALSE	High	Master Protein	A6B871	AsmA protein OS=Vibrio parahaemolyticus serotype O3:K6 (strain AQ3810) GN=A79_4040 PE=4 SV=1	0	259.451	48.6331	31	90	31	1	695	74.899	5.5	High	High	High		1.324	0.966	91.2	120.7	88.1	34	34	34	36.584	0	285.232	31
FALSE	High	Master Protein	A6B8P1	Soluble pyridine nucleotide transhydrogenase OS=Vibrio parahaemolyticus serotype O3:K6 (strain AQ3810) GN=sthA PE=3 SV=1	0	258.37	59.6567	21	87	21	1	466	51.317	6.48	High	High	High		1.305	0.946	92.3	120.4	87.3	26	26	26	34.622	0	295.946	21
FALSE	High	Master Protein	A6B8K0	Oligopeptidase A OS=Vibrio parahaemolyticus serotype O3:K6 (strain AQ3810) GN=A79_2977 PE=3 SV=1	0	258.103	50	28	95	27	1	680	76.938	5.05	High	High	High		0.874	1.122	100.1	87.5	112.3	34	34	34	18.953	1	322.884	28
FALSE	High	Master Protein	A6B8X3	Msha biogenesis protein mshe OS=Vibrio parahaemolyticus serotype O3:K6 (strain AQ3810) GN=A79_5330 PE=4 SV=1	0	257.244	57.4913	25	83	20	1	574	63.846	5.57	High	High	High		1.391	0.988	88.8	123.5	87.7	30	30	30	27.651	5	303.35	25
FALSE	High	Master Protein	A6AYY2	Dihydrodipicolinate synthetase family protein OS=Vibrio parahaemolyticus serotype O3:K6 (strain AQ3810) GN=A79_6213 PE=3 SV=1	0	256.144	69.7368	16	122	16	1	304	33.935	4.86	High	High	High		0.891	1.156	98.5	87.7	113.8	24	24	24	157.489	0	467.281	16
FALSE	High	Master Protein	A6AYQ0	ATP-dependent helicase HrpA OS=Vibrio parahaemolyticus serotype O3:K6 (strain AQ3810) GN=hrpA PE=4 SV=1	0	254.06	39.8502	50	90	50	1	1335	152.7	8.15	High	High	High		0.929	0.948	104.3	96.9	98.8	53	53	53	4.179	0	252.554	50
FALSE	High	Master Protein	A6AZ88	NAD/NADP-dependent betaine aldehyde dehydrogenase OS=Vibrio parahaemolyticus serotype O3:K6 (strain AQ3810) GN=betB PE=3 SV=1	0	254.015	51.2346	18	76	18	1	486	52.544	4.87	High	High	High		0.503	0.429	155.2	78.1	66.6	25	25	25	62.096	0	289.592	18
FALSE	High	Master Protein	A6B9U6	ATP-dependent 6-phosphofructokinase OS=Vibrio parahaemolyticus serotype O3:K6 (strain AQ3810) GN=pfkA PE=3 SV=1	0	250.386	59.6875	14	96	14	1	320	34.561	6.46	High	High	High		1.003	1.081	97.3	97.6	105.2	20	20	20	99	0	374.1	14
FALSE	High	Master Protein	A6B3F7	Acetate kinase OS=Vibrio parahaemolyticus serotype O3:K6 (strain AQ3810) GN=ackA PE=3 SV=1	0	250.046	63.0653	17	119	17	1	398	42.986	5.38	High	High	High		0.976	1.054	99	96.6	104.4	24	24	24	99	0	500.54	17
FALSE	High	Master Protein	A6B7N7	Methyl-accepting chemotaxis protein OS=Vibrio parahaemolyticus serotype O3:K6 (strain AQ3810) GN=A79_2148 PE=4 SV=1	0	248.202	43.8596	21	81	20	1	627	68.129	4.88	High	High	High		1.324	0.887	93.4	123.7	82.9	24	24	24	18.11	1	338.118	21
FALSE	High	Master Protein	A6B2R1	Fructose-1,6-bisphosphatase class 1 OS=Vibrio parahaemolyticus serotype O3:K6 (strain AQ3810) GN=fbp PE=3 SV=1	0	247.507	57.3964	17	109	17	1	338	37.276	5.26	High	High	High		0.902	0.994	103.6	93.5	102.9	24	24	24	243.844	0	398.423	17
FALSE	High	Master Protein	A6B8J0	UvrABC system protein A OS=Vibrio parahaemolyticus serotype O3:K6 (strain AQ3810) GN=uvrA PE=3 SV=1	0	247.465	43.7832	32	76	32	1	941	103.937	6.55	High	High	High		0.992	0.992	100.5	99.7	99.7	35	35	35	7.377	0	252.583	32
FALSE	High	Master Protein	A6AYA1	Serine hydroxymethyltransferase OS=Vibrio parahaemolyticus serotype O3:K6 (strain AQ3810) GN=glyA PE=3 SV=1	0	247.345	54.9884	19	98	19	1	431	46.482	6.76	High	High	High		0.852	1.27	96.1	81.8	122	26	26	26	51.481	0	372.566	19
FALSE	High	Master Protein	A6B6A2	OtnA protein OS=Vibrio parahaemolyticus serotype O3:K6 (strain AQ3810) GN=A79_4106 PE=4 SV=1	0	246.911	33.5208	26	89	26	1	889	98.315	5.6	High	High	High		1.136	1.112	92.4	104.9	102.7	27	27	27	10.514	0	271.437	26
FALSE	High	Master Protein	A6B6D5	Phosphoglycerate kinase (Fragment) OS=Vibrio parahaemolyticus serotype O3:K6 (strain AQ3810) GN=pgk PE=3 SV=1	0	245.578	59.8784	19	90	19	1	329	35.008	5.1	High	High	High		1.041	1.11	95.2	99.1	105.7	23	23	23	140.254	0	317.431	19
FALSE	High	Master Protein	A6B5U3	Phosphoenolpyruvate carboxylase OS=Vibrio parahaemolyticus serotype O3:K6 (strain AQ3810) GN=ppc PE=3 SV=1	0	242.176	48.4607	34	74	34	1	877	99.211	5.6	High	High	High		0.887	1.014	103.4	91.7	104.9	37	37	37	6.537	0	263.667	34
FALSE	High	Master Protein	A6B7J1	RNA polymerase-associated protein RapA OS=Vibrio parahaemolyticus serotype O3:K6 (strain AQ3810) GN=rapA PE=3 SV=1	0	241.256	39.2157	31	68	31	1	969	109.737	5	High	High	High		0.994	1.047	98.7	98	103.3	34	34	34	4.677	0	235.921	31
FALSE	High	Master Protein	A6B451	Glutamate synthase [NADPH] large chain OS=Vibrio parahaemolyticus serotype O3:K6 (strain AQ3810) GN=A79_2367 PE=4 SV=1	0	240.213	33.7592	34	67	34	1	1487	162.924	5.8	High	High	High		0.844	1.041	104	87.7	108.3	35	35	35	2.713	0	225.915	34
FALSE	High	Master Protein	A6BBV4	Putative uroporphyrin-III C-methyltransferase (Fragment) OS=Vibrio parahaemolyticus serotype O3:K6 (strain AQ3810) GN=A79_4665 PE=4 SV=1	0	240.052	83.2636	16	102	16	1	239	27.076	5.27	High	High	High		1.299	0.895	93.9	122	84.1	22	22	22	420.697	0	384.664	16
FALSE	High	Master Protein	A6B620	Outer membrane protein OmpA OS=Vibrio parahaemolyticus serotype O3:K6 (strain AQ3810) GN=A79_5745 PE=3 SV=1	0	239.852	59.5611	14	75	14	1	319	34.052	4.54	High	High	High		0.946	1.104	98.4	93.1	108.6	18	18	18	236.137	0	308.238	14
FALSE	High	Master Protein	A6B874	Methionine--tRNA ligase (Fragment) OS=Vibrio parahaemolyticus serotype O3:K6 (strain AQ3810) GN=metG PE=3 SV=1	0	239.548	56.3126	25	79	25	1	499	57.186	5.39	High	High	High		0.876	1.057	102.3	89.6	108.1	31	31	31	29.539	0	273.24	25
FALSE	High	Master Protein	A6B1V9	Uncharacterized protein OS=Vibrio parahaemolyticus serotype O3:K6 (strain AQ3810) GN=A79_5934 PE=4 SV=1	0	239.034	37.5	25	74	25	1	896	100.62	4.91	High	High	High		0.59	1.218	106.8	63.1	130.1	26	26	26	4.443	0	304.564	25
FALSE	High	Master Protein	A6B5G5	Agglutination protein OS=Vibrio parahaemolyticus serotype O3:K6 (strain AQ3810) GN=A79_3986 PE=4 SV=1	0	238.726	60.0917	23	63	19	1	436	48.66	5.15	High	High	High		0.784	1.046	106	83.1	110.8	26	26	26	34.938	4	232.426	23
FALSE	High	Master Protein	A6AZV9	NAD(P) transhydrogenase subunit alpha OS=Vibrio parahaemolyticus serotype O3:K6 (strain AQ3810) GN=pntA PE=3 SV=1	0	238.71	55.0193	25	99	25	1	518	54.772	5.12	High	High	High		1.363	1.153	85.3	116.3	98.4	30	30	30	56.362	0	316.634	25
FALSE	High	Master Protein	A6B7K9	Acetyl-CoA carboxylase, biotin carboxylase OS=Vibrio parahaemolyticus serotype O3:K6 (strain AQ3810) GN=accC PE=4 SV=1	0	237.128	55.481	18	110	18	1	447	49.161	6.89	High	High	High		0.877	1.132	99.7	87.4	112.9	24	24	24	38.811	0	384.592	18
FALSE	High	Master Protein	A6AYY3	Ornithine cyclodeaminase OS=Vibrio parahaemolyticus serotype O3:K6 (strain AQ3810) GN=A79_6214 PE=4 SV=1	0	236.769	58.9506	16	108	16	1	324	35.401	5.05	High	High	High		1.328	1.126	86.9	115.3	97.8	22	22	22	277.256	0	411.706	16
FALSE	High	Master Protein	A6B0W8	HTH-type transcriptional regulator MalT OS=Vibrio parahaemolyticus serotype O3:K6 (strain AQ3810) GN=malT PE=3 SV=1	0	236.429	40.9091	28	68	28	1	902	104.012	6.38	High	High	High		1.08	0.97	98.3	106.2	95.4	28	28	28	5.105	0	249.182	28
FALSE	High	Master Protein	A6B979	Protein UshA OS=Vibrio parahaemolyticus serotype O3:K6 (strain AQ3810) GN=A79_3329 PE=3 SV=1	0	235.676	53.5714	24	83	24	1	560	62.108	5.25	High	High	High		1.106	1.111	93.3	103.1	103.6	30	30	30	41.987	0	275.364	24
FALSE	High	Master Protein	A6B5B7	DNA polymerase (Fragment) OS=Vibrio parahaemolyticus serotype O3:K6 (strain AQ3810) GN=A79_3264 PE=3 SV=1	0	232.114	53.9143	31	72	29	1	677	75.423	5	High	High	High		1.021	1.087	96.5	98.6	104.9	36	36	36	17.277	2	217.938	31
FALSE	High	Master Protein	A6B5Q8	LPS-assembly protein LptD OS=Vibrio parahaemolyticus serotype O3:K6 (strain AQ3810) GN=lptD PE=3 SV=1	0	228.851	41.3572	26	64	26	1	781	89.2	4.61	High	High	High		1.194	0.944	95.6	114.1	90.3	34	34	34	18.475	0	215.46	26
FALSE	High	Master Protein	A6B3G2	Oligopeptide transport ATP-binding protein OppF OS=Vibrio parahaemolyticus serotype O3:K6 (strain AQ3810) GN=A79_1184 PE=3 SV=1	0	228.841	65.7576	15	69	14	1	330	36.296	6.25	High	High	High		0.717	0.987	110.9	79.5	109.5	21	21	21	86.992	2	291.065	15
FALSE	High	Master Protein	A6AWY6	2-amino-3-ketobutyrate coenzyme A ligase OS=Vibrio parahaemolyticus serotype O3:K6 (strain AQ3810) GN=kbl PE=3 SV=1	0	227.201	61.461	16	81	16	1	397	43.111	5.81	High	High	High		0.461	0.864	129	59.5	111.4	21	21	21	43.893	0	293.309	16
FALSE	High	Master Protein	A6AX92	Periplasmic maltose-binding protein OS=Vibrio parahaemolyticus serotype O3:K6 (strain AQ3810) GN=A79_0532 PE=4 SV=1	0	227.146	61.2245	17	62	17	1	392	42.1	5	High	High	High		0.329	1.072	125	41.1	133.9	18	18	18	18.055	0	281.529	17
FALSE	High	Master Protein	A6B4A1	Trimethylamine-N-oxide reductase 2 OS=Vibrio parahaemolyticus serotype O3:K6 (strain AQ3810) GN=A79_0100 PE=3 SV=1	0	226.754	48.4663	29	75	29	1	815	89.787	6.71	High	High	High		0.68	1.116	107.3	73	119.7	32	32	32	7.685	0	259.118	29
FALSE	High	Master Protein	A6B4B7	tRNA modification GTPase MnmE OS=Vibrio parahaemolyticus serotype O3:K6 (strain AQ3810) GN=trmE PE=3 SV=1	0	226.685	60.7064	20	67	20	1	453	49.135	4.93	High	High	High		1.075	1.08	95.1	102.2	102.7	21	21	21	18.307	0	288.293	20
FALSE	High	Master Protein	A6B5Z0	Cell division protein FtsA OS=Vibrio parahaemolyticus serotype O3:K6 (strain AQ3810) GN=ftsA PE=3 SV=1	0	225.676	49.2857	14	64	14	1	420	45.373	5.19	High	High	High		1.551	1.033	83.7	129.8	86.5	19	19	19	58.255	0	237.787	14
FALSE	High	Master Protein	A6B345	Protein translocase subunit SecD OS=Vibrio parahaemolyticus serotype O3:K6 (strain AQ3810) GN=secD PE=3 SV=1	0	225.423	50.3236	24	75	24	1	618	66.824	6.32	High	High	High		1.078	1.175	92.2	99.4	108.3	25	25	25	18.11	0	269.526	24
FALSE	High	Master Protein	A6B594	Protease 2 OS=Vibrio parahaemolyticus serotype O3:K6 (strain AQ3810) GN=A79_0311 PE=4 SV=1	0	224.583	47.8502	23	64	23	1	721	82.083	5.16	High	High	High		1.166	0.994	94.9	110.7	94.3	30	30	30	14.459	0	213.345	23
FALSE	High	Master Protein	A6AYR5	Heat shock protein 70 OS=Vibrio parahaemolyticus serotype O3:K6 (strain AQ3810) GN=A79_6144 PE=3 SV=1	0	224.487	42.7807	32	63	32	1	935	104.43	6.06	High	High	High		1.103	1.026	95.9	105.8	98.4	34	34	34	4.677	0	200.856	32
FALSE	High	Master Protein	A6AWZ6	L-lactate dehydrogenase (Cytochrome) OS=Vibrio parahaemolyticus serotype O3:K6 (strain AQ3810) GN=A79_0435 PE=4 SV=1	0	224.465	63.5884	21	85	21	1	379	41.359	6.46	High	High	High		0.793	0.885	112	88.8	99.1	26	26	26	73.989	0	287.62	21
FALSE	High	Master Protein	A6B355	Antioxidant, AhpC/Tsa family OS=Vibrio parahaemolyticus serotype O3:K6 (strain AQ3810) GN=A79_0782 PE=4 SV=1	0	223.817	83.7438	14	171	14	1	203	22.223	5.17	High	High	High		0.586	0.831	124.1	72.8	103.1	18	18	18	629.957	0	593.908	14
FALSE	High	Master Protein	A6B9H3	50S ribosomal protein L5 OS=Vibrio parahaemolyticus serotype O3:K6 (strain AQ3810) GN=rplE PE=3 SV=1	0	222.4	66.4804	13	168	13	1	179	20.118	9.55	High	High	High		0.721	1.054	108.1	78	113.9	19	19	19	836.678	0	604.401	13
FALSE	High	Master Protein	A6B0I0	Glyceraldehyde-3-phosphate dehydrogenase OS=Vibrio parahaemolyticus serotype O3:K6 (strain AQ3810) GN=gap PE=3 SV=1	0	221.847	60.3774	21	74	21	1	477	52.255	6.55	High	High	High		0.65	0.953	115.3	74.9	109.9	23	23	23	41.17	0	267.282	21
FALSE	High	Master Protein	A6AYY7	NADP-dependent fatty aldehyde dehydrogenase OS=Vibrio parahaemolyticus serotype O3:K6 (strain AQ3810) GN=A79_6218 PE=4 SV=1	0	220.833	39.9606	16	103	16	1	508	54.697	5.5	High	High	High		0.853	0.941	107.4	91.6	101.1	17	17	17	32.246	0	425.029	16
FALSE	High	Master Protein	A6B362	Polyphosphate kinase OS=Vibrio parahaemolyticus serotype O3:K6 (strain AQ3810) GN=ppk PE=3 SV=1	0	220.309	52.2989	32	66	32	1	696	81.009	8.6	High	High	High		1.252	0.987	92.6	115.9	91.4	33	33	33	6.943	0	224.712	32
FALSE	High	Master Protein	A6B817	Cysteine--tRNA ligase (Fragment) OS=Vibrio parahaemolyticus serotype O3:K6 (strain AQ3810) GN=cysS PE=3 SV=1	0	220.036	50.54	20	71	19	1	463	52.385	5.11	High	High	High		0.848	1.011	105	89	106.1	23	23	23	22.263	0	242.452	20
FALSE	High	Master Protein	A6B4N4	Succinate dehydrogenase iron-sulfur subunit OS=Vibrio parahaemolyticus serotype O3:K6 (strain AQ3810) GN=A79_4164 PE=3 SV=1	0	219.963	77.5424	14	129	14	1	236	26.308	5.34	High	High	High		1.058	0.755	106.6	112.8	80.5	21	21	21	161.378	0	436.426	14
FALSE	High	Master Protein	A6B5J9	Phosphoribosylamine--glycine ligase OS=Vibrio parahaemolyticus serotype O3:K6 (strain AQ3810) GN=purD PE=3 SV=1	0	219.493	69.9301	18	58	18	1	429	45.762	4.68	High	High	High		0.897	0.997	103.7	93	103.3	21	21	21	21.19	0	241.978	18
FALSE	High	Master Protein	A6B421	Membrane protease subunit OS=Vibrio parahaemolyticus serotype O3:K6 (strain AQ3810) GN=A79_2303 PE=4 SV=1	0	219.408	61.3115	17	82	17	1	305	33.354	5.76	High	High	High		1.312	0.922	92.8	121.7	85.5	22	22	22	88.615	0	290.44	17
FALSE	High	Master Protein	A6B7V9	30S ribosomal protein S2 OS=Vibrio parahaemolyticus serotype O3:K6 (strain AQ3810) GN=rpsB PE=3 SV=1	0	217.312	58.2645	12	86	12	1	242	26.791	8.66	High	High	High		0.603	1.014	114.6	69.1	116.3	15	15	15	132.352	0	340.788	12
FALSE	High	Master Protein	A6B338	Methyl-accepting chemotaxis protein (Fragment) OS=Vibrio parahaemolyticus serotype O3:K6 (strain AQ3810) GN=A79_2461 PE=4 SV=1	0	216.574	52.1154	20	60	19	1	520	56.137	4.69	High	High	High		1.137	0.953	97.1	110.4	92.5	20	20	20	14.849	0	245.311	20
FALSE	High	Master Protein	A6B3R1	Adenylosuccinate lyase OS=Vibrio parahaemolyticus serotype O3:K6 (strain AQ3810) GN=purB PE=3 SV=1	0	215.965	62.5	24	69	24	1	456	51.444	5.43	High	High	High		0.727	1.256	100.6	73.1	126.3	27	27	27	25.827	0	239.53	24
FALSE	High	Master Protein	A6AY52	Bordetella uptake gene family protein OS=Vibrio parahaemolyticus serotype O3:K6 (strain AQ3810) GN=A79_1063 PE=4 SV=1	0	215.466	54.7988	17	64	17	1	323	34.758	5.59	High	High	High		0.748	1.325	97.6	73	129.4	22	22	22	39.616	0	249.827	17
FALSE	High	Master Protein	A6B101	Putative outer membrane porin protein locus of qsr prophage OS=Vibrio parahaemolyticus serotype O3:K6 (strain AQ3810) GN=A79_6065 PE=4 SV=1	0	214.7	50.5988	13	61	13	1	334	36.734	4.4	High	High	High		0.233	0.221	206.3	48.1	45.7	21	21	21	516.947	0	213.503	13
FALSE	High	Master Protein	A6B936	ATP synthase subunit beta (Fragment) OS=Vibrio parahaemolyticus serotype O3:K6 (strain AQ3810) GN=A79_3227 PE=4 SV=1	0	214.668	72.8205	11	154	1	1	195	20.795	5.07	High	High	High		1.306	1.31	83	108.4	108.7	1	1	1	3161.28	0	590.651	11
FALSE	High	Master Protein	A6B7F4	Sulfite reductase [NADPH] hemoprotein beta-component OS=Vibrio parahaemolyticus serotype O3:K6 (strain AQ3810) GN=cysI PE=3 SV=1	0	214.456	46.8858	24	62	24	1	578	64.834	6.9	High	High	High		0.816	0.978	107.4	87.6	105.1	26	26	26	10.325	0	235.174	24
FALSE	High	Master Protein	A6B5X6	Penicillin-binding protein activator LpoA OS=Vibrio parahaemolyticus serotype O3:K6 (strain AQ3810) GN=lpoA PE=3 SV=1	0	211.831	40.4643	23	64	23	1	603	67.514	5.01	High	High	High		1.217	0.962	94.4	114.9	90.8	27	27	27	16.783	0	236.543	23
FALSE	High	Master Protein	A6B969	Uncharacterized protein OS=Vibrio parahaemolyticus serotype O3:K6 (strain AQ3810) GN=A79_1685 PE=4 SV=1	0	210.854	73.617	10	75	10	1	235	25.459	5.02	High	High	High		1.877	0.798	81.6	153.2	65.1	14	14	14	350.119	0	365.087	10
FALSE	High	Master Protein	A6B812	Ribonuclease G OS=Vibrio parahaemolyticus serotype O3:K6 (strain AQ3810) GN=A79_1277 PE=4 SV=1	0	210.234	55.6237	25	71	25	1	489	55.323	5.36	High	High	High		1.15	1.013	94.9	109.1	96.1	29	29	29	30.623	0	223.545	25
FALSE	High	Master Protein	A6B257	Chaperone protein DnaJ OS=Vibrio parahaemolyticus serotype O3:K6 (strain AQ3810) GN=dnaJ PE=3 SV=1	0	209.941	55.8442	17	62	17	1	385	41.474	7.66	High	High	High		0.845	0.933	108	91.3	100.7	22	22	22	49.119	0	236.441	17
FALSE	High	Master Protein	A6B621	Glutamate--tRNA ligase OS=Vibrio parahaemolyticus serotype O3:K6 (strain AQ3810) GN=gltX PE=3 SV=1	0	209.704	65.4008	25	74	25	1	474	53.406	5.22	High	High	High		0.871	1.06	102.4	89.2	108.5	29	29	29	31.819	0	248.847	25
FALSE	High	Master Protein	A6B6I3	Alanine dehydrogenase OS=Vibrio parahaemolyticus serotype O3:K6 (strain AQ3810) GN=ald PE=3 SV=1	0	209.187	53.2086	15	79	15	1	374	39.871	5.44	High	High	High		0.96	1.371	90	86.5	123.5	19	19	19	68.519	0	316.086	15
FALSE	High	Master Protein	A6B7X4	Cytochrome D ubiquinol oxidase subunit 1 OS=Vibrio parahaemolyticus serotype O3:K6 (strain AQ3810) GN=A79_5811 PE=4 SV=1	0	209.122	28.5985	14	101	14	1	528	59.197	5.43	High	High	High		1.586	0.892	86.2	136.8	77	21	21	21	161.378	0	343.832	14
FALSE	High	Master Protein	A6B8J4	Elongation factor 4 OS=Vibrio parahaemolyticus serotype O3:K6 (strain AQ3810) GN=lepA PE=3 SV=1	0	208.151	48.4087	20	56	20	1	597	65.873	5.26	High	High	High		0.934	1.047	100.6	94	105.4	22	22	22	10.602	0	212.577	20
FALSE	High	Master Protein	A6B507	Protease, insulinase family/protease, insulinase family OS=Vibrio parahaemolyticus serotype O3:K6 (strain AQ3810) GN=A79_3787 PE=3 SV=1	0	205.117	33.4741	26	62	26	1	947	105.821	5	High	High	High		0.807	1.093	103.5	83.5	113.1	30	30	30	4.569	0	201.749	26
FALSE	High	Master Protein	A6B4I7	4-hydroxy-3-methylbut-2-en-1-yl diphosphate synthase (flavodoxin) OS=Vibrio parahaemolyticus serotype O3:K6 (strain AQ3810) GN=ispG PE=3 SV=1	0	204.802	59.4086	19	58	19	1	372	40.663	6.15	High	High	High		0.726	0.993	110.3	80.1	109.6	23	23	23	30.623	0	215.829	19
FALSE	High	Master Protein	A6B5V7	Lysine decarboxylase family protein OS=Vibrio parahaemolyticus serotype O3:K6 (strain AQ3810) GN=A79_3568 PE=4 SV=1	0	204.402	44.5916	20	74	20	1	453	50.556	5.76	High	High	High		0.82	0.914	109.7	90	100.3	26	26	26	33.551	0	269.312	20
FALSE	High	Master Protein	A6B980	2-dehydro-3-deoxyphosphooctonate aldolase OS=Vibrio parahaemolyticus serotype O3:K6 (strain AQ3810) GN=kdsA PE=3 SV=1	0	204.394	84.4523	20	75	20	1	283	30.79	5.69	High	High	High		0.993	1.109	96.7	96	107.3	25	25	25	58.255	0	272.289	20
FALSE	High	Master Protein	A6B901	Long-chain-fatty-acid--CoA ligase OS=Vibrio parahaemolyticus serotype O3:K6 (strain AQ3810) GN=A79_5901 PE=4 SV=1	0	203.782	41.5631	18	68	18	1	563	62.659	6.76	High	High	High		0.978	1.005	100.6	98.3	101.1	24	24	24	16.113	0	241.176	18
FALSE	High	Master Protein	A6B2X9	Succinate dehydrogenase iron-sulfur subunit OS=Vibrio parahaemolyticus serotype O3:K6 (strain AQ3810) GN=A79_5021 PE=3 SV=1	0	203.313	61.7886	13	88	13	1	246	27.482	5.08	High	High	High		0.806	0.945	109.1	87.9	103.1	21	21	21	2153.43	0	323.062	13
FALSE	High	Master Protein	A6B8Y2	Replicative DNA helicase OS=Vibrio parahaemolyticus serotype O3:K6 (strain AQ3810) GN=dnaB PE=3 SV=1	0	203.043	60.9442	21	63	21	1	466	51.677	5.06	High	High	High		1.168	1.021	94.1	109.9	96	24	24	24	13.497	0	221.01	21
FALSE	High	Master Protein	A6AZN1	Methyl-accepting chemotaxis protein OS=Vibrio parahaemolyticus serotype O3:K6 (strain AQ3810) GN=A79_3101 PE=4 SV=1	0	202.872	44.0147	19	60	18	1	543	59.405	4.82	High	High	High		1.045	0.936	100.6	105.2	94.2	18	18	18	16.433	0	240.679	19
FALSE	High	Master Protein	A6BB58	3-oxoacyl-[acyl-carrier-protein] synthase 1 (Fragment) OS=Vibrio parahaemolyticus serotype O3:K6 (strain AQ3810) GN=A79_3552 PE=4 SV=1	0	202.824	74.9245	15	65	1	1	331	35.907	5.27	High	High	High		1.041	0.946	100.4	104.6	95	1	1	1	51.75	0	280.506	15
FALSE	High	Master Protein	A6B4L4	2,4-dienoyl-coa reductase (Nadph) OS=Vibrio parahaemolyticus serotype O3:K6 (strain AQ3810) GN=A79_5071 PE=4 SV=1	0	202.796	45.6716	26	75	26	1	670	73.66	7.9	High	High	High		1.305	0.955	92	120.1	87.9	29	29	29	13.125	0	240.276	26
FALSE	High	Master Protein	A6B6M2	Aspartate carbamoyltransferase OS=Vibrio parahaemolyticus serotype O3:K6 (strain AQ3810) GN=pyrB PE=3 SV=1	0	202.374	59.697	19	75	19	1	330	36.821	5.44	High	High	High		1.189	0.971	95	112.9	92.2	20	20	20	87.587	0	300.145	19
FALSE	High	Master Protein	A6B7B3	Cyclic AMP receptor protein OS=Vibrio parahaemolyticus serotype O3:K6 (strain AQ3810) GN=A79_2717 PE=4 SV=1	0	200.576	72.381	15	108	15	1	210	23.65	7.91	High	High	High		1.147	0.999	95.4	109.3	95.3	22	22	22	734.642	0	343.642	15
FALSE	High	Master Protein	A6B833	Spermidine/putrescine import ATP-binding protein PotA OS=Vibrio parahaemolyticus serotype O3:K6 (strain AQ3810) GN=potA PE=3 SV=1	0	200.069	70.6199	22	79	22	1	371	42.023	5.25	High	High	High		1.371	0.94	90.6	124.2	85.2	24	24	24	73.057	0	275.553	22
FALSE	High	Master Protein	A6B768	DNA-directed DNA polymerase OS=Vibrio parahaemolyticus serotype O3:K6 (strain AQ3810) GN=A79_3939 PE=4 SV=1	0	199.67	33.132	33	72	33	1	1159	130.091	5.29	High	High	High		1.014	0.986	100	101.4	98.6	34	34	34	3.154	0	217.4	33
FALSE	High	Master Protein	A6B0Y3	Pullulanase OS=Vibrio parahaemolyticus serotype O3:K6 (strain AQ3810) GN=A79_5446 PE=3 SV=1	0	198.209	30.6998	27	52	27	1	1329	144.421	4.79	High	High	High		0.79	1.078	104.6	82.6	112.8	29	29	29	2.481	0	180.827	27
FALSE	High	Master Protein	A6B2S0	Immunogenic protein OS=Vibrio parahaemolyticus serotype O3:K6 (strain AQ3810) GN=A79_0854 PE=4 SV=1	0	196.115	40.9938	12	95	12	1	322	34.529	8.32	High	High	High		0.399	0.919	129.4	51.6	119	17	17	17	68.519	0	340.317	12
FALSE	High	Master Protein	A6B6C5	Glutathione synthetase OS=Vibrio parahaemolyticus serotype O3:K6 (strain AQ3810) GN=gshB PE=3 SV=1	0	195.426	56.962	15	69	15	1	316	35.2	5.06	High	High	High		1.007	1.097	96.7	97.3	106	22	22	22	76.426	0	278.914	15
FALSE	High	Master Protein	A6B5S6	Universal stress protein OS=Vibrio parahaemolyticus serotype O3:K6 (strain AQ3810) GN=A79_2203 PE=3 SV=1	0	195.293	93.617	11	99	11	1	141	16.344	5.2	High	High	High		1.525	0.886	88	134.1	77.9	18	18	18	5010.87	0	413.363	11
FALSE	High	Master Protein	A6B272	Aminoacyl-histidine dipeptidase OS=Vibrio parahaemolyticus serotype O3:K6 (strain AQ3810) GN=A79_2574 PE=4 SV=1	0	195.048	44.4898	16	63	16	1	490	53.622	4.87	High	High	High		0.713	1.022	109.7	78.2	112.1	19	19	19	26.542	0	256.66	16
FALSE	High	Master Protein	A6B406	Adenylate kinase OS=Vibrio parahaemolyticus serotype O3:K6 (strain AQ3810) GN=adk PE=3 SV=1	0	193.884	68.6916	14	101	13	1	214	23.28	5.11	High	High	High		0.968	1.103	97.7	94.6	107.8	18	18	18	340.455	0	354.802	14
FALSE	High	Master Protein	A6B3Z7	Glutamine--tRNA ligase OS=Vibrio parahaemolyticus serotype O3:K6 (strain AQ3810) GN=glnS PE=3 SV=1	0	193.156	49.4604	27	100	27	1	556	63.929	5.38	High	High	High		1.076	1.029	96.6	104	99.4	30	30	30	24.433	0	276.585	27
FALSE	High	Master Protein	A6B2Q7	Uncharacterized protein OS=Vibrio parahaemolyticus serotype O3:K6 (strain AQ3810) GN=A79_0841 PE=4 SV=1	0	193.124	33.0136	35	63	35	1	1251	135.421	4.79	High	High	High		1.185	1.03	93.3	110.6	96.1	34	34	34	3.233	0	202.376	35
FALSE	High	Master Protein	A6B907	Peptidyl-prolyl cis-trans isomerase OS=Vibrio parahaemolyticus serotype O3:K6 (strain AQ3810) GN=A79_5499 PE=4 SV=1	0	192.697	68.4615	16	93	16	1	260	28.25	4.83	High	High	High		1.109	1.046	95.1	105.5	99.5	22	22	22	734.642	0	320.055	16
FALSE	High	Master Protein	A6AY99	Aminomethyltransferase OS=Vibrio parahaemolyticus serotype O3:K6 (strain AQ3810) GN=gcvT PE=3 SV=1	0	192.255	53.9894	15	61	15	1	376	40.834	5.21	High	High	High		0.545	0.863	124.6	67.9	107.5	17	17	17	21.275	0	245.243	15
FALSE	High	Master Protein	A6B8U3	Delta-aminolevulinic acid dehydratase OS=Vibrio parahaemolyticus serotype O3:K6 (strain AQ3810) GN=hemB PE=3 SV=1	0	191.567	32.4859	10	80	10	1	354	39.272	5.17	High	High	High		1.07	1.022	97	103.8	99.2	17	17	17	114.478	0	283.092	10
FALSE	High	Master Protein	A6AYR4	Heat shock protein 70 OS=Vibrio parahaemolyticus serotype O3:K6 (strain AQ3810) GN=A79_6143 PE=3 SV=1	0	191.325	39.3846	18	48	16	1	650	70.72	4.82	High	High	High		0.897	1.089	100.5	90.1	109.4	21	21	21	10.659	3	190.187	18
FALSE	High	Master Protein	A6B9K7	Protease do OS=Vibrio parahaemolyticus serotype O3:K6 (strain AQ3810) GN=A79_1207 PE=4 SV=1	0	191.085	42.8571	14	45	14	1	455	48.119	6.98	High	High	High		0.503	0.996	120	60.4	119.5	20	20	20	16.013	0	187.413	14
FALSE	High	Master Protein	A6B4E3	ATP synthase subunit b OS=Vibrio parahaemolyticus serotype O3:K6 (strain AQ3810) GN=atpF PE=3 SV=1	0	190.704	61.5385	15	145	15	1	156	17.549	5.5	High	High	High		1.155	1.071	93	107.4	99.6	17	17	17	1994.26	0	497.849	15
FALSE	High	Master Protein	A6B9R2	General secretion pathway protein D (Fragment) OS=Vibrio parahaemolyticus serotype O3:K6 (strain AQ3810) GN=gspD PE=3 SV=1	0	190.272	40.5797	24	71	13	1	552	59.921	5.15	High	High	High		1.383	1.068	86.9	120.2	92.9	25	25	25	34.622	11	236.076	24
FALSE	High	Master Protein	A6B2L5	Guanosine-3',5'-bis(Diphosphate) 3'-pyrophosphohydrolase ((PpGpp)ase) OS=Vibrio parahaemolyticus serotype O3:K6 (strain AQ3810) GN=A79_0056 PE=3 SV=1	0	190.107	44.7592	28	51	28	1	706	79.775	8.82	High	High	High		0.989	0.967	101.5	100.3	98.2	32	32	32	6.044	0	166.651	28
FALSE	High	Master Protein	A6AX20	Purine nucleoside phosphorylase DeoD-type OS=Vibrio parahaemolyticus serotype O3:K6 (strain AQ3810) GN=deoD PE=3 SV=1	0	189.82	59.322	10	49	10	1	236	25.654	5.34	High	High	High		0.969	1.078	98.4	95.4	106.2	16	16	16	62.096	0	236.619	10
FALSE	High	Master Protein	A6B5W3	Lipoprotein OS=Vibrio parahaemolyticus serotype O3:K6 (strain AQ3810) GN=A79_3574 PE=3 SV=1	0	188.057	63.197	14	58	14	1	269	29.052	4.96	High	High	High		1.084	1.016	96.8	104.9	98.3	18	18	18	73.989	0	242.545	14
FALSE	High	Master Protein	A6B7W3	Aspartate-semialdehyde dehydrogenase OS=Vibrio parahaemolyticus serotype O3:K6 (strain AQ3810) GN=asd PE=3 SV=1	0	187.893	59.0504	13	43	13	1	337	37.243	5.17	High	High	High		1.014	1.074	97.2	98.5	104.3	15	15	15	24.809	0	186.927	13
FALSE	High	Master Protein	A6BA77	HemY protein (Fragment) OS=Vibrio parahaemolyticus serotype O3:K6 (strain AQ3810) GN=A79_4591 PE=4 SV=1	0	187.883	60.1286	16	60	16	1	311	35.427	7.01	High	High	High		1.359	0.981	89.8	122.1	88.1	20	20	20	99	0	231.993	16
FALSE	High	Master Protein	A6AYY4	Spermidine/putrescine-binding periplasmic protein OS=Vibrio parahaemolyticus serotype O3:K6 (strain AQ3810) GN=A79_6215 PE=4 SV=1	0	186.841	66.1064	16	74	16	1	357	39.246	5.14	High	High	High		0.475	1.218	111.4	52.9	135.7	17	17	17	34.481	0	283.962	16
FALSE	High	Master Protein	A6BAA2	Phosphoenolpyruvate-protein phosphotransferase (Fragment) OS=Vibrio parahaemolyticus serotype O3:K6 (strain AQ3810) GN=ptsI PE=3 SV=1	0	186.145	54.3424	16	68	16	1	403	44.761	4.73	High	High	High		0.791	1.16	101.7	80.4	117.9	18	18	18	34.112	0	283.277	16
FALSE	High	Master Protein	A6B645	ATP-dependent RNA helicase RhlB OS=Vibrio parahaemolyticus serotype O3:K6 (strain AQ3810) GN=rhlB PE=3 SV=1	0	185.621	49.6568	17	62	17	1	437	49.043	6.93	High	High	High		1.185	1.032	93.3	110.5	96.2	20	20	20	39.616	0	196.703	17
FALSE	High	Master Protein	A6B343	Inositol monophosphate family protein OS=Vibrio parahaemolyticus serotype O3:K6 (strain AQ3810) GN=A79_0770 PE=4 SV=1	0	185.123	64.0449	13	38	13	1	267	29.124	7.46	High	High	High		0.692	1.369	98	67.9	134.2	19	19	19	28.764	0	170.978	13
FALSE	High	Master Protein	A6B4I5	Uncharacterized protein OS=Vibrio parahaemolyticus serotype O3:K6 (strain AQ3810) GN=A79_5148 PE=4 SV=1	0	184.726	73.5294	12	65	11	1	204	22.311	4.58	High	High	High		1.05	0.893	101.9	107	91	16	16	16	83.834	0	242.714	12
FALSE	High	Master Protein	A6B2A7	Twin-arginine translocation pathway signal OS=Vibrio parahaemolyticus serotype O3:K6 (strain AQ3810) GN=A79_5119 PE=3 SV=1	0	184.655	35.7518	27	60	27	1	951	106.585	7.25	High	High	High		0.551	1.138	111.6	61.5	127	30	30	30	3.971	0	197.257	27
FALSE	High	Master Protein	A6B984	ATP-dependent protease ATPase subunit HslU OS=Vibrio parahaemolyticus serotype O3:K6 (strain AQ3810) GN=hslU PE=3 SV=1	0	184.514	43.5666	20	73	20	1	443	49.849	5.26	High	High	High		0.983	1.072	98.2	96.6	105.2	25	25	25	17.738	0	239.83	20
FALSE	High	Master Protein	A6AYY1	Polyamine-transporting ATPase OS=Vibrio parahaemolyticus serotype O3:K6 (strain AQ3810) GN=A79_6212 PE=3 SV=1	0	184.06	46.1126	14	53	14	1	373	41.358	5.9	High	High	High		1.166	1.215	88.7	103.5	107.8	20	20	20	25.102	0	209.084	14
FALSE	High	Master Protein	A6B049	Uracil phosphoribosyltransferase OS=Vibrio parahaemolyticus serotype O3:K6 (strain AQ3810) GN=upp PE=3 SV=1	0	183.991	64.9038	11	73	11	1	208	22.626	5.24	High	High	High		1.142	1.012	95.1	108.6	96.2	14	14	14	344.511	0	324.419	11
FALSE	High	Master Protein	A6B5R9	Probable HTH-type transcriptional regulator LeuO OS=Vibrio parahaemolyticus serotype O3:K6 (strain AQ3810) GN=A79_3648 PE=4 SV=1	0	183.198	77.116	18	44	18	1	319	36.169	6.65	High	High	High		0.676	0.978	113.1	76.4	110.5	23	23	23	36.276	0	180.2	18
FALSE	High	Master Protein	A6AY75	Alcohol dehydrogenase YqhD OS=Vibrio parahaemolyticus serotype O3:K6 (strain AQ3810) GN=A79_1471 PE=4 SV=1	0	183.027	57.5916	17	70	17	1	382	41.78	5	High	High	High		0.786	0.715	120	94.2	85.8	21	21	21	19.893	0	231.857	17
FALSE	High	Master Protein	A6B3U9	Peptide chain release factor 3 OS=Vibrio parahaemolyticus serotype O3:K6 (strain AQ3810) GN=prfC PE=3 SV=1	0	182.968	58.034	24	56	24	1	529	59.208	5.62	High	High	High		0.984	1.108	97	95.5	107.5	28	28	28	20.544	0	195.435	24
FALSE	High	Master Protein	A6B758	ADP-L-glycero-D-manno-heptose-6-epimerase OS=Vibrio parahaemolyticus serotype O3:K6 (strain AQ3810) GN=rfaD PE=3 SV=1	0	182.751	48.5623	13	58	13	1	313	35.194	4.97	High	High	High		1.073	0.975	98.4	105.6	96	19	19	19	62.096	0	196.901	13
FALSE	High	Master Protein	A6B3J7	Toxin secretion ATP-binding protein OS=Vibrio parahaemolyticus serotype O3:K6 (strain AQ3810) GN=A79_2494 PE=4 SV=1	0	182.72	39.3466	20	47	20	1	704	78.059	7.99	High	High	High		1.102	0.928	99	109.1	91.9	24	24	24	6.552	0	154.347	20
FALSE	High	Master Protein	A6B895	Hypoxanthine phosphoribosyltransferase OS=Vibrio parahaemolyticus serotype O3:K6 (strain AQ3810) GN=hpt PE=4 SV=1	0	182.211	65.9091	11	66	11	1	176	19.99	5.08	High	High	High		1.295	0.875	94.6	122.6	82.8	15	15	15	500.187	0	265.812	11
FALSE	High	Master Protein	A6B8C9	UTP--glucose-1-phosphate uridylyltransferase OS=Vibrio parahaemolyticus serotype O3:K6 (strain AQ3810) GN=galU PE=3 SV=1	0	181.676	63.1034	17	64	13	1	290	32.317	5.29	High	High	High		0.896	1.045	102	91.4	106.6	21	21	21	152.993	5	224.728	17
FALSE	High	Master Protein	A6B4E7	Gonadoliberin III-related protein OS=Vibrio parahaemolyticus serotype O3:K6 (strain AQ3810) GN=A79_0703 PE=4 SV=1	0	181.333	36.1277	17	74	17	1	501	54.864	6.83	High	High	High		1.288	0.903	94	121.1	84.9	20	20	20	25.827	0	261.178	17
FALSE	High	Master Protein	A6B5A2	GTP-binding protein TypA/BipA OS=Vibrio parahaemolyticus serotype O3:K6 (strain AQ3810) GN=typA PE=4 SV=1	0	180.778	33.0049	19	63	19	1	609	66.911	5.1	High	High	High		0.849	1.235	97.3	82.6	120.1	22	22	22	12.335	0	222.005	19
FALSE	High	Master Protein	A6B3G3	Oligopeptide transport ATP-binding protein OppD OS=Vibrio parahaemolyticus serotype O3:K6 (strain AQ3810) GN=A79_1185 PE=3 SV=1	0	180.645	72.8395	16	67	16	1	324	36.128	6.18	High	High	High		0.712	0.949	112.8	80.3	107	22	22	22	38.811	0	235.519	16
FALSE	High	Master Protein	A6B7X1	Aspartate aminotransferase OS=Vibrio parahaemolyticus serotype O3:K6 (strain AQ3810) GN=A79_2008 PE=3 SV=1	0	180.589	54.2929	19	74	19	1	396	43.299	5.16	High	High	High		0.642	0.974	114.7	73.7	111.7	19	19	19	18.055	0	271.504	19
FALSE	High	Master Protein	A6B609	3-ketoacyl-CoA thiolase OS=Vibrio parahaemolyticus serotype O3:K6 (strain AQ3810) GN=fadA PE=3 SV=1	0	180.357	46.5473	12	61	12	1	391	41.379	6.15	High	High	High		1.631	1.055	81.4	132.8	85.9	14	14	14	39.842	0	235.687	12
FALSE	High	Master Protein	A6B040	4-hydroxy-tetrahydrodipicolinate synthase OS=Vibrio parahaemolyticus serotype O3:K6 (strain AQ3810) GN=dapA PE=3 SV=1	0	180.043	62.3288	15	90	15	1	292	31.21	4.97	High	High	High		1.074	0.964	98.7	106	95.2	17	17	17	41.813	0	323.646	15
FALSE	High	Master Protein	A6B6E1	DNA mismatch repair protein MutS OS=Vibrio parahaemolyticus serotype O3:K6 (strain AQ3810) GN=mutS PE=3 SV=1	0	179.536	38.8042	27	52	27	1	853	94.928	5.91	High	High	High		0.925	1.034	101.4	93.8	104.8	27	27	27	6.743	0	172.75	27
FALSE	High	Master Protein	A6B6Q4	Mce related protein OS=Vibrio parahaemolyticus serotype O3:K6 (strain AQ3810) GN=A79_3347 PE=4 SV=1	0	179.398	35.1474	24	56	24	1	882	96.38	5.91	High	High	High		1.276	0.92	93.9	119.8	86.4	25	25	25	3.707	0	190.536	24
FALSE	High	Master Protein	A6AYW7	Homogentisate 1,2-dioxygenase OS=Vibrio parahaemolyticus serotype O3:K6 (strain AQ3810) GN=hmgA PE=3 SV=1	0	179.12	44.5055	14	51	14	1	364	41.724	6.09	High	High	High		2.058	1.05	73	150.3	76.7	17	17	17	41.813	0	203.36	14
FALSE	High	Master Protein	A6B8L0	ABC transporter ATP-binding protein uup OS=Vibrio parahaemolyticus serotype O3:K6 (strain AQ3810) GN=A79_4576 PE=4 SV=1	0	178.97	47.8873	28	77	28	1	639	72.602	5.16	High	High	High		1.142	1.018	94.9	108.4	96.7	29	29	29	11.115	0	220.29	28
FALSE	High	Master Protein	A6B501	Signal recognition particle protein OS=Vibrio parahaemolyticus serotype O3:K6 (strain AQ3810) GN=ffh PE=3 SV=1	0	178.557	48.4783	19	59	19	1	460	50.248	9.22	High	High	High		0.81	1.054	104.7	84.9	110.4	20	20	20	15.379	0	208.467	19
FALSE	High	Master Protein	A6B5Z1	Cell division protein FtsZ (Fragment) OS=Vibrio parahaemolyticus serotype O3:K6 (strain AQ3810) GN=A79_1329 PE=3 SV=1	0	178.317	93.2584	12	44	12	1	178	18.395	5.1	High	High	High		0.87	1.051	102.7	89.3	108	15	15	15	315.228	0	197.372	12
FALSE	High	Master Protein	A6B8P5	Pantothenate synthetase OS=Vibrio parahaemolyticus serotype O3:K6 (strain AQ3810) GN=panC PE=3 SV=1	0	178.236	57.4751	14	70	14	1	301	33.366	5.01	High	High	High		0.924	1.166	97.1	89.7	113.2	16	16	16	27.184	0	267.621	14
FALSE	High	Master Protein	A6B7W1	Bifunctional uridylyltransferase/uridylyl-removing enzyme (Fragment) OS=Vibrio parahaemolyticus serotype O3:K6 (strain AQ3810) GN=glnD PE=3 SV=1	0	177.89	36.3196	27	57	27	1	826	95.12	8.25	High	High	High		0.892	0.893	107.7	96.1	96.2	28	28	28	4.179	0	182.124	27
FALSE	High	Master Protein	A6B8S5	Uncharacterized protein OS=Vibrio parahaemolyticus serotype O3:K6 (strain AQ3810) GN=A79_0119 PE=4 SV=1	0	177.69	72.3757	7	64	7	1	181	19.769	5.15	High	High	High		1.519	0.943	86.7	131.6	81.7	13	13	13	315.228	0	269.459	7
FALSE	High	Master Protein	A6B4I3	GTPase Der OS=Vibrio parahaemolyticus serotype O3:K6 (strain AQ3810) GN=der PE=3 SV=1	0	177.288	50	23	71	23	1	498	55.794	5.76	High	High	High		0.936	1.011	101.8	95.3	102.9	27	27	27	16.783	0	223.444	23
FALSE	High	Master Protein	A6AYY6	Proline racemase OS=Vibrio parahaemolyticus serotype O3:K6 (strain AQ3810) GN=A79_6217 PE=3 SV=1	0	177.226	31.1295	8	118	8	1	363	39.925	5.6	High	High	High		1.576	0.89	86.6	136.4	77	14	14	14	586.802	0	407.983	8
FALSE	High	Master Protein	A6B7I0	Adenylate cyclase, putative OS=Vibrio parahaemolyticus serotype O3:K6 (strain AQ3810) GN=A79_3447 PE=4 SV=1	0	175.798	42.4658	21	56	21	1	511	59.204	5.1	High	High	High		1.032	1.02	98.3	101.4	100.3	23	23	23	10.602	0	197.074	21
FALSE	High	Master Protein	A6B876	Glycerol-3-phosphate acyltransferase OS=Vibrio parahaemolyticus serotype O3:K6 (strain AQ3810) GN=plsB PE=3 SV=1	0	175.732	40.9653	28	57	28	1	808	91.086	8.69	High	High	High		1.419	1.07	86	122	92	31	31	31	6.244	0	170.482	28
FALSE	High	Master Protein	A6B119	UPF0304 protein A79_6083 OS=Vibrio parahaemolyticus serotype O3:K6 (strain AQ3810) GN=A79_6083 PE=3 SV=1	0	175.14	89.759	12	65	12	1	166	19.829	5.58	High	High	High		0.739	0.817	117.4	86.8	95.9	19	19	19	810.131	0	242.755	12
FALSE	High	Master Protein	A6B4G3	Glucose-1-phosphate adenylyltransferase OS=Vibrio parahaemolyticus serotype O3:K6 (strain AQ3810) GN=glgC PE=3 SV=1	0	173.415	51.6049	17	80	17	1	405	45.454	5.63	High	High	High		1.316	0.945	92	121	87	25	25	25	27.943	0	255.927	17
FALSE	High	Master Protein	A6AZH8	2,3,4,5-tetrahydropyridine-2,6-dicarboxylate N-succinyltransferase OS=Vibrio parahaemolyticus serotype O3:K6 (strain AQ3810) GN=dapD PE=3 SV=1	0	173.287	49.5627	12	43	12	1	343	35.618	5.1	High	High	High		0.985	1.038	99.2	97.8	103	15	15	15	53.117	0	188.86	12
FALSE	High	Master Protein	A6B4T9	Uridine phosphorylase OS=Vibrio parahaemolyticus serotype O3:K6 (strain AQ3810) GN=udp PE=3 SV=1	0	173.198	78.9683	13	76	13	1	252	26.935	5.6	High	High	High		1.045	0.89	102.2	106.8	91	18	18	18	491.388	0	276.444	13
FALSE	High	Master Protein	A6B6J7	RNA polymerase sigma factor RpoD OS=Vibrio parahaemolyticus serotype O3:K6 (strain AQ3810) GN=rpoD PE=3 SV=1	0	173.164	36.2903	18	72	18	1	620	70.667	4.75	High	High	High		0.62	1.033	113.1	70.1	116.8	25	25	25	17.874	0	233.719	18
FALSE	High	Master Protein	A6B6M0	Arginine deiminase OS=Vibrio parahaemolyticus serotype O3:K6 (strain AQ3810) GN=arcA PE=3 SV=1	0	172.616	50.86	14	56	14	1	407	45.733	5.29	High	High	High		0.811	1.027	105.7	85.8	108.5	15	15	15	17.233	0	222.939	14
FALSE	High	Master Protein	A6B155	Alcohol dehydrogenase 2 OS=Vibrio parahaemolyticus serotype O3:K6 (strain AQ3810) GN=A79_1838 PE=4 SV=1	0	172.086	49.7382	12	68	12	1	382	40.165	5.24	High	High	High		0.533	0.976	119.5	63.7	116.7	14	14	14	28.764	0	265.399	12
FALSE	High	Master Protein	A6B644	Guanosine-5'-triphosphate,3'-diphosphate pyrophosphatase OS=Vibrio parahaemolyticus serotype O3:K6 (strain AQ3810) GN=gppA PE=3 SV=1	0	171.996	60.084	22	51	22	1	476	52.52	5.35	High	High	High		0.967	0.955	102.7	99.3	98	22	22	22	12.738	0	180.942	22
FALSE	High	Master Protein	A6B8G8	Msha biogenesis protein mshi OS=Vibrio parahaemolyticus serotype O3:K6 (strain AQ3810) GN=A79_4672 PE=4 SV=1	0	171.006	56.3275	19	59	10	1	403	45.099	6.96	High	High	High		1.08	0.98	98	105.9	96.1	20	20	20	25.49	11	206.005	19
FALSE	High	Master Protein	A6B7J9	FAD linked oxidase, C-domain protein OS=Vibrio parahaemolyticus serotype O3:K6 (strain AQ3810) GN=A79_4953 PE=4 SV=1	0	170.618	36.0672	32	54	32	1	1012	112.845	6.46	High	High	High		1.057	0.968	99.2	104.8	96	34	34	34	3.273	0	178.204	32
FALSE	High	Master Protein	A6B836	Dihydrolipoyl dehydrogenase (Fragment) OS=Vibrio parahaemolyticus serotype O3:K6 (strain AQ3810) GN=A79_4584 PE=4 SV=1	0	170.41	86.6071	9	81	9	1	112	11.893	8.65	High	High	High		1.154	1.101	92.2	106.4	101.5	11	11	11	2681.7	0	341.184	9
FALSE	High	Master Protein	A6B7N2	ATP-dependent Clp protease proteolytic subunit OS=Vibrio parahaemolyticus serotype O3:K6 (strain AQ3810) GN=clpP PE=3 SV=1	0	170.328	41.3462	6	42	6	1	208	22.912	5.21	High	High	High		1.052	0.94	100.2	105.5	94.3	12	12	12	315.228	0	225.956	6
FALSE	High	Master Protein	A6BB18	Proline dehydrogenase OS=Vibrio parahaemolyticus serotype O3:K6 (strain AQ3810) GN=A79_0346 PE=4 SV=1	0	170.15	40.1929	11	89	6	1	311	33.438	4.86	High	High	High		1.613	0.967	83.8	135.2	81.1	7	7	7	55.234	0	374.582	11
FALSE	High	Master Protein	A6B7B2	Uncharacterized protein OS=Vibrio parahaemolyticus serotype O3:K6 (strain AQ3810) GN=A79_2716 PE=4 SV=1	0	169.769	50.5703	9	52	9	1	263	29.199	4.92	High	High	High		1.23	1.492	80.6	99.2	120.2	14	14	14	34.938	0	213.694	9
FALSE	High	Master Protein	A6B593	Outer membrane protein N, non-specific porin OS=Vibrio parahaemolyticus serotype O3:K6 (strain AQ3810) GN=A79_0310 PE=4 SV=1	0	169.662	45.5587	11	153	11	1	349	37.95	4.67	High	High	High		1.142	0.97	96.4	110.1	93.5	15	15	15	169.125	0	502.56	11
FALSE	High	Master Protein	A6BA54	Tyrosine--tRNA ligase OS=Vibrio parahaemolyticus serotype O3:K6 (strain AQ3810) GN=tyrS PE=3 SV=1	0	169.519	44.3038	11	48	11	1	395	44.042	5.59	High	High	High		0.848	1.09	102.1	86.6	111.3	13	13	13	18.953	0	202.62	11
FALSE	High	Master Protein	A6B5K6	Uroporphyrinogen decarboxylase OS=Vibrio parahaemolyticus serotype O3:K6 (strain AQ3810) GN=hemE PE=3 SV=1	0	169.492	46.4789	11	52	11	1	355	39.138	5.58	High	High	High		0.731	0.907	113.7	83.1	103.1	18	18	18	73.989	0	180.983	11
FALSE	High	Master Protein	A6B7A4	Aminopeptidase P OS=Vibrio parahaemolyticus serotype O3:K6 (strain AQ3810) GN=A79_2783 PE=4 SV=1	0	169.475	39.4295	15	49	15	1	596	65.515	5.59	High	High	High		0.934	1.08	99.5	93	107.5	18	18	18	6.128	0	183.92	15
FALSE	High	Master Protein	A6B6S7	Cyclic nucleotide binding protein/2 CBS domains OS=Vibrio parahaemolyticus serotype O3:K6 (strain AQ3810) GN=A79_3585 PE=4 SV=1	0	169.206	41.7763	21	49	21	1	608	69.619	6.28	High	High	High		1.533	1.112	82.3	126.2	91.5	22	22	22	7.209	0	173.124	21
FALSE	High	Master Protein	A6B2Z5	Aminotransferase, class I OS=Vibrio parahaemolyticus serotype O3:K6 (strain AQ3810) GN=A79_5037 PE=4 SV=1	0	168.887	43.5644	15	54	15	1	404	45.278	6.86	High	High	High		1.489	0.985	86.4	128.6	85.1	19	19	19	43.668	0	187.728	15
FALSE	High	Master Protein	A6AZU3	Amino acid biosynthesis aminotransferase OS=Vibrio parahaemolyticus serotype O3:K6 (strain AQ3810) GN=A79_3167 PE=4 SV=1	0	168.617	50.3797	16	63	16	1	395	43.274	5.71	High	High	High		0.95	1.054	99.9	94.9	105.3	17	17	17	14.317	0	226.424	16
FALSE	High	Master Protein	A6B111	Amino acid ABC transporter, periplasmic amino acid-binding protein OS=Vibrio parahaemolyticus serotype O3:K6 (strain AQ3810) GN=A79_6075 PE=3 SV=1	0	168.391	73.0469	16	63	16	1	256	28.108	5.44	High	High	High		0.486	0.868	127.5	61.9	110.6	19	19	19	57.171	0	208.512	16
FALSE	High	Master Protein	A6B6Y0	Threonyl-tRNA synthetase OS=Vibrio parahaemolyticus serotype O3:K6 (strain AQ3810) GN=A79_1223 PE=4 SV=1	0	168.298	63.7631	14	53	14	1	287	32.744	5.14	High	High	High		1.027	1.014	98.6	101.3	100.1	19	19	19	73.989	0	199.173	14
FALSE	High	Master Protein	A6B424	DNA ligase OS=Vibrio parahaemolyticus serotype O3:K6 (strain AQ3810) GN=ligA PE=3 SV=1	0	168.29	40.597	22	50	22	1	670	73.921	5.35	High	High	High		0.745	0.98	110.1	82	107.9	23	23	23	3.715	0	162.445	22
FALSE	High	Master Protein	A6AY59	PrpE protein OS=Vibrio parahaemolyticus serotype O3:K6 (strain AQ3810) GN=A79_1070 PE=4 SV=1	0	167.265	44.16	23	69	23	1	625	69.577	5.34	High	High	High		1.352	1.034	88.6	119.8	91.6	24	24	24	13.03	0	194.775	23
FALSE	High	Master Protein	A6B6Q9	Phospho-2-dehydro-3-deoxyheptonate aldolase OS=Vibrio parahaemolyticus serotype O3:K6 (strain AQ3810) GN=A79_3352 PE=3 SV=1	0	166.599	46.2857	17	60	17	1	350	38.47	5.72	High	High	High		1.012	0.923	102.2	103.5	94.3	19	19	19	49.119	0	197.713	17
FALSE	High	Master Protein	A6B7J6	Histidine ammonia-lyase OS=Vibrio parahaemolyticus serotype O3:K6 (strain AQ3810) GN=hutH PE=3 SV=1	0	166.184	35.0294	14	53	14	1	511	55.001	5.69	High	High	High		1.04	1.081	96.1	100	103.9	18	18	18	9.857	0	196.328	14
FALSE	High	Master Protein	A6B773	UDP-3-O-acylglucosamine N-acyltransferase OS=Vibrio parahaemolyticus serotype O3:K6 (strain AQ3810) GN=lpxD PE=3 SV=1	0	165.621	48.9796	13	47	13	1	343	36.418	5.58	High	High	High		1.023	1.043	97.9	100.1	102	16	16	16	47.697	0	190.96	13
FALSE	High	Master Protein	A6B4K2	Aspartate-semialdehyde dehydrogenase OS=Vibrio parahaemolyticus serotype O3:K6 (strain AQ3810) GN=asd PE=3 SV=1	0	165.429	63.0319	15	41	15	1	376	40.767	5.36	High	High	High		0.519	0.914	123.3	64	112.7	17	17	17	13.454	0	159.284	15
FALSE	High	Master Protein	A6B6M6	UDP-N-acetylglucosamine 1-carboxyvinyltransferase OS=Vibrio parahaemolyticus serotype O3:K6 (strain AQ3810) GN=murA PE=3 SV=1	0	164.71	60.7656	17	47	17	1	418	44.082	5.34	High	High	High		0.861	1.146	99.7	85.9	114.4	17	17	17	12.503	0	166.153	17
FALSE	High	Master Protein	A6B9B3	ABC-type multidrug efflux pump OS=Vibrio parahaemolyticus serotype O3:K6 (strain AQ3810) GN=A79_0807 PE=4 SV=1	0	164.602	29.2208	15	47	14	1	616	68.445	6.02	High	High	High		1.3	0.919	93.2	121.2	85.6	17	17	17	10.602	1	178.57	15
FALSE	High	Master Protein	A6B2M5	Protein YhgF OS=Vibrio parahaemolyticus serotype O3:K6 (strain AQ3810) GN=A79_0066 PE=4 SV=1	0	164.515	30.1423	18	51	17	1	773	85.048	6.48	High	High	High		0.708	1.183	103.8	73.5	122.7	20	20	20	3.715	0	165.28	18
FALSE	High	Master Protein	A6B6Y1	Threonine--tRNA ligase OS=Vibrio parahaemolyticus serotype O3:K6 (strain AQ3810) GN=A79_1224 PE=3 SV=1	0	164.002	45.5072	17	63	17	1	345	39.741	6.28	High	High	High		0.961	1.077	98.8	94.9	106.3	24	24	24	73.057	0	178.675	17
FALSE	High	Master Protein	A6B021	FleQ protein OS=Vibrio parahaemolyticus serotype O3:K6 (strain AQ3810) GN=A79_2662 PE=4 SV=1	0	163.456	50.2049	20	46	20	1	488	54.343	5.15	High	High	High		1.399	0.979	88.8	124.3	86.9	21	21	21	11.798	0	161.453	20
FALSE	High	Master Protein	A6B139	Uncharacterized protein OS=Vibrio parahaemolyticus serotype O3:K6 (strain AQ3810) GN=A79_6103 PE=4 SV=1	0	163.069	65.3061	10	78	10	1	196	21.813	5.16	High	High	High		1.46	1.091	84.5	123.3	92.2	14	14	14	283.804	0	332.791	10
FALSE	High	Master Protein	A6B9M6	50S ribosomal protein L4 OS=Vibrio parahaemolyticus serotype O3:K6 (strain AQ3810) GN=rplD PE=3 SV=1	0	163.023	65.5	11	78	11	1	200	21.875	9.42	High	High	High		0.478	0.998	121.2	57.9	120.9	12	12	12	150.991	0	356.516	11
FALSE	High	Master Protein	A6B911	Fatty oxidation complex alpha subunit (Fragment) OS=Vibrio parahaemolyticus serotype O3:K6 (strain AQ3810) GN=A79_3383 PE=4 SV=1	0	162.981	53.5411	15	54	6	1	353	37.779	5.8	High	High	High		1.492	1.181	81.7	121.8	96.5	8	8	8	34.112	0	197.096	15
FALSE	High	Master Protein	A6B9C8	Malic enzyme OS=Vibrio parahaemolyticus serotype O3:K6 (strain AQ3810) GN=A79_1112 PE=4 SV=1	0	162.945	62.1176	19	77	19	1	425	46.135	5.05	High	High	High		0.573	0.92	120.3	68.9	110.7	23	23	23	18.783	0	236.807	19
FALSE	High	Master Protein	A6B827	Universal stress protein UspA (Fragment) OS=Vibrio parahaemolyticus serotype O3:K6 (strain AQ3810) GN=A79_3553 PE=4 SV=1	0	162.875	42.803	9	55	9	1	264	29.524	5.59	High	High	High		1.521	1.002	85.2	129.5	85.3	12	12	12	82.768	0	228.439	9
FALSE	High	Master Protein	A6B916	Acetyl-coenzyme A carboxylase carboxyl transferase subunit beta OS=Vibrio parahaemolyticus serotype O3:K6 (strain AQ3810) GN=accD PE=3 SV=1	0	162.824	44.8052	17	71	17	1	308	34.008	6.43	High	High	High		0.961	0.995	101.5	97.5	101	19	19	19	30.623	0	255.167	17
FALSE	High	Master Protein	A6B137	UPF0227 protein A79_6101 OS=Vibrio parahaemolyticus serotype O3:K6 (strain AQ3810) GN=A79_6101 PE=3 SV=1	0	161.798	76.5363	12	60	12	1	179	20.729	6.21	High	High	High		1.059	0.813	104.4	110.6	84.9	16	16	16	162.789	0	206.215	12
FALSE	High	Master Protein	A6B0U2	ATPase RavA OS=Vibrio parahaemolyticus serotype O3:K6 (strain AQ3810) GN=A79_3518 PE=4 SV=1	0	161.611	49.7288	21	49	21	1	553	63.079	5.57	High	High	High		1.197	0.827	99.2	118.8	82	24	24	24	9.746	0	184.614	21
FALSE	High	Master Protein	A6B9R1	Aerobic respiration control sensor protein ArcB (Fragment) OS=Vibrio parahaemolyticus serotype O3:K6 (strain AQ3810) GN=A79_4626 PE=4 SV=1	0	161.388	40.41	24	55	24	1	683	77.547	4.78	High	High	High		1.213	0.953	94.8	114.9	90.3	25	25	25	6.848	0	169.606	24
FALSE	High	Master Protein	A6AY01	Aldehyde dehydrogenase (NAD) family protein OS=Vibrio parahaemolyticus serotype O3:K6 (strain AQ3810) GN=A79_1012 PE=3 SV=1	0	161.153	46.8379	16	37	16	1	506	55.651	5.21	High	High	High		1.045	1.256	90.9	95	114.2	21	21	21	9	0	145.23	16
FALSE	High	Master Protein	A6B711	Cytochrome c oxidase, Cbb3-type, subunit II OS=Vibrio parahaemolyticus serotype O3:K6 (strain AQ3810) GN=ccoO PE=4 SV=1	0	161.057	63.1068	11	87	11	1	206	23.593	5.6	High	High	High		1.425	0.924	89.6	127.7	82.7	18	18	18	586.802	0	258.111	11
FALSE	High	Master Protein	A6B7G3	Glucose-6-phosphate isomerase OS=Vibrio parahaemolyticus serotype O3:K6 (strain AQ3810) GN=pgi PE=3 SV=1	0	160.862	39.4545	16	51	16	1	550	60.874	5.5	High	High	High		0.806	1.302	96.5	77.8	125.7	17	17	17	11.798	0	196.843	16
FALSE	High	Master Protein	A6B194	Outer membrane protein N, non-specific porin OS=Vibrio parahaemolyticus serotype O3:K6 (strain AQ3810) GN=A79_1877 PE=4 SV=1	0	160.86	46.9914	10	48	10	1	349	37.755	4.68	High	High	High		1.409	1.239	82.3	115.9	101.9	14	14	14	69.17	0	185.009	10
FALSE	High	Master Protein	A6B945	Transcriptional regulator HexR OS=Vibrio parahaemolyticus serotype O3:K6 (strain AQ3810) GN=hexR PE=4 SV=1	0	160.331	57.8397	14	72	14	1	287	31.888	7.74	High	High	High		1.346	0.985	90	121.2	88.7	20	20	20	67.129	0	241.181	14
FALSE	High	Master Protein	A6AYW8	4-hydroxyphenylpyruvate dioxygenase OS=Vibrio parahaemolyticus serotype O3:K6 (strain AQ3810) GN=hppD PE=3 SV=1	0	159.398	49.5798	18	68	18	1	357	40.38	4.81	High	High	High		1.289	1.125	87.9	113.2	98.9	23	23	23	30.623	0	218.521	18
FALSE	High	Master Protein	A6BA56	Exoribonuclease II (Fragment) OS=Vibrio parahaemolyticus serotype O3:K6 (strain AQ3810) GN=A79_4908 PE=4 SV=1	0	158.984	70	16	52	1	1	280	31.739	4.98	High	High	High		1.107	0.953	98	108.5	93.4	1	1	1	73.989	0	184.506	16
FALSE	High	Master Protein	A6B434	Histidine kinase OS=Vibrio parahaemolyticus serotype O3:K6 (strain AQ3810) GN=A79_5358 PE=4 SV=1	0	158.926	35.6383	31	39	30	1	1128	127.269	5.71	High	High	High		1.089	0.906	100.2	109.1	90.8	33	33	33	2.437	1	128.552	31
FALSE	High	Master Protein	A6B4D9	ParB family protein OS=Vibrio parahaemolyticus serotype O3:K6 (strain AQ3810) GN=A79_3294 PE=3 SV=1	0	158.089	69.9659	14	35	14	1	293	32.285	6.95	High	High	High		0.687	0.994	111.9	76.9	111.2	16	16	16	23.484	0	142.021	14
FALSE	High	Master Protein	A6B7U7	Paraquat-inducible protein B OS=Vibrio parahaemolyticus serotype O3:K6 (strain AQ3810) GN=A79_2267 PE=4 SV=1	0	157.436	49.2701	23	54	23	1	548	61.529	5.27	High	High	High		1.33	0.99	90.4	120.2	89.4	24	24	24	13.175	0	171.188	23
FALSE	High	Master Protein	A6B2P4	Sulfate adenylyltransferase subunit 1 OS=Vibrio parahaemolyticus serotype O3:K6 (strain AQ3810) GN=cysN PE=3 SV=1	0	157.379	38.2353	15	36	15	1	476	52.562	5.03	High	High	High		0.651	1.035	111.7	72.7	115.6	15	15	15	5.31	0	141.795	15
FALSE	High	Master Protein	A6B4W6	DNA polymerase III tau subunit OS=Vibrio parahaemolyticus serotype O3:K6 (strain AQ3810) GN=A79_3052 PE=4 SV=1	0	157.002	36.4276	23	57	23	1	711	78.55	6.21	High	High	High		1.002	1.001	99.9	100.1	100	25	25	25	7.938	0	167.522	23
FALSE	High	Master Protein	A6B662	Tryptophan synthase beta chain OS=Vibrio parahaemolyticus serotype O3:K6 (strain AQ3810) GN=trpB PE=3 SV=1	0	156.478	49.14	14	38	14	1	407	44.208	5.57	High	High	High		1.155	0.915	97.7	112.9	89.4	16	16	16	24.119	0	139.221	14
FALSE	High	Master Protein	A6B3N0	Methyl-accepting chemotaxis protein OS=Vibrio parahaemolyticus serotype O3:K6 (strain AQ3810) GN=A79_0670 PE=4 SV=1	0	156.226	40.1447	16	49	15	1	553	60.478	4.84	High	High	High		1.136	0.906	98.6	112	89.4	19	19	19	8.237	0	175.082	16
FALSE	High	Master Protein	A6AZB7	D-ribose-binding periplasmic protein OS=Vibrio parahaemolyticus serotype O3:K6 (strain AQ3810) GN=A79_4530 PE=4 SV=1	0	156.163	65.7534	11	38	11	1	292	30.658	5.05	High	High	High		0.515	1.11	114.3	58.8	126.8	12	12	12	28.286	0	177.379	11
FALSE	High	Master Protein	A6B368	Collagenase PrtC OS=Vibrio parahaemolyticus serotype O3:K6 (strain AQ3810) GN=A79_0795 PE=4 SV=1	0	155.048	52.1459	18	47	18	1	466	52.59	5.58	High	High	High		0.768	1.097	104.7	80.4	114.9	18	18	18	9	0	167.05	18
FALSE	High	Master Protein	A6B4D6	tRNA uridine 5-carboxymethylaminomethyl modification enzyme MnmG OS=Vibrio parahaemolyticus serotype O3:K6 (strain AQ3810) GN=mnmG PE=3 SV=1	0	154.341	38.8273	20	40	20	1	631	70.113	6.58	High	High	High		0.958	0.981	102.1	97.8	100.1	21	21	21	7.058	0	147.597	20
FALSE	High	Master Protein	A6AYY5	D-amino acid dehydrogenase, small subunit OS=Vibrio parahaemolyticus serotype O3:K6 (strain AQ3810) GN=A79_6216 PE=4 SV=1	0	154.243	40.9091	16	67	16	1	418	45.842	8.22	High	High	High		1.22	0.827	98.5	120.1	81.4	18	18	18	18.573	0	220.342	16
FALSE	High	Master Protein	A6B7I3	Glutamate-ammonia-ligase adenylyltransferase OS=Vibrio parahaemolyticus serotype O3:K6 (strain AQ3810) GN=glnE PE=3 SV=1	0	153.494	37.8036	26	53	26	1	947	109.125	5.64	High	High	High		0.982	0.958	102	100.2	97.8	27	27	27	3.711	0	158.431	26
FALSE	High	Master Protein	A6B6U6	ATP-dependent RNA helicase SrmB OS=Vibrio parahaemolyticus serotype O3:K6 (strain AQ3810) GN=srmB PE=3 SV=1	0	152.907	44.4717	13	40	13	1	407	46.284	9.52	High	High	High		0.957	1.01	101.1	96.8	102.1	16	16	16	11.115	0	160.773	13
FALSE	High	Master Protein	A6B121	UPF0229 protein A79_6085 OS=Vibrio parahaemolyticus serotype O3:K6 (strain AQ3810) GN=A79_6085 PE=3 SV=1	0	152.271	55.6845	21	56	20	1	431	49.906	6.49	High	High	High		1.333	1.097	87.5	116.6	96	21	21	21	17.588	0	176.561	21
FALSE	High	Master Protein	A6B933	ATP synthase subunit delta OS=Vibrio parahaemolyticus serotype O3:K6 (strain AQ3810) GN=atpH PE=3 SV=1	0	151.955	73.4463	8	66	8	1	177	19.417	4.77	High	High	High		0.89	1.114	99.9	88.9	111.3	9	9	9	99	0	259.217	8
FALSE	High	Master Protein	A6B0W4	1,4-alpha-glucan branching enzyme GlgB OS=Vibrio parahaemolyticus serotype O3:K6 (strain AQ3810) GN=glgB PE=3 SV=1	0	151.567	30.7798	20	53	20	1	731	84.528	6.06	High	High	High		1.046	0.981	99.1	103.7	97.2	23	23	23	8.441	0	155.873	20
FALSE	High	Master Protein	A6B6J1	Uncharacterized protein OS=Vibrio parahaemolyticus serotype O3:K6 (strain AQ3810) GN=A79_5480 PE=4 SV=1	0	151.554	54.8117	13	61	13	1	239	26.948	8.43	High	High	High		1.807	0.944	80	144.5	75.5	21	21	21	162.789	0	178.58	13
FALSE	High	Master Protein	A6B2R8	Transporter OS=Vibrio parahaemolyticus serotype O3:K6 (strain AQ3810) GN=A79_0852 PE=4 SV=1	0	150.289	20.0233	14	59	14	1	859	92.407	5.96	High	High	High		1.447	1.109	84.4	122.1	93.6	18	18	18	6.627	0	219.875	14
FALSE	High	Master Protein	A6B385	Acyl-CoA synthetase OS=Vibrio parahaemolyticus serotype O3:K6 (strain AQ3810) GN=A79_0234 PE=4 SV=1	0	150.141	29.7605	18	38	18	1	877	96.262	6.33	High	High	High		1.277	0.902	94.4	120.5	85.1	20	20	20	2.652	0	152.899	18
FALSE	High	Master Protein	A6B4T5	Membrane-fusion protein OS=Vibrio parahaemolyticus serotype O3:K6 (strain AQ3810) GN=A79_6294 PE=3 SV=1	0	149.628	62.2283	16	55	16	1	368	40.421	5.85	High	High	High		1.138	1.126	91.9	104.6	103.5	19	19	19	34.481	0	192.212	16
FALSE	High	Master Protein	A6B122	Stage V sporulation protein R OS=Vibrio parahaemolyticus serotype O3:K6 (strain AQ3810) GN=A79_6086 PE=4 SV=1	0	149.602	36.9942	18	59	18	1	519	61.263	5.72	High	High	High		1.215	1.099	90.5	110	99.5	21	21	21	15.379	0	173.708	18
FALSE	High	Master Protein	A6B3R3	tRNA-specific 2-thiouridylase MnmA OS=Vibrio parahaemolyticus serotype O3:K6 (strain AQ3810) GN=trmU PE=3 SV=1	0	149.31	67.3797	17	38	8	1	374	42.172	5.24	High	High	High		0.764	1.086	105.2	80.4	114.3	18	18	18	13.925	10	152.957	17
FALSE	High	Master Protein	A6B1G7	Membrane-fusion protein OS=Vibrio parahaemolyticus serotype O3:K6 (strain AQ3810) GN=A79_0171 PE=3 SV=1	0	149.177	59.7668	16	52	16	1	343	37.898	5.49	High	High	High		1.341	0.922	91.9	123.3	84.7	18	18	18	23.041	0	172.764	16
FALSE	High	Master Protein	A6B7S5	CheV OS=Vibrio parahaemolyticus serotype O3:K6 (strain AQ3810) GN=A79_3964 PE=4 SV=1	0	147.88	58.4416	15	57	15	1	308	34.105	5.24	High	High	High		1.143	0.983	96	109.7	94.3	16	16	16	28.764	0	209.332	15
FALSE	High	Master Protein	A6B5D1	Pts system, glucose-specific iibc component OS=Vibrio parahaemolyticus serotype O3:K6 (strain AQ3810) GN=ptsG PE=4 SV=1	0	147.796	21.0084	9	53	9	1	476	49.407	6.38	High	High	High		1.528	1.227	79.9	122.1	98	12	12	12	82.768	0	233.118	9
FALSE	High	Master Protein	A6B5C3	CheV OS=Vibrio parahaemolyticus serotype O3:K6 (strain AQ3810) GN=A79_1708 PE=4 SV=1	0	147.364	61.1987	15	40	15	1	317	35.434	5.06	High	High	High		0.957	0.863	106.4	101.8	91.8	17	17	17	13.678	0	131.758	15
FALSE	High	Master Protein	A6B4W0	Amidophosphoribosyltransferase OS=Vibrio parahaemolyticus serotype O3:K6 (strain AQ3810) GN=purF PE=3 SV=1	0	147.112	38.6905	17	51	17	1	504	56.01	5.87	High	High	High		0.982	1.142	96	94.3	109.7	19	19	19	13.251	0	176.7	17
FALSE	High	Master Protein	A6B757	YmcA OS=Vibrio parahaemolyticus serotype O3:K6 (strain AQ3810) GN=A79_5887 PE=4 SV=1	0	146.987	29.0984	16	34	16	1	732	83.033	4.73	High	High	High		0.961	1.071	98.9	95.1	106	18	18	18	4.436	0	134.475	16
FALSE	High	Master Protein	A6B4G2	Glycogen synthase OS=Vibrio parahaemolyticus serotype O3:K6 (strain AQ3810) GN=glgA PE=3 SV=1	0	146.578	43.8134	16	38	16	1	493	55.079	5.27	High	High	High		1.069	1.004	97.6	104.4	98	19	19	19	10.938	0	139.951	16
FALSE	High	Master Protein	A6B7F5	Sulfite reductase [NADPH] flavoprotein alpha-component OS=Vibrio parahaemolyticus serotype O3:K6 (strain AQ3810) GN=cysJ PE=3 SV=1	0	146.228	34.3499	16	42	16	1	623	68.744	5.06	High	High	High		0.963	0.944	103.2	99.4	97.4	20	20	20	8.284	0	148.755	16
FALSE	High	Master Protein	A6B3H5	Sigma-54 interaction domain family OS=Vibrio parahaemolyticus serotype O3:K6 (strain AQ3810) GN=A79_1197 PE=4 SV=1	0	146.075	53.1049	20	40	18	1	467	52.141	6.33	High	High	High		0.98	0.944	102.6	100.5	96.9	18	18	18	8.284	0	130.734	20
FALSE	High	Master Protein	A6AX42	MoxR protein OS=Vibrio parahaemolyticus serotype O3:K6 (strain AQ3810) GN=A79_0482 PE=4 SV=1	0	145.927	63.522	12	36	12	1	318	35.463	5.25	High	High	High		1.136	0.962	96.8	110	93.1	16	16	16	17.957	0	164.858	12
FALSE	High	Master Protein	A6AX91	Maltose/maltodextrin import ATP-binding protein MalK OS=Vibrio parahaemolyticus serotype O3:K6 (strain AQ3810) GN=malK PE=3 SV=1	0	145.732	54.3011	15	42	15	1	372	41.131	5.82	High	High	High		0.905	1.164	97.7	88.5	113.8	18	18	18	18.953	0	162.046	15
FALSE	High	Master Protein	A6B347	Queuine tRNA-ribosyltransferase OS=Vibrio parahaemolyticus serotype O3:K6 (strain AQ3810) GN=tgt PE=3 SV=1	0	145.484	50.1326	16	42	16	1	377	42.999	7.39	High	High	High		0.897	0.969	104.7	93.9	101.4	23	23	23	15.156	0	155.138	16
FALSE	High	Master Protein	A6AZ06	Succinylglutamate desuccinylase OS=Vibrio parahaemolyticus serotype O3:K6 (strain AQ3810) GN=astE PE=3 SV=1	0	145.345	57.0175	17	67	17	1	342	38.783	5.64	High	High	High		1.108	0.918	99.1	109.8	91	20	20	20	55.234	0	215.575	17
FALSE	High	Master Protein	A6B3K0	Secretion protein, HlyD family OS=Vibrio parahaemolyticus serotype O3:K6 (strain AQ3810) GN=A79_2497 PE=4 SV=1	0	145.067	53.1317	20	47	20	1	463	52.019	5.2	High	High	High		1.148	0.925	97.7	112.1	90.3	20	20	20	11.798	0	155.985	20
FALSE	High	Master Protein	A6B2Z9	1,4-dihydroxy-2-naphthoyl-CoA synthase OS=Vibrio parahaemolyticus serotype O3:K6 (strain AQ3810) GN=menB PE=3 SV=1	0	144.987	50	12	39	12	1	292	32.326	5.69	High	High	High		1.034	1.084	96.2	99.5	104.3	16	16	16	26.826	0	138.175	12
FALSE	High	Master Protein	A6B7J5	Urocanate hydratase OS=Vibrio parahaemolyticus serotype O3:K6 (strain AQ3810) GN=hutU PE=3 SV=1	0	144.902	38.5841	17	51	17	1	565	61.828	5.63	High	High	High		0.713	1.053	108.5	77.3	114.2	19	19	19	12.895	0	191.874	17
FALSE	High	Master Protein	A6B2W6	2,3-bisphosphoglycerate-independent phosphoglycerate mutase OS=Vibrio parahaemolyticus serotype O3:K6 (strain AQ3810) GN=gpmI PE=3 SV=1	0	144.841	39.8039	14	46	14	1	510	55.083	4.87	High	High	High		0.626	1.154	107.9	67.6	124.5	17	17	17	5.723	0	192.527	14
FALSE	High	Master Protein	A6B869	GTP pyrophosphokinase (ATP:GTP 3'-pyrophosphotransferase)(PpGpp synthetase I) ((P)ppGpp synthetase) (Fragment) OS=Vibrio parahaemolyticus serotype O3:K6 (strain AQ3810) GN=A79_1636 PE=4 SV=1	0	144.838	44.0994	20	56	20	1	483	54.932	6.34	High	High	High		1.014	1.007	99.3	100.7	100	21	21	21	9.746	0	177.822	20
FALSE	High	Master Protein	A6B1G4	Phage shock protein A OS=Vibrio parahaemolyticus serotype O3:K6 (strain AQ3810) GN=pspA PE=4 SV=1	0	144.75	65.4709	16	37	16	1	223	25.338	5.26	High	High	High		0.83	0.978	106.8	88.6	104.5	17	17	17	30.623	0	132.695	16
FALSE	High	Master Protein	A6B7R2	Tryptophan synthase beta chain OS=Vibrio parahaemolyticus serotype O3:K6 (strain AQ3810) GN=trpB PE=3 SV=1	0	142.813	51.5152	17	43	17	1	396	43	5.67	High	High	High		1.005	1.026	99	99.4	101.6	18	18	18	23.041	0	149.264	17
FALSE	High	Master Protein	A6B9X8	Serine hydroxymethyltransferase OS=Vibrio parahaemolyticus serotype O3:K6 (strain AQ3810) GN=glyA PE=3 SV=1	0	142.391	68.5185	14	59	14	1	216	23.124	7.53	High	High	High		1.175	1.122	91	106.9	102.1	19	19	19	192.07	0	201.026	14
FALSE	High	Master Protein	A6B6C1	Twitching mobility protein OS=Vibrio parahaemolyticus serotype O3:K6 (strain AQ3810) GN=A79_3010 PE=4 SV=1	0	141.777	55.2023	17	53	17	1	346	38.538	6.54	High	High	High		1.102	1.046	95.3	105	99.7	17	17	17	14.571	0	176.608	17
FALSE	High	Master Protein	A6B8G5	Msha biogenesis protein mshl OS=Vibrio parahaemolyticus serotype O3:K6 (strain AQ3810) GN=A79_4669 PE=4 SV=1	0	141.654	29.2505	15	42	15	1	547	58.613	5.02	High	High	High		1.279	1.026	90.8	116.1	93.1	15	15	15	13.454	0	138.899	15
FALSE	High	Master Protein	A6B9H8	Ubiquinol-Cytochrome c reductase, cytochrome c1 OS=Vibrio parahaemolyticus serotype O3:K6 (strain AQ3810) GN=A79_5879 PE=4 SV=1	0	141.491	56.9767	7	63	7	1	172	19.196	5.02	High	High	High		1.55	1.012	84.2	130.6	85.2	11	11	11	773.264	0	243.321	7
FALSE	High	Master Protein	A6AY55	2-methylisocitrate lyase OS=Vibrio parahaemolyticus serotype O3:K6 (strain AQ3810) GN=prpB PE=3 SV=1	0	141.161	45.6376	9	37	9	1	298	32.522	5.2	High	High	High		1.168	0.939	96.5	112.8	90.7	13	13	13	15.681	0	150.613	9
FALSE	High	Master Protein	A6B0U0	Low specificity L-threonine aldolase OS=Vibrio parahaemolyticus serotype O3:K6 (strain AQ3810) GN=A79_3516 PE=4 SV=1	0	140.93	54.1787	13	46	13	1	347	37.624	6.01	High	High	High		1.175	1.127	90.9	106.8	102.4	15	15	15	14.849	0	180.183	13
FALSE	High	Master Protein	A6B5B1	Coproporphyrinogen-III oxidase OS=Vibrio parahaemolyticus serotype O3:K6 (strain AQ3810) GN=hemN PE=3 SV=1	0	140.433	35.2052	17	48	17	1	463	53.64	6.27	High	High	High		0.965	0.937	103.4	99.7	96.9	20	20	20	9.826	0	157.913	17
FALSE	High	Master Protein	A6B4K6	Nucleoid-associated protein A79_5062 OS=Vibrio parahaemolyticus serotype O3:K6 (strain AQ3810) GN=A79_5062 PE=3 SV=1	0	140.255	64.4578	17	36	17	1	332	37.77	4.79	High	High	High		0.999	0.993	100.3	100.2	99.6	20	20	20	28.764	0	134.645	17
FALSE	High	Master Protein	A6B4A0	CytoChrome c-type protein TorY OS=Vibrio parahaemolyticus serotype O3:K6 (strain AQ3810) GN=A79_0099 PE=4 SV=1	0	139.939	34.0659	11	58	11	1	364	40.344	5.3	High	High	High		1.345	1.123	86.5	116.4	97.1	17	17	17	19.806	0	184.67	11
FALSE	High	Master Protein	A6AZM6	D-lactate dehydrogenase OS=Vibrio parahaemolyticus serotype O3:K6 (strain AQ3810) GN=A79_3096 PE=4 SV=1	0	139.846	53.3451	25	43	25	1	568	64.277	6.42	High	High	High		0.812	0.894	110.9	90	99.1	28	28	28	9	0	126.805	25
FALSE	High	Master Protein	A6AZ43	GMP reductase OS=Vibrio parahaemolyticus serotype O3:K6 (strain AQ3810) GN=guaC PE=3 SV=1	0	138.653	64.6552	15	35	15	1	348	37.265	6.62	High	High	High		0.953	0.997	101.7	96.9	101.4	17	17	17	14.505	0	131.166	15
FALSE	High	Master Protein	A6B9B9	Phosphoserine aminotransferase OS=Vibrio parahaemolyticus serotype O3:K6 (strain AQ3810) GN=serC PE=3 SV=1	0	138.251	47.2527	13	34	13	1	364	40.175	4.94	High	High	High		0.793	1.063	105	83.3	111.7	15	15	15	12.335	0	124.071	13
FALSE	High	Master Protein	A6B430	Glutamate-1-semialdehyde 2,1-aminomutase OS=Vibrio parahaemolyticus serotype O3:K6 (strain AQ3810) GN=hemL PE=3 SV=1	0	138.176	48.0278	13	50	13	1	431	45.898	5.68	High	High	High		0.994	0.961	101.5	101	97.5	14	14	14	9	0	200.799	13
FALSE	High	Master Protein	A6B1G8	Membrane-fusion protein OS=Vibrio parahaemolyticus serotype O3:K6 (strain AQ3810) GN=A79_0172 PE=3 SV=1	0	138.098	57.0637	17	54	17	1	361	39.525	5.55	High	High	High		1.461	0.937	88.3	129	82.7	18	18	18	20.544	0	193.111	17
FALSE	High	Master Protein	A6B036	Succinyl-diaminopimelate desuccinylase OS=Vibrio parahaemolyticus serotype O3:K6 (strain AQ3810) GN=dapE PE=3 SV=1	0	138.081	42.8571	12	29	12	1	378	41.013	4.89	High	High	High		0.806	0.926	109.8	88.5	101.7	14	14	14	10.22	0	125.788	12
FALSE	High	Master Protein	A6AYR3	Uncharacterized protein OS=Vibrio parahaemolyticus serotype O3:K6 (strain AQ3810) GN=A79_6142 PE=4 SV=1	0	137.899	65.7143	13	60	13	1	210	23.097	4.92	High	High	High		1.114	1.091	93.6	104.3	102.1	15	15	15	99	0	195.747	13
FALSE	High	Master Protein	A6B4S7	Peptide ABC transporter, permease protein OS=Vibrio parahaemolyticus serotype O3:K6 (strain AQ3810) GN=A79_6281 PE=3 SV=1	0	137.866	31.3846	9	64	9	1	325	35.9	7.42	High	High	High		1.721	1.075	79	136	84.9	13	13	13	84.77	0	229.234	9
FALSE	High	Master Protein	A6B4E8	Putative alpha-L-glutamate ligase homolog OS=Vibrio parahaemolyticus serotype O3:K6 (strain AQ3810) GN=A79_0704 PE=4 SV=1	0	136.967	52.1739	14	44	14	1	322	35.054	8.76	High	High	High		0.963	0.953	102.9	99	98.1	16	16	16	23.041	0	145.485	14
FALSE	High	Master Protein	A6B2J9	Uncharacterized protein OS=Vibrio parahaemolyticus serotype O3:K6 (strain AQ3810) GN=A79_0040 PE=4 SV=1	0	136.591	69.0972	20	57	20	1	288	33.196	5.34	High	High	High		0.998	1.021	99.4	99.2	101.4	21	21	21	16.013	0	161.941	20
FALSE	High	Master Protein	A6B5U0	Bifunctional aspartokinase/homoserine dehydrogenase II (Akii-hdii) OS=Vibrio parahaemolyticus serotype O3:K6 (strain AQ3810) GN=A79_1352 PE=4 SV=1	0	136.329	30.5486	21	37	21	1	802	87.764	5.17	High	High	High		1.089	0.928	99.5	108.3	92.3	21	21	21	2.907	0	115.919	21
FALSE	High	Master Protein	A6B9M8	Phospholipid/glycerol acyltransferase (Fragment) OS=Vibrio parahaemolyticus serotype O3:K6 (strain AQ3810) GN=A79_3316 PE=4 SV=1	0	136.323	61.7564	18	33	18	1	353	40.163	6.29	High	High	High		0.889	1.068	101.5	90.2	108.4	21	21	21	17.738	0	111.439	18
FALSE	High	Master Protein	A6AZW0	NAD(P) transhydrogenase subunit beta OS=Vibrio parahaemolyticus serotype O3:K6 (strain AQ3810) GN=A79_3184 PE=3 SV=1	0	136.201	26.6376	10	45	10	1	458	48.614	5.14	High	High	High		1.314	1.221	84.8	111.5	103.6	12	12	12	50.795	0	172.147	10
FALSE	High	Master Protein	A6BBP4	30S ribosomal protein S6 OS=Vibrio parahaemolyticus serotype O3:K6 (strain AQ3810) GN=rpsF PE=3 SV=1	0	135.867	39.8438	5	48	5	1	128	14.787	6.55	High	High	High		0.565	1.082	113.4	64	122.6	9	9	9	176.828	0	256.97	5
FALSE	High	Master Protein	A6B185	Phosphomannomutase OS=Vibrio parahaemolyticus serotype O3:K6 (strain AQ3810) GN=A79_1868 PE=3 SV=1	0	135.712	39.7163	17	39	17	1	564	61.608	5.06	High	High	High		0.845	1.085	102.4	86.5	111.1	17	17	17	4.946	0	119.394	17
FALSE	High	Master Protein	A6B6C6	Ribosomal RNA small subunit methyltransferase E OS=Vibrio parahaemolyticus serotype O3:K6 (strain AQ3810) GN=A79_3015 PE=3 SV=1	0	135.284	64.1975	12	38	12	1	243	27.184	5.69	High	High	High		1.03	1.089	96.2	99.1	104.7	14	14	14	50.795	0	146.89	12
FALSE	High	Master Protein	A6B7Z9	Pseudouridine synthase OS=Vibrio parahaemolyticus serotype O3:K6 (strain AQ3810) GN=rluD PE=3 SV=1	0	134.723	57.8462	13	34	13	1	325	36.581	6.43	High	High	High		0.951	0.975	102.5	97.5	99.9	15	15	15	14.505	0	140.673	13
FALSE	High	Master Protein	A6B623	Outer membrane protein OS=Vibrio parahaemolyticus serotype O3:K6 (strain AQ3810) GN=A79_5748 PE=4 SV=1	0	134.252	49.5979	11	30	11	1	373	40.764	4.54	High	High	High		1.107	1.84	76	84.1	139.9	13	13	13	9	0	129.994	11
FALSE	High	Master Protein	A6B3S6	Imidazole glycerol phosphate synthase subunit HisF OS=Vibrio parahaemolyticus serotype O3:K6 (strain AQ3810) GN=hisF PE=3 SV=1	0	134.216	77.821	17	43	17	1	257	28.356	5.21	High	High	High		1.099	0.938	98.8	108.6	92.6	19	19	19	43.367	0	149.523	17
FALSE	High	Master Protein	A6AYN4	Sigma-54 interaction domain family OS=Vibrio parahaemolyticus serotype O3:K6 (strain AQ3810) GN=A79_6114 PE=4 SV=1	0	133.869	44.9416	22	45	20	1	514	57.367	5.99	High	High	High		0.966	0.883	105.3	101.7	93	22	22	22	9.826	2	143.395	22
FALSE	High	Master Protein	A6B9W4	Site-determining protein OS=Vibrio parahaemolyticus serotype O3:K6 (strain AQ3810) GN=minD PE=3 SV=1	0	133.478	64.8148	13	63	13	1	270	29.464	4.98	High	High	High		0.964	1.058	99.3	95.7	105.1	15	15	15	118.378	0	220.185	13
FALSE	High	Master Protein	A6B117	Pyruvate formate-lyase-activating enzyme OS=Vibrio parahaemolyticus serotype O3:K6 (strain AQ3810) GN=pflA PE=3 SV=1	0	133.22	65.8537	13	39	13	1	246	28.036	5.95	High	High	High		1.112	1.033	95.4	106.1	98.5	18	18	18	45.416	0	160.693	13
FALSE	High	Master Protein	A6B9N4	Phosphatidylserine decarboxylase OS=Vibrio parahaemolyticus serotype O3:K6 (strain AQ3810) GN=A79_5682 PE=4 SV=1	0	133.164	45.8333	10	40	10	1	288	33.469	5.03	High	High	High		1.558	0.889	87	135.6	77.4	13	13	13	48.239	0	157.91	10
FALSE	High	Master Protein	A6AZY3	CytoChrome c-type biogenesis protein CcmH OS=Vibrio parahaemolyticus serotype O3:K6 (strain AQ3810) GN=A79_2624 PE=4 SV=1	0	132.832	50.6173	18	40	18	1	405	45.013	4.81	High	High	High		1.077	1.025	96.7	104.2	99.1	21	21	21	10.86	0	129.766	18
FALSE	High	Master Protein	A6AZE7	Na(+)-translocating NADH-quinone reductase subunit C OS=Vibrio parahaemolyticus serotype O3:K6 (strain AQ3810) GN=nqrC PE=3 SV=1	0	132.528	37.931	12	76	12	1	261	27.673	6.01	High	High	High		1.33	1.039	89	118.4	92.6	15	15	15	116.877	0	274.821	12
FALSE	High	Master Protein	A6B219	Trk system potassium uptake protein TrkA (K(+)-uptake protein trkA) OS=Vibrio parahaemolyticus serotype O3:K6 (strain AQ3810) GN=A79_5205 PE=4 SV=1	0	132.244	44.5415	15	37	15	1	458	50.106	5.26	High	High	High		1.029	0.997	99.1	102	98.8	17	17	17	12.689	0	144.509	15
FALSE	High	Master Protein	A6B1E5	Transcriptional regulatory protein OS=Vibrio parahaemolyticus serotype O3:K6 (strain AQ3810) GN=A79_1435 PE=4 SV=1	0	132.063	36.1257	12	63	12	1	382	42.13	5.15	High	High	High		1.12	1.148	91.8	102.8	105.4	18	18	18	41.17	0	216.353	12
FALSE	High	Master Protein	A6B136	NADH dehydrogenase OS=Vibrio parahaemolyticus serotype O3:K6 (strain AQ3810) GN=A79_6100 PE=4 SV=1	0	132.02	45.4545	19	45	19	1	429	46.992	8.95	High	High	High		1.24	1.05	91.2	113.1	95.7	20	20	20	5.898	0	168.171	19
FALSE	High	Master Protein	A6B367	Recombination-associated protein RdgC OS=Vibrio parahaemolyticus serotype O3:K6 (strain AQ3810) GN=rdgC PE=3 SV=1	0	132.006	60.8553	18	47	18	1	304	34.302	5.52	High	High	High		0.901	1.129	99	89.2	111.8	19	19	19	13.678	0	154.557	18
FALSE	High	Master Protein	A6B454	5'-methylthioadenosine/S-adenosylhomocysteine nucleosidase OS=Vibrio parahaemolyticus serotype O3:K6 (strain AQ3810) GN=mtnN PE=3 SV=1	0	131.97	62.7706	12	48	12	1	231	24.732	4.67	High	High	High		1.059	1.017	97.5	103.3	99.2	17	17	17	99	0	171.52	12
FALSE	High	Master Protein	A6B4X7	Mechanosensitive ion channel OS=Vibrio parahaemolyticus serotype O3:K6 (strain AQ3810) GN=A79_3063 PE=4 SV=1	0	131.132	39.2453	20	43	20	1	530	59.83	5.78	High	High	High		1.237	0.991	92.9	115	92.1	20	20	20	8.211	0	149.555	20
FALSE	High	Master Protein	A6BA87	Exoribonuclease 2 (Fragment) OS=Vibrio parahaemolyticus serotype O3:K6 (strain AQ3810) GN=rnb PE=3 SV=1	0	130.651	42.2131	18	39	18	1	488	55.078	5.08	High	High	High		0.714	0.986	111.1	79.3	109.6	21	21	21	11.798	0	113.832	18
FALSE	High	Master Protein	A6B6N4	Arabinose 5-phosphate isomerase OS=Vibrio parahaemolyticus serotype O3:K6 (strain AQ3810) GN=A79_0020 PE=3 SV=1	0	130.157	52.6316	12	40	12	1	323	34.363	5.74	High	High	High		1.206	1.027	92.8	111.9	95.3	14	14	14	26.384	0	156.381	12
FALSE	High	Master Protein	A6B7Z1	Pseudouridine synthase OS=Vibrio parahaemolyticus serotype O3:K6 (strain AQ3810) GN=A79_3824 PE=3 SV=1	0	130.044	47.4359	14	46	14	1	312	35.974	9.98	High	High	High		1.013	0.902	102.9	104.3	92.8	15	15	15	14.199	0	148.625	14
FALSE	High	Master Protein	A6B425	Cell division protein ZipA OS=Vibrio parahaemolyticus serotype O3:K6 (strain AQ3810) GN=zipA PE=3 SV=1	0	129.611	42.0886	12	37	12	1	316	35.269	4.51	High	High	High		0.99	1.005	100.2	99.2	100.6	15	15	15	38.811	0	137.323	12
FALSE	High	Master Protein	A6B8I2	CDP-diacylglycerol--serine O-phosphatidyltransferase OS=Vibrio parahaemolyticus serotype O3:K6 (strain AQ3810) GN=A79_6054 PE=3 SV=1	0	129.556	45.2915	17	48	17	1	446	51.052	8.92	High	High	High		0.966	0.974	102	98.6	99.4	19	19	19	9	0	152.431	17
FALSE	High	Master Protein	A6B154	Sigma cross-reacting protein 27A OS=Vibrio parahaemolyticus serotype O3:K6 (strain AQ3810) GN=A79_1837 PE=4 SV=1	0	129.226	66.2037	7	34	7	1	216	23.004	5.14	High	High	High		1.422	0.84	92	130.8	77.2	10	10	10	99	0	157.988	7
FALSE	High	Master Protein	A6B781	YhcX OS=Vibrio parahaemolyticus serotype O3:K6 (strain AQ3810) GN=A79_2170 PE=4 SV=1	0	129.151	41.5686	15	42	15	1	510	58.127	4.93	High	High	High		1.173	0.849	99.3	116.4	84.3	17	17	17	8.12	0	161.073	15
FALSE	High	Master Protein	A6AYJ0	Ribosome biogenesis GTPase A OS=Vibrio parahaemolyticus serotype O3:K6 (strain AQ3810) GN=A79_1587 PE=3 SV=1	0	128.75	49.0446	11	34	11	1	314	36.055	7.68	High	High	High		1.052	1.026	97.5	102.5	100	13	13	13	14.013	0	131.988	11
FALSE	High	Master Protein	A6B506	Glutamate--cysteine ligase OS=Vibrio parahaemolyticus serotype O3:K6 (strain AQ3810) GN=gshA PE=3 SV=1	0	127.744	34.0996	13	36	13	1	522	59.048	5.2	High	High	High		0.913	1.035	101.8	92.9	105.3	14	14	14	5.723	0	128.925	13
FALSE	High	Master Protein	A6B292	Molybdopterin biosynthesis MoeA protein OS=Vibrio parahaemolyticus serotype O3:K6 (strain AQ3810) GN=A79_5104 PE=4 SV=1	0	127.073	33.4459	16	40	16	1	592	64.593	5.22	High	High	High		1.005	1.1	96.6	97.1	106.3	17	17	17	5.494	0	129.13	16
FALSE	High	Master Protein	A6B8W6	tRNA-modifying protein YgfZ OS=Vibrio parahaemolyticus serotype O3:K6 (strain AQ3810) GN=A79_1808 PE=3 SV=1	0	127.013	51.8634	14	40	14	1	322	35.488	4.94	High	High	High		0.986	1.018	99.9	98.5	101.7	15	15	15	25.367	0	135.361	14
FALSE	High	Master Protein	A6B2J7	Orotate phosphoribosyltransferase OS=Vibrio parahaemolyticus serotype O3:K6 (strain AQ3810) GN=pyrE PE=3 SV=1	0	126.908	50.7042	9	45	9	1	213	23.175	5.22	High	High	High		0.707	0.954	112.7	79.7	107.5	11	11	11	45.416	0	189.837	9
FALSE	High	Master Protein	A6AY56	Citrate synthase OS=Vibrio parahaemolyticus serotype O3:K6 (strain AQ3810) GN=A79_1067 PE=3 SV=1	0	126.778	38.6842	11	36	11	1	380	42.525	6.1	High	High	High		1.366	0.998	89.2	121.8	89	14	14	14	6.586	0	133.32	11
FALSE	High	Master Protein	A6B896	Carbonic anhydrase OS=Vibrio parahaemolyticus serotype O3:K6 (strain AQ3810) GN=A79_0353 PE=3 SV=1	0	126.548	68.9189	11	48	11	1	222	25.206	5.8	High	High	High		0.704	0.838	118	83.1	98.9	13	13	13	69.17	0	169.361	11
FALSE	High	Master Protein	A6BBW9	Transcriptional repressor, LacI family (Fragment) OS=Vibrio parahaemolyticus serotype O3:K6 (strain AQ3810) GN=A79_3528 PE=4 SV=1	0	126.515	58.7234	9	35	9	1	235	25.779	6.92	High	High	High		1.007	0.975	100.6	101.3	98.1	13	13	13	45.416	0	147.211	9
FALSE	High	Master Protein	A6BA25	Ubiquinol-cytochrome c reductase iron-sulfur subunit (Fragment) OS=Vibrio parahaemolyticus serotype O3:K6 (strain AQ3810) GN=petA PE=4 SV=1	0	126.297	43.6782	10	46	10	1	174	19.596	5.6	High	High	High		1.295	0.959	92.2	119.4	88.4	14	14	14	82.768	0	170.776	10
FALSE	High	Master Protein	A6B5Y8	UDP-N-acetylmuramate--L-alanine ligase OS=Vibrio parahaemolyticus serotype O3:K6 (strain AQ3810) GN=murC PE=3 SV=1	0	126.222	27.0103	10	28	10	1	485	52.917	5.45	High	High	High		1.064	1.101	94.8	100.8	104.4	12	12	12	9	0	116.984	10
FALSE	High	Master Protein	A6B5G6	Putative RTX toxin OS=Vibrio parahaemolyticus serotype O3:K6 (strain AQ3810) GN=A79_3987 PE=4 SV=1	0	125.921	11.1169	18	31	18	1	3823	402.972	3.97	High	High	High		0.753	0.97	110.2	83	106.9	18	18	18	0.643	0	109.59	18
FALSE	High	Master Protein	A6B400	Protein mlc OS=Vibrio parahaemolyticus serotype O3:K6 (strain AQ3810) GN=A79_2282 PE=4 SV=1	0	125.887	46.2871	12	41	12	1	404	43.799	5.8	High	High	High		1.139	0.984	96.1	109.5	94.5	12	12	12	13.125	0	158.783	12
FALSE	High	Master Protein	A6AZX4	Insulin-degrading enzyme OS=Vibrio parahaemolyticus serotype O3:K6 (strain AQ3810) GN=A79_2615 PE=3 SV=1	0	125.65	27.3514	21	33	21	1	925	105.679	5.54	High	High	High		1.24	0.986	93	115.3	91.7	22	22	22	2.675	0	118.866	21
FALSE	High	Master Protein	A6AZZ6	Chemotaxis response regulator protein-glutamate methylesterase OS=Vibrio parahaemolyticus serotype O3:K6 (strain AQ3810) GN=cheB PE=3 SV=1	0	125.554	45.2575	13	41	13	1	369	39.374	9.31	High	High	High		1.175	0.993	94.7	111.3	94	15	15	15	12.689	0	134.427	13
FALSE	High	Master Protein	A6B9R4	PmbA protein OS=Vibrio parahaemolyticus serotype O3:K6 (strain AQ3810) GN=pmbA PE=4 SV=1	0	125.193	46.5324	15	32	15	1	447	48.284	5.17	High	High	High		0.991	1.04	99	98.1	102.9	19	19	19	6.11	0	114.98	15
FALSE	High	Master Protein	A6B8Q7	Fructose-1,6-bisphosphatase OS=Vibrio parahaemolyticus serotype O3:K6 (strain AQ3810) GN=glpX PE=3 SV=1	0	125.068	44.4776	13	34	13	1	335	35.944	5.08	High	High	High		0.982	1.038	99.3	97.6	103.1	15	15	15	9	0	122.719	13
FALSE	High	Master Protein	A6BBF2	Ribosomal protein S7 (Fragment) OS=Vibrio parahaemolyticus serotype O3:K6 (strain AQ3810) GN=rpsG PE=3 SV=1	0	124.965	65.3595	10	74	10	1	153	17.398	9.95	High	High	High		0.278	1.148	123.7	34.3	142	13	13	13	81.54	0	308.354	10
FALSE	High	Master Protein	A6B6K4	Phosphoribosylaminoimidazole-succinocarboxamide synthase OS=Vibrio parahaemolyticus serotype O3:K6 (strain AQ3810) GN=purC PE=3 SV=1	0	124.954	40.5995	12	42	12	1	367	41.031	5.16	High	High	High		1.168	1.074	92.6	108.1	99.4	14	14	14	8.085	0	143.769	12
FALSE	High	Master Protein	A6BAA9	Glyceraldehyde-3-phosphate dehydrogenase OS=Vibrio parahaemolyticus serotype O3:K6 (strain AQ3810) GN=A79_6299 PE=3 SV=1	0	124.82	76.8868	13	49	5	1	212	22.854	6.92	High	High	High		0.989	1.056	98.5	97.4	104.1	7	7	7	82.768	1	166.071	13
FALSE	High	Master Protein	A6B7I8	TldD protein OS=Vibrio parahaemolyticus serotype O3:K6 (strain AQ3810) GN=A79_2138 PE=4 SV=1	0	124.631	44.4906	17	30	17	1	481	51.326	5.17	High	High	High		0.85	0.999	105.3	89.5	105.2	20	20	20	6.88	0	100.723	17
FALSE	High	Master Protein	A6B995	Dihydroxy-acid dehydratase (Fragment) OS=Vibrio parahaemolyticus serotype O3:K6 (strain AQ3810) GN=ilvD PE=3 SV=1	0	124.616	36.2393	17	29	6	1	585	62.722	5.21	High	High	High		1.015	1.108	96.1	97.5	106.4	17	17	17	3.281	11	101.953	17
FALSE	High	Master Protein	A6B4J4	Chaperone protein HscA homolog OS=Vibrio parahaemolyticus serotype O3:K6 (strain AQ3810) GN=hscA PE=3 SV=1	0	124.5	36.1426	17	42	17	1	617	66.054	4.81	High	High	High		0.703	1.045	109.2	76.8	114.1	17	17	17	5.136	0	127.758	17
FALSE	High	Master Protein	A6B9M5	50S ribosomal protein L3 OS=Vibrio parahaemolyticus serotype O3:K6 (strain AQ3810) GN=rplC PE=3 SV=1	0	124.457	59.8086	11	97	11	1	209	22.36	9.7	High	High	High		0.529	1.084	114.8	60.7	124.5	12	12	12	28.286	0	400.691	11
FALSE	High	Master Protein	A6B4I4	Outer membrane protein assembly factor BamB OS=Vibrio parahaemolyticus serotype O3:K6 (strain AQ3810) GN=bamB PE=3 SV=1	0	124.342	47.4093	13	38	13	1	386	41.492	4.87	High	High	High		1.009	1.088	96.9	97.7	105.4	15	15	15	10.159	0	136.875	13
FALSE	High	Master Protein	A6B3R5	Inosine-guanosine kinase OS=Vibrio parahaemolyticus serotype O3:K6 (strain AQ3810) GN=A79_3866 PE=4 SV=1	0	124.196	51.1521	19	38	19	1	434	48.447	5.73	High	High	High		0.889	0.999	103.9	92.4	103.7	21	21	21	6.943	0	126.425	19
FALSE	High	Master Protein	A6B039	Outer membrane protein assembly factor BamC OS=Vibrio parahaemolyticus serotype O3:K6 (strain AQ3810) GN=bamC PE=3 SV=1	0	124.042	45.7227	18	56	18	1	339	38.079	5.41	High	High	High		0.817	1.08	103.6	84.6	111.9	18	18	18	16.783	0	158.438	18
FALSE	High	Master Protein	A6B5V9	TPR-repeat-containing protein OS=Vibrio parahaemolyticus serotype O3:K6 (strain AQ3810) GN=A79_3570 PE=4 SV=1	0	123.848	36.3158	24	42	24	1	760	87.938	7.01	High	High	High		1.138	0.881	99.4	113.1	87.5	25	25	25	3.217	0	125.389	24
FALSE	High	Master Protein	A6AX69	Pts system, fructose-specific iiabc component OS=Vibrio parahaemolyticus serotype O3:K6 (strain AQ3810) GN=A79_0509 PE=4 SV=1	0	123.622	24.8819	14	35	14	1	635	65.585	5.16	High	High	High		0.69	0.936	114.3	78.9	106.9	15	15	15	11.743	0	137.533	14
FALSE	High	Master Protein	A6B9J3	Vitamin B12 transporter BtuB OS=Vibrio parahaemolyticus serotype O3:K6 (strain AQ3810) GN=btuB PE=3 SV=1	0	123.555	34.2949	17	35	17	1	624	69.274	5.12	High	High	High		0.946	1.136	97.3	92.1	110.6	18	18	18	3.541	0	126.284	17
FALSE	High	Master Protein	A6B363	Exopolyphosphatase OS=Vibrio parahaemolyticus serotype O3:K6 (strain AQ3810) GN=A79_0790 PE=3 SV=1	0	123.455	41.517	18	39	18	1	501	56.646	6.7	High	High	High		1.127	1.049	94.5	106.4	99.1	18	18	18	6.499	0	119.247	18
FALSE	High	Master Protein	A6B2Q6	Outer membrane protein OS=Vibrio parahaemolyticus serotype O3:K6 (strain AQ3810) GN=A79_0840 PE=4 SV=1	0	123.406	46.8421	19	38	19	1	570	63.789	5.62	High	High	High		1.143	0.969	96.4	110.2	93.4	21	21	21	5.391	0	118.407	19
FALSE	High	Master Protein	A6AZE3	FAD:protein FMN transferase OS=Vibrio parahaemolyticus serotype O3:K6 (strain AQ3810) GN=A79_4252 PE=3 SV=1	0	123.053	50.5988	13	39	13	1	334	36.797	5.07	High	High	High		0.982	1.122	96.6	94.9	108.4	16	16	16	14.505	0	127.472	13
FALSE	High	Master Protein	A6B636	DNA helicase OS=Vibrio parahaemolyticus serotype O3:K6 (strain AQ3810) GN=uvrD PE=3 SV=1	0	122.814	32.6418	18	33	17	1	723	82.209	5.69	High	High	High		0.955	0.932	103.9	99.2	96.9	17	17	17	2.495	0	105.123	18
FALSE	High	Master Protein	A6B3I4	Uncharacterized protein OS=Vibrio parahaemolyticus serotype O3:K6 (strain AQ3810) GN=A79_2481 PE=4 SV=1	0	122.515	44.7227	17	30	17	1	559	60.76	6.18	High	High	High		0.93	0.854	107.8	100.2	92	18	18	18	3.642	0	96.339	17
FALSE	High	Master Protein	A6AZ32	Molybdopterin biosynthesis protein MoeA OS=Vibrio parahaemolyticus serotype O3:K6 (strain AQ3810) GN=A79_4444 PE=4 SV=1	0	122.372	46.2287	12	31	12	1	411	44.351	5.11	High	High	High		1.085	0.998	97.3	105.6	97.1	13	13	13	13.125	0	121.041	12
FALSE	High	Master Protein	A6B4L5	Protease 4 OS=Vibrio parahaemolyticus serotype O3:K6 (strain AQ3810) GN=sppA PE=3 SV=1	0	122.087	28.7338	12	28	12	1	616	67.468	5.2	High	High	High		0.679	1.022	111.1	75.4	113.5	12	12	12	2.621	0	110.526	12
FALSE	High	Master Protein	A6B4F5	TorCAD operon transcriptional regulatory protein TorR OS=Vibrio parahaemolyticus serotype O3:K6 (strain AQ3810) GN=A79_0711 PE=4 SV=1	0	121.729	48.1013	10	38	10	1	237	26.746	5.3	High	High	High		0.984	0.993	100.8	99.2	100.1	14	14	14	22.714	0	138.66	10
FALSE	High	Master Protein	A6B3L5	Transcriptional regulator, LysR family OS=Vibrio parahaemolyticus serotype O3:K6 (strain AQ3810) GN=A79_0655 PE=4 SV=1	0	121.624	47.8261	13	36	13	1	299	33.658	5.57	High	High	High		1.026	1.105	95.8	98.3	105.9	15	15	15	15.238	0	119.754	13
FALSE	High	Master Protein	A6B4B6	Membrane protein insertase YidC OS=Vibrio parahaemolyticus serotype O3:K6 (strain AQ3810) GN=yidC PE=3 SV=1	0	121.335	24.8148	13	57	13	1	540	60.35	6.32	High	High	High		1.063	1.078	95.5	101.5	102.9	17	17	17	18.307	0	186.475	13
FALSE	High	Master Protein	A6B9B0	Magnesium transporter MgtE OS=Vibrio parahaemolyticus serotype O3:K6 (strain AQ3810) GN=mgtE PE=3 SV=1	0	121.262	44.7894	13	28	13	1	451	48.856	4.41	High	High	High		1.133	0.829	101.3	114.7	84	13	13	13	9	0	121.751	13
FALSE	High	Master Protein	A6B7Y7	Acetyl-coenzyme A carboxylase carboxyl transferase subunit alpha (Fragment) OS=Vibrio parahaemolyticus serotype O3:K6 (strain AQ3810) GN=A79_3373 PE=4 SV=1	0	120.74	49.4444	9	41	9	1	180	19.887	5.05	High	High	High		0.943	0.984	102.5	96.7	100.8	12	12	12	99	0	183.154	9
FALSE	High	Master Protein	A6B462	4-hydroxy-tetrahydrodipicolinate reductase OS=Vibrio parahaemolyticus serotype O3:K6 (strain AQ3810) GN=dapB PE=3 SV=1	0	120.649	54.6468	10	40	10	1	269	28.593	5.29	High	High	High		0.71	1.008	110.3	78.4	111.3	12	12	12	14.399	0	160.857	10
FALSE	High	Master Protein	A6B6T8	Dihydroorotate dehydrogenase (quinone) OS=Vibrio parahaemolyticus serotype O3:K6 (strain AQ3810) GN=pyrD PE=3 SV=1	0	120.561	49.1071	15	42	15	1	336	36.859	6.33	High	High	High		0.892	1.043	102.2	91.2	106.6	15	15	15	12.689	0	149.129	15
FALSE	High	Master Protein	A6B3I1	ParA family protein OS=Vibrio parahaemolyticus serotype O3:K6 (strain AQ3810) GN=A79_2478 PE=4 SV=1	0	120.456	41.3953	13	41	13	1	430	48.743	5.08	High	High	High		1.133	1.059	94	106.5	99.5	13	13	13	7.254	0	135.565	13
FALSE	High	Master Protein	A6B8S7	Response regulator OS=Vibrio parahaemolyticus serotype O3:K6 (strain AQ3810) GN=A79_0121 PE=4 SV=1	0	119.429	28.7926	12	23	12	1	646	72.581	5.95	High	High	High		1.359	0.916	91.6	124.5	83.9	16	16	16	3.217	0	95.3296	12
FALSE	High	Master Protein	A6B9Y7	Cold-shock deAd box protein a (Fragment) OS=Vibrio parahaemolyticus serotype O3:K6 (strain AQ3810) GN=A79_1908 PE=4 SV=1	0	119.392	36.1522	14	30	14	1	473	53.251	9.86	High	High	High		1	1.285	91.3	91.3	117.4	16	16	16	5.529	0	111.739	14
FALSE	High	Master Protein	A6B602	Glycine--tRNA ligase alpha subunit OS=Vibrio parahaemolyticus serotype O3:K6 (strain AQ3810) GN=glyQ PE=3 SV=1	0	119.333	33.1148	9	36	9	1	305	34.938	4.96	High	High	High		0.903	1.015	102.8	92.9	104.3	11	11	11	45.416	0	118.837	9
FALSE	High	Master Protein	A6B8R3	Aspartokinase (Fragment) OS=Vibrio parahaemolyticus serotype O3:K6 (strain AQ3810) GN=A79_3619 PE=3 SV=1	0	119.282	48.8372	13	41	5	1	344	37.604	5.54	High	High	High		1.189	1.113	90.8	108	101.1	15	15	15	16.302	10	135.755	13
FALSE	High	Master Protein	A6B9H0	50S ribosomal protein L6 OS=Vibrio parahaemolyticus serotype O3:K6 (strain AQ3810) GN=rplF PE=3 SV=1	0	119.218	67.2316	8	77	8	1	177	18.767	9.41	High	High	High		0.382	1.057	123	46.9	130.1	8	8	8	49.119	0	313.518	8
FALSE	High	Master Protein	A6AZ19	Phosphoribosylglycinamide formyltransferase 2 OS=Vibrio parahaemolyticus serotype O3:K6 (strain AQ3810) GN=purT PE=3 SV=1	0	119.18	49.1049	17	36	17	1	391	42.82	5.3	High	High	High		0.996	1.102	96.8	96.5	106.7	18	18	18	6.943	0	126.88	17
FALSE	High	Master Protein	A6B8C5	Msha biogenesis protein mshi (Fragment) OS=Vibrio parahaemolyticus serotype O3:K6 (strain AQ3810) GN=A79_6318 PE=4 SV=1	0	118.851	61.8519	11	31	2	1	270	30.265	5.36	High	High	High		1.166	0.877	98.6	115	86.5	2	2	2	16.783	0	138.983	11
FALSE	High	Master Protein	A6B8E7	Homocysteine synthase OS=Vibrio parahaemolyticus serotype O3:K6 (strain AQ3810) GN=A79_1657 PE=3 SV=1	0	118.535	29.8578	11	38	11	1	422	45.743	5.63	High	High	High		1.036	0.895	102.3	106	91.6	14	14	14	12.895	0	139.355	11
FALSE	High	Master Protein	A6AX62	TrkA-N domain protein OS=Vibrio parahaemolyticus serotype O3:K6 (strain AQ3810) GN=A79_0502 PE=4 SV=1	0	117.633	43.7788	5	37	5	1	217	23.841	6.09	High	High	High		2.419	0.86	70.1	169.6	60.3	8	8	8	78.433	0	154.653	5
FALSE	High	Master Protein	A6B8C2	Bifunctional protein GlmU OS=Vibrio parahaemolyticus serotype O3:K6 (strain AQ3810) GN=glmU PE=3 SV=1	0	117.284	43.7086	12	40	12	1	453	48.694	5.2	High	High	High		0.783	0.961	109.3	85.6	105	15	15	15	7.111	0	149.604	12
FALSE	High	Master Protein	A6BC19	Shikimate kinase OS=Vibrio parahaemolyticus serotype O3:K6 (strain AQ3810) GN=aroK PE=3 SV=1	0	116.989	69.8925	11	43	11	1	186	21.031	5.24	High	High	High		0.589	0.972	117.2	69	113.8	12	12	12	37.312	0	187.856	11
FALSE	High	Master Protein	A6B5H5	Long-chain fatty acid transport protein OS=Vibrio parahaemolyticus serotype O3:K6 (strain AQ3810) GN=A79_4399 PE=4 SV=1	0	116.884	31.2349	8	26	8	1	413	44.933	4.68	High	High	High		1.5	0.861	89.3	133.9	76.8	11	11	11	9	0	112.815	8
FALSE	High	Master Protein	A6B8A9	Lipopolysaccharide assembly protein B OS=Vibrio parahaemolyticus serotype O3:K6 (strain AQ3810) GN=lapB PE=3 SV=1	0	116.639	44.757	16	37	16	1	391	44.624	6.95	High	High	High		1.282	0.903	94.2	120.7	85.1	19	19	19	13.454	0	118.88	16
FALSE	High	Master Protein	A6B5H4	CHO cell elongating factor OS=Vibrio parahaemolyticus serotype O3:K6 (strain AQ3810) GN=A79_4398 PE=4 SV=1	0	116.546	20.8229	12	32	12	1	802	84.294	4.68	High	High	High		1.222	0.953	94.5	115.5	90.1	14	14	14	5.21	0	113.375	12
FALSE	High	Master Protein	A6B461	Carbamoyl-phosphate synthase small chain OS=Vibrio parahaemolyticus serotype O3:K6 (strain AQ3810) GN=carA PE=3 SV=1	0	116.486	40.146	13	58	13	1	411	44.701	5.63	High	High	High		0.678	0.917	115.6	78.3	106	14	14	14	15.681	0	166.522	13
FALSE	High	Master Protein	A6B3I2	ParB family protein OS=Vibrio parahaemolyticus serotype O3:K6 (strain AQ3810) GN=A79_2479 PE=3 SV=1	0	116.085	51.2346	14	34	14	1	324	35.671	8.92	High	High	High		1.011	1.108	96.2	97.3	106.6	16	16	16	13.125	0	127.705	14
FALSE	High	Master Protein	A6AZX7	3-ketoacyl-CoA thiolase OS=Vibrio parahaemolyticus serotype O3:K6 (strain AQ3810) GN=fadI PE=3 SV=1	0	115.996	45.5172	17	39	16	1	435	46.333	7.18	High	High	High		1.497	0.958	86.8	130	83.2	19	19	19	7.432	1	122.076	17
FALSE	High	Master Protein	A6B527	Diaminopimelate decarboxylase OS=Vibrio parahaemolyticus serotype O3:K6 (strain AQ3810) GN=lysA PE=3 SV=1	0	115.936	54.1966	17	33	17	1	417	45.861	5.15	High	High	High		0.723	1.109	105.9	76.6	117.5	17	17	17	6.017	0	115.365	17
FALSE	High	Master Protein	A6B770	Lipid-A-disaccharide synthase OS=Vibrio parahaemolyticus serotype O3:K6 (strain AQ3810) GN=lpxB PE=3 SV=1	0	115.865	49.3404	15	39	15	1	379	42.706	6.35	High	High	High		1.012	0.966	100.7	101.9	97.3	16	16	16	9	0	139.188	15
FALSE	High	Master Protein	A6B9K5	Uncharacterized protein OS=Vibrio parahaemolyticus serotype O3:K6 (strain AQ3810) GN=A79_1205 PE=4 SV=1	0	115.847	65.9864	11	52	11	1	147	16.526	4.98	High	High	High		1.394	0.844	92.7	129.2	78.2	15	15	15	350.119	0	185.796	11
FALSE	High	Master Protein	A6B9C6	Elongation factor Tu (Fragment) OS=Vibrio parahaemolyticus serotype O3:K6 (strain AQ3810) GN=A79_1110 PE=4 SV=1	0	115.658	70.2703	10	166	2	1	148	16.214	5.63	High	High	High		0.851	1.037	103.9	88.4	107.7	2	2	2	598.484	0	451.295	10
FALSE	High	Master Protein	A6AWY7	L-threonine 3-dehydrogenase OS=Vibrio parahaemolyticus serotype O3:K6 (strain AQ3810) GN=tdh PE=3 SV=1	0	115.648	52.7697	12	36	12	1	343	37.634	5.44	High	High	High		0.682	1.038	110.3	75.2	114.5	15	15	15	22.714	0	142.091	12
FALSE	High	Master Protein	A6B5B9	Oxidoreductase, short chain dehydrogenase/reductase family OS=Vibrio parahaemolyticus serotype O3:K6 (strain AQ3810) GN=A79_1704 PE=3 SV=1	0	115.452	52.8226	9	31	9	1	248	26.994	5.47	High	High	High		0.724	0.996	110.3	79.9	109.8	14	14	14	33.551	0	122.833	9
FALSE	High	Master Protein	A6B4J0	Nucleoside diphosphate kinase OS=Vibrio parahaemolyticus serotype O3:K6 (strain AQ3810) GN=ndk PE=3 SV=1	0	115.254	72.3404	8	45	8	1	141	15.855	5.2	High	High	High		0.787	0.88	112.5	88.6	99	10	10	10	165.81	0	164.154	8
FALSE	High	Master Protein	A6B8K2	Glutathione-disulfide reductase (Fragment) OS=Vibrio parahaemolyticus serotype O3:K6 (strain AQ3810) GN=gor PE=3 SV=1	0	115.188	40.9326	9	32	3	1	386	41.792	5.54	High	High	High		0.69	1.098	107.6	74.2	118.2	12	12	12	12.111	9	133.072	9
FALSE	High	Master Protein	A6B2R0	Inorganic pyrophosphatase OS=Vibrio parahaemolyticus serotype O3:K6 (strain AQ3810) GN=ppa PE=3 SV=1	0	115.177	58.5227	11	64	11	1	176	19.632	4.96	High	High	High		0.957	1.079	98.8	94.6	106.6	14	14	14	145.78	0	212.012	11
FALSE	High	Master Protein	A6B806	Universal stress protein OS=Vibrio parahaemolyticus serotype O3:K6 (strain AQ3810) GN=A79_3604 PE=3 SV=1	0	114.763	94.3262	9	36	9	1	141	15.672	5.45	High	High	High		1.045	0.802	105.4	110.1	84.5	11	11	11	718.686	0	142.547	9
FALSE	High	Master Protein	A6BAN0	Ribonuclease R (Fragment) OS=Vibrio parahaemolyticus serotype O3:K6 (strain AQ3810) GN=A79_0690 PE=4 SV=1	0	114.462	50.9915	14	43	2	1	353	40.038	9.54	High	High	High		1.102	1.145	92.4	101.8	105.8	2	2	2	10.103	0	146.987	14
FALSE	High	Master Protein	A6B3Z8	Pts system, N-acetylglucosamine-specific iibc component OS=Vibrio parahaemolyticus serotype O3:K6 (strain AQ3810) GN=nagE PE=4 SV=1	0	114.337	24.283	10	35	10	1	523	54.543	6.86	High	High	High		1.7	1.257	75.8	128.9	95.3	12	12	12	24.119	0	123.998	10
FALSE	High	Master Protein	A6B5Y2	UDP-N-acetylmuramoyl-L-alanyl-D-glutamate--2,6-diaminopimelate ligase OS=Vibrio parahaemolyticus serotype O3:K6 (strain AQ3810) GN=murE PE=3 SV=1	0	114.217	34.8884	14	35	14	1	493	52.953	5.14	High	High	High		1.078	0.998	97.5	105.2	97.3	14	14	14	3.771	0	144.861	14
FALSE	High	Master Protein	A6B7W2	Erythronate-4-phosphate dehydrogenase OS=Vibrio parahaemolyticus serotype O3:K6 (strain AQ3810) GN=pdxB PE=3 SV=1	0	114.079	40.2913	11	21	11	1	412	45.437	5.34	High	High	High		0.948	1.027	100.8	95.6	103.6	12	12	12	5.19	0	94.98	11
FALSE	High	Master Protein	A6AY91	Multiphosphoryl transfer protein (MTP) (Phosphotransferase FPrprotein) (Pseudo-HPr) OS=Vibrio parahaemolyticus serotype O3:K6 (strain AQ3810) GN=A79_1487 PE=4 SV=1	0	114.049	40.1596	10	29	10	1	376	39.622	6	High	High	High		0.74	1.237	100.8	74.6	124.6	11	11	11	6.197	0	127.511	10
FALSE	High	Master Protein	A6BA92	Fructose-bisphosphate aldolase, class II (Fragment) OS=Vibrio parahaemolyticus serotype O3:K6 (strain AQ3810) GN=fbaA PE=3 SV=1	0	113.746	49.6324	9	60	9	1	272	29.974	4.7	High	High	High		0.594	1.153	109.2	64.9	125.9	12	12	12	42.288	0	218.939	9
FALSE	High	Master Protein	A6B1Y6	Transcriptional regulator OS=Vibrio parahaemolyticus serotype O3:K6 (strain AQ3810) GN=A79_5853 PE=4 SV=1	0	113.721	63.0769	15	35	15	1	260	29.656	5.24	High	High	High		0.735	0.875	115	84.5	100.6	18	18	18	13.125	0	129.083	15
FALSE	High	Master Protein	A6B5L0	Regulator of sigma D OS=Vibrio parahaemolyticus serotype O3:K6 (strain AQ3810) GN=A79_4008 PE=3 SV=1	0	113.713	95.0311	9	23	9	1	161	18.373	4.5	High	High	High		0.643	1.011	113	72.7	114.3	13	13	13	128.155	0	88.6262	9
FALSE	High	Master Protein	A6B963	ABC transporter, CydDC cysteine exporter (CydDC-E) family, permease/ATP-binding protein CydC OS=Vibrio parahaemolyticus serotype O3:K6 (strain AQ3810) GN=A79_4729 PE=4 SV=1	0	113.504	31.5881	18	30	18	1	573	63.484	6.09	High	High	High		1.054	0.951	99.8	105.3	94.9	19	19	19	5.494	0	96.1684	18
FALSE	High	Master Protein	A6B3S0	ATP phosphoribosyltransferase OS=Vibrio parahaemolyticus serotype O3:K6 (strain AQ3810) GN=hisG PE=3 SV=1	0	113.147	58.3893	14	34	14	1	298	32.852	5.2	High	High	High		1.027	1.007	98.9	101.5	99.6	14	14	14	16.783	0	115.675	14
FALSE	High	Master Protein	A6B1M5	Methyl-accepting chemotaxis protein OS=Vibrio parahaemolyticus serotype O3:K6 (strain AQ3810) GN=A79_6006 PE=4 SV=1	0	112.963	27.5188	14	36	14	1	665	73.073	5.64	High	High	High		1.282	0.921	93.7	120.1	86.3	15	15	15	3.329	0	126.903	14
FALSE	High	Master Protein	A6B9G2	Ribose-5-phosphate isomerase A OS=Vibrio parahaemolyticus serotype O3:K6 (strain AQ3810) GN=rpiA PE=3 SV=1	0	112.927	50	10	38	10	1	218	23.156	4.91	High	High	High		0.525	0.915	122.9	64.5	112.5	12	12	12	21.758	0	130.625	10
FALSE	High	Master Protein	A6B853	General secretion pathway protein D (Fragment) OS=Vibrio parahaemolyticus serotype O3:K6 (strain AQ3810) GN=A79_0764 PE=4 SV=1	0	112.245	47.012	13	42	2	1	251	27.625	8.51	High	High	High		1.259	1	92	115.9	92.1	2	2	2	24.809	0	152.621	13
FALSE	High	Master Protein	A6B6I4	Leucine-responsive regulatory protein OS=Vibrio parahaemolyticus serotype O3:K6 (strain AQ3810) GN=A79_6042 PE=4 SV=1	0	112.049	52.439	8	67	8	1	164	18.793	7.94	High	High	High		1.35	1.016	89.1	120.3	90.6	13	13	13	145.78	0	211.517	8
FALSE	High	Master Protein	A6B4T8	Uncharacterized protein OS=Vibrio parahaemolyticus serotype O3:K6 (strain AQ3810) GN=A79_1367 PE=4 SV=1	0	111.746	45.3368	18	45	18	1	386	43.935	5.21	High	High	High		0.826	1.124	101.7	84	114.3	18	18	18	9	0	129.936	18
FALSE	High	Master Protein	A6BA21	Glutamate decarboxylase (Fragment) OS=Vibrio parahaemolyticus serotype O3:K6 (strain AQ3810) GN=A79_5687 PE=3 SV=1	0	111.688	32.882	16	48	11	1	517	57.935	6.99	High	High	High		1.099	0.924	99.2	109.1	91.7	17	17	17	7.577	6	119.813	16
FALSE	High	Master Protein	A6B0I7	UPF0502 protein A79_3700 OS=Vibrio parahaemolyticus serotype O3:K6 (strain AQ3810) GN=A79_3700 PE=3 SV=1	0	111.641	63.4259	12	65	12	1	216	23.919	5.08	High	High	High		0.959	0.863	106.3	101.9	91.8	13	13	13	55.234	0	234.298	12
FALSE	High	Master Protein	A6B221	Methionyl-tRNA formyltransferase OS=Vibrio parahaemolyticus serotype O3:K6 (strain AQ3810) GN=fmt PE=3 SV=1	0	111.626	46.0317	11	37	11	1	315	34.112	5.31	High	High	High		0.96	1.043	99.9	95.9	104.2	12	12	12	10.365	0	153.518	11
FALSE	High	Master Protein	A6B9Q9	UDP-glucose 6-dehydrogenase OS=Vibrio parahaemolyticus serotype O3:K6 (strain AQ3810) GN=A79_3749 PE=3 SV=1	0	111.611	29.8969	12	54	11	1	388	43.139	5.24	High	High	High		1.178	1.107	91.3	107.6	101.1	14	14	14	6.814	0	181.597	12
FALSE	High	Master Protein	A6AZ07	Oligoendopeptidase F OS=Vibrio parahaemolyticus serotype O3:K6 (strain AQ3810) GN=A79_6238 PE=4 SV=1	0	111.492	28.3806	11	27	11	1	599	67.88	4.89	High	High	High		1.072	1.06	95.8	102.7	101.6	13	13	13	2.398	0	107.078	11
FALSE	High	Master Protein	A6AZZ8	Protein phosphatase CheZ OS=Vibrio parahaemolyticus serotype O3:K6 (strain AQ3810) GN=A79_2639 PE=3 SV=1	0	111.463	59.3496	10	31	10	1	246	27.765	4.61	High	High	High		0.912	0.953	104.7	95.5	99.8	11	11	11	19.535	0	108.947	10
FALSE	High	Master Protein	A6B7B0	Arginine N-succinyltransferase OS=Vibrio parahaemolyticus serotype O3:K6 (strain AQ3810) GN=astA PE=4 SV=1	0	111.12	32.1534	9	44	9	1	339	37.689	5.64	High	High	High		1.354	1.249	83.3	112.8	104	13	13	13	26.384	0	145.638	9
FALSE	High	Master Protein	A6B850	33 kDa chaperonin OS=Vibrio parahaemolyticus serotype O3:K6 (strain AQ3810) GN=hslO PE=3 SV=1	0	110.843	38.8316	8	37	8	1	291	32.264	4.72	High	High	High		0.89	1.205	96.9	86.3	116.8	10	10	10	17.478	0	124.512	8
FALSE	High	Master Protein	A6B7H9	Uncharacterized protein OS=Vibrio parahaemolyticus serotype O3:K6 (strain AQ3810) GN=A79_3446 PE=4 SV=1	0	110.707	59.2105	14	45	13	1	228	25.932	5.38	High	High	High		0.915	1.122	98.8	90.4	110.8	16	16	16	47.697	1	148.108	14
FALSE	High	Master Protein	A6B8R0	Tryptophan--tRNA ligase OS=Vibrio parahaemolyticus serotype O3:K6 (strain AQ3810) GN=trpS PE=3 SV=1	0	110.163	42.8994	8	26	8	1	338	37.624	6.27	High	High	High		0.665	1.059	110.1	73.2	116.6	10	10	10	6.627	0	105.303	8
FALSE	High	Master Protein	A6B2B8	NAD-dependent protein deacylase OS=Vibrio parahaemolyticus serotype O3:K6 (strain AQ3810) GN=cobB PE=3 SV=1	0	110.151	59.751	10	33	9	1	241	26.751	5.34	High	High	High		0.865	0.998	104.8	90.6	104.6	11	11	11	14.849	1	135.348	10
FALSE	High	Master Protein	A6B443	Cellobiose-phosphorylase OS=Vibrio parahaemolyticus serotype O3:K6 (strain AQ3810) GN=A79_5367 PE=4 SV=1	0	110.15	28.803	17	28	17	1	802	90.02	5.2	High	High	High		0.98	1.151	95.8	93.9	110.3	18	18	18	2.594	0	90.8008	17
FALSE	High	Master Protein	A6BAM6	Beta-ketoacyl-[acyl-carrier-protein] synthase III (Fragment) OS=Vibrio parahaemolyticus serotype O3:K6 (strain AQ3810) GN=A79_2363 PE=3 SV=1	0	110.094	42.0635	9	48	9	1	252	26.994	5.12	High	High	High		0.933	1.052	100.5	93.7	105.8	13	13	13	57.78	0	160.063	9
FALSE	High	Master Protein	A6B5M0	S-(hydroxymethyl)glutathione dehydrogenase OS=Vibrio parahaemolyticus serotype O3:K6 (strain AQ3810) GN=A79_5858 PE=3 SV=1	0	110.054	39.267	13	27	13	1	382	40.749	5.29	High	High	High		1.128	1.156	91.4	103	105.6	13	13	13	10.22	0	101.892	13
FALSE	High	Master Protein	A6B2X0	Glycerol-3-phosphate dehydrogenase [NAD(P)+] OS=Vibrio parahaemolyticus serotype O3:K6 (strain AQ3810) GN=gpsA PE=3 SV=1	0	109.975	46.3768	11	29	11	1	345	37.009	5.44	High	High	High		1.024	0.938	101.3	103.7	95	14	14	14	11.743	0	103.218	11
FALSE	High	Master Protein	A6BA24	Cytochrome b (Fragment) OS=Vibrio parahaemolyticus serotype O3:K6 (strain AQ3810) GN=A79_2888 PE=3 SV=1	0	109.962	18.8976	9	73	9	1	381	43.507	7.97	High	High	High		1.273	1.03	90.8	115.6	93.6	19	19	19	183.785	0	168.422	9
FALSE	High	Master Protein	A6B9G0	D-3-phosphoglycerate dehydrogenase OS=Vibrio parahaemolyticus serotype O3:K6 (strain AQ3810) GN=A79_2932 PE=3 SV=1	0	109.799	38.3041	11	47	11	1	342	37.089	6.33	High	High	High		1.114	0.942	98.2	109.4	92.4	13	13	13	13.125	0	154.192	11
FALSE	High	Master Protein	A6B050	Phosphoribosylformylglycinamidine cyclo-ligase OS=Vibrio parahaemolyticus serotype O3:K6 (strain AQ3810) GN=purM PE=3 SV=1	0	109.695	45.3757	12	26	12	1	346	36.839	4.77	High	High	High		0.885	1.06	101.9	90.1	108	12	12	12	7.799	0	108.518	12
FALSE	High	Master Protein	A6B9X5	Peptide chain release factor 1 OS=Vibrio parahaemolyticus serotype O3:K6 (strain AQ3810) GN=prfA PE=3 SV=1	0	109.67	53.5912	17	44	17	1	362	40.269	5.01	High	High	High		0.974	1.025	100	97.4	102.5	19	19	19	9.965	0	129.351	17
FALSE	High	Master Protein	A6B8W0	Autonomous glycyl radical cofactor OS=Vibrio parahaemolyticus serotype O3:K6 (strain AQ3810) GN=grcA PE=3 SV=1	0	109.467	87.2	9	58	7	1	125	13.92	4.77	High	High	High		0.927	0.958	104	96.4	99.6	7	7	7	99	0	181.344	9
FALSE	High	Master Protein	A6B6C0	Uncharacterized protein OS=Vibrio parahaemolyticus serotype O3:K6 (strain AQ3810) GN=A79_3009 PE=3 SV=1	0	109.123	48.1013	7	29	7	1	237	26.575	5.34	High	High	High		0.935	0.917	105.2	98.3	96.5	10	10	10	20.544	0	119.787	7
FALSE	High	Master Protein	A6B4T7	Methyl-accepting chemotaxis protein OS=Vibrio parahaemolyticus serotype O3:K6 (strain AQ3810) GN=A79_1366 PE=4 SV=1	0	108.993	33.0612	12	36	11	1	490	53.26	5.05	High	High	High		1.033	0.871	103.3	106.7	90	12	12	12	4.878	0	130.999	12
FALSE	High	Master Protein	A6B2J8	Ribonuclease PH OS=Vibrio parahaemolyticus serotype O3:K6 (strain AQ3810) GN=rph PE=3 SV=1	0	108.525	53.3613	9	26	9	1	238	25.609	5.5	High	High	High		1.005	0.96	101.2	101.7	97.1	10	10	10	20.544	0	120.271	9
FALSE	High	Master Protein	A6B220	Ribosomal RNA small subunit methyltransferase B OS=Vibrio parahaemolyticus serotype O3:K6 (strain AQ3810) GN=sun PE=3 SV=1	0	108.399	41.452	12	27	12	1	427	47.83	6.64	High	High	High		0.953	1.021	100.9	96.1	103	13	13	13	4.055	0	106.481	12
FALSE	High	Master Protein	A6BBL8	Thiamine biosynthesis protein ThiI (Fragment) OS=Vibrio parahaemolyticus serotype O3:K6 (strain AQ3810) GN=A79_4643 PE=3 SV=1	0	108.398	71.4286	15	29	7	1	266	30.17	5.01	High	High	High		0.899	1.159	98.1	88.2	113.7	7	7	7	10.288	0	106.645	15
FALSE	High	Master Protein	A6B2S1	Arginine repressor OS=Vibrio parahaemolyticus serotype O3:K6 (strain AQ3810) GN=argR PE=3 SV=1	0	108.357	78.481	8	26	8	1	158	17.197	5.57	High	High	High		0.916	0.983	103.5	94.8	101.7	12	12	12	236.137	0	112.2	8
FALSE	High	Master Protein	A6BBF3	Elongation factor G 1 (Fragment) OS=Vibrio parahaemolyticus serotype O3:K6 (strain AQ3810) GN=A79_0137 PE=4 SV=1	0	108.133	69.2308	7	40	7	1	130	14.523	5.71	High	High	High		0.916	1.033	101.8	93.2	105.1	11	11	11	165.81	0	175.443	7
FALSE	High	Master Protein	A6B4E6	ATP-dependent Zn protease OS=Vibrio parahaemolyticus serotype O3:K6 (strain AQ3810) GN=A79_0702 PE=4 SV=1	0	108.105	62.9032	14	38	14	1	248	28.078	5.22	High	High	High		0.957	0.939	103.6	99.1	97.3	14	14	14	21.539	0	131.992	14
FALSE	High	Master Protein	A6B8L2	Ribosomal RNA large subunit methyltransferase K/L OS=Vibrio parahaemolyticus serotype O3:K6 (strain AQ3810) GN=A79_4578 PE=3 SV=1	0	108.085	49.505	16	32	16	1	404	45.587	8.78	High	High	High		1.071	0.99	98	105	97	16	16	16	5.422	0	123.067	16
FALSE	High	Master Protein	A6B9Y8	Triosephosphate isomerase OS=Vibrio parahaemolyticus serotype O3:K6 (strain AQ3810) GN=tpiA PE=3 SV=1	0	108.056	40.625	7	39	7	1	256	26.916	4.79	High	High	High		0.803	1.123	102.5	82.3	115.2	9	9	9	12.895	0	173.481	7
FALSE	High	Master Protein	A6BAV7	Glutathione reductase (Fragment) OS=Vibrio parahaemolyticus serotype O3:K6 (strain AQ3810) GN=A79_0750 PE=4 SV=1	0	108.012	46.875	7	28	1	1	288	31.152	5.62	High	High	High		0.672	1.097	108.3	72.8	118.9	2	2	2	42.288	0	116.039	7
FALSE	High	Master Protein	A6B1K1	Probable alpha-L-glutamate ligase OS=Vibrio parahaemolyticus serotype O3:K6 (strain AQ3810) GN=rimK PE=3 SV=1	0	107.776	48.1728	12	32	12	1	301	32.854	8.98	High	High	High		1.187	1.157	89.7	106.5	103.8	14	14	14	7.111	0	108.821	12
FALSE	High	Master Protein	A6B6I0	ATPase involved in DNA repair OS=Vibrio parahaemolyticus serotype O3:K6 (strain AQ3810) GN=A79_6038 PE=4 SV=1	0	107.671	59.8425	18	47	18	1	254	28.975	8.94	High	High	High		1.149	0.998	95.3	109.6	95.1	19	19	19	30.623	0	136.424	18
FALSE	High	Master Protein	A6B9G4	ABC transporter, ATP-binding protein OS=Vibrio parahaemolyticus serotype O3:K6 (strain AQ3810) GN=A79_5251 PE=4 SV=1	0	107.407	47.3029	12	30	12	1	241	26.875	5.87	High	High	High		1.037	0.983	99.3	103	97.6	13	13	13	17.478	0	111.404	12
FALSE	High	Master Protein	A6B311	Protein TolB OS=Vibrio parahaemolyticus serotype O3:K6 (strain AQ3810) GN=tolB PE=3 SV=1	0	106.983	42.8889	17	38	17	1	450	49.755	9.41	High	High	High		0.563	0.923	120.7	67.9	111.4	21	21	21	5.978	0	104.889	17
FALSE	High	Master Protein	A6B4K4	Methyl-accepting chemotaxis protein OS=Vibrio parahaemolyticus serotype O3:K6 (strain AQ3810) GN=A79_5060 PE=4 SV=1	0	106.937	45.2196	15	38	15	1	387	43.783	4.97	High	High	High		1.545	1.002	84.6	130.7	84.7	17	17	17	8.047	0	137.002	15
FALSE	High	Master Protein	A6B4U2	FAD dependent oxidoreductase OS=Vibrio parahaemolyticus serotype O3:K6 (strain AQ3810) GN=A79_1371 PE=4 SV=1	0	106.851	36.9202	16	29	16	1	539	58.91	6.55	High	High	High		0.788	0.979	108.4	85.4	106.2	17	17	17	3.453	0	99.921	16
FALSE	High	Master Protein	A6AWZ9	Prolyl endopeptidase OS=Vibrio parahaemolyticus serotype O3:K6 (strain AQ3810) GN=pep PE=4 SV=1	0	106.782	31.61	17	36	16	1	677	76.045	4.81	High	High	High		0.775	0.926	111.1	86.1	102.9	18	18	18	3.072	1	113.393	17
FALSE	High	Master Protein	A6B5Y3	UDP-N-acetylmuramoyl-tripeptide--D-alanyl-D-alanine ligase OS=Vibrio parahaemolyticus serotype O3:K6 (strain AQ3810) GN=murF PE=3 SV=1	0	106.453	39.207	12	25	12	1	454	48.705	5.35	High	High	High		1.008	1.031	98.7	99.5	101.8	12	12	12	7.031	0	94.9179	12
FALSE	High	Master Protein	A6AZZ3	Chemotaxis protein CheW OS=Vibrio parahaemolyticus serotype O3:K6 (strain AQ3810) GN=A79_2634 PE=4 SV=1	0	106.254	77.439	9	37	9	1	164	18.406	4.41	High	High	High		0.639	0.985	114.3	73	112.6	12	12	12	52.367	0	125.126	9
FALSE	High	Master Protein	A6B1W5	Outer membrane protein W OS=Vibrio parahaemolyticus serotype O3:K6 (strain AQ3810) GN=A79_5940 PE=4 SV=1	0	106.24	36.4486	6	102	6	1	214	23.453	5.2	High	High	High		1.189	0.744	102.3	121.6	76.1	9	9	9	128.155	0	428.248	6
FALSE	High	Master Protein	A6BA05	Aspartokinase (Fragment) OS=Vibrio parahaemolyticus serotype O3:K6 (strain AQ3810) GN=A79_3745 PE=3 SV=1	0	106.18	43.465	10	32	2	1	329	35.359	5.12	High	High	High		1.072	1.021	97	103.9	99.1	2	2	2	11.743	0	110.267	10
FALSE	High	Master Protein	A6B9F5	tRNA sulfurtransferase (Fragment) OS=Vibrio parahaemolyticus serotype O3:K6 (strain AQ3810) GN=thiI PE=3 SV=1	0	106.053	56.2842	16	31	8	1	366	41.257	8.22	High	High	High		0.86	1.038	103.5	89	107.4	17	17	17	9	8	99.8075	16
FALSE	High	Master Protein	A6B9B7	30S ribosomal protein S4 OS=Vibrio parahaemolyticus serotype O3:K6 (strain AQ3810) GN=rpsD PE=3 SV=1	0	105.939	53.3981	12	93	12	1	206	23.319	10.02	High	High	High		0.405	1.007	124.4	50.3	125.3	13	13	13	24.119	0	346.014	12
FALSE	High	Master Protein	A6B8T1	Ubiquinone/menaquinone biosynthesis C-methyltransferase UbiE OS=Vibrio parahaemolyticus serotype O3:K6 (strain AQ3810) GN=ubiE PE=3 SV=1	0	105.85	45.5598	8	25	8	1	259	28.947	6.35	High	High	High		0.993	1.039	99	98.2	102.8	9	9	9	18.307	0	106.181	8
FALSE	High	Master Protein	A6B2R7	Universal stress protein OS=Vibrio parahaemolyticus serotype O3:K6 (strain AQ3810) GN=A79_0851 PE=3 SV=1	0	105.829	65.5172	8	40	8	1	145	16.097	8.31	High	High	High		1.146	0.955	96.7	110.9	92.4	13	13	13	358.381	0	134.275	8
FALSE	High	Master Protein	A6AX74	3-hydroxyisobutyrate dehydrogenase OS=Vibrio parahaemolyticus serotype O3:K6 (strain AQ3810) GN=A79_0514 PE=4 SV=1	0	105.466	44.5205	11	36	11	1	292	31.345	5.05	High	High	High		0.988	0.887	104.3	103	92.6	12	12	12	18.684	0	117.467	11
FALSE	High	Master Protein	A6B9I7	30S ribosomal protein S3 OS=Vibrio parahaemolyticus serotype O3:K6 (strain AQ3810) GN=rpsC PE=3 SV=1	0	105.166	54.1667	11	63	11	1	240	26.194	10.24	High	High	High		0.557	0.906	121.8	67.8	110.3	12	12	12	14.399	0	236.196	11
FALSE	High	Master Protein	A6B889	Methyl-accepting chemotaxis protein OS=Vibrio parahaemolyticus serotype O3:K6 (strain AQ3810) GN=A79_2790 PE=4 SV=1	0	104.401	39.7436	7	33	7	1	156	17.459	4.82	High	High	High		0.847	0.878	110.1	93.3	96.7	11	11	11	277.256	0	112.597	7
FALSE	High	Master Protein	A6BAB5	Gamma-glutamyl phosphate reductase (Fragment) OS=Vibrio parahaemolyticus serotype O3:K6 (strain AQ3810) GN=proA PE=4 SV=1	0	104.293	46.2633	12	44	12	1	281	30.465	5.87	High	High	High		0.968	1.008	100.8	97.6	101.6	13	13	13	11.589	0	144.662	12
FALSE	High	Master Protein	A6B6G1	Amino acid regulated cytosolic protein OS=Vibrio parahaemolyticus serotype O3:K6 (strain AQ3810) GN=A79_5662 PE=4 SV=1	0	104.13	38.8646	15	29	15	1	458	51.716	8.32	High	High	High		1.21	0.878	97.1	117.6	85.3	15	15	15	8.006	0	100.813	15
FALSE	High	Master Protein	A6B4U4	RNA methyltransferase, TrmH family OS=Vibrio parahaemolyticus serotype O3:K6 (strain AQ3810) GN=A79_1373 PE=4 SV=1	0	104.066	53.2787	10	31	10	1	244	26.211	6.06	High	High	High		1.11	1.015	96	106.5	97.5	10	10	10	25.102	0	126.668	10
FALSE	High	Master Protein	A6AZN0	Alanine racemase OS=Vibrio parahaemolyticus serotype O3:K6 (strain AQ3810) GN=alr PE=3 SV=1	0	103.79	25.9169	7	22	7	1	409	44.301	6.89	High	High	High		0.508	0.714	135	68.6	96.4	10	10	10	4.456	0	96.7892	7
FALSE	High	Master Protein	A6B1C0	Putative phosphoenolpyruvate synthase regulatory protein OS=Vibrio parahaemolyticus serotype O3:K6 (strain AQ3810) GN=A79_1410 PE=3 SV=1	0	103.754	59.3525	15	34	15	1	278	31.504	5.33	High	High	High		1.166	0.978	95.4	111.3	93.3	17	17	17	20.544	0	106.349	15
FALSE	High	Master Protein	A6BA28	N utilization substance protein B homolog OS=Vibrio parahaemolyticus serotype O3:K6 (strain AQ3810) GN=nusB PE=3 SV=1	0	103.737	52.2581	8	32	8	1	155	17.559	5.64	High	High	High		0.775	1.093	104.6	81	114.3	9	9	9	19.309	0	123.763	8
FALSE	High	Master Protein	A6B6G3	Transcriptional regulatory protein TyrR OS=Vibrio parahaemolyticus serotype O3:K6 (strain AQ3810) GN=A79_5664 PE=4 SV=1	0	103.731	31.323	16	36	15	1	514	57.518	5.9	High	High	High		1.137	1.004	95.5	108.6	95.9	16	16	16	4.843	0	114.19	16
FALSE	High	Master Protein	A6AZF2	Lipoprotein OS=Vibrio parahaemolyticus serotype O3:K6 (strain AQ3810) GN=A79_4261 PE=4 SV=1	0	103.584	59.2593	10	58	10	1	189	20.726	5.59	High	High	High		1.319	0.993	90.6	119.5	89.9	14	14	14	120.153	0	184.043	10
FALSE	High	Master Protein	A6B9S0	RNA polymerase sigma-54 factor (Fragment) OS=Vibrio parahaemolyticus serotype O3:K6 (strain AQ3810) GN=rpoN PE=4 SV=1	0	103.416	38.7309	13	31	13	1	457	51.334	4.67	High	High	High		0.899	1.005	103.3	92.9	103.8	13	13	13	10.22	0	106.731	13
FALSE	High	Master Protein	A6B231	Oxygen-dependent coproporphyrinogen-III oxidase OS=Vibrio parahaemolyticus serotype O3:K6 (strain AQ3810) GN=hemF PE=3 SV=1	0	103.32	40.3279	11	29	11	1	305	35.371	5.39	High	High	High		0.977	0.937	103	100.6	96.5	15	15	15	10.159	0	92.0719	11
FALSE	High	Master Protein	A6B5Z8	16 kDa heat shock protein A OS=Vibrio parahaemolyticus serotype O3:K6 (strain AQ3810) GN=A79_3903 PE=3 SV=1	0	103.07	80.6897	10	38	10	1	145	16.492	5.19	High	High	High		0.685	1.297	100.6	68.9	130.5	13	13	13	80.113	0	135.782	10
FALSE	High	Master Protein	A6B9H9	Stringent starvation protein A OS=Vibrio parahaemolyticus serotype O3:K6 (strain AQ3810) GN=A79_5880 PE=3 SV=1	0	102.941	49.2891	9	74	9	1	211	24.3	5.24	High	High	High		1.098	1.056	95.1	104.4	100.5	10	10	10	40.246	0	220.702	9
FALSE	High	Master Protein	A6B7L1	GTP-binding protein HflX (Fragment) OS=Vibrio parahaemolyticus serotype O3:K6 (strain AQ3810) GN=A79_3079 PE=4 SV=1	0	102.655	80.3681	11	36	11	1	163	18.985	4.68	High	High	High		1.08	0.927	99.7	107.8	92.5	12	12	12	42.288	0	123.19	11
FALSE	High	Master Protein	A6B6C2	Twitching motility protein PilT OS=Vibrio parahaemolyticus serotype O3:K6 (strain AQ3810) GN=A79_3011 PE=4 SV=1	0	102.403	55.163	20	38	20	1	368	41.389	7.06	High	High	High		1.144	1.017	94.9	108.6	96.5	20	20	20	8.183	0	113.619	20
FALSE	High	Master Protein	A6B2M4	Uncharacterized protein OS=Vibrio parahaemolyticus serotype O3:K6 (strain AQ3810) GN=A79_0065 PE=4 SV=1	0	102.145	33.5463	18	34	18	1	626	70.404	8.6	High	High	High		0.687	0.907	115.6	79.5	104.9	19	19	19	3.375	0	83.6805	18
FALSE	High	Master Protein	A6B8Z4	DNA mismatch repair protein MutL OS=Vibrio parahaemolyticus serotype O3:K6 (strain AQ3810) GN=mutL PE=3 SV=1	0	101.79	25.8595	14	27	14	1	669	74.872	8.02	High	High	High		1.066	0.992	98.1	104.6	97.3	15	15	15	2.34	0	91.9926	14
FALSE	High	Master Protein	A6B1F2	Trimethylamine-N-oxide reductase c-type cytochrome TorC OS=Vibrio parahaemolyticus serotype O3:K6 (strain AQ3810) GN=torC PE=4 SV=1	0	101.768	36.5482	10	29	10	1	394	44.109	6.05	High	High	High		1.454	0.938	88.4	128.6	83	12	12	12	14.013	0	109.106	10
FALSE	High	Master Protein	A6B1F6	Inorganic diphosphatase OS=Vibrio parahaemolyticus serotype O3:K6 (strain AQ3810) GN=A79_0160 PE=4 SV=1	0	101.588	55.814	9	30	9	1	301	33.008	4.72	High	High	High		0.62	1.103	110.2	68.3	121.5	9	9	9	4.275	0	153.65	9
FALSE	High	Master Protein	A6B7Y9	Elongation factor P-like protein OS=Vibrio parahaemolyticus serotype O3:K6 (strain AQ3810) GN=A79_3822 PE=3 SV=1	0	101.54	44.6809	7	30	7	1	188	20.734	5.03	High	High	High		0.773	1.179	101.6	78.6	119.8	9	9	9	132.352	0	117.278	7
FALSE	High	Master Protein	A6BA03	23S rRNA (guanosine-2'-O-)-methyltransferase RlmB OS=Vibrio parahaemolyticus serotype O3:K6 (strain AQ3810) GN=rlmB PE=3 SV=1	0	101.509	46.5587	10	36	10	1	247	26.696	6.79	High	High	High		0.958	0.929	103.9	99.6	96.5	11	11	11	23.245	0	135.49	10
FALSE	High	Master Protein	A6B4D8	ParA family protein OS=Vibrio parahaemolyticus serotype O3:K6 (strain AQ3810) GN=A79_3293 PE=4 SV=1	0	101.18	56.4202	14	39	14	1	257	28.104	6.58	High	High	High		1.158	0.968	96	111.1	92.9	17	17	17	42.94	0	115.945	14
FALSE	High	Master Protein	A6B5V4	Ribosomal RNA large subunit methyltransferase M OS=Vibrio parahaemolyticus serotype O3:K6 (strain AQ3810) GN=rlmM PE=3 SV=1	0	101.143	42.6997	14	44	14	1	363	41.674	7.43	High	High	High		0.904	1.054	101.4	91.6	106.9	16	16	16	8.085	0	135.157	14
FALSE	High	Master Protein	A6B2N1	3'(2'),5'-bisphosphate nucleotidase OS=Vibrio parahaemolyticus serotype O3:K6 (strain AQ3810) GN=cysQ PE=4 SV=1	0	100.918	57.0909	9	17	9	1	275	30.572	4.98	High	High	High		0.819	0.988	106.9	87.5	105.6	10	10	10	9	0	73.865	9
FALSE	High	Master Protein	A6B9T9	Aminotransferase, class V OS=Vibrio parahaemolyticus serotype O3:K6 (strain AQ3810) GN=A79_4882 PE=3 SV=1	0	100.849	35.6589	11	24	11	1	387	42.311	5.44	High	High	High		0.856	1.168	99.2	84.9	115.9	12	12	12	9	0	94.1692	11
FALSE	High	Master Protein	A6B5K1	DNA-binding protein HU-beta OS=Vibrio parahaemolyticus serotype O3:K6 (strain AQ3810) GN=A79_3999 PE=3 SV=1	0	100.647	64.4444	4	55	4	1	90	9.459	9.13	High	High	High		0.296	0.985	131.5	38.9	129.5	4	4	4	3161.28	0	241.479	4
FALSE	High	Master Protein	A6B7E7	Pyruvate formate-lyase OS=Vibrio parahaemolyticus serotype O3:K6 (strain AQ3810) GN=A79_2124 PE=4 SV=1	0	100.636	27.0136	17	32	17	1	807	89.41	5.66	High	High	High		0.927	0.993	102.8	95.2	102	18	18	18	2.162	0	110.373	17
FALSE	High	Master Protein	A6B3V8	Phosphoserine phosphatase OS=Vibrio parahaemolyticus serotype O3:K6 (strain AQ3810) GN=A79_2967 PE=4 SV=1	0	100.424	40.7975	10	29	10	1	326	35.745	4.91	High	High	High		0.969	1.063	99	95.9	105.2	10	10	10	9	0	102.802	10
FALSE	High	Master Protein	A6B8C3	ATP synthase epsilon chain OS=Vibrio parahaemolyticus serotype O3:K6 (strain AQ3810) GN=atpC PE=3 SV=1	0	99.8252	79.2857	6	28	6	1	140	15.324	6.8	High	High	High		0.865	1.117	100.6	87	112.4	9	9	9	99	0	121.332	6
FALSE	High	Master Protein	A6B0Z2	Uncharacterized protein OS=Vibrio parahaemolyticus serotype O3:K6 (strain AQ3810) GN=A79_5455 PE=4 SV=1	0	99.5111	33.7391	16	32	16	1	575	62.733	4.74	High	High	High		0.86	0.908	108.3	93.2	98.4	17	17	17	4.412	0	99.9749	16
FALSE	High	Master Protein	A6B9P4	Uncharacterized protein OS=Vibrio parahaemolyticus serotype O3:K6 (strain AQ3810) GN=A79_6306 PE=4 SV=1	0	99.4959	50.8021	6	34	6	1	187	19.713	7.99	High	High	High		0.885	0.871	108.8	96.3	94.8	8	8	8	58.948	0	135.972	6
FALSE	High	Master Protein	A6B9I4	Ribosomal protein L2 (Fragment) OS=Vibrio parahaemolyticus serotype O3:K6 (strain AQ3810) GN=rplB PE=4 SV=1	0	99.3564	59.5238	7	50	7	1	126	13.736	11.62	High	High	High		0.449	0.994	122.8	55.1	122.1	9	9	9	236.137	0	194.267	7
FALSE	High	Master Protein	A6B5B0	Adenosine deaminase OS=Vibrio parahaemolyticus serotype O3:K6 (strain AQ3810) GN=add PE=3 SV=1	0	99.3372	48.8024	10	21	10	1	334	36.373	5.03	High	High	High		0.619	0.955	116.6	72.1	111.3	10	10	10	4.456	0	99.9407	10
FALSE	High	Master Protein	A6B6Q6	YitL protein OS=Vibrio parahaemolyticus serotype O3:K6 (strain AQ3810) GN=A79_3349 PE=4 SV=1	0	98.7852	55.9567	15	29	15	1	277	30.82	8.5	High	High	High		1.073	1.08	95.1	102.1	102.8	16	16	16	24.809	0	87.2516	15
FALSE	High	Master Protein	A6B687	UDP-D-quinovosamine 4-dehydrogenase OS=Vibrio parahaemolyticus serotype O3:K6 (strain AQ3810) GN=A79_4091 PE=4 SV=1	0	98.7847	30.0462	14	29	14	1	649	71.056	6.32	High	High	High		0.919	1.081	100	91.9	108.1	15	15	15	2.57	0	101.072	14
FALSE	High	Master Protein	A6AZX3	Phosphohistidine phosphatase SixA OS=Vibrio parahaemolyticus serotype O3:K6 (strain AQ3810) GN=sixA PE=4 SV=1	0	98.3267	71.4286	7	39	7	1	154	17.449	4.75	High	High	High		1.303	0.861	94.8	123.6	81.6	8	8	8	99	0	152.165	7
FALSE	High	Master Protein	A6B4F7	HTH-type transcriptional repressor PurR OS=Vibrio parahaemolyticus serotype O3:K6 (strain AQ3810) GN=purR PE=3 SV=1	0	98.2019	56.2874	12	37	12	1	334	37.65	5.95	High	High	High		1.037	1.237	91.6	95	113.4	13	13	13	9	0	130.243	12
FALSE	High	Master Protein	A6B215	Sporulation-control protein OS=Vibrio parahaemolyticus serotype O3:K6 (strain AQ3810) GN=A79_5201 PE=4 SV=1	0	97.9996	46.2687	12	49	12	1	268	30.023	5.02	High	High	High		1.24	1.021	92	114.1	93.9	13	13	13	26.384	0	170.017	12
FALSE	High	Master Protein	A6B2P1	2',3'-cyclic-nucleotide 2'-phosphodiesterase OS=Vibrio parahaemolyticus serotype O3:K6 (strain AQ3810) GN=cpdB PE=3 SV=1	0	97.945	29.5559	13	23	13	1	653	72.336	5.3	High	High	High		0.453	0.764	135.3	61.3	103.4	13	13	13	1.985	0	83.7855	13
FALSE	High	Master Protein	A6B5B6	Probable GTP-binding protein EngB OS=Vibrio parahaemolyticus serotype O3:K6 (strain AQ3810) GN=engB PE=3 SV=1	0	97.786	66.21	11	30	11	1	219	24.626	7.99	High	High	High		1.032	1.015	98.5	101.6	99.9	13	13	13	37.312	0	111.663	11
FALSE	High	Master Protein	A6B314	Quinolinate synthase A OS=Vibrio parahaemolyticus serotype O3:K6 (strain AQ3810) GN=nadA PE=3 SV=1	0	97.5151	54.6742	11	22	11	1	353	38.567	5.17	High	High	High		0.781	0.962	109.4	85.4	105.2	12	12	12	6.079	0	67.2081	11
FALSE	High	Master Protein	A6AYM3	Cti OS=Vibrio parahaemolyticus serotype O3:K6 (strain AQ3810) GN=A79_1620 PE=4 SV=1	0	97.1737	28.0856	18	30	18	1	794	91.907	5.67	High	High	High		0.992	0.964	101.5	100.7	97.8	19	19	19	2.481	0	84.4504	18
FALSE	High	Master Protein	A6B5Q6	4-hydroxythreonine-4-phosphate dehydrogenase OS=Vibrio parahaemolyticus serotype O3:K6 (strain AQ3810) GN=pdxA PE=3 SV=1	0	96.6339	46.988	11	29	11	1	332	36.044	5.53	High	High	High		1.1	1.062	94.9	104.4	100.8	12	12	12	10.288	0	103.402	11
FALSE	High	Master Protein	A6B5B8	Peptidase S49 (Fragment) OS=Vibrio parahaemolyticus serotype O3:K6 (strain AQ3810) GN=A79_1703 PE=4 SV=1	0	96.4276	37.6271	10	35	3	1	295	32.594	6.64	High	High	High		1.14	1.086	93	106	101	10	10	10	10.365	7	122.726	10
FALSE	High	Master Protein	A6AZJ7	HTH-type transcriptional regulator EbgR OS=Vibrio parahaemolyticus serotype O3:K6 (strain AQ3810) GN=A79_4307 PE=4 SV=1	0	96.1569	41.8182	11	24	11	1	330	36.9	5.8	High	High	High		0.841	0.88	110.2	92.8	97	11	11	11	7.913	0	84.6301	11
FALSE	High	Master Protein	A6B5Q7	Chaperone SurA OS=Vibrio parahaemolyticus serotype O3:K6 (strain AQ3810) GN=surA PE=3 SV=1	0	96.0322	35.5972	13	26	13	1	427	47.406	5.85	High	High	High		0.485	1.049	118.4	57.4	124.2	13	13	13	3.394	0	103.249	13
FALSE	High	Master Protein	A6B6V2	Single-stranded-DNA-specific exonuclease RecJ OS=Vibrio parahaemolyticus serotype O3:K6 (strain AQ3810) GN=recJ PE=4 SV=1	0	95.9415	31.0881	14	27	14	1	579	64.174	5.83	High	High	High		0.926	0.889	106.6	98.7	94.7	14	14	14	2.831	0	94.3395	14
FALSE	High	Master Protein	A6B9Q2	DNA polymerase I OS=Vibrio parahaemolyticus serotype O3:K6 (strain AQ3810) GN=A79_4899 PE=4 SV=1	0	95.4891	47.9876	12	31	10	1	323	35.69	5.19	High	High	High		1.2	1.18	88.8	106.5	104.7	12	12	12	13.384	0	97.6702	12
FALSE	High	Master Protein	A6AYJ7	Divalent cation transporter OS=Vibrio parahaemolyticus serotype O3:K6 (strain AQ3810) GN=A79_1594 PE=4 SV=1	0	95.3952	53	9	42	9	1	200	22.353	5.22	High	High	High		1.237	0.891	95.9	118.6	85.5	11	11	11	64.793	0	150.97	9
FALSE	High	Master Protein	A6B140	Uncharacterized protein OS=Vibrio parahaemolyticus serotype O3:K6 (strain AQ3810) GN=A79_6104 PE=4 SV=1	0	94.9041	55.3846	5	41	5	1	130	14.666	6.55	High	High	High		1.692	1.125	78.6	133	88.4	8	8	8	267.27	0	156.603	5
FALSE	High	Master Protein	A6B9I6	50S ribosomal protein L22 OS=Vibrio parahaemolyticus serotype O3:K6 (strain AQ3810) GN=rplV PE=3 SV=1	0	94.8267	66.3636	7	39	7	1	110	12.078	9.91	High	High	High		0.376	1.153	118.6	44.6	136.7	8	8	8	192.07	0	164.844	7
FALSE	High	Master Protein	A6B381	UDP-glucose 4-epimerase OS=Vibrio parahaemolyticus serotype O3:K6 (strain AQ3810) GN=galE PE=4 SV=1	0	94.5323	55.3254	14	51	14	1	338	36.934	5.25	High	High	High		0.937	0.963	103.4	97	99.6	15	15	15	11.589	0	167.732	14
FALSE	High	Master Protein	A6B5X7	Ribosomal RNA small subunit methyltransferase I OS=Vibrio parahaemolyticus serotype O3:K6 (strain AQ3810) GN=rsmI PE=3 SV=1	0	94.4202	49.1289	12	28	12	1	287	31.675	6.13	High	High	High		1.059	0.998	98.1	103.9	97.9	12	12	12	9	0	93.8938	12
FALSE	High	Master Protein	A6B9G9	Phosphoenolpyruvate-protein phosphotransferase OS=Vibrio parahaemolyticus serotype O3:K6 (strain AQ3810) GN=ptsI PE=3 SV=1	0	94.3583	30.3476	18	26	18	1	748	83.681	5.6	High	High	High		1.259	0.963	93.1	117.2	89.7	19	19	19	2.695	0	89.3833	18
FALSE	High	Master Protein	A6B107	Exodeoxyribonuclease III OS=Vibrio parahaemolyticus serotype O3:K6 (strain AQ3810) GN=xth PE=4 SV=1	0	94.3444	36.9403	9	30	9	1	268	31.323	6.24	High	High	High		0.888	0.963	105.2	93.4	101.3	9	9	9	9	0	102.436	9
FALSE	High	Master Protein	A6B6U3	RNA chaperone ProQ OS=Vibrio parahaemolyticus serotype O3:K6 (strain AQ3810) GN=proQ PE=3 SV=1	0	94.2898	48.8038	8	25	8	1	209	23.23	9.52	High	High	High		0.51	1.084	115.6	59	125.4	8	8	8	9	0	99.8853	8
FALSE	High	Master Protein	A6AX44	Methyl-accepting chemotaxis protein OS=Vibrio parahaemolyticus serotype O3:K6 (strain AQ3810) GN=A79_0484 PE=4 SV=1	0	94.212	32.4451	15	29	14	1	638	69.586	4.87	High	High	High		0.988	1.017	99.8	98.6	101.5	14	14	14	2.065	0	92.7121	15
FALSE	High	Master Protein	A6B4I8	Integral membrane protein OS=Vibrio parahaemolyticus serotype O3:K6 (strain AQ3810) GN=A79_5151 PE=4 SV=1	0	94.0281	33.2278	8	35	8	1	316	34.659	4.64	High	High	High		1.317	1.063	88.8	116.9	94.4	9	9	9	62.096	0	122.245	8
FALSE	High	Master Protein	A6B9P7	Uncharacterized protein OS=Vibrio parahaemolyticus serotype O3:K6 (strain AQ3810) GN=A79_2529 PE=4 SV=1	0	93.9734	81.8182	8	31	8	1	154	17.572	4.7	High	High	High		1.07	1.003	97.6	104.5	97.9	11	11	11	99	0	109.088	8
FALSE	High	Master Protein	A6B6E6	5'-nucleotidase SurE OS=Vibrio parahaemolyticus serotype O3:K6 (strain AQ3810) GN=surE PE=3 SV=1	0	93.7389	43.7984	8	23	8	1	258	28.141	5.35	High	High	High		0.82	1.052	104.5	85.6	109.9	9	9	9	10.788	0	96.9405	8
FALSE	High	Master Protein	A6B5Z2	DNA polymerase III subunit beta (Fragment) OS=Vibrio parahaemolyticus serotype O3:K6 (strain AQ3810) GN=dnaN PE=4 SV=1	0	93.5842	58.9552	11	22	11	1	268	29.95	4.91	High	High	High		0.775	0.946	110.3	85.4	104.3	11	11	11	14.849	0	79.2826	11
FALSE	High	Master Protein	A6B5I5	Isopenicillin N synthase OS=Vibrio parahaemolyticus serotype O3:K6 (strain AQ3810) GN=A79_4409 PE=3 SV=1	0	93.5765	51.6129	9	22	9	1	279	31.756	4.92	High	High	High		0.54	0.871	124.4	67.2	108.4	12	12	12	12.594	0	79.0195	9
FALSE	High	Master Protein	A6B3P9	ATP-dependent dethiobiotin synthetase BioD OS=Vibrio parahaemolyticus serotype O3:K6 (strain AQ3810) GN=bioD PE=3 SV=1	0	93.391	66.6667	10	22	10	1	228	24.696	5.02	High	High	High		1.116	1.133	92.3	103	104.6	11	11	11	15.379	0	89.5136	10
FALSE	High	Master Protein	A6AZ90	ABC-type proline/glycine betaine transport system, periplasmic component OS=Vibrio parahaemolyticus serotype O3:K6 (strain AQ3810) GN=A79_4502 PE=4 SV=1	0	92.9957	45.1923	12	41	12	1	312	34.215	5.81	High	High	High		0.183	0.403	189.1	34.7	76.2	13	13	13	11.915	0	129.832	12
FALSE	High	Master Protein	A6B923	DNA translocase FtsK (Fragment) OS=Vibrio parahaemolyticus serotype O3:K6 (strain AQ3810) GN=A79_3326 PE=3 SV=1	0	92.9312	22.8198	12	27	12	1	688	75.589	4.74	High	High	High		1.022	0.964	100.5	102.7	96.8	12	12	12	3.217	0	91.626	12
FALSE	High	Master Protein	A6B818	Thymidine kinase OS=Vibrio parahaemolyticus serotype O3:K6 (strain AQ3810) GN=tdk PE=3 SV=1	0	92.893	60.9375	10	23	10	1	192	21.811	6.86	High	High	High		0.867	1.119	100.5	87.1	112.4	10	10	10	18.307	0	76.806	10
FALSE	High	Master Protein	A6B9H1	30S ribosomal protein S8 OS=Vibrio parahaemolyticus serotype O3:K6 (strain AQ3810) GN=rpsH PE=3 SV=1	0	92.3197	53.0769	7	35	7	1	130	13.999	9.7	High	High	High		0.6	1.184	107.8	64.6	127.6	9	9	9	99	0	113.506	7
FALSE	High	Master Protein	A6B300	o-succinylbenzoate synthase OS=Vibrio parahaemolyticus serotype O3:K6 (strain AQ3810) GN=menC PE=3 SV=1	0	92.1431	42.2492	12	29	12	1	329	36.391	4.81	High	High	High		0.764	1.117	104.1	79.5	116.4	13	13	13	15.681	0	90.6019	12
FALSE	High	Master Protein	A6B9V6	Dihydropteroate synthase OS=Vibrio parahaemolyticus serotype O3:K6 (strain AQ3810) GN=folP PE=3 SV=1	0	92.0382	59.4203	11	24	11	1	276	30.139	5.38	High	High	High		0.781	1.187	101.1	79	120	13	13	13	5.813	0	92.8475	11
FALSE	High	Master Protein	A6B276	UPF0255 protein A79_2578 OS=Vibrio parahaemolyticus serotype O3:K6 (strain AQ3810) GN=A79_2578 PE=3 SV=1	0	91.7907	32.5301	14	34	14	1	415	47.077	8.41	High	High	High		1.113	0.95	98	109	93.1	14	14	14	6.017	0	96.882	14
FALSE	High	Master Protein	A6B4W5	Adenine phosphoribosyltransferase OS=Vibrio parahaemolyticus serotype O3:K6 (strain AQ3810) GN=apt PE=3 SV=1	0	91.7635	51.9337	8	36	8	1	181	19.607	5.02	High	High	High		0.922	0.951	104.4	96.3	99.3	8	8	8	17.738	0	162.224	8
FALSE	High	Master Protein	A6B254	Protein GrpE OS=Vibrio parahaemolyticus serotype O3:K6 (strain AQ3810) GN=grpE PE=3 SV=1	0	91.6649	55.5556	12	43	12	1	198	22.355	4.58	High	High	High		0.439	1.242	111.9	49.1	138.9	12	12	12	27.943	0	135.98	12
FALSE	High	Master Protein	A6B5E9	Glutathione S-transferase OS=Vibrio parahaemolyticus serotype O3:K6 (strain AQ3810) GN=A79_4684 PE=4 SV=1	0	91.505	48.4211	10	30	10	1	285	32.174	5.02	High	High	High		0.431	0.951	126	54.3	119.8	12	12	12	6.627	0	124.168	10
FALSE	High	Master Protein	A6B7V6	Uridylate kinase OS=Vibrio parahaemolyticus serotype O3:K6 (strain AQ3810) GN=pyrH PE=3 SV=1	0	91.376	50.2415	10	45	10	1	207	22.24	5.44	High	High	High		0.69	1.013	111	76.6	112.4	14	14	14	21.758	0	168.97	10
FALSE	High	Master Protein	A6B4W1	AphB/LysR family OS=Vibrio parahaemolyticus serotype O3:K6 (strain AQ3810) GN=A79_3047 PE=4 SV=1	0	90.7633	45.3608	15	37	15	1	291	33.144	6.89	High	High	High		0.973	1.042	99.5	96.8	103.7	16	16	16	10.103	0	100.862	15
FALSE	High	Master Protein	A6B7Z8	Outer membrane protein assembly factor BamD OS=Vibrio parahaemolyticus serotype O3:K6 (strain AQ3810) GN=bamD PE=3 SV=1	0	90.5914	53.719	16	35	16	1	242	27.831	6.04	High	High	High		0.915	1.041	101.5	92.8	105.7	17	17	17	17.33	0	103.257	16
FALSE	High	Master Protein	A6AXZ5	6-phosphogluconolactonase OS=Vibrio parahaemolyticus serotype O3:K6 (strain AQ3810) GN=pgl PE=4 SV=1	0	90.3814	38.6555	5	24	5	1	238	25.977	5.11	High	High	High		0.678	0.966	113.5	76.9	109.6	9	9	9	45.416	0	95.5977	5
FALSE	High	Master Protein	A6B8C6	Msha biogenesis protein mshh OS=Vibrio parahaemolyticus serotype O3:K6 (strain AQ3810) GN=A79_6319 PE=4 SV=1	0	90.0731	29.3023	17	30	17	1	645	74.619	7.27	High	High	High		1.271	0.939	93.4	118.8	87.8	17	17	17	2.529	0	74.8992	17
FALSE	High	Master Protein	A6B7D3	Ribonucleoside-diphosphate reductase, beta subunit OS=Vibrio parahaemolyticus serotype O3:K6 (strain AQ3810) GN=A79_6381 PE=4 SV=1	0	90.0002	28.1167	8	22	8	1	377	43.688	4.84	High	High	High		0.562	1.033	115.6	65	119.4	9	9	9	3.217	0	85.2761	8
FALSE	High	Master Protein	A6B4K8	Inner membrane protein YejM OS=Vibrio parahaemolyticus serotype O3:K6 (strain AQ3810) GN=A79_5064 PE=4 SV=1	0	89.8702	28.5714	15	33	15	1	602	68.909	6.13	High	High	High		1.242	0.929	94.6	117.5	87.9	16	16	16	6.667	0	101.449	15
FALSE	High	Master Protein	A6B925	ATPase, AAA family OS=Vibrio parahaemolyticus serotype O3:K6 (strain AQ3810) GN=A79_3328 PE=4 SV=1	0	89.7811	31.6785	11	29	2	1	423	46.642	5.63	High	High	High		0.888	1.103	100.3	89.1	110.6	3	3	3	3.507	0	101.18	11
FALSE	High	Master Protein	A6B2F7	Molydopterin dinucleotide-binding region OS=Vibrio parahaemolyticus serotype O3:K6 (strain AQ3810) GN=A79_4783 PE=3 SV=1	0	89.7055	17.9612	13	23	13	1	1030	113.232	7.78	High	High	High		0.884	1.343	93	82.2	124.8	14	14	14	1.125	0	77.3368	13
FALSE	High	Master Protein	A6AZZ9	Chemotaxis protein CheY OS=Vibrio parahaemolyticus serotype O3:K6 (strain AQ3810) GN=A79_2640 PE=4 SV=1	0	89.5354	53.1746	5	37	5	1	126	14.292	7.42	High	High	High		0.669	0.91	116.3	77.8	105.9	9	9	9	214.443	0	154.192	5
FALSE	High	Master Protein	A6B9X7	Lipoic acid synthetase (Fragment) OS=Vibrio parahaemolyticus serotype O3:K6 (strain AQ3810) GN=lipA PE=3 SV=1	0	89.4837	44.8052	14	37	14	1	308	34.85	7.49	High	High	High		0.687	1.01	111.3	76.4	112.3	15	15	15	9	0	98.3866	14
FALSE	High	Master Protein	A6AZY7	Cytochrome c-type biogenesis protein CcmE OS=Vibrio parahaemolyticus serotype O3:K6 (strain AQ3810) GN=ccmE PE=3 SV=1	0	89.1529	49.6894	7	29	7	1	161	17.743	6.34	High	High	High		1.319	1.061	88.8	117.1	94.2	9	9	9	99	0	107.296	7
FALSE	High	Master Protein	A6B8B0	Orotidine 5'-phosphate decarboxylase OS=Vibrio parahaemolyticus serotype O3:K6 (strain AQ3810) GN=pyrF PE=3 SV=1	0	88.9921	38.1974	8	33	8	1	233	25.35	5.71	High	High	High		0.797	0.922	110.3	87.9	101.7	10	10	10	18.307	0	121.695	8
FALSE	High	Master Protein	A6AZ78	Acetyl-CoA acetyltransferase OS=Vibrio parahaemolyticus serotype O3:K6 (strain AQ3810) GN=A79_4490 PE=3 SV=1	0	88.9759	29.3367	8	19	8	1	392	41.652	5.58	High	High	High		0.923	0.747	112.4	103.7	83.9	8	8	8	3.806	0	78.8526	8
FALSE	High	Master Protein	A6B195	Outer membrane protein OS=Vibrio parahaemolyticus serotype O3:K6 (strain AQ3810) GN=A79_1878 PE=4 SV=1	0	88.6645	39.0093	7	23	7	1	323	34.919	4.51	High	High	High		0.975	2.205	71.8	70	158.3	8	8	8	4.412	0	92.9589	7
FALSE	High	Master Protein	A6B112	Arginine/ornithine transport ATP-binding protein AotP OS=Vibrio parahaemolyticus serotype O3:K6 (strain AQ3810) GN=A79_6076 PE=4 SV=1	0	88.5894	44.5312	10	30	10	1	256	28.189	5.78	High	High	High		1.456	0.964	87.7	127.7	84.5	10	10	10	7.66	0	111.499	10
FALSE	High	Master Protein	A6B8T4	Dihydroxy-acid dehydratase OS=Vibrio parahaemolyticus serotype O3:K6 (strain AQ3810) GN=A79_1769 PE=3 SV=1	0	88.4902	49.1409	12	23	1	1	291	30.991	5.11	High	High	High		1.3	1.198	85.8	111.5	102.7	1	1	1	6.305	0	74.0534	12
FALSE	High	Master Protein	A6B9L7	Lysine decarboxylase, constitutive OS=Vibrio parahaemolyticus serotype O3:K6 (strain AQ3810) GN=A79_5805 PE=4 SV=1	0	88.4125	35.9184	16	41	16	1	490	55.091	5.8	High	High	High		0.505	0.523	147.9	74.7	77.4	16	16	16	4.233	0	106.886	16
FALSE	High	Master Protein	A6B7I2	Methyl-accepting chemotaxis protein OS=Vibrio parahaemolyticus serotype O3:K6 (strain AQ3810) GN=A79_3449 PE=4 SV=1	0	88.3772	31.5789	9	22	8	1	418	45.535	4.46	High	High	High		1.606	1.126	80.4	129.1	90.5	9	9	9	9	0	99.9291	9
FALSE	High	Master Protein	A6AZ89	Oxygen-dependent choline dehydrogenase OS=Vibrio parahaemolyticus serotype O3:K6 (strain AQ3810) GN=betA PE=3 SV=1	0	88.0878	28.9157	14	25	14	1	581	64.37	5.68	High	High	High		0.392	0.452	162.7	63.8	73.5	17	17	17	2.162	0	76.8866	14
FALSE	High	Master Protein	A6B6B5	Acetolactate synthase OS=Vibrio parahaemolyticus serotype O3:K6 (strain AQ3810) GN=ilvB PE=3 SV=1	0	88.0741	26.1324	16	36	16	1	574	63.036	6.05	High	High	High		1.008	0.968	100.8	101.6	97.6	16	16	16	5.813	0	97.4914	16
FALSE	High	Master Protein	A6B9Q6	ADP-ribose pyrophosphatase OS=Vibrio parahaemolyticus serotype O3:K6 (strain AQ3810) GN=A79_4962 PE=4 SV=1	0	87.9596	59.2593	10	27	10	1	216	24.7	4.98	High	High	High		0.935	0.954	103.8	97.1	99.1	11	11	11	9	0	103.389	10
FALSE	High	Master Protein	A6B891	LPS-assembly lipoprotein LptE OS=Vibrio parahaemolyticus serotype O3:K6 (strain AQ3810) GN=lptE PE=3 SV=1	0	87.8503	47.2222	8	35	8	1	180	20.459	8.92	High	High	High		1.1	1.116	93.3	102.6	104.1	11	11	11	27.943	0	92.0686	8
FALSE	High	Master Protein	A6B6R3	General L-amino acid-binding periplasmic protein AapJ OS=Vibrio parahaemolyticus serotype O3:K6 (strain AQ3810) GN=A79_3356 PE=4 SV=1	0	87.7697	49.1228	13	26	13	1	342	36.657	5.87	High	High	High		0.837	0.953	107.5	90	102.5	14	14	14	5.7	0	91.8832	13
FALSE	High	Master Protein	A6B5R4	2-isopropylmalate synthase OS=Vibrio parahaemolyticus serotype O3:K6 (strain AQ3810) GN=leuA PE=3 SV=1	0	87.5923	37.2816	14	22	14	1	515	56.105	5.49	High	High	High		0.908	0.97	104.2	94.7	101.1	15	15	15	2.275	0	76.8224	14
FALSE	High	Master Protein	A6B2Z2	Deoxyguanosinetriphosphate triphosphohydrolase-like protein OS=Vibrio parahaemolyticus serotype O3:K6 (strain AQ3810) GN=A79_5034 PE=3 SV=1	0	87.5381	40.3153	16	32	16	1	444	50.493	6.8	High	High	High		1.031	0.968	100	103.1	96.9	18	18	18	5.529	0	94.5659	16
FALSE	High	Master Protein	A6B5Y5	UDP-N-acetylmuramoylalanine--D-glutamate ligase OS=Vibrio parahaemolyticus serotype O3:K6 (strain AQ3810) GN=murD PE=3 SV=1	0	87.4443	33.8673	13	23	13	1	437	47.202	5.25	High	High	High		1.03	1.011	98.6	101.6	99.8	15	15	15	4.754	0	79.8224	13
FALSE	High	Master Protein	A6B3C0	Zinc protease OS=Vibrio parahaemolyticus serotype O3:K6 (strain AQ3810) GN=A79_3189 PE=3 SV=1	0	87.3182	21.8579	17	25	17	1	915	102.163	5.2	High	High	High		0.93	0.974	103.3	96.1	100.6	17	17	17	1.395	0	79.6201	17
FALSE	High	Master Protein	A6B657	Putative ATP-dependent RNA helicase RhlE OS=Vibrio parahaemolyticus serotype O3:K6 (strain AQ3810) GN=A79_4384 PE=3 SV=1	0	87.2315	34.6512	11	17	11	1	430	48.061	9.45	High	High	High		0.684	0.859	118	80.7	101.3	13	13	13	2.3	0	67.0904	11
FALSE	High	Master Protein	A6B541	Glyceraldehyde-3-phosphate dehydrogenase OS=Vibrio parahaemolyticus serotype O3:K6 (strain AQ3810) GN=gap PE=3 SV=1	0	87.2152	49.8498	12	22	10	1	333	36.426	6.06	High	High	High		0.914	0.937	105.2	96.1	98.6	10	10	10	6.848	0	78.857	12
FALSE	High	Master Protein	A6B3S5	1-(5-phosphoribosyl)-5-[(5-phosphoribosylamino)methylideneamino] imidazole-4-carboxamide isomerase OS=Vibrio parahaemolyticus serotype O3:K6 (strain AQ3810) GN=hisA PE=3 SV=1	0	86.8706	49.7959	10	23	3	1	245	26.363	4.58	High	High	High		0.991	0.881	104.5	103.6	92	11	11	11	14.849	8	74.4776	10
FALSE	High	Master Protein	A6B521	Type I secretion target ggxgxdxxx repeat (2 copies) domain protein (Fragment) OS=Vibrio parahaemolyticus serotype O3:K6 (strain AQ3810) GN=A79_0282 PE=4 SV=1	0	86.6615	5.74937	17	25	16	1	5131	538.124	3.85	High	High	High		0.898	0.897	107.3	96.4	96.3	18	18	18	0.738	1	72.1276	17
FALSE	High	Master Protein	A6AX25	ATP-dependent RNA helicase RhlE OS=Vibrio parahaemolyticus serotype O3:K6 (strain AQ3810) GN=rhlE PE=3 SV=1	0	86.631	36.036	15	33	15	1	444	49.987	9.7	High	High	High		0.769	1.035	107	82.3	110.7	15	15	15	3.417	0	96.794	15
FALSE	High	Master Protein	A6AZ97	Ggdef family protein OS=Vibrio parahaemolyticus serotype O3:K6 (strain AQ3810) GN=A79_4509 PE=4 SV=1	0	86.4941	19.5349	14	21	14	1	860	96.558	5.5	High	High	High		1.099	0.828	102.5	112.6	84.9	15	15	15	1.26	0	73.0979	14
FALSE	High	Master Protein	A6B3Q1	Protease HtpX OS=Vibrio parahaemolyticus serotype O3:K6 (strain AQ3810) GN=htpX PE=3 SV=1	0	86.4329	37.6307	9	29	9	1	287	31.062	6.43	High	High	High		0.833	1.162	100.2	83.5	116.4	10	10	10	30.623	0	111.931	9
FALSE	High	Master Protein	A6B7W0	Methionine aminopeptidase OS=Vibrio parahaemolyticus serotype O3:K6 (strain AQ3810) GN=map PE=3 SV=1	0	86.3375	40.411	9	19	9	1	292	32.327	5.95	High	High	High		0.854	0.97	106.2	90.7	103.1	10	10	10	9	0	70.2894	9
FALSE	High	Master Protein	A6AXX7	ABC superfamily OS=Vibrio parahaemolyticus serotype O3:K6 (strain AQ3810) GN=A79_0988 PE=4 SV=1	0	85.9171	48.3582	11	19	11	1	335	36.648	6.27	High	High	High		0.38	0.522	157.7	60	82.4	12	12	12	5.31	0	76.875	11
FALSE	High	Master Protein	A6AZZ5	ParA family protein OS=Vibrio parahaemolyticus serotype O3:K6 (strain AQ3810) GN=A79_2636 PE=4 SV=1	0	85.8567	35.5212	10	27	10	1	259	28.789	8.85	High	High	High		1.487	1.077	84.2	125.2	90.7	11	11	11	28.286	0	78.4347	10
FALSE	High	Master Protein	A6B8V8	Signal recognition particle receptor FtsY OS=Vibrio parahaemolyticus serotype O3:K6 (strain AQ3810) GN=ftsY PE=3 SV=1	0	85.6158	41.1911	10	27	6	1	403	43.928	4.65	High	High	High		0.579	0.983	117.1	67.8	115.1	11	11	11	4.484	5	102.822	10
FALSE	High	Master Protein	A6B5P9	GTP-binding protein Obg/CgtA (Fragment) OS=Vibrio parahaemolyticus serotype O3:K6 (strain AQ3810) GN=A79_2408 PE=3 SV=1	0	85.3052	38.1443	11	23	11	1	388	43.09	4.83	High	High	High		0.62	0.986	115.1	71.4	113.5	12	12	12	4.484	0	86.6371	11
FALSE	High	Master Protein	A6B002	Flagellar biosynthesis protein FlhF OS=Vibrio parahaemolyticus serotype O3:K6 (strain AQ3810) GN=A79_2643 PE=4 SV=1	0	84.6171	33.2008	16	36	16	1	503	56.32	6.76	High	High	High		1.096	0.973	97.7	107.1	95.1	17	17	17	3.642	0	110.3	16
FALSE	High	Master Protein	A6B126	Lipid A export ATP-binding/permease protein MsbA OS=Vibrio parahaemolyticus serotype O3:K6 (strain AQ3810) GN=msbA PE=3 SV=1	0	84.3568	25.945	13	28	13	1	582	64.483	7.08	High	High	High		1.017	1.035	98.3	100	101.7	14	14	14	2.652	0	86.3515	13
FALSE	High	Master Protein	A6B3R6	DNA-binding protein OS=Vibrio parahaemolyticus serotype O3:K6 (strain AQ3810) GN=A79_3867 PE=3 SV=1	0	84.0597	62.2222	9	38	9	1	135	15.067	5.03	High	High	High		0.326	1.01	128.4	41.9	129.7	9	9	9	13.251	0	135.379	9
FALSE	High	Master Protein	A6B7V1	Glycosyl transferase, family 2 OS=Vibrio parahaemolyticus serotype O3:K6 (strain AQ3810) GN=A79_2271 PE=4 SV=1	0	83.983	51.004	12	33	12	1	249	27.235	7.52	High	High	High		1.359	0.986	89.7	121.9	88.4	14	14	14	20.544	0	101.708	12
FALSE	High	Master Protein	A6B014	Flagellar protein export ATPase FliI OS=Vibrio parahaemolyticus serotype O3:K6 (strain AQ3810) GN=fliI PE=4 SV=1	0	83.8302	42.8246	14	16	14	1	439	46.769	5.82	High	High	High		1.1	0.927	99.1	109	91.8	14	14	14	2.728	0	62.1998	14
FALSE	High	Master Protein	A6B5L6	Cyclic nucleotide binding protein/2 CBS domains OS=Vibrio parahaemolyticus serotype O3:K6 (strain AQ3810) GN=A79_5854 PE=4 SV=1	0	83.4952	35.8521	15	21	15	1	622	69.629	6.4	High	High	High		1.045	0.841	103.9	108.6	87.4	16	16	16	1.622	0	70.1746	15
FALSE	High	Master Protein	A6B1L1	C4-dicarboxylate transport transcriptional regulatory protein OS=Vibrio parahaemolyticus serotype O3:K6 (strain AQ3810) GN=A79_5991 PE=4 SV=1	0	83.3761	30.5987	10	27	10	1	451	50.863	5.29	High	High	High		1.249	0.875	96	119.9	84	10	10	10	3.125	0	88.7239	10
FALSE	High	Master Protein	A6BAE0	ATPase, AAA family (Fragment) OS=Vibrio parahaemolyticus serotype O3:K6 (strain AQ3810) GN=A79_4543 PE=4 SV=1	0	83.3653	46.5704	12	33	3	1	277	30.741	5.24	High	High	High		1.066	1.006	97.6	104.1	98.3	14	14	14	9	10	89.0054	12
FALSE	High	Master Protein	A6B771	Acyl-[acyl-carrier-protein]--UDP-N-acetylglucosamine O-acyltransferase OS=Vibrio parahaemolyticus serotype O3:K6 (strain AQ3810) GN=lpxA PE=3 SV=1	0	83.3066	29.3893	8	18	8	1	262	28.22	6.64	High	High	High		0.837	1.143	100.6	84.3	115.1	8	8	8	38.811	0	60.9897	8
FALSE	High	Master Protein	A6AZM0	Long-chain acyl-CoA synthetase OS=Vibrio parahaemolyticus serotype O3:K6 (strain AQ3810) GN=A79_4330 PE=4 SV=1	0	83.1913	36.0568	19	27	19	1	563	62.786	6.38	High	High	High		1.32	0.941	92	121.4	86.6	19	19	19	4.623	0	73.4443	19
FALSE	High	Master Protein	A6BAP7	Glutamyl-tRNA reductase OS=Vibrio parahaemolyticus serotype O3:K6 (strain AQ3810) GN=hemA PE=3 SV=1	0	83.1519	33.687	9	16	8	1	377	41.331	5.71	High	High	High		1.093	1.026	96.2	105.1	98.7	9	9	9	2.162	1	66.1703	9
FALSE	High	Master Protein	A6B504	S-ribosylhomocysteine lyase OS=Vibrio parahaemolyticus serotype O3:K6 (strain AQ3810) GN=luxS PE=3 SV=1	0	83.1448	73.2558	9	32	9	1	172	19.021	5.08	High	High	High		0.575	1.015	115.8	66.6	117.6	12	12	12	40.246	0	89.9084	9
FALSE	High	Master Protein	A6B0N7	Putative virulence-mediating protein VirC OS=Vibrio parahaemolyticus serotype O3:K6 (strain AQ3810) GN=A79_3461 PE=4 SV=1	0	83.1439	21.1149	12	24	12	1	592	68.132	5.6	High	High	High		1.295	0.982	91.5	118.6	89.9	13	13	13	2.162	0	77.1571	12
FALSE	High	Master Protein	A6B5C6	Phospholipase, patatin family OS=Vibrio parahaemolyticus serotype O3:K6 (strain AQ3810) GN=A79_1711 PE=4 SV=1	0	83.1309	27.4151	10	35	10	1	383	43.283	5.2	High	High	High		1.383	0.744	95.9	132.7	71.4	11	11	11	6.079	0	111.979	10
FALSE	High	Master Protein	A6B6B9	Pyrroline-5-carboxylate reductase OS=Vibrio parahaemolyticus serotype O3:K6 (strain AQ3810) GN=proC PE=3 SV=1	0	83.1116	43.8849	11	30	11	1	278	29.816	5.33	High	High	High		1.174	0.902	97.5	114.5	88	11	11	11	10.659	0	122.152	11
FALSE	High	Master Protein	A6AZ40	Response regulator OS=Vibrio parahaemolyticus serotype O3:K6 (strain AQ3810) GN=A79_4452 PE=4 SV=1	0	82.9267	30.8383	8	26	8	1	334	37.061	4.81	High	High	High		1.411	1.007	87.8	123.9	88.3	11	11	11	9	0	95.2551	8
FALSE	High	Master Protein	A6B7X5	Holliday junction ATP-dependent DNA helicase RuvB OS=Vibrio parahaemolyticus serotype O3:K6 (strain AQ3810) GN=ruvB PE=3 SV=1	0	82.6632	47.9042	13	26	13	1	334	37.203	5.08	High	High	High		1.135	1.036	94.6	107.4	98	13	13	13	4.926	0	83.4369	13
FALSE	High	Master Protein	A6B6V3	Peptide chain release factor 2 OS=Vibrio parahaemolyticus serotype O3:K6 (strain AQ3810) GN=A79_5244 PE=3 SV=1	0	82.6419	41.9231	11	38	11	1	260	29.132	5.9	High	High	High		1.02	1.038	98.1	100.1	101.8	12	12	12	14.399	0	112.312	11
FALSE	High	Master Protein	A6B523	Porphobilinogen deaminase OS=Vibrio parahaemolyticus serotype O3:K6 (strain AQ3810) GN=hemC PE=3 SV=1	0	82.4836	43.5897	8	27	8	1	312	34.093	5.24	High	High	High		0.538	0.947	120.7	65	114.3	8	8	8	4.817	0	105.709	8
FALSE	High	Master Protein	A6B968	Sodium/proline symporter OS=Vibrio parahaemolyticus serotype O3:K6 (strain AQ3810) GN=putP PE=3 SV=1	0	82.3205	14.4869	5	20	5	1	497	53.054	5.68	High	High	High		1.561	1.08	82.4	128.6	89	6	6	6	7.254	0	86.7191	5
FALSE	High	Master Protein	A6B625	Copper-transporting P-type ATPase OS=Vibrio parahaemolyticus serotype O3:K6 (strain AQ3810) GN=A79_5750 PE=3 SV=1	0	82.2782	17.5631	11	23	11	1	911	96.583	5.43	High	High	High		1.31	0.948	92.1	120.6	87.3	11	11	11	1.955	0	81.4598	11
FALSE	High	Master Protein	A6AZX0	Chorismate synthase OS=Vibrio parahaemolyticus serotype O3:K6 (strain AQ3810) GN=aroC PE=3 SV=1	0	82.276	44.8753	12	25	12	1	361	39.07	6.07	High	High	High		0.754	1.066	106.4	80.2	113.4	12	12	12	6.305	0	85.3222	12
FALSE	High	Master Protein	A6B384	Transcriptional regulator, LysR family OS=Vibrio parahaemolyticus serotype O3:K6 (strain AQ3810) GN=A79_0233 PE=4 SV=1	0	82.0848	52.5424	13	23	13	1	295	32.855	6	High	High	High		1.137	0.934	97.7	111.1	91.2	13	13	13	7.859	0	77.437	13
FALSE	High	Master Protein	A6B9P1	Glucose-specific phosphotransferase enzyme IIA component (Fragment) OS=Vibrio parahaemolyticus serotype O3:K6 (strain AQ3810) GN=A79_5599 PE=4 SV=1	0	82.0433	57.0175	5	39	5	1	114	12.227	4.74	High	High	High		0.797	1.084	104.1	83	112.9	6	6	6	70.969	0	158.377	5
FALSE	High	Master Protein	A6B2R2	UDP-N-acetylmuramate--L-alanyl-gamma-D-glutamyl-meso-2,6-diaminoheptandioate ligase OS=Vibrio parahaemolyticus serotype O3:K6 (strain AQ3810) GN=mpl PE=3 SV=1	0	81.9902	22.7876	7	20	7	1	452	49.853	5.63	High	High	High		0.985	1.062	98.5	96.9	104.6	8	8	8	2.675	0	82.4621	7
FALSE	High	Master Protein	A6B6X9	Translation initiation factor IF-3 OS=Vibrio parahaemolyticus serotype O3:K6 (strain AQ3810) GN=infC PE=3 SV=1	0	81.6272	51.1628	7	30	7	1	129	14.895	9.67	High	High	High		0.616	1.018	113.9	70.1	116	8	8	8	137.95	0	113.242	7
FALSE	High	Master Protein	A6B5X0	Uncharacterized protein OS=Vibrio parahaemolyticus serotype O3:K6 (strain AQ3810) GN=A79_3581 PE=4 SV=1	0	81.4381	15.3846	4	20	4	1	299	33.153	4.35	High	High	High		0.836	0.607	122.8	102.7	74.5	8	8	8	41.17	0	86.4037	4
FALSE	High	Master Protein	A6B1P9	Methylmalonate-semialdehyde dehydrogenase OS=Vibrio parahaemolyticus serotype O3:K6 (strain AQ3810) GN=mmsA PE=3 SV=1	0	81.1743	30.5221	14	29	12	1	498	54.466	5.2	High	High	High		1.329	0.981	90.6	120.5	88.9	14	14	14	7.185	2	79.4848	14
FALSE	High	Master Protein	A6B1Q4	3-hydroxyisobutyrate dehydrogenase OS=Vibrio parahaemolyticus serotype O3:K6 (strain AQ3810) GN=mmsB PE=3 SV=1	0	80.9063	49.6667	8	16	8	1	300	31.458	5.54	High	High	High		1.164	0.927	97.1	113	90	8	8	8	6.356	0	69.5741	8
FALSE	High	Master Protein	A6AZI9	HTH-type transcriptional regulator GalR OS=Vibrio parahaemolyticus serotype O3:K6 (strain AQ3810) GN=A79_4299 PE=4 SV=1	0	80.705	40.9639	12	26	12	1	332	36.221	6.15	High	High	High		1.025	0.97	100.2	102.7	97.2	12	12	12	4.484	0	86.4099	12
FALSE	High	Master Protein	A6B7Y4	Nitrogen regulatory protein P-II OS=Vibrio parahaemolyticus serotype O3:K6 (strain AQ3810) GN=A79_3370 PE=3 SV=1	0	80.5091	64.2857	7	30	7	1	112	12.464	4.96	High	High	High		0.449	0.953	124.9	56	119.1	9	9	9	73.989	0	104.294	7
FALSE	High	Master Protein	A6AXW6	Chromosome segregation ATPase OS=Vibrio parahaemolyticus serotype O3:K6 (strain AQ3810) GN=A79_0977 PE=4 SV=1	0	80.4715	46.7213	13	31	13	1	244	27.855	5.24	High	High	High		1.097	0.95	98.5	108	93.5	14	14	14	12.111	0	102.027	13
FALSE	High	Master Protein	A6B3Y0	TPR repeat containing protein OS=Vibrio parahaemolyticus serotype O3:K6 (strain AQ3810) GN=A79_2033 PE=4 SV=1	0	80.3451	43.8163	14	41	14	1	283	33.222	5.01	High	High	High		1.062	0.811	104.4	110.9	84.7	15	15	15	9	0	106.591	14
FALSE	High	Master Protein	A6B290	N-acetyl-D-glucosamine kinase OS=Vibrio parahaemolyticus serotype O3:K6 (strain AQ3810) GN=nagK PE=3 SV=1	0	79.9772	35.4305	10	27	10	1	302	32.755	5.19	High	High	High		0.838	0.859	111.2	93.2	95.6	14	14	14	18.684	0	74.0322	10
FALSE	High	Master Protein	A6B2Z7	2-succinyl-5-enolpyruvyl-6-hydroxy-3-cyclohexene-1-carboxylate synthase OS=Vibrio parahaemolyticus serotype O3:K6 (strain AQ3810) GN=menD PE=3 SV=1	0	79.9702	27.6708	10	20	10	1	571	62.815	6.27	High	High	High		0.95	0.903	105.1	99.9	95	10	10	10	2.162	0	83.7769	10
FALSE	High	Master Protein	A6B5W0	NADPH-dependent 7-cyano-7-deazaguanine reductase OS=Vibrio parahaemolyticus serotype O3:K6 (strain AQ3810) GN=queF PE=3 SV=1	0	79.9012	35.5872	10	28	10	1	281	32.093	5.16	High	High	High		0.834	1.025	104.9	87.5	107.6	10	10	10	9	0	95.8331	10
FALSE	High	Master Protein	A6B0T0	Nuclease SbcCD subunit C OS=Vibrio parahaemolyticus serotype O3:K6 (strain AQ3810) GN=sbcC PE=3 SV=1	0	79.7262	20.9234	19	24	19	1	1018	113.507	5.57	High	High	High		1.001	0.951	101.6	101.7	96.7	19	19	19	0.885	0	75.374	19
FALSE	High	Master Protein	A6B8P8	Poly(A) polymerase OS=Vibrio parahaemolyticus serotype O3:K6 (strain AQ3810) GN=A79_2258 PE=3 SV=1	0	79.7088	48.5714	17	35	17	1	350	41.016	6.87	High	High	High		0.982	0.935	102.8	101	96.2	18	18	18	10.053	0	99.6602	17
FALSE	High	Master Protein	A6B2W0	Bifunctional protein FolD OS=Vibrio parahaemolyticus serotype O3:K6 (strain AQ3810) GN=folD PE=3 SV=1	0	79.6672	47.9021	11	31	11	1	286	30.787	6.04	High	High	High		0.935	0.847	107.8	100.8	91.4	13	13	13	21.758	0	102.3	11
FALSE	High	Master Protein	A6B873	Iron-sulfur cluster carrier protein OS=Vibrio parahaemolyticus serotype O3:K6 (strain AQ3810) GN=A79_4042 PE=3 SV=1	0	79.5946	36.5922	11	27	11	1	358	39.023	6.18	High	High	High		1.382	0.945	90.2	124.6	85.2	12	12	12	5.952	0	102.748	11
FALSE	High	Master Protein	A6AX37	Uncharacterized protein OS=Vibrio parahaemolyticus serotype O3:K6 (strain AQ3810) GN=A79_0477 PE=4 SV=1	0	79.5493	28.6496	16	33	16	1	548	60.902	7.05	High	High	High		1.175	1.004	94.4	110.9	94.8	16	16	16	3.437	0	93.7726	16
FALSE	High	Master Protein	A6B5Q9	Co-chaperone protein DjlA OS=Vibrio parahaemolyticus serotype O3:K6 (strain AQ3810) GN=djlA PE=3 SV=1	0	79.3859	43.662	12	29	12	1	284	31.711	9.48	High	High	High		0.952	0.947	103.5	98.5	98	14	14	14	10.288	0	86.7271	12
FALSE	High	Master Protein	A6B053	Phosphoheptose isomerase OS=Vibrio parahaemolyticus serotype O3:K6 (strain AQ3810) GN=gmhA PE=3 SV=1	0	79.3207	48.6911	9	31	9	1	191	20.795	5.99	High	High	High		0.654	0.974	114.2	74.6	111.2	10	10	10	15.379	0	103.163	9
FALSE	High	Master Protein	A6B029	TyrA protein OS=Vibrio parahaemolyticus serotype O3:K6 (strain AQ3810) GN=A79_2670 PE=4 SV=1	0	79.1195	39.6667	9	18	9	1	300	33.339	5.78	High	High	High		0.676	1.048	110.1	74.5	115.4	10	10	10	4.623	0	64.5597	9
FALSE	High	Master Protein	A6B9I8	50S ribosomal protein L16 OS=Vibrio parahaemolyticus serotype O3:K6 (strain AQ3810) GN=rplP PE=3 SV=1	0	78.9624	49.2647	7	30	7	1	136	15.516	11.33	High	High	High		0.383	1.157	118.1	45.2	136.6	9	9	9	315.228	0	108.568	7
FALSE	High	Master Protein	A6B772	3-hydroxyacyl-[acyl-carrier-protein] dehydratase FabZ OS=Vibrio parahaemolyticus serotype O3:K6 (strain AQ3810) GN=fabZ PE=3 SV=1	0	78.7391	59.3333	8	29	8	1	150	16.828	6.32	High	High	High		0.703	1.026	109.9	77.3	112.7	9	9	9	58.948	0	105.114	8
FALSE	High	Master Protein	A6B9C0	Uncharacterized protein OS=Vibrio parahaemolyticus serotype O3:K6 (strain AQ3810) GN=A79_5377 PE=4 SV=1	0	78.7038	33.7292	12	26	12	1	421	46.536	4.65	High	High	High		0.95	0.997	101.8	96.7	101.5	14	14	14	7.111	0	73.3877	12
FALSE	High	Master Protein	A6B8C7	Single-stranded DNA-binding protein OS=Vibrio parahaemolyticus serotype O3:K6 (strain AQ3810) GN=A79_6320 PE=3 SV=1	0	78.6274	34.6591	8	43	8	1	176	19.551	5.29	High	High	High		0.662	1.025	111.7	73.9	114.5	10	10	10	99	0	117.365	8
FALSE	High	Master Protein	A6B898	Hypothetical ABC transporter ATP-binding protein YadG OS=Vibrio parahaemolyticus serotype O3:K6 (strain AQ3810) GN=A79_0355 PE=4 SV=1	0	78.4547	55.082	14	27	14	1	305	34.258	6.42	High	High	High		1.172	1.09	91.9	107.8	100.3	15	15	15	10.22	0	72.1477	14
FALSE	High	Master Protein	A6B0F0	Oxidoreductase, Gfo/Idh/MocA family OS=Vibrio parahaemolyticus serotype O3:K6 (strain AQ3810) GN=A79_3663 PE=4 SV=1	0	78.3935	36.6559	9	24	9	1	311	35.676	6.84	High	High	High		1.118	0.976	97	108.4	94.7	10	10	10	4.179	0	86.1278	9
FALSE	High	Master Protein	A6B2I9	Formate dehydrogenase, alpha subunit OS=Vibrio parahaemolyticus serotype O3:K6 (strain AQ3810) GN=A79_1269 PE=3 SV=1	0	78.3452	14.4866	16	25	16	1	1422	156.772	5.81	High	High	High		0.725	0.998	110.2	79.9	109.9	16	16	16	0.713	0	81.1965	16
FALSE	High	Master Protein	A6B5Q5	Ribosomal RNA small subunit methyltransferase A OS=Vibrio parahaemolyticus serotype O3:K6 (strain AQ3810) GN=ksgA PE=3 SV=1	0	78.254	43.1227	12	36	12	1	269	30.557	8.16	High	High	High		0.958	1.063	99.3	95.2	105.6	14	14	14	38.811	0	98.9772	12
FALSE	High	Master Protein	A6AZ39	Oxidoreductase YdhF OS=Vibrio parahaemolyticus serotype O3:K6 (strain AQ3810) GN=A79_4451 PE=4 SV=1	0	77.9878	39.404	10	17	10	1	302	33.945	5.54	High	High	High		0.918	1.142	98.1	90	111.9	11	11	11	5.494	0	66.5055	10
FALSE	High	Master Protein	A6B2S4	Octaprenyl-diphosphate synthase (Fragment) OS=Vibrio parahaemolyticus serotype O3:K6 (strain AQ3810) GN=A79_0858 PE=3 SV=1	0	77.9811	40.4332	8	23	8	1	277	30.377	4.72	High	High	High		0.637	1.042	112	71.4	116.6	9	9	9	7.577	0	87.4763	8
FALSE	High	Master Protein	A6B310	Protein TolA OS=Vibrio parahaemolyticus serotype O3:K6 (strain AQ3810) GN=tolA PE=4 SV=1	0	77.8503	36.7978	12	27	12	1	356	40.498	9.33	High	High	High		1.21	0.98	94.1	113.8	92.2	12	12	12	21.758	0	81.2693	12
FALSE	High	Master Protein	A6B5W5	Methionine import ATP-binding protein MetN OS=Vibrio parahaemolyticus serotype O3:K6 (strain AQ3810) GN=metN PE=3 SV=1	0	77.7663	53.7791	13	26	13	1	344	37.544	5.85	High	High	High		1.058	0.949	99.8	105.5	94.7	15	15	15	5.062	0	77.9703	13
FALSE	High	Master Protein	A6B2K6	TonB-dependent receptor OS=Vibrio parahaemolyticus serotype O3:K6 (strain AQ3810) GN=A79_0047 PE=3 SV=1	0	77.6835	19.0531	13	22	13	1	866	93.917	4.53	High	High	High		1.476	0.965	87.2	128.7	84.1	13	13	13	1.404	0	71.9748	13
FALSE	High	Master Protein	A6B266	Membrane-bound lytic murein transglycosylase F OS=Vibrio parahaemolyticus serotype O3:K6 (strain AQ3810) GN=mltF PE=3 SV=1	0	77.2634	31.0476	15	26	15	1	525	59.849	5.33	High	High	High		1.318	1.05	89.1	117.4	93.5	15	15	15	3.417	0	73.724	15
FALSE	High	Master Protein	A6B4J3	Ferredoxin, 2Fe-2S type, ISC system OS=Vibrio parahaemolyticus serotype O3:K6 (strain AQ3810) GN=fdx PE=4 SV=1	0	77.1367	63.3929	5	18	5	1	112	12.279	4.48	High	High	High		0.669	1.044	110.6	74	115.5	6	6	6	20.544	0	76.3095	5
FALSE	High	Master Protein	A6AYT8	Chemotaxis protein CheY OS=Vibrio parahaemolyticus serotype O3:K6 (strain AQ3810) GN=A79_6167 PE=4 SV=1	0	77.0222	66.242	6	22	6	1	157	18.072	4.58	High	High	High		1.444	1.002	87.1	125.7	87.2	6	6	6	25.827	0	96.9185	6
FALSE	High	Master Protein	A6AZY5	Thiol:disulfide interchange protein DsbE OS=Vibrio parahaemolyticus serotype O3:K6 (strain AQ3810) GN=A79_2626 PE=4 SV=1	0	77.0033	52.7174	10	27	10	1	184	20.525	5.59	High	High	High		1.398	0.992	88.5	123.8	87.7	13	13	13	52.367	0	80.1921	10
FALSE	High	Master Protein	A6B7F9	tRNA-dihydrouridine(20/20a) synthase OS=Vibrio parahaemolyticus serotype O3:K6 (strain AQ3810) GN=dusA PE=3 SV=1	0	76.7775	32.8221	7	19	7	1	326	36.512	6.35	High	High	High		0.777	1.039	106.5	82.8	110.7	7	7	7	4.456	0	73.5934	7
FALSE	High	Master Protein	A6B1L6	FAD dependent oxidoreductase, putative OS=Vibrio parahaemolyticus serotype O3:K6 (strain AQ3810) GN=A79_5996 PE=4 SV=1	0	76.4837	35.5392	11	23	11	1	408	45.33	6.74	High	High	High		0.96	0.926	104	99.8	96.3	12	12	12	3.642	0	71.1984	11
FALSE	High	Master Protein	A6B8R7	Peptidyl-prolyl cis-trans isomerase OS=Vibrio parahaemolyticus serotype O3:K6 (strain AQ3810) GN=A79_4937 PE=4 SV=1	0	76.4297	41.4508	4	27	4	1	193	20.448	4.53	High	High	High		0.801	1.114	102.9	82.4	114.7	7	7	7	36.276	0	132.87	4
FALSE	High	Master Protein	A6B815	Cell shape-determining protein MreC OS=Vibrio parahaemolyticus serotype O3:K6 (strain AQ3810) GN=mreC PE=3 SV=1	0	76.3671	40.9396	13	33	13	1	298	33.483	5.94	High	High	High		1.15	0.926	97.5	112.2	90.3	13	13	13	7.859	0	94.6692	13
FALSE	High	Master Protein	A6B3E6	Fatty acid metabolism regulator protein OS=Vibrio parahaemolyticus serotype O3:K6 (strain AQ3810) GN=fadR PE=3 SV=1	0	76.0612	44.8029	11	36	11	1	279	32.049	6.27	High	High	High		1.225	0.962	94.1	115.3	90.5	11	11	11	9	0	120.027	11
FALSE	High	Master Protein	A6AZG0	Outer membrane protein OS=Vibrio parahaemolyticus serotype O3:K6 (strain AQ3810) GN=A79_4270 PE=4 SV=1	0	76.0344	19.8529	4	48	4	1	272	30.28	5.34	High	High	High		1.173	1.013	94.1	110.4	95.4	6	6	6	9	0	164.096	4
FALSE	High	Master Protein	A6AZ03	Uncharacterized protein OS=Vibrio parahaemolyticus serotype O3:K6 (strain AQ3810) GN=A79_6234 PE=4 SV=1	0	76.0253	36.1257	7	28	7	1	191	21.482	4.93	High	High	High		0.801	0.938	109.5	87.7	102.7	9	9	9	25.102	0	81.8589	7
FALSE	High	Master Protein	A6B5N3	Chemotaxis signal transduction protein OS=Vibrio parahaemolyticus serotype O3:K6 (strain AQ3810) GN=A79_1729 PE=4 SV=1	0	75.9477	42.4342	9	19	9	1	304	33.869	5.4	High	High	High		0.962	0.856	106.4	102.4	91.2	11	11	11	5.31	0	64.6743	9
FALSE	High	Master Protein	A6B9N7	Threonine synthase OS=Vibrio parahaemolyticus serotype O3:K6 (strain AQ3810) GN=A79_3229 PE=4 SV=1	0	75.8208	80.8612	11	23	11	1	209	23.01	4.92	High	High	High		0.97	1.081	98.3	95.4	106.3	11	11	11	19.309	0	74.1622	11
FALSE	High	Master Protein	A6B4Y6	Methyl-accepting chemotaxis protein OS=Vibrio parahaemolyticus serotype O3:K6 (strain AQ3810) GN=A79_3072 PE=4 SV=1	0	75.6878	21.6814	14	27	13	1	678	74.036	5.1	High	High	High		1.048	1.135	94.3	98.7	107	14	14	14	1.976	0	76.9936	14
FALSE	High	Master Protein	A6AZI0	Glycerol-3-phosphate transporter OS=Vibrio parahaemolyticus serotype O3:K6 (strain AQ3810) GN=glpT PE=4 SV=1	0	75.5727	17.3246	9	43	9	1	456	50.895	6.86	High	High	High		1.095	1.095	94	103	103	12	12	12	9	0	116.04	9
FALSE	High	Master Protein	A6B534	Uncharacterized protein OS=Vibrio parahaemolyticus serotype O3:K6 (strain AQ3810) GN=A79_5781 PE=4 SV=1	0	75.5334	31.6742	11	19	11	1	442	49.128	5.69	High	High	High		0.81	0.89	111.1	90	98.9	11	11	11	4.012	0	73.663	11
FALSE	High	Master Protein	A6B1W0	HTH domain family OS=Vibrio parahaemolyticus serotype O3:K6 (strain AQ3810) GN=A79_5935 PE=4 SV=1	0	75.4184	41.9608	8	19	8	1	255	29.484	5.4	High	High	High		1.15	1.088	92.7	106.6	100.8	9	9	9	5.494	0	72.9879	8
FALSE	High	Master Protein	A6B2N6	Peptidyl-prolyl cis-trans isomerase OS=Vibrio parahaemolyticus serotype O3:K6 (strain AQ3810) GN=A79_0820 PE=4 SV=1	0	75.4113	42.268	5	22	4	1	194	20.686	4.59	High	High	High		0.791	1.19	100.6	79.6	119.8	6	6	6	30.623	0	93.3	5
FALSE	High	Master Protein	A6B426	Membrane protein (Fragment) OS=Vibrio parahaemolyticus serotype O3:K6 (strain AQ3810) GN=A79_5350 PE=4 SV=1	0	75.0641	31.7536	11	20	11	1	422	47.644	9.83	High	High	High		1.183	0.915	96.8	114.5	88.6	13	13	13	2.29	0	66.1429	11
FALSE	High	Master Protein	A6AX17	Diguanylate cyclase (GGDEF) domain protein OS=Vibrio parahaemolyticus serotype O3:K6 (strain AQ3810) GN=A79_0456 PE=4 SV=1	0	75.0113	33.5863	13	20	13	1	527	59.804	6.77	High	High	High		0.898	0.911	106.8	95.9	97.3	12	12	12	1.548	0	75.6257	13
FALSE	High	Master Protein	A6B3U3	Sensory transduction protein kinase OS=Vibrio parahaemolyticus serotype O3:K6 (strain AQ3810) GN=A79_2952 PE=4 SV=1	0	74.9816	31.9588	17	27	17	1	679	77.1	6.05	High	High	High		0.901	0.881	107.9	97.2	95	17	17	17	2.162	0	84.8109	17
FALSE	High	Master Protein	A6B6X4	Transcriptional regulator OS=Vibrio parahaemolyticus serotype O3:K6 (strain AQ3810) GN=A79_1217 PE=4 SV=1	0	74.9571	48.0916	11	24	11	1	262	29.406	6.55	High	High	High		1.108	0.909	99.4	110.2	90.4	12	12	12	12.111	0	79.3899	11
FALSE	High	Master Protein	A6B7D1	CinA-like protein OS=Vibrio parahaemolyticus serotype O3:K6 (strain AQ3810) GN=A79_6379 PE=3 SV=1	0	74.5062	29.7561	11	26	11	1	410	45.317	5.62	High	High	High		1.278	0.985	92	117.5	90.6	12	12	12	4.623	0	76.951	11
FALSE	High	Master Protein	A6B867	Histidine kinase OS=Vibrio parahaemolyticus serotype O3:K6 (strain AQ3810) GN=A79_1634 PE=4 SV=1	0	74.4846	21.1373	14	23	14	1	932	104.128	5.14	High	High	High		1.221	0.989	93.5	114.1	92.4	14	14	14	1.254	0	77.3322	14
FALSE	High	Master Protein	A6BAP8	Secreted protease (Fragment) OS=Vibrio parahaemolyticus serotype O3:K6 (strain AQ3810) GN=A79_4021 PE=4 SV=1	0	74.4809	56.7708	9	32	2	1	192	21.1	8.34	High	High	High		0.943	1.018	101.3	95.5	103.1	2	2	2	16.013	0	111.64	9
FALSE	High	Master Protein	A6B352	Isocitrate lyase OS=Vibrio parahaemolyticus serotype O3:K6 (strain AQ3810) GN=aceA PE=4 SV=1	0	74.4312	39.6789	11	21	10	1	436	48.039	5.11	High	High	High		0.878	1.365	92.5	81.2	126.3	12	12	12	2.775	1	70.3692	11
FALSE	High	Master Protein	A6B7M7	C4-dicarboxylate transport transcriptional regulatory protein DctD (Fragment) OS=Vibrio parahaemolyticus serotype O3:K6 (strain AQ3810) GN=A79_5222 PE=4 SV=1	0	74.2412	24.3619	8	16	8	1	431	47.918	5.07	High	High	High		1.177	0.943	96.1	113.2	90.6	8	8	8	2.675	0	66.3587	8
FALSE	High	Master Protein	A6B3T8	Lipoprotein NlpI OS=Vibrio parahaemolyticus serotype O3:K6 (strain AQ3810) GN=A79_2947 PE=4 SV=1	0	74.1858	41.5033	10	28	10	1	306	35.334	5.01	High	High	High		1.169	1.05	93.2	109	97.8	10	10	10	7.66	0	93.8786	10
FALSE	High	Master Protein	A6B5B5	Cytochrome c4 OS=Vibrio parahaemolyticus serotype O3:K6 (strain AQ3810) GN=A79_3262 PE=4 SV=1	0	74.0737	47.3171	8	38	8	1	205	21.884	6.99	High	High	High		1.251	0.903	95.1	119	85.9	13	13	13	37.312	0	88.5633	8
FALSE	High	Master Protein	A6AZT6	Putative AcrA/AcrE family protein OS=Vibrio parahaemolyticus serotype O3:K6 (strain AQ3810) GN=A79_3160 PE=3 SV=1	0	74.0338	43.0199	10	20	10	1	351	38.495	5.19	High	High	High		1.299	0.862	94.9	123.3	81.8	11	11	11	4.456	0	72.8261	10
FALSE	High	Master Protein	A6B658	Low-affinity zinc transport protein OS=Vibrio parahaemolyticus serotype O3:K6 (strain AQ3810) GN=A79_4385 PE=4 SV=1	0	73.9579	32.3171	8	21	8	1	328	36.212	4.93	High	High	High		1.198	0.961	95	113.8	91.3	10	10	10	5.661	0	71.6914	8
FALSE	High	Master Protein	A6B5R1	3-isopropylmalate dehydratase small subunit OS=Vibrio parahaemolyticus serotype O3:K6 (strain AQ3810) GN=leuD PE=3 SV=1	0	73.9497	61	9	20	9	1	200	22.577	4.93	High	High	High		0.797	1.005	107.1	85.4	107.6	11	11	11	22.101	0	65.841	9
FALSE	High	Master Protein	A6B3S2	Histidinol-phosphate aminotransferase OS=Vibrio parahaemolyticus serotype O3:K6 (strain AQ3810) GN=hisC PE=3 SV=1	0	73.5642	34.104	11	25	11	1	346	38.246	4.97	High	High	High		0.931	0.942	104.4	97.2	98.3	11	11	11	5.31	0	87.9462	11
FALSE	High	Master Protein	A6AZ87	HTH-type transcriptional regulator BetI OS=Vibrio parahaemolyticus serotype O3:K6 (strain AQ3810) GN=betI PE=3 SV=1	0	73.5617	53.7688	10	37	10	1	199	22.395	9.7	High	High	High		0.657	0.532	137	90	72.9	11	11	11	17.478	0	93.098	10
FALSE	High	Master Protein	A6B9Q8	Cyclic AMP phosphodiesterase (Fragment) OS=Vibrio parahaemolyticus serotype O3:K6 (strain AQ3810) GN=A79_4964 PE=3 SV=1	0	73.5073	40.1361	8	13	8	1	294	32.623	6.35	High	High	High		0.918	0.866	107.7	98.9	93.3	8	8	8	4.817	0	52.6095	8
FALSE	High	Master Protein	A6B103	ATP-dependent helicase DinG OS=Vibrio parahaemolyticus serotype O3:K6 (strain AQ3810) GN=A79_6067 PE=4 SV=1	0	73.402	24.602	15	24	15	1	691	77.701	8.25	High	High	High		1.014	0.886	103.4	104.9	91.6	16	16	16	1.644	0	62.7622	15
FALSE	High	Master Protein	A6AZ46	Electron transfer flavoprotein, beta-subunit OS=Vibrio parahaemolyticus serotype O3:K6 (strain AQ3810) GN=A79_4458 PE=4 SV=1	0	72.9625	50.4	11	23	11	1	250	27.393	5.29	High	High	High		1.252	0.817	97.7	122.4	79.9	11	11	11	12.895	0	76.6263	11
FALSE	High	Master Protein	A6B7B4	Phosphoribulokinase OS=Vibrio parahaemolyticus serotype O3:K6 (strain AQ3810) GN=cbbP PE=4 SV=1	0	72.8539	38.0623	8	23	8	1	289	32.737	6.7	High	High	High		1.325	0.994	90.4	119.8	89.8	9	9	9	13.251	0	82.7409	8
FALSE	High	Master Protein	A6B5G8	Agglutination protein OS=Vibrio parahaemolyticus serotype O3:K6 (strain AQ3810) GN=A79_3989 PE=4 SV=1	0	72.3779	28.2609	14	27	10	1	460	51.705	5.44	High	High	High		1.275	0.892	94.7	120.8	84.5	10	10	10	3.894	0	77.2789	14
FALSE	High	Master Protein	A6B5V1	Hydrogen peroxide-inducible genes activator OS=Vibrio parahaemolyticus serotype O3:K6 (strain AQ3810) GN=A79_1363 PE=4 SV=1	0	72.2783	42.3841	9	17	9	1	302	33.06	6.05	High	High	High		0.943	1.059	100	94.2	105.8	9	9	9	3.833	0	69.8077	9
FALSE	High	Master Protein	A6AYW9	Uncharacterized protein OS=Vibrio parahaemolyticus serotype O3:K6 (strain AQ3810) GN=A79_6200 PE=4 SV=1	0	72.1652	30.4348	7	16	7	1	368	39.554	4.97	High	High	High		0.583	1.356	102.1	59.5	138.4	7	7	7	2.899	0	58.4978	7
FALSE	High	Master Protein	A6B1F3	Trimethylamine-N-oxide reductase TorA OS=Vibrio parahaemolyticus serotype O3:K6 (strain AQ3810) GN=torA PE=3 SV=1	0	72.017	25.8537	18	22	18	1	820	92.483	7.28	High	High	High		0.892	1.084	100.8	89.9	109.3	19	19	19	1.703	0	57.7625	18
FALSE	High	Master Protein	A6B4T3	ATP-dependent DNA helicase Rep OS=Vibrio parahaemolyticus serotype O3:K6 (strain AQ3810) GN=rep PE=3 SV=1	0	71.84	27.5708	18	22	16	1	671	77.305	6.6	High	High	High		0.867	0.918	107.7	93.4	98.9	18	18	18	1.783	2	57.1441	18
FALSE	High	Master Protein	A6BB70	Riboflavin synthase, alpha subunit OS=Vibrio parahaemolyticus serotype O3:K6 (strain AQ3810) GN=ribE PE=4 SV=1	0	71.7727	44.8276	9	23	9	1	203	22.449	5.15	High	High	High		0.836	1.061	103.6	86.6	109.8	9	9	9	13.251	0	78.2012	9
FALSE	High	Master Protein	A6B6R2	Uroporphyrin-III C-methyltransferase OS=Vibrio parahaemolyticus serotype O3:K6 (strain AQ3810) GN=A79_3355 PE=4 SV=1	0	71.7664	50	12	16	12	1	306	34.643	6.93	High	High	High		1.022	0.922	101.9	104.1	94	13	13	13	5.813	0	58.3529	12
FALSE	High	Master Protein	A6AZ45	Electron transfer flavoprotein, alpha-subunit OS=Vibrio parahaemolyticus serotype O3:K6 (strain AQ3810) GN=A79_4457 PE=4 SV=1	0	71.5468	32.1429	6	15	6	1	308	32.504	4.93	High	High	High		1.366	0.849	93.3	127.5	79.2	6	6	6	4.412	0	67.9852	6
FALSE	High	Master Protein	A6B6S3	D-alanyl-D-alanine carboxypeptidase OS=Vibrio parahaemolyticus serotype O3:K6 (strain AQ3810) GN=A79_4811 PE=3 SV=1	0	71.5454	30.9091	9	16	9	1	385	42.15	8.25	High	High	High		0.944	0.972	102.9	97.1	100	9	9	9	2.675	0	55.0816	9
FALSE	High	Master Protein	A6B5D4	Thymidylate kinase OS=Vibrio parahaemolyticus serotype O3:K6 (strain AQ3810) GN=tmk PE=3 SV=1	0	71.4825	47.3684	8	25	8	1	209	23.412	5.02	High	High	High		1.016	1.1	96.3	97.8	105.9	8	8	8	9	0	80.2885	8
FALSE	High	Master Protein	A6B296	Extracellular tungstate binding protein OS=Vibrio parahaemolyticus serotype O3:K6 (strain AQ3810) GN=A79_5108 PE=4 SV=1	0	71.4556	38.2353	10	19	10	1	272	30.085	6.57	High	High	High		0.411	0.912	129.1	53.1	117.8	10	10	10	4.623	0	60.7672	10
FALSE	High	Master Protein	A6B777	1-deoxy-D-xylulose 5-phosphate reductoisomerase OS=Vibrio parahaemolyticus serotype O3:K6 (strain AQ3810) GN=dxr PE=3 SV=1	0	71.3972	44.8878	12	25	12	1	401	43.082	5.25	High	High	High		0.753	0.994	109.2	82.3	108.5	12	12	12	5.952	0	71.5552	12
FALSE	High	Master Protein	A6B6G2	UPF0283 membrane protein A79_5663 OS=Vibrio parahaemolyticus serotype O3:K6 (strain AQ3810) GN=A79_5663 PE=3 SV=1	0	71.3965	21.0983	7	22	7	1	346	37.736	7.53	High	High	High		1.126	0.93	98.2	110.5	91.3	8	8	8	10.788	0	62.6033	7
FALSE	High	Master Protein	A6B2L3	Guanylate kinase OS=Vibrio parahaemolyticus serotype O3:K6 (strain AQ3810) GN=gmk PE=3 SV=1	0	71.3895	46.3768	8	20	8	1	207	23.431	5.38	High	High	High		0.757	1.015	108.2	81.9	109.9	10	10	10	9	0	69.8939	8
FALSE	High	Master Protein	A6B211	Cytochrome c oxidase accessory protein CcoG OS=Vibrio parahaemolyticus serotype O3:K6 (strain AQ3810) GN=ccoG PE=4 SV=1	0	71.3057	27.907	11	19	11	1	473	53.96	8.62	High	High	High		0.96	0.961	102.7	98.6	98.7	13	13	13	6.079	0	48.9439	11
FALSE	High	Master Protein	A6B9W8	4-hydroxy-4-methyl-2-oxoglutarate aldolase OS=Vibrio parahaemolyticus serotype O3:K6 (strain AQ3810) GN=A79_2929 PE=3 SV=1	0	71.207	59.375	6	17	6	1	160	17.697	5.15	High	High	High		1.239	1.131	89	110.3	100.7	7	7	7	15.681	0	66.2981	6
FALSE	High	Master Protein	A6B1H3	Cystathionine beta-lyase OS=Vibrio parahaemolyticus serotype O3:K6 (strain AQ3810) GN=metC PE=3 SV=1	0	71.1231	35.5721	12	29	12	1	402	44.536	5.91	High	High	High		0.948	0.981	102.4	97.1	100.5	13	13	13	5.7	0	82.561	12
FALSE	High	Master Protein	A6B3H3	Putative gluconeogenesis factor OS=Vibrio parahaemolyticus serotype O3:K6 (strain AQ3810) GN=A79_1195 PE=3 SV=1	0	71.0203	34.0067	10	21	10	1	297	32.254	5.72	High	High	High		1.132	1.035	94.7	107.2	98	11	11	11	7.733	0	79.3296	10
FALSE	High	Master Protein	A6B9C3	Dihydroorotase (Fragment) OS=Vibrio parahaemolyticus serotype O3:K6 (strain AQ3810) GN=pyrC PE=3 SV=1	0	70.8831	36.6864	7	15	7	1	338	37.332	5.92	High	High	High		0.752	1.077	106	79.8	114.2	8	8	8	3.87	0	61.2928	7
FALSE	High	Master Protein	A6BAK5	Hit family protein OS=Vibrio parahaemolyticus serotype O3:K6 (strain AQ3810) GN=A79_0360 PE=4 SV=1	0	70.6768	54.3103	6	28	6	1	116	12.98	5.74	High	High	High		1.135	0.843	100.8	114.4	84.9	7	7	7	137.95	0	87.4918	6
FALSE	High	Master Protein	A6AX15	Multidrug resistance efflux pump OS=Vibrio parahaemolyticus serotype O3:K6 (strain AQ3810) GN=A79_0454 PE=4 SV=1	0	70.6283	30.0532	10	22	10	1	376	41.564	6.19	High	High	High		1.089	0.919	99.7	108.6	91.6	10	10	10	5.813	0	67.406	10
FALSE	High	Master Protein	A6AZX1	50S ribosomal protein L3 glutamine methyltransferase OS=Vibrio parahaemolyticus serotype O3:K6 (strain AQ3810) GN=prmB PE=3 SV=1	0	70.3996	35.8065	6	22	6	1	310	35.247	4.65	High	High	High		1.118	1.109	93	104	103.1	7	7	7	22.714	0	93.1577	6
FALSE	High	Master Protein	A6B3C1	Methyl-accepting chemotaxis protein OS=Vibrio parahaemolyticus serotype O3:K6 (strain AQ3810) GN=A79_3190 PE=4 SV=1	0	70.3746	18.3386	8	22	7	1	638	68.6	4.94	High	High	High		1.047	0.939	100.5	105.2	94.3	7	7	7	1.783	0	79.5602	8
FALSE	High	Master Protein	A6B3H1	Molybdenum cofactor biosynthesis protein B OS=Vibrio parahaemolyticus serotype O3:K6 (strain AQ3810) GN=moaB PE=3 SV=1	0	70.1822	45.8824	6	21	6	1	170	18.72	5.74	High	High	High		0.926	1.048	100.9	93.4	105.7	8	8	8	11.328	0	84.8066	6
FALSE	High	Master Protein	A6B1F9	Peptide transport system ATP-binding protein SapD OS=Vibrio parahaemolyticus serotype O3:K6 (strain AQ3810) GN=A79_0163 PE=3 SV=1	0	70.1789	38.9728	10	20	10	1	331	37.537	9.03	High	High	High		0.959	1.019	100.7	96.6	102.7	10	10	10	4.179	0	68.0077	10
FALSE	High	Master Protein	A6B6V7	Oxidoreductase Tas, aldo/keto reductase family OS=Vibrio parahaemolyticus serotype O3:K6 (strain AQ3810) GN=A79_5248 PE=4 SV=1	0	70.1345	31.3953	9	22	9	1	344	38.784	6.13	High	High	High		1.021	1.017	98.7	100.8	100.4	12	12	12	7.859	0	71.8246	9
FALSE	High	Master Protein	A6BCC2	Uncharacterized protein (Fragment) OS=Vibrio parahaemolyticus serotype O3:K6 (strain AQ3810) GN=A79_5586 PE=4 SV=1	0	69.9573	64.2458	8	18	8	1	179	20.385	7.61	High	High	High		1.257	0.81	97.8	122.9	79.2	9	9	9	9	0	67.3585	8
FALSE	High	Master Protein	A6B9A7	P-protein OS=Vibrio parahaemolyticus serotype O3:K6 (strain AQ3810) GN=A79_0811 PE=4 SV=1	0	69.8327	35.2041	13	17	13	1	392	44.196	6.76	High	High	High		0.833	0.927	108.7	90.5	100.7	13	13	13	3.806	0	53.167	13
FALSE	High	Master Protein	A6B278	Glutamate 5-kinase (Fragment) OS=Vibrio parahaemolyticus serotype O3:K6 (strain AQ3810) GN=proB PE=3 SV=1	0	69.8035	42.0408	9	20	9	1	245	25.864	6.35	High	High	High		0.862	1.111	100.9	87	112.1	9	9	9	5.952	0	68.9395	9
FALSE	High	Master Protein	A6AZF1	Ribosomal RNA large subunit methyltransferase G OS=Vibrio parahaemolyticus serotype O3:K6 (strain AQ3810) GN=rlmG PE=3 SV=1	0	69.7605	32.7273	12	24	12	1	385	43.179	7.56	High	High	High		1.037	1.012	98.4	102	99.6	13	13	13	4.926	0	72.2516	12
FALSE	High	Master Protein	A6BAR6	General secretion pathway protein E (Fragment) OS=Vibrio parahaemolyticus serotype O3:K6 (strain AQ3810) GN=A79_3639 PE=4 SV=1	0	69.7127	45.0128	11	23	4	1	391	43.742	7.12	High	High	High		1.179	1.032	93.4	110.1	96.4	12	12	12	4.337	8	78.9774	11
FALSE	High	Master Protein	A6B1S8	Pyruvate dehydrogenase E1 component, alpha subunit OS=Vibrio parahaemolyticus serotype O3:K6 (strain AQ3810) GN=pdhA PE=4 SV=1	0	69.6439	45.4545	12	21	12	1	363	40.541	5.47	High	High	High		1.318	0.958	91.6	120.7	87.7	12	12	12	4.926	0	52.431	12
FALSE	High	Master Protein	A6B5R2	3-isopropylmalate dehydratase large subunit OS=Vibrio parahaemolyticus serotype O3:K6 (strain AQ3810) GN=leuC PE=3 SV=1	0	69.5419	32.6964	12	17	12	1	471	50.586	5.92	High	High	High		0.845	1.028	104.4	88.2	107.3	12	12	12	2.831	0	60.3992	12
FALSE	High	Master Protein	A6B964	Transport ATP-binding protein CydD OS=Vibrio parahaemolyticus serotype O3:K6 (strain AQ3810) GN=A79_4730 PE=4 SV=1	0	69.478	35.9375	9	19	9	1	320	34.793	4.86	High	High	High		1.057	0.976	98.9	104.5	96.5	10	10	10	6.627	0	65.6075	9
FALSE	High	Master Protein	A6B1S6	Dihydrolipoamide acetyltransferase OS=Vibrio parahaemolyticus serotype O3:K6 (strain AQ3810) GN=A79_5300 PE=3 SV=1	0	69.3915	34.8958	11	21	11	1	384	41.422	5.91	High	High	High		1.524	0.909	87.4	133.1	79.5	12	12	12	5.449	0	61.4438	11
FALSE	High	Master Protein	A6B6E7	tRNA pseudouridine synthase D OS=Vibrio parahaemolyticus serotype O3:K6 (strain AQ3810) GN=truD PE=3 SV=1	0	68.9101	30.2594	8	17	8	1	347	38.677	5.95	High	High	High		0.882	1.056	102.1	90	107.9	8	8	8	3.642	0	61.3744	8
FALSE	High	Master Protein	A6B5M5	Hydrolase OS=Vibrio parahaemolyticus serotype O3:K6 (strain AQ3810) GN=A79_5863 PE=4 SV=1	0	68.8103	35.5805	9	20	9	1	267	30.185	5.08	High	High	High		0.929	0.988	102.9	95.5	101.6	11	11	11	9	0	64.498	9
FALSE	High	Master Protein	A6BAR9	1-(5-phosphoribosyl)-5-[(5-phosphoribosylamino)methylideneamino] imidazole-4-carboxamide isomerase (Fragment) OS=Vibrio parahaemolyticus serotype O3:K6 (strain AQ3810) GN=A79_2470 PE=3 SV=1	0	68.7939	30.1775	8	18	1	1	338	36.124	4.94	High	High	High		1.201	0.797	100.1	120.2	79.8	1	1	1	5.661	0	57.4601	8
FALSE	High	Master Protein	A6B517	DNA helicase OS=Vibrio parahaemolyticus serotype O3:K6 (strain AQ3810) GN=A79_0278 PE=3 SV=1	0	68.7689	24.8186	15	24	15	1	689	79.551	6.93	High	High	High		0.896	0.861	108.8	97.5	93.7	15	15	15	1.588	0	65.4126	15
FALSE	High	Master Protein	A6B339	Iron-sulfur cluster assembly scaffold protein IscU (Fragment) OS=Vibrio parahaemolyticus serotype O3:K6 (strain AQ3810) GN=iscU PE=3 SV=1	0	68.7378	75.4237	7	27	7	1	118	12.489	4.84	High	High	High		0.639	0.937	116.4	74.4	109.1	8	8	8	26.826	0	92.2603	7
FALSE	High	Master Protein	A6B222	Peptide deformylase OS=Vibrio parahaemolyticus serotype O3:K6 (strain AQ3810) GN=def PE=3 SV=1	0	68.6719	56.9767	7	19	7	1	172	19.393	5.05	High	High	High		0.498	1.045	118	58.7	123.3	7	7	7	11.915	0	73.1801	7
FALSE	High	Master Protein	A6B8B1	ABC-type dipeptide transport system, periplasmic component OS=Vibrio parahaemolyticus serotype O3:K6 (strain AQ3810) GN=A79_5914 PE=4 SV=1	0	68.6513	25.817	13	23	12	1	612	70.419	6.55	High	High	High		0.53	0.963	120.3	63.8	115.9	14	14	14	2.282	1	78.9584	13
FALSE	High	Master Protein	A6B057	DNA polymerase III, epsilon subunit OS=Vibrio parahaemolyticus serotype O3:K6 (strain AQ3810) GN=dnaQ PE=4 SV=1	0	68.5656	53.3333	11	19	11	1	240	27.194	5.73	High	High	High		0.924	0.976	103.4	95.6	101	11	11	11	9	0	63.6371	11
FALSE	High	Master Protein	A6AZY6	Cytochrome c-type biogenesis protein CcmF OS=Vibrio parahaemolyticus serotype O3:K6 (strain AQ3810) GN=ccmF PE=4 SV=1	0	68.5606	14.4377	8	29	8	1	658	73.692	9.45	High	High	High		1.184	0.954	95.6	113.2	91.2	11	11	11	4.337	0	80.1394	8
FALSE	High	Master Protein	A6B2M1	Osmolarity response regulator OS=Vibrio parahaemolyticus serotype O3:K6 (strain AQ3810) GN=A79_0062 PE=4 SV=1	0	68.4966	53.9749	13	26	13	1	239	27.345	6.06	High	High	High		1.153	1.073	93	107.2	99.8	14	14	14	10.365	0	77.5638	13
FALSE	High	Master Protein	A6AZW4	tRNA 5-methylaminomethyl-2-thiouridine biosynthesis bifunctional protein MnmC OS=Vibrio parahaemolyticus serotype O3:K6 (strain AQ3810) GN=mnmC PE=3 SV=1	0	68.3891	22.4702	14	24	14	1	672	75.582	5.49	High	High	High		0.922	0.907	106	97.8	96.2	14	14	14	2.262	0	71.4003	14
FALSE	High	Master Protein	A6B019	Two-component response regulator OS=Vibrio parahaemolyticus serotype O3:K6 (strain AQ3810) GN=A79_2660 PE=4 SV=1	0	68.1613	23.8806	8	17	7	1	469	51.428	5.11	High	High	High		0.815	1.074	103.8	84.6	111.5	7	7	7	2.008	0	61.305	8
FALSE	High	Master Protein	A6B8X8	DNA gyrase/topoisomerase IV, A subunit OS=Vibrio parahaemolyticus serotype O3:K6 (strain AQ3810) GN=A79_2276 PE=4 SV=1	0	68.0269	33.2168	7	27	7	1	286	31.942	9.03	High	High	High		1.126	1.071	93.8	105.7	100.5	8	8	8	5.661	0	83.6317	7
FALSE	High	Master Protein	A6B8N1	General secretion pathway protein F OS=Vibrio parahaemolyticus serotype O3:K6 (strain AQ3810) GN=gspF PE=3 SV=1	0	67.9933	30.1235	11	27	11	1	405	44.565	9.13	High	High	High		1.013	0.994	99.8	101.1	99.2	11	11	11	5.579	0	76.7764	11
FALSE	High	Master Protein	A6B811	Uncharacterized protein (Fragment) OS=Vibrio parahaemolyticus serotype O3:K6 (strain AQ3810) GN=A79_1276 PE=4 SV=1	0	67.9375	15.4292	10	14	10	1	862	96.102	4.74	High	High	High		1.154	0.987	95.5	110.2	94.3	11	11	11	1.081	0	50.6802	10
FALSE	High	Master Protein	A6B175	Peptidyl-prolyl cis-trans isomerase OS=Vibrio parahaemolyticus serotype O3:K6 (strain AQ3810) GN=A79_1858 PE=4 SV=1	0	67.8571	29.2994	4	20	4	1	157	17.35	6.95	High	High	High		1.163	1.006	94.7	110.1	95.2	7	7	7	17.738	0	59.0135	4
FALSE	High	Master Protein	A6BAY4	30S ribosomal protein S9 OS=Vibrio parahaemolyticus serotype O3:K6 (strain AQ3810) GN=rpsI PE=3 SV=1	0	67.8369	46.1538	5	43	5	1	130	14.605	10.67	High	High	High		0.441	0.935	126.3	55.7	118.1	8	8	8	45.416	0	131.42	5
FALSE	High	Master Protein	A6B6M9	Toluene tolerance protein Ttg2D OS=Vibrio parahaemolyticus serotype O3:K6 (strain AQ3810) GN=ttg2D PE=4 SV=1	0	67.7252	32.0755	5	16	5	1	212	24.075	5.88	High	High	High		0.47	1.113	116.1	54.6	129.2	6	6	6	7.377	0	60.9571	5
FALSE	High	Master Protein	A6B6F8	Para-aminobenzoate synthase component 1 OS=Vibrio parahaemolyticus serotype O3:K6 (strain AQ3810) GN=A79_5659 PE=4 SV=1	0	67.6	29.0865	10	21	6	1	416	46.952	5.02	High	High	High		0.879	0.906	107.7	94.7	97.6	10	10	10	3.329	4	73.729	10
FALSE	High	Master Protein	A6AYX6	Xaa-Pro aminopeptidase OS=Vibrio parahaemolyticus serotype O3:K6 (strain AQ3810) GN=A79_6207 PE=4 SV=1	0	67.5989	16.2207	8	17	8	1	598	67.114	5.43	High	High	High		1.08	1.234	90.5	97.8	111.7	10	10	10	2.162	0	52.343	8
FALSE	High	Master Protein	A6B608	Protein YhdH OS=Vibrio parahaemolyticus serotype O3:K6 (strain AQ3810) GN=A79_3913 PE=4 SV=1	0	67.54	45.092	12	23	11	1	326	34.894	4.97	High	High	High		1.053	0.982	98.9	104.1	97.1	12	12	12	10.548	1	59.0403	12
FALSE	High	Master Protein	A6B2N4	Type II secretion system protein L OS=Vibrio parahaemolyticus serotype O3:K6 (strain AQ3810) GN=gspL PE=3 SV=1	0	67.2954	28.25	10	26	10	1	400	44.827	5.31	High	High	High		1.241	1.042	91.4	113.4	95.2	10	10	10	4.623	0	80.8946	10
FALSE	High	Master Protein	A6BAY5	50S ribosomal protein L13 OS=Vibrio parahaemolyticus serotype O3:K6 (strain AQ3810) GN=rplM PE=3 SV=1	0	67.2053	47.8873	5	41	5	1	142	15.951	9.64	High	High	High		0.47	1.144	114.8	53.9	131.3	8	8	8	34.938	0	145.694	5
FALSE	High	Master Protein	A6B3T1	Ribosome maturation factor RimP OS=Vibrio parahaemolyticus serotype O3:K6 (strain AQ3810) GN=rimP PE=3 SV=1	0	66.9157	50.3311	4	19	4	1	151	16.608	4.94	High	High	High		1.192	1.004	93.9	111.9	94.3	6	6	6	18.307	0	78.5239	4
FALSE	High	Master Protein	A6B6M3	Aspartate carbamoyltransferase regulatory chain OS=Vibrio parahaemolyticus serotype O3:K6 (strain AQ3810) GN=pyrI PE=3 SV=1	0	66.8884	47.7124	8	32	8	1	153	17.394	7.01	High	High	High		0.866	0.838	110.9	96.1	93	8	8	8	45.416	0	105.67	8
FALSE	High	Master Protein	A6B408	ToxRS operon OS=Vibrio parahaemolyticus serotype O3:K6 (strain AQ3810) GN=A79_2290 PE=4 SV=1	0	66.8837	37.6712	7	19	7	1	292	32.587	4.81	High	High	High		1.113	1.015	95.9	106.7	97.4	7	7	7	4.179	0	87.5036	7
FALSE	High	Master Protein	A6B970	Bifunctional protein PutA (Fragment) OS=Vibrio parahaemolyticus serotype O3:K6 (strain AQ3810) GN=A79_1686 PE=4 SV=1	0	66.8424	80.5556	5	60	5	1	72	7.879	9.38	High	High	High		1.58	0.892	86.4	136.5	77.1	7	7	7	214.443	0	170.321	5
FALSE	High	Master Protein	A6B313	Tol system periplasmic component YbgF OS=Vibrio parahaemolyticus serotype O3:K6 (strain AQ3810) GN=A79_2435 PE=4 SV=1	0	66.6666	34.6614	7	18	7	1	251	28.229	9.26	High	High	High		0.529	0.978	119.7	63.3	117	8	8	8	6.356	0	64.2956	7
FALSE	High	Master Protein	A6AZB9	Ribose operon repressor OS=Vibrio parahaemolyticus serotype O3:K6 (strain AQ3810) GN=A79_4532 PE=4 SV=1	0	66.6459	47.1642	13	20	13	1	335	37.308	6.55	High	High	High		1.034	0.84	104.4	107.9	87.7	14	14	14	5.449	0	49.1242	13
FALSE	High	Master Protein	A6B081	Zinc-carboxypeptidase OS=Vibrio parahaemolyticus serotype O3:K6 (strain AQ3810) GN=A79_2821 PE=4 SV=1	0	66.3619	47.0588	12	19	12	1	374	42.73	4.78	High	High	High		0.485	1.016	120	58.2	121.9	12	12	12	3.489	0	66.3053	12
FALSE	High	Master Protein	A6B8H2	Putative ATP-dependent RNA helicase RhlE OS=Vibrio parahaemolyticus serotype O3:K6 (strain AQ3810) GN=A79_2899 PE=3 SV=1	0	66.3323	29.0168	9	12	9	1	417	46.666	9.16	High	High	High		0.87	0.959	106	92.2	101.7	10	10	10	1.754	0	51.1056	9
FALSE	High	Master Protein	A6B8R5	Serine protease (Fragment) OS=Vibrio parahaemolyticus serotype O3:K6 (strain AQ3810) GN=A79_3401 PE=4 SV=1	0	66.0823	22.7139	11	18	11	1	678	76.107	4.78	High	High	High		1.276	0.99	91.9	117.2	91	11	11	11	1.336	0	57.4283	11
FALSE	High	Master Protein	A6B9S2	Nitrogen regulatory protein (Enzyme IIA-NTR) OS=Vibrio parahaemolyticus serotype O3:K6 (strain AQ3810) GN=A79_2937 PE=4 SV=1	0	66.043	46.6216	5	24	5	1	148	16.548	5.08	High	High	High		0.873	0.966	105.7	92.2	102.1	8	8	8	30.623	0	84.3993	5
FALSE	High	Master Protein	A6B1G3	Psp operon transcriptional activator OS=Vibrio parahaemolyticus serotype O3:K6 (strain AQ3810) GN=pspF PE=4 SV=1	0	65.9878	36.0119	9	13	9	1	336	37.9	5.57	High	High	High		1.161	0.901	98	113.8	88.3	9	9	9	3.084	0	55.4229	9
FALSE	High	Master Protein	A6B9U8	MorA (Fragment) OS=Vibrio parahaemolyticus serotype O3:K6 (strain AQ3810) GN=A79_4622 PE=4 SV=1	0	65.8505	26.0575	10	16	7	1	591	66.072	5.62	High	High	High		1.135	0.964	96.8	109.9	93.3	10	10	10	1.943	3	53.8773	10
FALSE	High	Master Protein	A6B2G2	Methyl-accepting chemotaxis protein OS=Vibrio parahaemolyticus serotype O3:K6 (strain AQ3810) GN=A79_1242 PE=4 SV=1	0	65.7583	21.9904	10	22	9	1	623	67.831	4.67	High	High	High		0.917	0.796	110.6	101.4	88	9	9	9	1.929	0	78.5046	10
FALSE	High	Master Protein	A6B8N2	General secretory pathway protein E (Fragment) OS=Vibrio parahaemolyticus serotype O3:K6 (strain AQ3810) GN=gspE PE=4 SV=1	0	65.745	32.8084	10	22	3	1	381	41.992	7.91	High	High	High		1.037	1.113	95.2	98.7	106	3	3	3	2.981	0	79.535	10
FALSE	High	Master Protein	A6B8P6	3-methyl-2-oxobutanoate hydroxymethyltransferase OS=Vibrio parahaemolyticus serotype O3:K6 (strain AQ3810) GN=panB PE=3 SV=1	0	65.7145	46.9697	7	19	7	1	264	28.76	5.15	High	High	High		1.129	1.096	93	105	102	9	9	9	26.826	0	74.0259	7
FALSE	High	Master Protein	A6B8G1	SH3 domain protein OS=Vibrio parahaemolyticus serotype O3:K6 (strain AQ3810) GN=A79_1763 PE=4 SV=1	0	65.687	44.8276	10	23	10	1	203	22.691	9.38	High	High	High		0.573	0.905	121.1	69.4	109.6	10	10	10	7.66	0	68.9578	10
FALSE	High	Master Protein	A6B852	General secretion pathway protein C OS=Vibrio parahaemolyticus serotype O3:K6 (strain AQ3810) GN=gspC PE=4 SV=1	0	65.5515	44.6254	12	25	12	1	307	33.512	5.59	High	High	High		1.042	0.999	98.6	102.8	98.5	13	13	13	6.848	0	68.0667	12
FALSE	High	Master Protein	A6B420	Protein YbbN OS=Vibrio parahaemolyticus serotype O3:K6 (strain AQ3810) GN=A79_2302 PE=4 SV=1	0	65.4977	50	8	11	8	1	284	31.447	4.54	High	High	High		0.669	1.12	107.6	71.9	120.5	8	8	8	7.111	0	58.9724	8
FALSE	High	Master Protein	A6AZ95	Band 7 protein OS=Vibrio parahaemolyticus serotype O3:K6 (strain AQ3810) GN=A79_4507 PE=4 SV=1	0	65.2765	40.9962	8	18	8	1	261	29.523	5.29	High	High	High		1.567	1.04	83.2	130.3	86.5	8	8	8	4.817	0	67.5736	8
FALSE	High	Master Protein	A6BBB0	Small-conductance mechanosensitive channel (Fragment) OS=Vibrio parahaemolyticus serotype O3:K6 (strain AQ3810) GN=A79_5089 PE=4 SV=1	0	65.2538	38.7931	3	14	3	1	116	13.057	6.57	High	High	High		1.618	1.236	77.8	125.9	96.2	5	5	5	99	0	57.2149	3
FALSE	High	Master Protein	A6B0K7	Acetyl-CoA acetyltransferase OS=Vibrio parahaemolyticus serotype O3:K6 (strain AQ3810) GN=A79_3720 PE=3 SV=1	0	65.1678	34.7395	10	13	9	1	403	41.618	5.35	High	High	High		0.918	1.522	87.2	80	132.7	9	9	9	2.162	0	50.0117	10
FALSE	High	Master Protein	A6B5K2	Hemolysin OS=Vibrio parahaemolyticus serotype O3:K6 (strain AQ3810) GN=A79_4000 PE=4 SV=1	0	65.1093	29.6	10	27	10	1	375	41.657	5	High	High	High		0.955	1.094	98.4	94	107.6	10	10	10	4.275	0	80.516	10
FALSE	High	Master Protein	A6B652	Putative molybdenum transport ATP-binding protein ModF OS=Vibrio parahaemolyticus serotype O3:K6 (strain AQ3810) GN=A79_4379 PE=4 SV=1	0	64.9719	24.7934	11	18	11	1	484	55.45	5.47	High	High	High		0.901	0.841	109.4	98.6	92	11	11	11	2.433	0	54.027	11
FALSE	High	Master Protein	A6BA11	Sigma54 specific transcriptional regulator, Fis family (Fragment) OS=Vibrio parahaemolyticus serotype O3:K6 (strain AQ3810) GN=A79_4357 PE=4 SV=1	0	64.9077	35.8333	11	18	3	1	360	40.379	6.04	High	High	High		0.899	0.94	105.7	95	99.3	10	10	10	3.489	7	62.5893	11
FALSE	High	Master Protein	A6B000	RNA polymerase sigma factor FliA OS=Vibrio parahaemolyticus serotype O3:K6 (strain AQ3810) GN=fliA PE=3 SV=1	0	64.8787	54.5082	10	17	10	1	244	27.183	5.11	High	High	High		0.888	1	103.9	92.2	103.9	10	10	10	4.817	0	49.8275	10
FALSE	High	Master Protein	A6B4Z9	Ribosome maturation factor RimM OS=Vibrio parahaemolyticus serotype O3:K6 (strain AQ3810) GN=rimM PE=3 SV=1	0	64.8478	46.1538	6	19	6	1	182	21.029	5.11	High	High	High		0.896	1.226	96.1	86.1	117.8	8	8	8	14.849	0	61.2408	6
FALSE	High	Master Protein	A6B0L3	Nitrate reductase OS=Vibrio parahaemolyticus serotype O3:K6 (strain AQ3810) GN=napA PE=3 SV=1	0	64.7773	23.1604	12	16	12	1	829	92.901	8.05	High	High	High		0.86	1.296	95.1	81.7	123.2	12	12	12	0.968	0	56.1543	12
FALSE	High	Master Protein	A6B8J7	GTPase Era OS=Vibrio parahaemolyticus serotype O3:K6 (strain AQ3810) GN=era PE=3 SV=1	0	64.6598	42.1875	12	23	12	1	320	36.543	6.92	High	High	High		0.752	1.051	107	80.5	112.5	13	13	13	6.943	0	61.4204	12
FALSE	High	Master Protein	A6B2E3	Membrane-fusion protein OS=Vibrio parahaemolyticus serotype O3:K6 (strain AQ3810) GN=A79_4768 PE=3 SV=1	0	64.6137	33.1565	11	22	11	1	377	40.137	4.88	High	High	High		0.942	1.064	99.8	94	106.2	11	11	11	2.899	0	65.0505	11
FALSE	High	Master Protein	A6B805	Ferritin OS=Vibrio parahaemolyticus serotype O3:K6 (strain AQ3810) GN=A79_3603 PE=3 SV=1	0	64.5734	41.7143	7	27	7	1	175	19.939	4.64	High	High	High		1.041	0.746	107.6	112.1	80.3	8	8	8	14.199	0	97.7862	7
FALSE	High	Master Protein	A6B9F9	Uncharacterized protein OS=Vibrio parahaemolyticus serotype O3:K6 (strain AQ3810) GN=A79_2931 PE=4 SV=1	0	64.5329	32.6087	5	13	5	1	230	25.312	7.42	High	High	High		0.679	1.126	107	72.6	120.4	6	6	6	4.179	0	42.0865	5
FALSE	High	Master Protein	A6B6D3	D-erythrose-4-phosphate dehydrogenase OS=Vibrio parahaemolyticus serotype O3:K6 (strain AQ3810) GN=epd PE=3 SV=1	0	64.4589	32.7536	8	22	8	1	345	38.225	6.38	High	High	High		1.056	0.97	99.1	104.7	96.2	8	8	8	3.281	0	85.293	8
FALSE	High	Master Protein	A6B6B6	Acetolactate synthase, small subunit OS=Vibrio parahaemolyticus serotype O3:K6 (strain AQ3810) GN=ilvN PE=4 SV=1	0	64.4118	62.1951	7	19	7	1	164	18.241	5.6	High	High	High		0.786	0.953	109.5	86.1	104.4	7	7	7	7.254	0	68.3558	7
FALSE	High	Master Protein	A6AXX9	Glycine betaine/L-proline transport ATP-binding protein ProV OS=Vibrio parahaemolyticus serotype O3:K6 (strain AQ3810) GN=A79_0990 PE=4 SV=1	0	64.2937	30.6329	12	24	12	1	395	43.387	4.89	High	High	High		0.578	0.51	143.6	83.1	73.3	12	12	12	4.78	0	76.6579	12
FALSE	High	Master Protein	A6B2D1	Isochorismatase family protein OS=Vibrio parahaemolyticus serotype O3:K6 (strain AQ3810) GN=A79_4756 PE=4 SV=1	0	64.2564	49.4444	8	19	8	1	180	19.705	5.6	High	High	High		1.631	0.795	87.6	142.8	69.6	8	8	8	11.115	0	60.9277	8
FALSE	High	Master Protein	A6AX68	Mannose-6-phosphate isomerase OS=Vibrio parahaemolyticus serotype O3:K6 (strain AQ3810) GN=manA PE=3 SV=1	0	64.2005	27.1605	8	15	8	1	405	44.893	4.82	High	High	High		0.509	0.897	124.7	63.5	111.8	8	8	8	4.623	0	57.5591	8
FALSE	High	Master Protein	A6B8X9	DNA gyrase/topoisomerase IV, A subunit (Fragment) OS=Vibrio parahaemolyticus serotype O3:K6 (strain AQ3810) GN=A79_2277 PE=4 SV=1	0	64.0877	44.3787	9	15	9	1	169	19.979	5.38	High	High	High		1.07	1.033	96.7	103.4	99.9	9	9	9	14.199	0	60.2383	9
FALSE	High	Master Protein	A6B056	Ferredoxin-dependent glutamate synthase OS=Vibrio parahaemolyticus serotype O3:K6 (strain AQ3810) GN=A79_2699 PE=4 SV=1	0	64.0869	29.0865	9	20	9	1	416	47.001	5.96	High	High	High		0.94	0.953	103.7	97.5	98.8	9	9	9	3.16	0	62.9077	9
FALSE	High	Master Protein	A6AZ15	Exodeoxyribonuclease I OS=Vibrio parahaemolyticus serotype O3:K6 (strain AQ3810) GN=A79_6246 PE=4 SV=1	0	63.9651	28.9641	10	16	10	1	473	54.581	5.33	High	High	High		0.873	1.028	103.4	90.3	106.3	10	10	10	1.438	0	52.9403	10
FALSE	High	Master Protein	A6B9D6	3-octaprenyl-4-hydroxybenzoate carboxy-lyase OS=Vibrio parahaemolyticus serotype O3:K6 (strain AQ3810) GN=A79_1458 PE=4 SV=1	0	63.8771	38.7097	11	23	11	1	310	35.408	5.1	High	High	High		1.077	0.985	98	105.5	96.5	11	11	11	3.962	0	65.9168	11
FALSE	High	Master Protein	A6BBH4	50S ribosomal protein L7/L12 OS=Vibrio parahaemolyticus serotype O3:K6 (strain AQ3810) GN=rplL PE=3 SV=1	0	63.8553	66.3934	6	16	6	1	122	12.184	4.41	High	High	High		0.383	0.641	148.3	56.8	95	6	6	6	67.129	0	60.9703	6
FALSE	High	Master Protein	A6B557	Anhydro-N-acetylmuramic acid kinase OS=Vibrio parahaemolyticus serotype O3:K6 (strain AQ3810) GN=anmK PE=3 SV=1	0	63.8021	36.7568	10	16	10	1	370	40.353	6.06	High	High	High		1.062	0.96	99.3	105.4	95.3	11	11	11	3.467	0	55.9298	10
FALSE	High	Master Protein	A6B4I9	Dual-specificity RNA methyltransferase RlmN OS=Vibrio parahaemolyticus serotype O3:K6 (strain AQ3810) GN=rlmN PE=3 SV=1	0	63.7679	35.2	10	16	10	1	375	42.085	7.93	High	High	High		0.686	1.033	110.3	75.7	113.9	10	10	10	2.481	0	46.3011	10
FALSE	High	Master Protein	A6B554	T-protein OS=Vibrio parahaemolyticus serotype O3:K6 (strain AQ3810) GN=tyrA PE=4 SV=1	0	63.7675	34.6667	13	25	13	1	375	42.003	5.96	High	High	High		0.976	0.973	101.7	99.3	99	13	13	13	3.786	0	67.346	13
FALSE	High	Master Protein	A6AZH7	DNA damage-inducible gene in SOS regulon, dependent on cyclic AMP and H-NS OS=Vibrio parahaemolyticus serotype O3:K6 (strain AQ3810) GN=A79_4287 PE=4 SV=1	0	63.7624	48.3607	6	29	6	1	122	13.853	5.1	High	High	High		1.056	1.148	93.6	98.9	107.5	8	8	8	14.849	0	103.215	6
FALSE	High	Master Protein	A6B6E5	Protein-L-isoaspartate O-methyltransferase OS=Vibrio parahaemolyticus serotype O3:K6 (strain AQ3810) GN=pcm PE=3 SV=1	0	63.6262	43.2692	7	17	7	1	208	23.027	6.11	High	High	High		1.27	0.88	95.3	120.9	83.8	7	7	7	4.878	0	66.3338	7
FALSE	High	Master Protein	A6AX31	Methyl-accepting chemotaxis protein OS=Vibrio parahaemolyticus serotype O3:K6 (strain AQ3810) GN=A79_0471 PE=4 SV=1	0	63.5042	21.5722	9	19	8	1	547	59.459	4.77	High	High	High		1.031	0.998	99	102.1	98.8	8	8	8	1.683	0	69.6841	9
FALSE	High	Master Protein	A6AZ79	Methylmalonate-semialdehyde dehydrogenase OS=Vibrio parahaemolyticus serotype O3:K6 (strain AQ3810) GN=mmsA PE=3 SV=1	0	63.3247	29.5775	13	20	11	1	497	53.971	5.02	High	High	High		0.979	0.731	110.7	108.4	80.9	11	11	11	3.642	0	62.2876	13
FALSE	High	Master Protein	A6B4P3	DNA-binding response regulator (Fragment) OS=Vibrio parahaemolyticus serotype O3:K6 (strain AQ3810) GN=A79_1914 PE=4 SV=1	0	63.1534	46.0317	5	14	5	1	126	13.916	4.56	High	High	High		1.235	1.055	91.2	112.6	96.2	6	6	6	12.335	0	66.3278	5
FALSE	High	Master Protein	A6B485	Transporter OS=Vibrio parahaemolyticus serotype O3:K6 (strain AQ3810) GN=A79_4989 PE=4 SV=1	0	63.0143	20.274	6	19	6	1	365	40.077	7.68	High	High	High		0.608	1.009	114.6	69.7	115.7	7	7	7	2.34	0	73.023	6
FALSE	High	Master Protein	A6B2U0	SAM-dependent methyltransferase OS=Vibrio parahaemolyticus serotype O3:K6 (strain AQ3810) GN=A79_2328 PE=4 SV=1	0	62.9868	34.3662	9	15	9	1	355	39.571	5.1	High	High	High		1	1.015	99.5	99.5	101	9	9	9	3.833	0	53.7138	9
FALSE	High	Master Protein	A6B894	OpaR OS=Vibrio parahaemolyticus serotype O3:K6 (strain AQ3810) GN=A79_0351 PE=4 SV=1	0	62.9627	45.9016	6	18	6	1	183	21.116	5.12	High	High	High		0.767	0.632	125.1	95.9	79	6	6	6	5.579	0	74.6843	6
FALSE	High	Master Protein	A6BBY4	Msha biogenesis protein mshe OS=Vibrio parahaemolyticus serotype O3:K6 (strain AQ3810) GN=A79_4037 PE=4 SV=1	0	62.8234	38.1579	6	18	1	1	228	25.757	6.81	High	High	High		0.971	1.021	100.3	97.4	102.4	1	1	1	4.878	0	76.9621	6
FALSE	High	Master Protein	A6AYT4	Uncharacterized protein OS=Vibrio parahaemolyticus serotype O3:K6 (strain AQ3810) GN=A79_6163 PE=4 SV=1	0	62.7638	30.3202	13	18	12	1	531	58.99	5.17	High	High	High		0.706	0.741	122.6	86.5	90.9	13	13	13	2.29	1	53.1715	13
FALSE	High	Master Protein	A6B3V2	Nucleoside permease OS=Vibrio parahaemolyticus serotype O3:K6 (strain AQ3810) GN=A79_2961 PE=3 SV=1	0	62.6217	15.9251	3	15	3	1	427	44.214	5.11	High	High	High		1.425	0.871	91	129.7	79.3	4	4	4	5.579	0	75.8623	3
FALSE	High	Master Protein	A6B2B9	Putrescine-binding periplasmic protein OS=Vibrio parahaemolyticus serotype O3:K6 (strain AQ3810) GN=A79_5131 PE=3 SV=1	0	62.6094	28.9855	11	20	11	1	345	38.992	4.77	High	High	High		0.527	1.061	115.9	61.1	123	12	12	12	6.743	0	56.4795	11
FALSE	High	Master Protein	A6AY92	Phosphofructokinase OS=Vibrio parahaemolyticus serotype O3:K6 (strain AQ3810) GN=pfkB PE=3 SV=1	0	62.4944	40.7407	8	16	8	1	324	34.888	4.94	High	High	High		0.768	1.131	103.5	79.5	117	8	8	8	5.494	0	56.2714	8
FALSE	High	Master Protein	A6AY84	Amino acid ABC transporter, periplasmic amino acid-binding protein OS=Vibrio parahaemolyticus serotype O3:K6 (strain AQ3810) GN=A79_1480 PE=4 SV=1	0	62.4555	40.4412	8	19	8	1	272	30.483	7.55	High	High	High		0.39	0.727	141.7	55.3	103	9	9	9	6.499	0	56.3941	8
FALSE	High	Master Protein	A6B4L3	Nitroreductase OS=Vibrio parahaemolyticus serotype O3:K6 (strain AQ3810) GN=A79_5070 PE=4 SV=1	0	62.437	46.7033	9	35	9	1	182	19.908	6.68	High	High	High		0.907	0.89	107.3	97.3	95.4	9	9	9	22.101	0	107.336	9
FALSE	High	Master Protein	A6AYY8	Transcriptional regulator OS=Vibrio parahaemolyticus serotype O3:K6 (strain AQ3810) GN=A79_6219 PE=4 SV=1	0	62.2135	27.6786	7	31	7	1	224	25.934	5.54	High	High	High		1.056	1.005	98	103.5	98.5	8	8	8	5.661	0	100.926	7
FALSE	High	Master Protein	A6B7R3	Tryptophan synthase alpha chain OS=Vibrio parahaemolyticus serotype O3:K6 (strain AQ3810) GN=trpA PE=3 SV=1	0	62.2061	44.403	7	16	7	1	268	28.63	4.84	High	High	High		1.107	0.915	99.3	109.9	90.8	7	7	7	4.179	0	77.3195	7
FALSE	High	Master Protein	A6B0E5	Amidase OS=Vibrio parahaemolyticus serotype O3:K6 (strain AQ3810) GN=A79_2885 PE=4 SV=1	0	62.1777	53.9171	7	16	7	1	217	23.649	5.11	High	High	High		0.791	0.995	107.7	85.2	107.1	7	7	7	6.017	0	62.6549	7
FALSE	High	Master Protein	A6B3K3	Pyridoxine/pyridoxamine 5'-phosphate oxidase OS=Vibrio parahaemolyticus serotype O3:K6 (strain AQ3810) GN=pdxH PE=3 SV=1	0	62.0836	46.9194	8	15	8	1	211	24.232	9.09	High	High	High		0.82	0.916	109.6	89.9	100.5	8	8	8	7.377	0	58.9842	8
FALSE	High	Master Protein	A6B4D7	Ribosomal RNA small subunit methyltransferase G OS=Vibrio parahaemolyticus serotype O3:K6 (strain AQ3810) GN=gidB PE=3 SV=1	0	62.0813	50.237	8	13	8	1	211	23.916	5.78	High	High	High		0.971	1.097	97.8	95	107.2	8	8	8	4.412	0	55.6869	8
FALSE	High	Master Protein	A6B2P3	Sulfate adenylyltransferase subunit 2 OS=Vibrio parahaemolyticus serotype O3:K6 (strain AQ3810) GN=cysD PE=3 SV=1	0	62.0158	37.4172	10	21	10	1	302	34.961	6.47	High	High	High		0.582	1.094	112.1	65.2	122.6	10	10	10	4.456	0	58.9854	10
FALSE	High	Master Protein	A6B7A2	Thiazole synthase OS=Vibrio parahaemolyticus serotype O3:K6 (strain AQ3810) GN=thiG PE=3 SV=1	0	61.9772	38.5214	7	14	7	1	257	27.029	6.34	High	High	High		0.724	1.044	108.4	78.5	113.2	7	7	7	6.197	0	58.3916	7
FALSE	High	Master Protein	A6AYJ4	Histone acetyltransferase HPA2 OS=Vibrio parahaemolyticus serotype O3:K6 (strain AQ3810) GN=A79_1591 PE=4 SV=1	0	61.9228	35.7143	5	20	5	1	182	20.99	5.38	High	High	High		0.791	1.004	107.3	84.9	107.8	6	6	6	20.544	0	78.2479	5
FALSE	High	Master Protein	A6B2N0	ADP compounds hydrolase NudE OS=Vibrio parahaemolyticus serotype O3:K6 (strain AQ3810) GN=A79_0071 PE=4 SV=1	0	61.5881	62.4339	9	21	9	1	189	21.267	5.43	High	High	High		0.946	0.993	102.1	96.6	101.4	9	9	9	5.494	0	76.967	9
FALSE	High	Master Protein	A6B351	Acetoin utilization AcuB protein OS=Vibrio parahaemolyticus serotype O3:K6 (strain AQ3810) GN=A79_0778 PE=4 SV=1	0	61.465	63.8158	7	27	7	1	152	17.215	5.01	High	High	High		0.475	0.919	125.3	59.5	115.2	8	8	8	55.234	0	76.4527	7
FALSE	High	Master Protein	A6B9X1	Transcriptional regulator, LuxR family OS=Vibrio parahaemolyticus serotype O3:K6 (strain AQ3810) GN=A79_0130 PE=4 SV=1	0	61.2629	53.11	8	16	8	1	209	22.692	4.92	High	High	High		1.23	1.052	91.4	112.4	96.2	9	9	9	13.678	0	63.5772	8
FALSE	High	Master Protein	A6B9Q4	Acetate kinase 2 (Fragment) OS=Vibrio parahaemolyticus serotype O3:K6 (strain AQ3810) GN=A79_1665 PE=4 SV=1	0	60.9898	59.5588	5	16	5	1	136	14.345	5.49	High	High	High		0.822	0.987	106.8	87.8	105.4	5	5	5	18.307	0	71.1882	5
FALSE	High	Master Protein	A6B8Z3	tRNA dimethylallyltransferase (Fragment) OS=Vibrio parahaemolyticus serotype O3:K6 (strain AQ3810) GN=miaA PE=3 SV=1	0	60.9888	56.7308	11	18	11	1	208	23.124	6.24	High	High	High		0.976	0.847	106.3	103.7	90	11	11	11	4.08	0	64.3212	11
FALSE	High	Master Protein	A6B7P3	Catalase-peroxidase (Fragment) OS=Vibrio parahaemolyticus serotype O3:K6 (strain AQ3810) GN=katG PE=3 SV=1	0	60.9545	16.1937	8	37	3	1	599	66.718	5.33	High	High	High		1.226	1.121	89.6	109.9	100.5	3	3	3	1.848	0	101.984	8
FALSE	High	Master Protein	A6B872	Uridine kinase OS=Vibrio parahaemolyticus serotype O3:K6 (strain AQ3810) GN=udk PE=3 SV=1	0	60.954	47.8873	8	20	8	1	213	24.139	6.95	High	High	High		1.13	1.116	92.4	104.4	103.2	11	11	11	13.678	0	59.7881	8
FALSE	High	Master Protein	A6B3F5	ABC transporter substrate-binding protein OS=Vibrio parahaemolyticus serotype O3:K6 (strain AQ3810) GN=A79_1177 PE=4 SV=1	0	60.826	42.6791	8	13	8	1	321	33.175	6.37	High	High	High		0.646	0.991	113.8	73.5	112.8	9	9	9	3.437	0	56.0277	8
FALSE	High	Master Protein	A6B6R0	UPF0234 protein A79_3354 OS=Vibrio parahaemolyticus serotype O3:K6 (strain AQ3810) GN=A79_3354 PE=3 SV=1	0	60.7594	36.25	6	19	6	1	160	18.142	8.4	High	High	High		0.46	0.945	124.7	57.3	117.9	7	7	7	9	0	75.3031	6
FALSE	High	Master Protein	A6B2I4	Membrane-fusion protein OS=Vibrio parahaemolyticus serotype O3:K6 (strain AQ3810) GN=A79_1264 PE=4 SV=1	0	60.7162	45.3968	13	20	13	1	315	34.165	5.5	High	High	High		1.016	0.904	102.7	104.4	92.9	14	14	14	3.642	0	59.9229	13
FALSE	High	Master Protein	A6B7T0	Pseudouridine synthase OS=Vibrio parahaemolyticus serotype O3:K6 (strain AQ3810) GN=rluC PE=3 SV=1	0	60.715	35.873	11	23	11	1	315	36.119	9.8	High	High	High		0.984	0.957	102	100.4	97.6	12	12	12	4.78	0	60.5243	11
FALSE	High	Master Protein	A6B4Z5	Cell division protein ZapD OS=Vibrio parahaemolyticus serotype O3:K6 (strain AQ3810) GN=zapD PE=3 SV=1	0	60.5129	34.2742	10	29	10	1	248	28.821	7.62	High	High	High		1.273	0.998	91.7	116.7	91.6	10	10	10	10.548	0	71.3677	10
FALSE	High	Master Protein	A6B7X2	Putative outer membrane protein, Ail and OmpX OS=Vibrio parahaemolyticus serotype O3:K6 (strain AQ3810) GN=A79_2009 PE=4 SV=1	0	60.5115	28.9593	4	19	4	1	221	24.776	4.73	High	High	High		1.641	0.932	84	137.8	78.3	7	7	7	15.681	0	61.8624	4
FALSE	High	Master Protein	A6B4Z7	50S ribosomal protein L19 OS=Vibrio parahaemolyticus serotype O3:K6 (strain AQ3810) GN=rplS PE=3 SV=1	0	60.4468	56.4103	7	36	7	1	117	13.211	10.39	High	High	High		0.422	1.109	118.5	50	131.5	8	8	8	99	0	124.783	7
FALSE	High	Master Protein	A6B9B5	50S ribosomal protein L17 OS=Vibrio parahaemolyticus serotype O3:K6 (strain AQ3810) GN=rplQ PE=3 SV=1	0	60.4124	45.2381	6	26	6	1	126	14.194	11.08	High	High	High		0.19	0.926	141.8	27	131.3	8	8	8	70.969	0	90.7935	6
FALSE	High	Master Protein	A6B344	Protein-export membrane protein SecF OS=Vibrio parahaemolyticus serotype O3:K6 (strain AQ3810) GN=secF PE=3 SV=1	0	60.2277	21.5873	5	21	5	1	315	34.333	5.17	High	High	High		1.08	1.168	92.4	99.7	107.9	5	5	5	4.623	0	78.8138	5
FALSE	High	Master Protein	A6B9B2	Nucleotide-binding protein A79_1285 OS=Vibrio parahaemolyticus serotype O3:K6 (strain AQ3810) GN=A79_1285 PE=3 SV=1	0	60.0886	26.4808	7	14	7	1	287	32.272	7.06	High	High	High		1.168	1.067	92.8	108.3	99	9	9	9	4.623	0	50.036	7
FALSE	High	Master Protein	A6B1H4	Cardiolipin synthase A OS=Vibrio parahaemolyticus serotype O3:K6 (strain AQ3810) GN=clsA PE=3 SV=1	0	59.8978	25.2066	9	17	9	1	484	55.715	7.55	High	High	High		1.375	1.002	88.8	122.1	89	10	10	10	3.217	0	46.1676	9
FALSE	High	Master Protein	A6B280	Ggdef domain containing protein OS=Vibrio parahaemolyticus serotype O3:K6 (strain AQ3810) GN=A79_5092 PE=4 SV=1	0	59.8734	29.0625	9	16	9	1	320	36.923	5.44	High	High	High		1.02	0.988	99.8	101.7	98.5	10	10	10	4.275	0	55.2476	9
FALSE	High	Master Protein	A6B9A6	Ribosomal subunit interface protein OS=Vibrio parahaemolyticus serotype O3:K6 (strain AQ3810) GN=yfiA PE=4 SV=1	0	59.8296	54.6296	5	22	5	1	108	12.378	7.43	High	High	High		0.382	0.934	129.6	49.4	121	6	6	6	16.783	0	81.3205	5
FALSE	High	Master Protein	A6B944	Iron-containing alcohol dehydrogenase OS=Vibrio parahaemolyticus serotype O3:K6 (strain AQ3810) GN=A79_5386 PE=4 SV=1	0	59.7808	31.7073	10	15	10	1	451	48.657	8.1	High	High	High		0.764	0.922	111.7	85.4	102.9	10	10	10	2.162	0	47.8583	10
FALSE	High	Master Protein	A6B123	3-deoxy-manno-octulosonate cytidylyltransferase OS=Vibrio parahaemolyticus serotype O3:K6 (strain AQ3810) GN=kdsB PE=3 SV=1	0	59.7386	39.8406	7	12	7	1	251	27.418	4.87	High	High	High		0.959	1.084	98.6	94.5	106.9	8	8	8	3.87	0	49.425	7
FALSE	High	Master Protein	A6B8W7	Protein YgfY OS=Vibrio parahaemolyticus serotype O3:K6 (strain AQ3810) GN=A79_1809 PE=4 SV=1	0	59.6819	56.9767	4	27	4	1	86	10.024	5.02	High	High	High		0.704	0.959	112.6	79.3	108.1	7	7	7	629.957	0	86.6257	4
FALSE	High	Master Protein	A6BA68	Outer membrane lipoprotein OS=Vibrio parahaemolyticus serotype O3:K6 (strain AQ3810) GN=A79_0464 PE=4 SV=1	0	59.6573	57.1429	3	24	3	1	84	8.665	4.5	High	High	High		1.853	0.843	81.2	150.4	68.4	4	4	4	99	0	103.998	3
FALSE	High	Master Protein	A6B6J8	DNA primase OS=Vibrio parahaemolyticus serotype O3:K6 (strain AQ3810) GN=dnaG PE=3 SV=1	0	59.5982	28.6689	14	19	14	1	586	66.219	6.33	High	High	High		1.085	1.033	96.2	104.4	99.4	15	15	15	1.572	0	56.2366	14
FALSE	High	Master Protein	A6B134	Uncharacterized protein OS=Vibrio parahaemolyticus serotype O3:K6 (strain AQ3810) GN=A79_6098 PE=4 SV=1	0	59.5901	34.2975	6	18	6	1	242	27.329	5.54	High	High	High		1.101	0.907	99.7	109.8	90.5	7	7	7	7.111	0	69.6482	6
FALSE	High	Master Protein	A6B297	Sigma-54 dependent response regulator OS=Vibrio parahaemolyticus serotype O3:K6 (strain AQ3810) GN=A79_5109 PE=4 SV=1	0	59.5015	24.4306	12	18	11	1	483	54.508	5.99	High	High	High		0.96	0.92	104.2	100	95.9	12	12	12	2.433	1	55.789	12
FALSE	High	Master Protein	A6BA22	UvrABC system protein C (Fragment) OS=Vibrio parahaemolyticus serotype O3:K6 (strain AQ3810) GN=A79_3981 PE=4 SV=1	0	59.2663	31.0345	13	20	13	1	464	52.389	8.46	High	High	High		0.807	0.889	111.3	89.8	99	13	13	13	3.047	0	49.4	13
FALSE	High	Master Protein	A6AYB6	Phospholipase A1 OS=Vibrio parahaemolyticus serotype O3:K6 (strain AQ3810) GN=A79_1512 PE=4 SV=1	0	59.2476	30.9942	10	19	10	1	342	39.157	4.97	High	High	High		1.148	0.878	99.2	113.8	87	11	11	11	3.329	0	61.2805	10
FALSE	High	Master Protein	A6B9D2	Uncharacterized protein OS=Vibrio parahaemolyticus serotype O3:K6 (strain AQ3810) GN=A79_0030 PE=4 SV=1	0	59.108	48.2517	5	15	5	1	143	16.026	5.08	High	High	High		0.465	0.617	144.1	67	88.9	5	5	5	22.714	0	59.6516	5
FALSE	High	Master Protein	A6B2V8	Beta-ketoacyl synthase OS=Vibrio parahaemolyticus serotype O3:K6 (strain AQ3810) GN=A79_2346 PE=3 SV=1	0	59.0737	19.4103	5	13	5	1	407	43.644	5.43	High	High	High		0.97	1.127	96.9	94	109.1	6	6	6	4.179	0	52.0318	5
FALSE	High	Master Protein	A6BAD3	Glycine cleavage system regulatory protein OS=Vibrio parahaemolyticus serotype O3:K6 (strain AQ3810) GN=A79_3421 PE=4 SV=1	0	58.9176	52.2222	5	16	5	1	180	19.96	5.03	High	High	High		1.322	1.016	89.9	118.8	91.3	5	5	5	9	0	74.1385	5
FALSE	High	Master Protein	A6B564	4-hydroxy-3-methylbut-2-enyl diphosphate reductase OS=Vibrio parahaemolyticus serotype O3:K6 (strain AQ3810) GN=ispH PE=3 SV=1	0	58.9133	25.2336	7	17	7	1	321	35.699	5.14	High	High	High		0.776	1.11	103.9	80.6	115.4	8	8	8	3.642	0	52.6177	7
FALSE	High	Master Protein	A6BAW6	O-sialoglycoprotein endopeptidase (Fragment) OS=Vibrio parahaemolyticus serotype O3:K6 (strain AQ3810) GN=A79_2764 PE=4 SV=1	0	58.7603	42.0091	8	22	8	1	219	23.65	6.25	High	High	High		1.092	1.03	96.1	104.9	99	8	8	8	9	0	66.1861	8
FALSE	High	Master Protein	A6AYZ0	Peptidase S41 OS=Vibrio parahaemolyticus serotype O3:K6 (strain AQ3810) GN=A79_6221 PE=4 SV=1	0	58.7536	19.5446	8	21	8	1	527	57.663	5.19	High	High	High		1.102	0.985	97.2	107.1	95.7	8	8	8	2.455	0	71.1501	8
FALSE	High	Master Protein	A6B4N9	GTP cyclohydrolase 1 type 2 homolog OS=Vibrio parahaemolyticus serotype O3:K6 (strain AQ3810) GN=A79_4169 PE=3 SV=1	0	58.6783	41.6667	7	18	7	1	252	27.991	5.91	High	High	High		0.84	0.819	112.8	94.7	92.4	7	7	7	3.642	0	72.3214	7
FALSE	High	Master Protein	A6B3S3	Histidine biosynthesis bifunctional protein HisB OS=Vibrio parahaemolyticus serotype O3:K6 (strain AQ3810) GN=hisB PE=3 SV=1	0	58.5721	38.6555	11	19	11	1	357	39.802	5.15	High	High	High		1.075	0.908	100.6	108.1	91.3	11	11	11	5.661	0	58.0505	11
FALSE	High	Master Protein	A6B9L6	Sodium/alanine symporter OS=Vibrio parahaemolyticus serotype O3:K6 (strain AQ3810) GN=A79_2155 PE=3 SV=1	0	58.3961	16.5618	8	35	8	1	477	51.057	6.7	High	High	High		1.079	1.08	95	102.5	102.6	9	9	9	12.594	0	80.5889	8
FALSE	High	Master Protein	A6AZV3	Response regulator OS=Vibrio parahaemolyticus serotype O3:K6 (strain AQ3810) GN=A79_3177 PE=4 SV=1	0	58.2359	55.418	13	19	13	1	323	36.68	5.44	High	High	High		0.952	0.882	105.9	100.7	93.4	13	13	13	4.623	0	57.9806	13
FALSE	High	Master Protein	A6B312	Peptidoglycan-associated lipoprotein OS=Vibrio parahaemolyticus serotype O3:K6 (strain AQ3810) GN=A79_2434 PE=3 SV=1	0	58.2047	30.4598	3	34	3	1	174	18.701	4.73	High	High	High		1.229	1.013	92.5	113.7	93.8	5	5	5	315.228	0	116.16	3
FALSE	High	Master Protein	A6AZ92	Glycine betaine transport ATP-binding protein opuAA OS=Vibrio parahaemolyticus serotype O3:K6 (strain AQ3810) GN=A79_4504 PE=4 SV=1	0	58.1881	29.9492	7	13	7	1	394	43.693	4.91	High	High	High		0.389	0.432	164.7	64.1	71.2	7	7	7	1.994	0	56.1246	7
FALSE	High	Master Protein	A6B3K1	Response regulator OS=Vibrio parahaemolyticus serotype O3:K6 (strain AQ3810) GN=A79_2498 PE=4 SV=1	0	58.1304	38.7255	15	18	15	1	408	46.624	6.64	High	High	High		0.97	0.899	104.6	101.4	94	15	15	15	3.262	0	47.9214	15
FALSE	High	Master Protein	A6B5X9	Ribosomal RNA small subunit methyltransferase H OS=Vibrio parahaemolyticus serotype O3:K6 (strain AQ3810) GN=mraW PE=3 SV=1	0	57.8609	43.038	10	23	10	1	316	35.192	6.28	High	High	High		0.939	0.998	102.2	95.9	102	10	10	10	2.511	0	68.5365	10
FALSE	High	Master Protein	A6B409	Transmembrane regulatory protein ToxS OS=Vibrio parahaemolyticus serotype O3:K6 (strain AQ3810) GN=A79_2291 PE=4 SV=1	0	57.7317	42.1053	7	20	7	1	171	19.189	5.63	High	High	High		1.266	1.152	87.8	111.1	101.1	7	7	7	13.678	0	67.3657	7
FALSE	High	Master Protein	A6B3T5	tRNA pseudouridine synthase B OS=Vibrio parahaemolyticus serotype O3:K6 (strain AQ3810) GN=truB PE=3 SV=1	0	57.6742	35.9873	8	18	8	1	314	35.244	5.35	High	High	High		0.788	1.083	104.5	82.4	113.1	8	8	8	4.623	0	67.5396	8
FALSE	High	Master Protein	A6B776	Zinc metalloprotease OS=Vibrio parahaemolyticus serotype O3:K6 (strain AQ3810) GN=rseP PE=3 SV=1	0	57.5755	24.7788	9	17	9	1	452	49.122	5.19	High	High	High		1.141	1.003	95.4	108.9	95.7	10	10	10	4.012	0	49.1519	9
FALSE	High	Master Protein	A6B9S3	UPF0325 protein A79_0318 OS=Vibrio parahaemolyticus serotype O3:K6 (strain AQ3810) GN=A79_0318 PE=3 SV=1	0	57.5427	66.1417	10	50	10	1	127	14.801	9.5	High	High	High		1.115	0.88	100.2	111.7	88.1	11	11	11	165.81	0	119.345	10
FALSE	High	Master Protein	A6AZ18	Cytidine deaminase OS=Vibrio parahaemolyticus serotype O3:K6 (strain AQ3810) GN=cdd PE=3 SV=1	0	57.4889	45.7627	7	19	7	1	295	31.892	4.93	High	High	High		0.738	0.832	116.7	86.2	97.1	7	7	7	4.179	0	59.5149	7
FALSE	High	Master Protein	A6B7S4	CheR methyltransferase, SAM binding domain OS=Vibrio parahaemolyticus serotype O3:K6 (strain AQ3810) GN=cheR PE=4 SV=1	0	57.4261	38.1818	10	24	10	1	275	30.803	9.23	High	High	High		1.069	0.95	99.4	106.2	94.4	11	11	11	4.995	0	74.535	10
FALSE	High	Master Protein	A6AXY0	Cyclic nucleotide binding protein/2 CBS domains OS=Vibrio parahaemolyticus serotype O3:K6 (strain AQ3810) GN=A79_0991 PE=4 SV=1	0	57.333	21.246	14	26	12	1	626	71.227	5.19	High	High	High		1	0.875	104.3	104.4	91.3	15	15	15	2.371	2	58.1758	14
FALSE	High	Master Protein	A6B4V4	Uncharacterized protein OS=Vibrio parahaemolyticus serotype O3:K6 (strain AQ3810) GN=A79_1383 PE=4 SV=1	0	57.2099	54.6218	5	11	5	1	119	13.89	6.57	High	High	High		0.544	0.954	120.1	65.3	114.6	5	5	5	12.895	0	48.6364	5
FALSE	High	Master Protein	A6B9S1	Ribosomal subunit interface protein OS=Vibrio parahaemolyticus serotype O3:K6 (strain AQ3810) GN=yfiA PE=4 SV=1	0	57.2077	37.8947	2	22	2	1	95	11.023	6.52	High	High	High		0.658	0.913	116.7	76.8	106.6	4	4	4	463.159	0	98.1166	2
FALSE	High	Master Protein	A6B405	Ferrochelatase OS=Vibrio parahaemolyticus serotype O3:K6 (strain AQ3810) GN=hemH PE=3 SV=1	0	57.1696	35.3125	8	18	8	1	320	36.228	5.74	High	High	High		1.07	1.062	95.8	102.5	101.7	9	9	9	5.31	0	71.3097	8
FALSE	High	Master Protein	A6AZU4	ATP-dependent Zn protease OS=Vibrio parahaemolyticus serotype O3:K6 (strain AQ3810) GN=A79_3168 PE=4 SV=1	0	57.1529	39.6476	9	22	9	1	227	25.657	8.4	High	High	High		1.293	0.963	92.2	119.1	88.7	10	10	10	13.251	0	60.9688	9
FALSE	High	Master Protein	A6B308	Protein TolQ (Fragment) OS=Vibrio parahaemolyticus serotype O3:K6 (strain AQ3810) GN=tolQ PE=3 SV=1	0	57.0506	40.3226	6	13	6	1	186	20.381	6.2	High	High	High		1.222	1.042	91.9	112.3	95.8	7	7	7	22.714	0	52.7519	6
FALSE	High	Master Protein	A6B146	SAM-dependent methyltransferase OS=Vibrio parahaemolyticus serotype O3:K6 (strain AQ3810) GN=A79_1829 PE=4 SV=1	0	56.9615	21.9895	4	19	4	1	191	20.765	4.41	High	High	High		1.423	0.859	91.4	130	78.6	5	5	5	12.335	0	75.4927	4
FALSE	High	Master Protein	A6B8K1	Ribosomal RNA large subunit methyltransferase J OS=Vibrio parahaemolyticus serotype O3:K6 (strain AQ3810) GN=rlmJ PE=3 SV=1	0	56.8214	35.1254	8	15	8	1	279	32.247	7.02	High	High	High		1.04	1.032	97.7	101.5	100.8	9	9	9	2.34	0	58.6501	8
FALSE	High	Master Protein	A6B306	Transcriptional regulator OS=Vibrio parahaemolyticus serotype O3:K6 (strain AQ3810) GN=A79_5048 PE=4 SV=1	0	56.6902	34.6939	5	21	5	1	196	22.403	5.88	High	High	High		1.228	0.902	95.9	117.7	86.4	5	5	5	6.943	0	69.1299	5
FALSE	High	Master Protein	A6B1U9	Uncharacterized protein OS=Vibrio parahaemolyticus serotype O3:K6 (strain AQ3810) GN=A79_5924 PE=4 SV=1	0	56.5764	52.809	8	18	8	1	178	20.747	5.76	High	High	High		0.899	0.735	113.9	102.3	83.8	8	8	8	7.377	0	57.6023	8
FALSE	High	Master Protein	A6B0Y0	Ornithine decarboxylase, inducible OS=Vibrio parahaemolyticus serotype O3:K6 (strain AQ3810) GN=A79_5443 PE=4 SV=1	0	56.5503	17.9021	9	12	9	1	715	81.013	5.72	High	High	High		0.996	1.325	90.4	90	119.7	10	10	10	1.154	0	36.7216	9
FALSE	High	Master Protein	A6BBV7	Methyl-accepting chemotaxis protein (Fragment) OS=Vibrio parahaemolyticus serotype O3:K6 (strain AQ3810) GN=A79_0219 PE=4 SV=1	0	56.4137	28.2609	5	16	4	1	276	29.64	4.48	High	High	High		1.005	0.91	102.9	103.4	93.6	4	4	4	3.642	0	65.2114	5
FALSE	High	Master Protein	A6B2K8	TolR OS=Vibrio parahaemolyticus serotype O3:K6 (strain AQ3810) GN=A79_0049 PE=3 SV=1	0	56.4122	32.0088	13	19	13	1	453	49.324	5.47	High	High	High		1.14	0.972	96.4	109.9	93.7	13	13	13	2.594	0	51.0463	13
FALSE	High	Master Protein	A6B7S8	Uncharacterized protein OS=Vibrio parahaemolyticus serotype O3:K6 (strain AQ3810) GN=A79_0148 PE=4 SV=1	0	56.3818	32.1839	7	23	7	1	174	19.891	4.48	High	High	High		0.871	0.991	104.8	91.3	103.9	7	7	7	41.17	0	72.7303	7
FALSE	High	Master Protein	A6AZ80	Acyl-CoA dehydrogenase OS=Vibrio parahaemolyticus serotype O3:K6 (strain AQ3810) GN=A79_4492 PE=3 SV=1	0	56.3348	35.1562	11	16	9	1	384	41.951	5.3	High	High	High		0.907	0.662	116.7	105.9	77.3	11	11	11	2.831	2	39.8928	11
FALSE	High	Master Protein	A6B2A8	Formate dehydrogenase iron-sulfur subunit OS=Vibrio parahaemolyticus serotype O3:K6 (strain AQ3810) GN=A79_5120 PE=4 SV=1	0	56.2156	35.1485	6	13	6	1	202	21.957	5.33	High	High	High		0.476	1.181	112.9	53.8	133.3	6	6	6	7.111	0	48.1586	6
FALSE	High	Master Protein	A6B3H6	UvrABC system protein B OS=Vibrio parahaemolyticus serotype O3:K6 (strain AQ3810) GN=uvrB PE=3 SV=1	0	56.1043	19.3787	14	29	14	1	676	76.981	5.22	High	High	High		1.161	1.027	94.1	109.2	96.7	14	14	14	1.728	0	68.2009	14
FALSE	High	Master Protein	A6B9E4	Protein VisC OS=Vibrio parahaemolyticus serotype O3:K6 (strain AQ3810) GN=A79_0138 PE=4 SV=1	0	56.0887	38.8889	9	18	4	1	270	29.682	5.05	High	High	High		0.975	1.01	100.5	98	101.5	4	4	4	3.437	0	68.197	9
FALSE	High	Master Protein	A6B1M8	Ggdef family protein OS=Vibrio parahaemolyticus serotype O3:K6 (strain AQ3810) GN=A79_6009 PE=4 SV=1	0	55.8991	20.7715	6	11	6	1	337	38.236	6.55	High	High	High		0.883	0.825	110.8	97.8	91.4	6	6	6	1.994	0	38.1553	6
FALSE	High	Master Protein	A6B8T0	Uncharacterized protein OS=Vibrio parahaemolyticus serotype O3:K6 (strain AQ3810) GN=A79_1802 PE=4 SV=1	0	55.8776	45.9716	7	13	7	1	211	23.645	5.48	High	High	High		0.899	0.889	107.6	96.8	95.7	7	7	7	7.377	0	50.2222	7
FALSE	High	Master Protein	A6B3B9	Transcriptional regulator (Fragment) OS=Vibrio parahaemolyticus serotype O3:K6 (strain AQ3810) GN=A79_0268 PE=4 SV=1	0	55.7175	57.6087	6	31	6	1	92	10.682	7.52	High	High	High		0.751	1.003	108.9	81.8	109.3	7	7	7	145.78	0	91.286	6
FALSE	High	Master Protein	A6B1L0	Signal transduction histidine kinase OS=Vibrio parahaemolyticus serotype O3:K6 (strain AQ3810) GN=A79_5990 PE=4 SV=1	0	55.6574	17.971	12	16	12	1	690	77.801	7.42	High	High	High		1.028	0.956	100.5	103.4	96.1	12	12	12	1.543	0	48.7961	12
FALSE	High	Master Protein	A6B1B6	Tyrosine--tRNA ligase OS=Vibrio parahaemolyticus serotype O3:K6 (strain AQ3810) GN=tyrS PE=3 SV=1	0	55.6133	34.3675	7	11	7	1	419	46.656	5.47	High	High	High		0.79	1.11	103.4	81.7	114.8	7	7	7	2.36	0	47.3509	7
FALSE	High	Master Protein	A6B6B4	AMP-binding family protein OS=Vibrio parahaemolyticus serotype O3:K6 (strain AQ3810) GN=fadD PE=4 SV=1	0	55.5506	19.103	8	13	8	1	602	67.923	6.37	High	High	High		0.729	0.996	110.1	80.2	109.6	9	9	9	0.896	0	43.6043	8
FALSE	High	Master Protein	A6B9K2	Thymidylate synthase (Fragment) OS=Vibrio parahaemolyticus serotype O3:K6 (strain AQ3810) GN=thyA PE=4 SV=1	0	55.5444	32.549	8	22	2	1	255	29.433	5.91	High	High	High		0.845	1.046	103.8	87.7	108.6	8	8	8	9	6	54.8425	8
FALSE	High	Master Protein	A6B0J9	SH3 domain protein OS=Vibrio parahaemolyticus serotype O3:K6 (strain AQ3810) GN=A79_3712 PE=4 SV=1	0	55.4958	53.3632	10	20	10	1	223	25.63	4.83	High	High	High		0.815	0.796	114.9	93.6	91.5	10	10	10	7.66	0	54.9079	10
FALSE	High	Master Protein	A6BAD9	Seryl-tRNA synthetase N-domain (Fragment) OS=Vibrio parahaemolyticus serotype O3:K6 (strain AQ3810) GN=A79_4542 PE=4 SV=1	0	55.4907	43.7956	6	35	6	1	137	15.426	4.77	High	High	High		1.035	1.066	96.8	100.1	103.1	6	6	6	30.623	0	75.1216	6
FALSE	High	Master Protein	A6B707	Copper-translocating P-type ATPase OS=Vibrio parahaemolyticus serotype O3:K6 (strain AQ3810) GN=A79_5391 PE=3 SV=1	0	55.3207	18.8056	10	19	10	1	787	85.847	5.91	High	High	High		0.816	0.923	109.5	89.4	101.1	10	10	10	1.285	0	59.3984	10
FALSE	High	Master Protein	A6B1J8	Biosynthetic arginine decarboxylase OS=Vibrio parahaemolyticus serotype O3:K6 (strain AQ3810) GN=speA PE=3 SV=1	0	55.2193	16.7188	10	18	10	1	640	72.02	5.05	High	High	High		1.027	1.155	94.3	96.8	108.9	10	10	10	1.626	0	57.7426	10
FALSE	High	Master Protein	A6BAH5	RmuC family protein (Fragment) OS=Vibrio parahaemolyticus serotype O3:K6 (strain AQ3810) GN=A79_1457 PE=4 SV=1	0	55.1733	31.7808	10	19	2	1	365	42.337	6.42	High	High	High		1.049	1.134	94.2	98.9	106.9	2	2	2	1.913	0	57.3044	10
FALSE	High	Master Protein	A6B2W9	Protein-export protein SecB OS=Vibrio parahaemolyticus serotype O3:K6 (strain AQ3810) GN=secB PE=3 SV=1	0	54.6984	37.013	6	24	6	1	154	17.162	4.41	High	High	High		1.068	0.882	101.7	108.6	89.7	6	6	6	26.826	0	76.8176	6
FALSE	High	Master Protein	A6B8M2	Sigma54 specific transcriptional regulator, Fis family OS=Vibrio parahaemolyticus serotype O3:K6 (strain AQ3810) GN=A79_5078 PE=4 SV=1	0	54.6205	37.1336	9	13	1	1	307	34.566	5.43	High	High	High		0.888	0.734	114.5	101.6	84	1	1	1	3.084	0	48.2177	9
FALSE	High	Master Protein	A6B865	Pyridoxine 5'-phosphate synthase (Fragment) OS=Vibrio parahaemolyticus serotype O3:K6 (strain AQ3810) GN=pdxJ PE=3 SV=1	0	54.614	53.125	10	25	10	1	192	21.034	5.11	High	High	High		1.127	1.026	95.2	107.2	97.6	10	10	10	16.783	0	84.7471	10
FALSE	High	Master Protein	A6B1G2	Peptide transport periplasmic protein SapA OS=Vibrio parahaemolyticus serotype O3:K6 (strain AQ3810) GN=A79_0166 PE=4 SV=1	0	54.4289	27.0872	13	16	13	1	539	60.896	5.19	High	High	High		0.915	1.003	102.8	94.1	103.1	13	13	13	2.162	0	46.1876	13
FALSE	High	Master Protein	A6B3I0	Translation elongation factor OS=Vibrio parahaemolyticus serotype O3:K6 (strain AQ3810) GN=A79_2477 PE=4 SV=1	0	54.2527	21.3855	11	18	11	1	664	76.571	8.75	High	High	High		0.857	1.04	103.5	88.8	107.7	11	11	11	1.006	0	64.4134	11
FALSE	High	Master Protein	A6B637	Gamma-glutamyltransferase OS=Vibrio parahaemolyticus serotype O3:K6 (strain AQ3810) GN=ggt PE=4 SV=1	0	54.2032	20.6485	7	11	7	1	586	63.582	5.58	High	High	High		0.701	0.866	116.9	81.9	101.2	7	7	7	1.276	0	39.9254	7
FALSE	High	Master Protein	A6B7Z3	Sua5/YciO/YrdC/YwlC family protein OS=Vibrio parahaemolyticus serotype O3:K6 (strain AQ3810) GN=A79_3826 PE=4 SV=1	0	54.1819	50.9709	7	23	7	1	206	22.912	5.3	High	High	High		1.273	1.08	89.5	113.9	96.6	8	8	8	18.953	0	70.9632	7
FALSE	High	Master Protein	A6B683	Amidohydrolase 3 OS=Vibrio parahaemolyticus serotype O3:K6 (strain AQ3810) GN=A79_4876 PE=4 SV=1	0	54.0834	36.0465	10	19	4	1	344	38.969	6.06	High	High	High		0.906	1.047	101.6	92.1	106.3	10	10	10	2.899	6	50.4024	10
FALSE	High	Master Protein	A6B950	Khg/kdpg aldolase OS=Vibrio parahaemolyticus serotype O3:K6 (strain AQ3810) GN=A79_3363 PE=4 SV=1	0	54.0493	46.3054	5	11	5	1	203	21.776	4.77	High	High	High		0.734	1.26	100.2	73.6	126.3	5	5	5	4.995	0	48.353	5
FALSE	High	Master Protein	A6B3Y3	Phopholipase D-family protein OS=Vibrio parahaemolyticus serotype O3:K6 (strain AQ3810) GN=A79_2036 PE=4 SV=1	0	53.8603	22.9209	10	17	10	1	493	55.841	5.48	High	High	High		1.105	0.937	98.6	109	92.4	11	11	11	2.29	0	47.5117	10
FALSE	High	Master Protein	A6AWZ8	Transcriptional regulator, LysR family OS=Vibrio parahaemolyticus serotype O3:K6 (strain AQ3810) GN=A79_0437 PE=4 SV=1	0	53.7389	43.4783	11	18	11	1	299	33.092	6.61	High	High	High		1.187	0.906	97	115.1	87.9	11	11	11	3.281	0	46.3539	11
FALSE	High	Master Protein	A6B9L5	UTP--glucose-1-phosphate uridylyltransferase OS=Vibrio parahaemolyticus serotype O3:K6 (strain AQ3810) GN=galU PE=3 SV=1	0	53.7161	26.3699	5	20	1	1	292	32.304	5.03	High	High	High		0.939	0.921	104.9	98.5	96.6	3	3	3	5.494	0	69.6788	5
FALSE	High	Master Protein	A6BAZ6	Aspartokinase (Fragment) OS=Vibrio parahaemolyticus serotype O3:K6 (strain AQ3810) GN=A79_4547 PE=3 SV=1	0	53.6997	22.5275	7	15	7	1	364	39.016	4.89	High	High	High		1.082	1.007	97.1	105.1	97.8	8	8	8	1.848	0	52.1602	7
FALSE	High	Master Protein	A6B452	Glutamate synthase [NADPH] small chain OS=Vibrio parahaemolyticus serotype O3:K6 (strain AQ3810) GN=A79_2368 PE=4 SV=1	0	53.6452	24.6809	9	15	9	1	470	52.481	5.12	High	High	High		0.778	0.975	109	84.8	106.2	9	9	9	1.395	0	43.7753	9
FALSE	High	Master Protein	A6B315	Ion transport 2 OS=Vibrio parahaemolyticus serotype O3:K6 (strain AQ3810) GN=A79_2437 PE=4 SV=1	0	53.6395	25.072	9	20	9	1	347	38.372	6.46	High	High	High		1.057	0.926	100.6	106.3	93.1	11	11	11	3.329	0	59.6846	9
FALSE	High	Master Protein	A6BA73	Thymidylate synthase OS=Vibrio parahaemolyticus serotype O3:K6 (strain AQ3810) GN=A79_5232 PE=4 SV=1	0	53.6307	54.4118	8	23	2	1	136	15.448	8.44	High	High	High		0.723	1.061	107.8	77.9	114.4	2	2	2	24.119	0	53.8537	8
FALSE	High	Master Protein	A6B047	Uncharacterized protein OS=Vibrio parahaemolyticus serotype O3:K6 (strain AQ3810) GN=A79_2690 PE=4 SV=1	0	53.5612	25.3102	7	17	7	1	403	43.708	4.65	High	High	High		0.634	0.903	118.3	75	106.7	8	8	8	2.162	0	57.7193	7
FALSE	High	Master Protein	A6B4E4	Carboxy-S-adenosyl-L-methionine synthase OS=Vibrio parahaemolyticus serotype O3:K6 (strain AQ3810) GN=cmoA PE=3 SV=1	0	53.5566	35.5102	7	14	7	1	245	27.731	6.09	High	High	High		0.684	0.983	112.5	76.9	110.6	7	7	7	3.642	0	45.0036	7
FALSE	High	Master Protein	A6B3V9	Type IV pilus assembly protein PilZ OS=Vibrio parahaemolyticus serotype O3:K6 (strain AQ3810) GN=A79_2968 PE=4 SV=1	0	53.5143	21.9949	17	21	17	1	782	89.372	9.1	High	High	High		1.055	0.984	98.7	104.2	97.1	17	17	17	1.154	0	45.1947	17
FALSE	High	Master Protein	A6B001	Site-determining protein OS=Vibrio parahaemolyticus serotype O3:K6 (strain AQ3810) GN=A79_2642 PE=3 SV=1	0	53.5097	33.5593	9	25	9	1	295	32.045	7.46	High	High	High		1.257	1.011	91.8	115.4	92.8	9	9	9	3.281	0	70.0964	9
FALSE	High	Master Protein	A6B8T2	DNA recombination protein (Fragment) OS=Vibrio parahaemolyticus serotype O3:K6 (strain AQ3810) GN=A79_1804 PE=4 SV=1	0	53.3097	27.75	11	20	3	1	400	45.606	6.57	High	High	High		0.86	0.99	105.3	90.5	104.2	11	11	11	2.039	8	54.6191	11
FALSE	High	Master Protein	A6B4X8	Antibiotic biosynthesis monooxygenase domain protein OS=Vibrio parahaemolyticus serotype O3:K6 (strain AQ3810) GN=A79_3064 PE=4 SV=1	0	53.2599	65.9574	6	18	6	1	94	11.059	5.4	High	High	High		1.07	1.017	97.2	104	98.9	6	6	6	11.915	0	66.8012	6
FALSE	High	Master Protein	A6B2I2	Methyl-accepting chemotaxis protein OS=Vibrio parahaemolyticus serotype O3:K6 (strain AQ3810) GN=A79_1262 PE=4 SV=1	0	53.2538	22.0994	8	17	7	1	543	58.954	4.68	High	High	High		0.714	0.889	115.2	82.3	102.5	7	7	7	1.512	0	64.259	8
FALSE	High	Master Protein	A6B6U5	Uncharacterized protein (Fragment) OS=Vibrio parahaemolyticus serotype O3:K6 (strain AQ3810) GN=A79_5236 PE=4 SV=1	0	53.2221	43.5897	4	11	4	1	117	13.493	5.27	High	High	High		0.681	0.976	112.9	76.9	110.2	6	6	6	18.307	0	44.8146	4
FALSE	High	Master Protein	A6BA17	RNA polymerase sigma factor OS=Vibrio parahaemolyticus serotype O3:K6 (strain AQ3810) GN=rpoE PE=3 SV=1	0	53.1459	42.7083	6	13	6	1	192	21.74	5.49	High	High	High		0.946	0.958	103.3	97.8	98.9	7	7	7	2.981	0	54.4067	6
FALSE	High	Master Protein	A6B2U1	Uncharacterized protein OS=Vibrio parahaemolyticus serotype O3:K6 (strain AQ3810) GN=A79_2329 PE=4 SV=1	0	53.0615	54.5455	6	15	6	1	132	14.93	9.7	High	High	High		1.172	1.023	93.9	110	96.1	6	6	6	11.915	0	57.9632	6
FALSE	High	Master Protein	A6B0V0	Tyrosine-protein kinase wzc OS=Vibrio parahaemolyticus serotype O3:K6 (strain AQ3810) GN=A79_5413 PE=4 SV=1	0	53.0123	18.9152	11	14	11	1	719	78.95	6.34	High	High	High		0.662	1.069	109.9	72.8	117.4	11	11	11	0.974	0	39.9718	11
FALSE	High	Master Protein	A6B708	Uncharacterized protein OS=Vibrio parahaemolyticus serotype O3:K6 (strain AQ3810) GN=A79_5392 PE=4 SV=1	0	53.0119	42.4051	6	18	6	1	158	17.87	8.88	High	High	High		0.682	0.868	117.7	80.2	102.1	6	6	6	15.681	0	60.902	6
FALSE	High	Master Protein	A6B7G2	Chemotaxis protein CheX OS=Vibrio parahaemolyticus serotype O3:K6 (strain AQ3810) GN=A79_5551 PE=4 SV=1	0	52.9924	31.3725	3	10	3	1	153	16.754	5.3	High	High	High		0.602	0.934	118.3	71.2	110.5	4	4	4	24.119	0	46.3053	3
FALSE	High	Master Protein	A6B4Y7	Aldose 1-epimerase subfamily OS=Vibrio parahaemolyticus serotype O3:K6 (strain AQ3810) GN=A79_3073 PE=4 SV=1	0	52.9437	33.6735	8	22	8	1	294	32.298	4.75	High	High	High		0.82	1.028	105.3	86.4	108.3	8	8	8	3.87	0	76.7539	8
FALSE	High	Master Protein	A6B4L0	Short chain dehydrogenase OS=Vibrio parahaemolyticus serotype O3:K6 (strain AQ3810) GN=A79_5067 PE=3 SV=1	0	52.9313	29.6943	6	16	6	1	229	24.803	5.81	High	High	High		1.103	0.967	97.7	107.8	94.5	7	7	7	4.179	0	57.8544	6
FALSE	High	Master Protein	A6B4T6	Acriflavin resistance plasma membrane protein (Fragment) OS=Vibrio parahaemolyticus serotype O3:K6 (strain AQ3810) GN=A79_6295 PE=3 SV=1	0	52.7808	25.8706	15	29	15	1	603	64.977	5.21	High	High	High		1.059	1.088	95.3	100.9	103.7	15	15	15	4.38	0	71.393	15
FALSE	High	Master Protein	A6B0L6	Nitrate/nitrite response regulator protein NarP OS=Vibrio parahaemolyticus serotype O3:K6 (strain AQ3810) GN=A79_3729 PE=4 SV=1	0	52.7241	42.4528	10	19	10	1	212	23.679	5.2	High	High	High		1.042	1.006	98.4	102.5	99	11	11	11	7.577	0	53.0143	10
FALSE	High	Master Protein	A6B3P2	Probable transcriptional regulatory protein A79_0682 OS=Vibrio parahaemolyticus serotype O3:K6 (strain AQ3810) GN=A79_0682 PE=3 SV=1	0	52.6644	35.2941	7	22	7	1	238	26.137	4.88	High	High	High		0.855	1.14	100.2	85.6	114.2	9	9	9	11.589	0	65.8088	7
FALSE	High	Master Protein	A6AZA5	Uncharacterized protein OS=Vibrio parahaemolyticus serotype O3:K6 (strain AQ3810) GN=A79_4518 PE=4 SV=1	0	52.619	34.8837	8	21	8	1	172	18.943	5.64	High	High	High		1.269	0.962	92.9	117.8	89.3	8	8	8	11.589	0	78.0909	8
FALSE	High	Master Protein	A6B041	Bacterioferritin comigratory protein OS=Vibrio parahaemolyticus serotype O3:K6 (strain AQ3810) GN=A79_2683 PE=4 SV=1	0	52.6148	57.0513	5	13	5	1	156	17.51	6.02	High	High	High		0.972	1.005	100.8	98	101.3	6	6	6	12.335	0	58.2083	5
FALSE	High	Master Protein	A6B6J6	Lipoprotein OS=Vibrio parahaemolyticus serotype O3:K6 (strain AQ3810) GN=metQ PE=3 SV=1	0	52.5254	37.8277	8	11	8	1	267	28.991	5.5	High	High	High		0.882	1.01	103.7	91.5	104.8	8	8	8	2.875	0	36.7052	8
FALSE	High	Master Protein	A6B358	Phosphate-specific transport system accessory protein PhoU OS=Vibrio parahaemolyticus serotype O3:K6 (strain AQ3810) GN=phoU PE=3 SV=1	0	52.4804	26.7241	5	11	5	1	232	26.565	6.29	High	High	High		1.028	1.105	95.8	98.4	105.8	5	5	5	2.652	0	37.8321	5
FALSE	High	Master Protein	A6B4P9	Uncharacterized protein OS=Vibrio parahaemolyticus serotype O3:K6 (strain AQ3810) GN=A79_1920 PE=4 SV=1	0	52.4771	43.379	8	17	8	1	219	24.585	5.86	High	High	High		1.051	1.137	94.1	98.9	107	9	9	9	14.199	0	53.6906	8
FALSE	High	Master Protein	A6AY94	Outer membrane protein OS=Vibrio parahaemolyticus serotype O3:K6 (strain AQ3810) GN=A79_1490 PE=4 SV=1	0	52.1846	29.8429	7	29	7	1	191	21.082	4.73	High	High	High		0.962	1.257	93.2	89.7	117.1	8	8	8	9	0	83.5111	7
FALSE	High	Master Protein	A6AZ28	3-mercaptopyruvate sulfurtransferase OS=Vibrio parahaemolyticus serotype O3:K6 (strain AQ3810) GN=A79_4440 PE=4 SV=1	0	52.1306	31.5217	6	13	6	1	276	30.423	5.2	High	High	High		0.931	0.876	106.9	99.5	93.6	7	7	7	3.924	0	53.2054	6
FALSE	High	Master Protein	A6B2N3	Type II secretion system protein M OS=Vibrio parahaemolyticus serotype O3:K6 (strain AQ3810) GN=A79_0074 PE=3 SV=1	0	52.069	42.3313	6	18	6	1	163	18.719	9.64	High	High	High		1.097	0.963	98	107.6	94.4	6	6	6	11.915	0	54.0414	6
FALSE	High	Master Protein	A6B6U2	C-processing peptidase OS=Vibrio parahaemolyticus serotype O3:K6 (strain AQ3810) GN=prc PE=4 SV=1	0	52.0278	22.9042	13	14	13	1	668	75.578	5.3	High	High	High		0.603	0.94	118	71.1	110.9	13	13	13	1.047	0	40.6671	13
FALSE	High	Master Protein	A6BBG1	Phosphatidylserine decarboxylase proenzyme (Fragment) OS=Vibrio parahaemolyticus serotype O3:K6 (strain AQ3810) GN=psd PE=3 SV=1	0	51.9817	41.4343	8	17	8	1	251	27.976	5.49	High	High	High		0.973	1.019	100.3	97.5	102.2	9	9	9	7.483	0	51.9287	8
FALSE	High	Master Protein	A6B503	Magnesium and cobalt efflux protein CorB OS=Vibrio parahaemolyticus serotype O3:K6 (strain AQ3810) GN=A79_3783 PE=4 SV=1	0	51.9796	23.7089	7	15	7	1	426	47.535	6.09	High	High	High		1.325	0.893	93.2	123.5	83.3	7	7	7	2.875	0	56.7494	7
FALSE	High	Master Protein	A6AZG3	Cysteine desulfurase OS=Vibrio parahaemolyticus serotype O3:K6 (strain AQ3810) GN=A79_4273 PE=3 SV=1	0	51.9653	23.0769	7	13	7	1	403	43.904	5.48	High	High	High		1.096	1.066	94.9	104	101.1	7	7	7	2.36	0	48.1119	7
FALSE	High	Master Protein	A6B746	GTP cyclohydrolase-2 OS=Vibrio parahaemolyticus serotype O3:K6 (strain AQ3810) GN=ribA PE=3 SV=1	0	51.8859	51.3761	8	18	8	1	218	24.523	7.01	High	High	High		0.702	0.991	111.4	78.2	110.4	8	8	8	3.642	0	62.6953	8
FALSE	High	Master Protein	A6B7U9	Glycosyl transferase, family 39 OS=Vibrio parahaemolyticus serotype O3:K6 (strain AQ3810) GN=A79_2269 PE=4 SV=1	0	51.8609	10.9756	7	18	7	1	574	65.898	8.94	High	High	High		1.488	0.958	87.1	129.5	83.4	9	9	9	1.593	0	55.9432	7
FALSE	High	Master Protein	A6B7X3	Cyclic nucleotide binding protein/2 CBS domains (Fragment) OS=Vibrio parahaemolyticus serotype O3:K6 (strain AQ3810) GN=A79_2010 PE=4 SV=1	0	51.8583	36.4055	6	11	6	1	217	24.701	4.54	High	High	High		1.124	0.953	97.5	109.6	92.9	7	7	7	4.878	0	39.1296	6
FALSE	High	Master Protein	A6AX96	Thioesterase family protein OS=Vibrio parahaemolyticus serotype O3:K6 (strain AQ3810) GN=A79_0536 PE=4 SV=1	0	51.8485	40.3727	7	18	7	1	161	17.613	7.02	High	High	High		1.183	0.982	94.8	112.1	93.1	7	7	7	11.328	0	49.6997	7
FALSE	High	Master Protein	A6B7K8	Ribosomal protein L11 methyltransferase OS=Vibrio parahaemolyticus serotype O3:K6 (strain AQ3810) GN=prmA PE=3 SV=1	0	51.8279	23.7288	5	15	5	1	295	32.505	4.4	High	High	High		0.824	1.109	102.3	84.2	113.5	5	5	5	2.981	0	58.2829	5
FALSE	High	Master Protein	A6B7A7	Nuclease OS=Vibrio parahaemolyticus serotype O3:K6 (strain AQ3810) GN=A79_2711 PE=4 SV=1	0	51.7543	16.9304	8	12	6	1	632	68.678	4.7	High	High	High		0.571	0.86	123.4	70.5	106.1	8	8	8	1.326	2	39.5839	8
FALSE	High	Master Protein	A6B5G4	Outer membrane protein OS=Vibrio parahaemolyticus serotype O3:K6 (strain AQ3810) GN=A79_3985 PE=3 SV=1	0	51.6523	47.0874	5	12	5	1	206	22.867	5.14	High	High	High		0.523	0.868	125.5	65.6	108.9	5	5	5	4.337	0	63.2238	5
FALSE	High	Master Protein	A6B3N3	Response regulator OS=Vibrio parahaemolyticus serotype O3:K6 (strain AQ3810) GN=A79_0673 PE=4 SV=1	0	51.5869	47.9087	8	13	8	1	263	29.618	5.9	High	High	High		1.169	0.942	96.4	112.7	90.9	8	8	8	3.642	0	48.6407	8
FALSE	High	Master Protein	A6B1J5	Heat shock protein HslJ OS=Vibrio parahaemolyticus serotype O3:K6 (strain AQ3810) GN=A79_0199 PE=4 SV=1	0	51.5253	31.0811	4	16	4	1	148	16.586	5.14	High	High	High		1.124	0.955	97.4	109.5	93	4	4	4	9	0	67.1844	4
FALSE	High	Master Protein	A6B4P2	Negative modulator of initiation of replication OS=Vibrio parahaemolyticus serotype O3:K6 (strain AQ3810) GN=seqA PE=3 SV=1	0	51.5036	33.5135	5	16	5	1	185	20.53	6.81	High	High	High		0.56	1.031	115.8	64.9	119.3	6	6	6	5.579	0	58.4021	5
FALSE	High	Master Protein	A6B0Y9	Glycogen operon protein GlgX homolog OS=Vibrio parahaemolyticus serotype O3:K6 (strain AQ3810) GN=glgX PE=3 SV=1	0	51.3109	19.457	12	19	12	1	663	75.917	6.68	High	High	High		0.875	0.952	106.1	92.9	101	12	12	12	1.198	0	56.449	12
FALSE	High	Master Protein	A6AYK7	Probable lipid kinase YegS-like OS=Vibrio parahaemolyticus serotype O3:K6 (strain AQ3810) GN=A79_1604 PE=3 SV=1	0	51.2423	26.4214	6	20	6	1	299	32.33	5.54	High	High	High		0.813	0.569	125.9	102.4	71.7	7	7	7	6.197	0	60.8363	6
FALSE	High	Master Protein	A6AYM0	Arylsulfatase OS=Vibrio parahaemolyticus serotype O3:K6 (strain AQ3810) GN=A79_1617 PE=4 SV=1	0	51.2119	26.0194	11	25	11	1	515	58.262	6.98	High	High	High		1.247	1.371	82.9	103.4	113.7	11	11	11	2.039	0	66.5514	11
FALSE	High	Master Protein	A6B7R1	Tryptophan biosynthesis protein trpCF OS=Vibrio parahaemolyticus serotype O3:K6 (strain AQ3810) GN=A79_4631 PE=3 SV=1	0	50.8316	26.4033	9	19	9	1	481	52.932	5.55	High	High	High		0.983	0.985	101.1	99.4	99.6	9	9	9	1.395	0	58.5265	9
FALSE	High	Master Protein	A6B6V5	Sigma-54 dependent transcriptional regulator OS=Vibrio parahaemolyticus serotype O3:K6 (strain AQ3810) GN=A79_5246 PE=4 SV=1	0	50.7862	22.5225	8	15	8	1	444	49.583	6.67	High	High	High		0.737	0.999	109.7	80.8	109.5	8	8	8	1.424	0	52.8414	8
FALSE	High	Master Protein	A6BA52	NH(3)-dependent NAD(+) synthetase OS=Vibrio parahaemolyticus serotype O3:K6 (strain AQ3810) GN=nadE PE=3 SV=1	0	50.7836	42.3913	5	15	5	1	184	19.886	5.59	High	High	High		0.936	1.023	101.4	94.9	103.7	5	5	5	6.743	0	62.3672	5
FALSE	High	Master Protein	A6B1C2	Adenylosuccinate synthetase OS=Vibrio parahaemolyticus serotype O3:K6 (strain AQ3810) GN=purA PE=3 SV=1	0	50.7743	34.9282	9	12	9	1	418	45.624	4.91	High	High	High		0.831	1.182	99.6	82.8	117.7	9	9	9	1.555	0	47.273	9
FALSE	High	Master Protein	A6AZQ9	3-oxoacyl-[acyl-carrier-protein] synthase 3 OS=Vibrio parahaemolyticus serotype O3:K6 (strain AQ3810) GN=fabH PE=3 SV=1	0	50.7181	37.9121	9	11	9	1	364	39.425	5.11	High	High	High		0.917	0.903	106.4	97.5	96.1	9	9	9	1.683	0	44.1538	9
FALSE	High	Master Protein	A6B2T9	Dehydrogenase OS=Vibrio parahaemolyticus serotype O3:K6 (strain AQ3810) GN=A79_2327 PE=4 SV=1	0	50.6995	21.7391	7	11	7	1	414	45.959	5.15	High	High	High		0.896	1.071	101.1	90.6	108.3	7	7	7	1.721	0	34.6933	7
FALSE	High	Master Protein	A6B8P0	Transcriptional regulator, TetR family OS=Vibrio parahaemolyticus serotype O3:K6 (strain AQ3810) GN=A79_4055 PE=4 SV=1	0	50.6564	32.8571	5	10	5	1	210	24.128	9	High	High	High		0.902	1.008	103.1	93	104	6	6	6	4.623	0	40.1156	5
FALSE	High	Master Protein	A6BAZ2	tRNA-I(6)A37 thiotransferase enzyme MiaB (Fragment) OS=Vibrio parahaemolyticus serotype O3:K6 (strain AQ3810) GN=miaB PE=4 SV=1	0	50.6514	37.7049	7	14	6	1	305	34.669	5.76	High	High	High		0.589	1.069	112.9	66.5	120.7	7	7	7	2.36	0	47.0899	7
FALSE	High	Master Protein	A6AYR7	DNA-3-methyladenine glycosylase OS=Vibrio parahaemolyticus serotype O3:K6 (strain AQ3810) GN=A79_6146 PE=4 SV=1	0	50.6354	57.8947	11	17	11	1	228	25.952	7.59	High	High	High		1.241	1.048	91.2	113.2	95.6	11	11	11	5.494	0	48.9887	11
FALSE	High	Master Protein	A6BAI5	Protein VisC (Fragment) OS=Vibrio parahaemolyticus serotype O3:K6 (strain AQ3810) GN=A79_4218 PE=4 SV=1	0	50.6202	31.9588	10	19	5	1	291	31.818	8.29	High	High	High		0.888	1.003	103.7	92.2	104.1	10	10	10	4.275	5	54.2562	10
FALSE	High	Master Protein	A6B9I9	50S ribosomal protein L29 OS=Vibrio parahaemolyticus serotype O3:K6 (strain AQ3810) GN=rpmC PE=3 SV=1	0	50.615	58.7302	4	14	4	1	63	7.189	9.82	High	High	High		0.247	0.7	154.1	38.1	107.8	6	6	6	55.234	0	56.1468	4
FALSE	High	Master Protein	A6B9T7	Putative ribosome biogenesis GTPase RsgA OS=Vibrio parahaemolyticus serotype O3:K6 (strain AQ3810) GN=rsgA PE=3 SV=1	0	50.5302	29.661	10	18	10	1	354	39.973	5.57	High	High	High		0.978	0.986	101.2	99	99.8	10	10	10	2.981	0	52.6686	10
FALSE	High	Master Protein	A6B0G9	Cytosine deaminase OS=Vibrio parahaemolyticus serotype O3:K6 (strain AQ3810) GN=A79_3682 PE=4 SV=1	0	50.4842	19.7647	7	12	7	1	425	47.939	6.02	High	High	High		1.017	1.01	99.1	100.8	100.1	7	7	7	2.162	0	40.7238	7
FALSE	High	Master Protein	A6B3F3	ABC transporter, ATP-binding protein OS=Vibrio parahaemolyticus serotype O3:K6 (strain AQ3810) GN=A79_1175 PE=4 SV=1	0	50.3257	53.7879	10	18	10	1	264	28.643	5.52	High	High	High		1.146	0.927	97.6	111.8	90.5	10	10	10	4.08	0	60.6876	10
FALSE	High	Master Protein	A6B2L4	DNA-directed RNA polymerase subunit omega OS=Vibrio parahaemolyticus serotype O3:K6 (strain AQ3810) GN=rpoZ PE=3 SV=1	0	50.2751	81.1111	7	18	7	1	90	10.016	5.07	High	High	High		0.305	0.876	137.5	42	120.5	7	7	7	18.307	0	62.0266	7
FALSE	High	Master Protein	A6B403	Transcription antitermination protein RfaH OS=Vibrio parahaemolyticus serotype O3:K6 (strain AQ3810) GN=rfaH PE=3 SV=1	0	50.2173	59.6386	10	17	10	1	166	19.263	8.22	High	High	High		0.976	0.951	102.5	100.1	97.4	10	10	10	9	0	49.9881	10
FALSE	High	Master Protein	A6BBP0	7,8-dihydroneopterin aldolase OS=Vibrio parahaemolyticus serotype O3:K6 (strain AQ3810) GN=folB PE=3 SV=1	0	50.159	59.6639	6	21	6	1	119	13.375	4.97	High	High	High		0.79	0.966	108.9	86	105.1	8	8	8	30.623	0	57.8767	6
FALSE	High	Master Protein	A6B7F7	ABC-type Fe3+-hydroxamate transport system, periplasmic component OS=Vibrio parahaemolyticus serotype O3:K6 (strain AQ3810) GN=A79_5546 PE=4 SV=1	0	50.0853	35.6164	5	9	5	1	219	24.446	4.73	High	High	High		1.162	1	94.9	110.2	94.9	5	5	5	4.337	0	37.9706	5
FALSE	High	Master Protein	A6B3S9	Sensory box/ggdef family protein OS=Vibrio parahaemolyticus serotype O3:K6 (strain AQ3810) GN=A79_3880 PE=4 SV=1	0	49.7729	32.1782	11	17	11	1	404	46.456	5.12	High	High	High		1.196	1.018	93.3	111.7	95	11	11	11	2.311	0	48.5663	11
FALSE	High	Master Protein	A6B463	Mutator MutT protein OS=Vibrio parahaemolyticus serotype O3:K6 (strain AQ3810) GN=A79_2379 PE=3 SV=1	0	49.753	65.9091	6	17	6	1	132	15.266	4.89	High	High	High		0.534	0.831	126.8	67.7	105.4	6	6	6	11.915	0	60.8722	6
FALSE	High	Master Protein	A6B9M4	30S ribosomal protein S10 OS=Vibrio parahaemolyticus serotype O3:K6 (strain AQ3810) GN=rpsJ PE=3 SV=1	0	49.6845	47.5728	7	26	7	1	103	11.713	9.98	High	High	High		0.439	1.118	117.3	51.5	131.2	8	8	8	55.234	0	83.7946	7
FALSE	High	Master Protein	A6B8I4	UDP-N-acetylenolpyruvoylglucosamine reductase OS=Vibrio parahaemolyticus serotype O3:K6 (strain AQ3810) GN=murB PE=3 SV=1	0	49.6368	29.683	9	12	9	1	347	38.423	5.67	High	High	High		0.9	0.925	106.2	95.6	98.2	9	9	9	3.87	0	39.6758	9
FALSE	High	Master Protein	A6B4B0	TldD OS=Vibrio parahaemolyticus serotype O3:K6 (strain AQ3810) GN=A79_0109 PE=4 SV=1	0	49.5962	18.2213	7	9	7	1	461	49.448	6.14	High	High	High		1.038	1.039	97.5	101.2	101.3	7	7	7	1.096	0	37.2883	7
FALSE	High	Master Protein	A6B3T4	Ribosome-binding factor A OS=Vibrio parahaemolyticus serotype O3:K6 (strain AQ3810) GN=rbfA PE=3 SV=1	0	49.5063	40.458	5	23	5	1	131	15.272	7.99	High	High	High		0.81	1.068	104.2	84.5	111.3	7	7	7	11.915	0	67.4154	5
FALSE	High	Master Protein	A6AZ42	Bifunctional NAD(P)H-hydrate repair enzyme OS=Vibrio parahaemolyticus serotype O3:K6 (strain AQ3810) GN=A79_4454 PE=3 SV=1	0	49.503	19.2982	8	16	8	1	513	55.027	6.18	High	High	High		1.138	1.018	95.1	108.2	96.7	8	8	8	1.326	0	53.6624	8
FALSE	High	Master Protein	A6B9T1	UPF0307 protein A79_0124 OS=Vibrio parahaemolyticus serotype O3:K6 (strain AQ3810) GN=A79_0124 PE=3 SV=1	0	49.4844	41.1429	6	20	6	1	175	20.475	8.27	High	High	High		0.345	0.979	129.1	44.5	126.4	7	7	7	9	0	64.8885	6
FALSE	High	Master Protein	A6B0R9	ImpC OS=Vibrio parahaemolyticus serotype O3:K6 (strain AQ3810) GN=A79_3495 PE=4 SV=1	0	49.4645	28.7726	12	16	11	1	497	55.347	5.2	High	High	High		0.559	0.833	125.4	70.1	104.5	12	12	12	1.477	1	46.4071	12
FALSE	High	Master Protein	A6B0U8	Capsular polysaccharide transport protein OS=Vibrio parahaemolyticus serotype O3:K6 (strain AQ3810) GN=A79_4802 PE=4 SV=1	0	49.4456	25.4692	7	17	7	1	373	40.668	5.59	High	High	High		0.822	0.954	108.1	88.8	103.1	8	8	8	4.817	0	53.0535	7
FALSE	High	Master Protein	A6BB09	Amino acid ABC transporter, ATP-binding protein OS=Vibrio parahaemolyticus serotype O3:K6 (strain AQ3810) GN=A79_2223 PE=4 SV=1	0	49.3645	41.6327	11	18	11	1	245	27.275	5.9	High	High	High		0.916	1.026	101.9	93.4	104.6	11	11	11	4.623	0	51.1128	11
FALSE	High	Master Protein	A6B9N8	Threonine synthase OS=Vibrio parahaemolyticus serotype O3:K6 (strain AQ3810) GN=A79_3230 PE=4 SV=1	0	49.3435	26.8519	5	15	5	1	216	23.253	4.79	High	High	High		1.001	1.079	97.4	97.5	105.1	6	6	6	5.813	0	42.8699	5
FALSE	High	Master Protein	A6B1S7	Pyruvate dehydrogenase E1 component subunit beta OS=Vibrio parahaemolyticus serotype O3:K6 (strain AQ3810) GN=A79_5301 PE=4 SV=1	0	49.3048	27.5229	8	14	8	1	327	35.899	6.46	High	High	High		1.497	1.004	85.7	128.3	86.1	8	8	8	6.356	0	36.4259	8
FALSE	High	Master Protein	A6BA32	Ribosomal RNA large subunit methyltransferase H OS=Vibrio parahaemolyticus serotype O3:K6 (strain AQ3810) GN=rlmH PE=3 SV=1	0	49.2724	62.1795	10	20	10	1	156	17.406	8.66	High	High	High		0.887	0.991	104.3	92.5	103.3	10	10	10	11.328	0	57.6791	10
FALSE	High	Master Protein	A6B346	Preprotein translocase, YajC subunit OS=Vibrio parahaemolyticus serotype O3:K6 (strain AQ3810) GN=yajC PE=4 SV=1	0	48.8348	47.7064	5	20	5	1	109	11.832	8.4	High	High	High		1.359	0.944	90.8	123.4	85.7	6	6	6	157.489	0	59.3766	5
FALSE	High	Master Protein	A6B3E7	Na(+)/H(+) antiporter NhaB OS=Vibrio parahaemolyticus serotype O3:K6 (strain AQ3810) GN=nhaB PE=3 SV=1	0	48.6665	12.1212	6	24	6	1	528	57.128	5.41	High	High	High		1.102	0.962	97.9	107.9	94.2	7	7	7	2.548	0	75.3533	6
FALSE	High	Master Protein	A6B514	Tmao reductase sytem sensor tors OS=Vibrio parahaemolyticus serotype O3:K6 (strain AQ3810) GN=torS PE=4 SV=1	0	48.6385	20.0553	12	17	12	1	723	80.773	5.27	High	High	High		1.065	0.888	101.6	108.2	90.2	12	12	12	0.848	0	50.0999	12
FALSE	High	Master Protein	A6B9Z1	Methyl-accepting chemotaxis protein (Fragment) OS=Vibrio parahaemolyticus serotype O3:K6 (strain AQ3810) GN=A79_4664 PE=4 SV=1	0	48.5431	25.7042	5	15	4	1	284	30.404	4.67	High	High	High		1.25	0.948	93.8	117.3	88.9	4	4	4	4.337	0	56.0374	5
FALSE	High	Master Protein	A6B0M1	Membrane-fusion protein OS=Vibrio parahaemolyticus serotype O3:K6 (strain AQ3810) GN=A79_3734 PE=3 SV=1	0	48.5293	26.1333	7	14	7	1	375	40.691	5.77	High	High	High		0.881	1.029	103.1	90.8	106.1	7	7	7	1.462	0	46.8223	7
FALSE	High	Master Protein	A6B6L8	Regulator of ribonuclease activity B OS=Vibrio parahaemolyticus serotype O3:K6 (strain AQ3810) GN=rraB PE=3 SV=1	0	48.4785	64.2336	5	13	5	1	137	15.646	3.92	High	High	High		0.872	1.052	102.6	89.5	107.9	6	6	6	18.307	0	50.7353	5
FALSE	High	Master Protein	A6B4V0	Acyl-CoA thioesterase II OS=Vibrio parahaemolyticus serotype O3:K6 (strain AQ3810) GN=tesB PE=4 SV=1	0	48.3918	30.7692	5	13	5	1	286	32.622	6.92	High	High	High		1.05	0.986	98.8	103.7	97.5	5	5	5	2.831	0	59.559	5
FALSE	High	Master Protein	A6B8N0	General secretion pathway protein G OS=Vibrio parahaemolyticus serotype O3:K6 (strain AQ3810) GN=gspG PE=4 SV=1	0	48.3439	32.6531	3	7	3	1	147	16.151	4.86	High	High	High		0.834	0.838	112.3	93.6	94.1	4	4	4	55.234	0	31.6913	3
FALSE	High	Master Protein	A6B558	N-acetylmuramic acid 6-phosphate etherase OS=Vibrio parahaemolyticus serotype O3:K6 (strain AQ3810) GN=murQ PE=3 SV=1	0	48.1808	21.7532	6	14	6	1	308	32.734	5.21	High	High	High		0.88	0.874	109	95.8	95.2	7	7	7	2.548	0	42.58	6
FALSE	High	Master Protein	A6B3W0	DNA repair protein RadA OS=Vibrio parahaemolyticus serotype O3:K6 (strain AQ3810) GN=radA PE=3 SV=1	0	48.0775	21.7865	9	17	9	1	459	49.191	7.47	High	High	High		1.003	0.988	100.3	100.6	99.1	9	9	9	1.683	0	53.2746	9
FALSE	High	Master Protein	A6B6T0	Fumarate hydratase class II OS=Vibrio parahaemolyticus serotype O3:K6 (strain AQ3810) GN=fumC PE=3 SV=1	0	48.0559	26.2473	12	20	12	1	461	48.699	5	High	High	High		1.078	0.942	99.4	107.1	93.6	12	12	12	3.642	0	55.9681	12
FALSE	High	Master Protein	A6B2A4	Iron-sulfur cluster-binding protein OS=Vibrio parahaemolyticus serotype O3:K6 (strain AQ3810) GN=A79_5116 PE=4 SV=1	0	47.9605	18.264	7	12	7	1	553	60.257	4.92	High	High	High		0.694	1.144	105.7	73.4	120.9	7	7	7	1.424	0	40.8703	7
FALSE	High	Master Protein	A6B6X7	50S ribosomal protein L20 OS=Vibrio parahaemolyticus serotype O3:K6 (strain AQ3810) GN=rplT PE=3 SV=1	0	47.9342	29.0598	8	28	8	1	117	13.376	11.47	High	High	High		0.341	0.96	130.4	44.5	125.1	8	8	8	24.119	0	71.2754	8
FALSE	High	Master Protein	A6B6E2	RNA polymerase sigma factor RpoS OS=Vibrio parahaemolyticus serotype O3:K6 (strain AQ3810) GN=rpoS PE=3 SV=1	0	47.9049	36.1314	8	12	1	1	274	31.527	5.31	High	High	High		0.798	0.717	119.3	95.2	85.5	1	1	1	2.652	0	42.2698	8
FALSE	High	Master Protein	A6B5Y7	UDP-N-acetylglucosamine--N-acetylmuramyl-(pentapeptide) pyrophosphoryl-undecaprenol N-acetylglucosamine transferase OS=Vibrio parahaemolyticus serotype O3:K6 (strain AQ3810) GN=murG PE=3 SV=1	0	47.7868	25.9155	8	12	8	1	355	38.226	8.53	High	High	High		1.096	1.012	96.5	105.8	97.7	8	8	8	3.437	0	40.6304	8
FALSE	High	Master Protein	A6AX32	Phosphate ABC transporter, periplasmic phosphate-binding protein OS=Vibrio parahaemolyticus serotype O3:K6 (strain AQ3810) GN=A79_0472 PE=4 SV=1	0	47.6492	28.5714	5	8	5	1	273	28.696	8.16	High	High	High		0.906	5.549	40.2	36.4	223.3	5	5	5	1.448	0	27.4584	5
FALSE	High	Master Protein	A6B8F9	General secretion pathway protein A OS=Vibrio parahaemolyticus serotype O3:K6 (strain AQ3810) GN=A79_1761 PE=4 SV=1	0	47.6355	21.3358	10	14	10	1	539	60.487	6.96	High	High	High		1.131	0.992	96.1	108.6	95.3	10	10	10	1.264	0	40.0891	10
FALSE	High	Master Protein	A6B7B8	ABC transporter, ATP-binding protein (Fragment) OS=Vibrio parahaemolyticus serotype O3:K6 (strain AQ3810) GN=A79_2722 PE=4 SV=1	0	47.6258	20.1018	8	15	5	1	393	44.572	5.48	High	High	High		0.848	0.945	107.4	91.1	101.5	9	9	9	2.511	3	49.2202	8
FALSE	High	Master Protein	A6B5S8	Prolyl endopeptidase OS=Vibrio parahaemolyticus serotype O3:K6 (strain AQ3810) GN=pep PE=4 SV=1	0	47.5778	15.7163	9	11	8	1	719	79.793	5.88	High	High	High		0.645	0.904	117.7	75.9	106.4	8	8	8	0.643	0	35.8311	9
FALSE	High	Master Protein	A6B9K3	Uncharacterized protein OS=Vibrio parahaemolyticus serotype O3:K6 (strain AQ3810) GN=A79_1766 PE=4 SV=1	0	47.5705	21.2987	8	18	8	1	385	43.946	6.37	High	High	High		1.025	1.26	91.3	93.6	115.1	9	9	9	2.675	0	55.7258	8
FALSE	High	Master Protein	A6B4S6	Peptide ABC transporter, permease protein OS=Vibrio parahaemolyticus serotype O3:K6 (strain AQ3810) GN=A79_6280 PE=3 SV=1	0	47.525	14.7799	7	24	7	1	318	34.88	5.72	High	High	High		1.747	1.123	77.5	135.4	87.1	9	9	9	22.101	0	59.181	7
FALSE	High	Master Protein	A6B7N9	Transcriptional regulator, MarR family OS=Vibrio parahaemolyticus serotype O3:K6 (strain AQ3810) GN=A79_2150 PE=4 SV=1	0	47.5192	40	6	16	6	1	150	17.489	9.74	High	High	High		0.86	0.946	106.9	91.9	101.1	6	6	6	7.111	0	49.0293	6
FALSE	High	Master Protein	A6B6S9	Sensor histidine kinase OS=Vibrio parahaemolyticus serotype O3:K6 (strain AQ3810) GN=A79_3587 PE=4 SV=1	0	47.5033	9.53631	6	7	6	1	1143	126.5	7.17	High	High	High		0.919	0.838	108.8	100	91.2	6	6	6	0.372	0	30.0826	6
FALSE	High	Master Protein	A6B5Z9	Valine--pyruvate aminotransferase OS=Vibrio parahaemolyticus serotype O3:K6 (strain AQ3810) GN=A79_3904 PE=4 SV=1	0	47.4067	20.6235	6	24	6	1	417	46.556	4.84	High	High	High		0.738	0.98	110.4	81.5	108.1	7	7	7	1.976	0	84.2238	6
FALSE	High	Master Protein	A6B563	Two-component response regulator OS=Vibrio parahaemolyticus serotype O3:K6 (strain AQ3810) GN=A79_2106 PE=4 SV=1	0	47.3706	43.3884	7	11	7	1	242	26.975	5.05	High	High	High		1.133	0.958	97.1	110	92.9	7	7	7	9	0	37.1009	7
FALSE	High	Master Protein	A6B4W7	Nucleoid-associated protein A79_3053 OS=Vibrio parahaemolyticus serotype O3:K6 (strain AQ3810) GN=A79_3053 PE=3 SV=1	0	47.3469	75.2294	6	10	6	1	109	12.015	4.94	High	High	High		0.604	0.947	117.6	71	111.4	6	6	6	12.335	0	34.3725	6
FALSE	High	Master Protein	A6B0F5	Response regulator OS=Vibrio parahaemolyticus serotype O3:K6 (strain AQ3810) GN=A79_3668 PE=4 SV=1	0	47.3281	39.2405	6	10	6	1	237	26.55	5.29	High	High	High		0.895	0.977	104.5	93.4	102.1	7	7	7	9	0	34.3992	6
FALSE	High	Master Protein	A6B2X6	Elongation factor P--(R)-beta-lysine ligase OS=Vibrio parahaemolyticus serotype O3:K6 (strain AQ3810) GN=epmA PE=3 SV=1	0	47.2796	30.6502	7	11	7	1	323	36.271	5.17	High	High	High		0.967	0.888	105.1	101.6	93.3	7	7	7	1.994	0	38.4045	7
FALSE	High	Master Protein	A6B8J6	Ribonuclease 3 OS=Vibrio parahaemolyticus serotype O3:K6 (strain AQ3810) GN=rnc PE=3 SV=1	0	47.2019	32.8889	7	15	7	1	225	25.052	8.1	High	High	High		0.616	1.104	110.3	67.9	121.8	7	7	7	3.642	0	44.8191	7
FALSE	High	Master Protein	A6B4I0	Exodeoxyribonuclease 7 large subunit OS=Vibrio parahaemolyticus serotype O3:K6 (strain AQ3810) GN=xseA PE=3 SV=1	0	47.1812	22.3476	9	12	9	1	443	49.812	9.38	High	High	High		0.86	0.954	106.6	91.7	101.7	9	9	9	1.371	0	35.834	9
FALSE	High	Master Protein	A6B813	Maf-like protein maf OS=Vibrio parahaemolyticus serotype O3:K6 (strain AQ3810) GN=maf PE=3 SV=1	0	47.1724	43.9153	6	15	6	1	189	20.969	5.07	High	High	High		1.064	1.002	97.8	104.1	98	7	7	7	11.915	0	47.3209	6
FALSE	High	Master Protein	A6B5H7	Zn-dependent protease with chaperone function OS=Vibrio parahaemolyticus serotype O3:K6 (strain AQ3810) GN=A79_4401 PE=3 SV=1	0	47.0329	35.4962	6	11	6	1	262	28.142	8.69	High	High	High		0.632	0.987	114.5	72.4	113	6	6	6	2.415	0	46.9592	6
FALSE	High	Master Protein	A6B1M6	Transcriptional regulator, MerR family OS=Vibrio parahaemolyticus serotype O3:K6 (strain AQ3810) GN=A79_6007 PE=4 SV=1	0	47.0116	18.7259	8	10	8	1	518	57.806	6.87	High	High	High		0.975	0.954	102.5	99.8	97.7	8	8	8	1.102	0	36.5946	8
FALSE	High	Master Protein	A6AX39	von Willebrand factor, type A OS=Vibrio parahaemolyticus serotype O3:K6 (strain AQ3810) GN=A79_0479 PE=4 SV=1	0	46.8801	26.9461	7	12	7	1	334	37.716	5.86	High	High	High		0.912	0.947	104.9	95.7	99.3	7	7	7	2.162	0	36.829	7
FALSE	High	Master Protein	A6B8W3	Hemerythrin HHE cation binding domain subfamily, putative OS=Vibrio parahaemolyticus serotype O3:K6 (strain AQ3810) GN=A79_6264 PE=4 SV=1	0	46.834	22.9508	6	26	6	1	183	22.059	5.11	High	High	High		0.608	0.843	122.4	74.4	103.2	8	8	8	18.953	0	67.2034	6
FALSE	High	Master Protein	A6B4U9	Glycoprotein/polysaccharide metabolism OS=Vibrio parahaemolyticus serotype O3:K6 (strain AQ3810) GN=A79_1378 PE=4 SV=1	0	46.7559	49.3056	5	29	5	1	144	15.771	5.87	High	High	High		1.378	1.064	87.2	120.1	92.7	6	6	6	36.276	0	92.6492	5
FALSE	High	Master Protein	A6B7L0	Acetyl-CoA carboxylase, biotin carboxyl carrier protein OS=Vibrio parahaemolyticus serotype O3:K6 (strain AQ3810) GN=accB PE=4 SV=1	0	46.6358	37.5	4	8	4	1	152	15.796	4.65	High	High	High		0.223	0.386	186.5	41.5	72	4	4	4	13.678	0	29.8449	4
FALSE	High	Master Protein	A6BAL5	ATP-dependent protease subunit HslV OS=Vibrio parahaemolyticus serotype O3:K6 (strain AQ3810) GN=hslV PE=3 SV=1	0	46.6069	24.5902	3	16	3	1	183	19.571	5.82	High	High	High		0.755	0.906	112.8	85.1	102.1	3	3	3	13.678	0	63.7362	3
FALSE	High	Master Protein	A6B943	Glutaredoxin, GrxA family OS=Vibrio parahaemolyticus serotype O3:K6 (strain AQ3810) GN=grxA PE=4 SV=1	0	46.5558	73.8636	7	31	7	1	88	10.018	5.06	High	High	High		0.733	0.862	115.6	84.7	99.7	8	8	8	315.228	0	71.6032	7
FALSE	High	Master Protein	A6BBR3	Azurin (Fragment) OS=Vibrio parahaemolyticus serotype O3:K6 (strain AQ3810) GN=azu PE=4 SV=1	0	46.44	42.6357	4	26	4	1	129	13.762	5.17	High	High	High		0.468	0.677	139.9	65.5	94.6	4	4	4	18.307	0	95.3658	4
FALSE	High	Master Protein	A6B8Y1	Alanine racemase OS=Vibrio parahaemolyticus serotype O3:K6 (strain AQ3810) GN=alr PE=3 SV=1	0	46.3929	29.6399	9	15	9	1	361	39.44	6.38	High	High	High		1.102	1.04	95.5	105.2	99.3	9	9	9	3.16	0	49.0513	9
FALSE	High	Master Protein	A6BA42	HTH-type protein SlmA (Fragment) OS=Vibrio parahaemolyticus serotype O3:K6 (strain AQ3810) GN=A79_2218 PE=4 SV=1	0	46.2565	25.4545	4	9	4	1	165	19.12	9.45	High	High	High		0.909	0.96	104.6	95.1	100.4	4	4	4	3.329	0	33.1944	4
FALSE	High	Master Protein	A6B017	Flagellar M-ring protein OS=Vibrio parahaemolyticus serotype O3:K6 (strain AQ3810) GN=fliF PE=3 SV=1	0	46.2326	16.2069	7	11	7	1	580	63.774	4.74	High	High	High		0.632	0.931	117	74	109	7	7	7	0.995	0	35.5077	7
FALSE	High	Master Protein	A6BBS4	Malonyl CoA-acyl carrier protein transacylase (Fragment) OS=Vibrio parahaemolyticus serotype O3:K6 (strain AQ3810) GN=A79_0817 PE=4 SV=1	0	46.229	66.3043	5	15	5	1	92	9.908	4.88	High	High	High		0.55	1.011	117.1	64.4	118.5	5	5	5	62.096	0	43.4012	5
FALSE	High	Master Protein	A6AZQ3	Acetyltransferase, gnat family OS=Vibrio parahaemolyticus serotype O3:K6 (strain AQ3810) GN=A79_3127 PE=4 SV=1	0	46.2194	42.6036	6	11	6	1	169	19.453	6.04	High	High	High		0.98	0.83	106.8	104.7	88.6	7	7	7	7.111	0	38.0419	6
FALSE	High	Master Protein	A6AZT5	Cation efflux system OS=Vibrio parahaemolyticus serotype O3:K6 (strain AQ3810) GN=A79_3159 PE=3 SV=1	0	46.1403	12.1597	12	18	12	1	1102	120.788	5.07	High	High	High		1.302	0.984	91.3	118.8	89.9	12	12	12	1.085	0	39.2632	12
FALSE	High	Master Protein	A6BB72	Nicotinate-nucleotide pyrophosphorylase (Fragment) OS=Vibrio parahaemolyticus serotype O3:K6 (strain AQ3810) GN=A79_3345 PE=4 SV=1	0	46.0618	32.3276	6	16	5	1	232	25.496	7.47	High	High	High		0.872	0.993	104.7	91.3	104	6	6	6	2.384	1	58.2005	6
FALSE	High	Master Protein	A6B598	D-aminoacyl-tRNA deacylase OS=Vibrio parahaemolyticus serotype O3:K6 (strain AQ3810) GN=dtd PE=3 SV=1	0	45.9255	56.9444	7	17	7	1	144	16.024	5.1	High	High	High		1.109	0.989	96.8	107.4	95.8	8	8	8	9	0	54.249	7
FALSE	High	Master Protein	A6AZY0	Long-chain fatty acid transport protein OS=Vibrio parahaemolyticus serotype O3:K6 (strain AQ3810) GN=A79_2621 PE=4 SV=1	0	45.9113	14.6635	5	18	5	1	416	45.73	4.97	High	High	High		0.71	0.864	116.6	82.8	100.7	5	5	5	1.228	0	68.0564	5
FALSE	High	Master Protein	A6B114	Xanthine/uracil/vitamin C permease OS=Vibrio parahaemolyticus serotype O3:K6 (strain AQ3810) GN=A79_6078 PE=4 SV=1	0	45.8875	8.15534	4	14	4	1	515	55.16	6.01	High	High	High		1.394	1.494	77.2	107.6	115.3	5	5	5	2.594	0	45.9119	4
FALSE	High	Master Protein	A6B9J0	30S ribosomal protein S17 OS=Vibrio parahaemolyticus serotype O3:K6 (strain AQ3810) GN=rpsQ PE=3 SV=1	0	45.8626	47.619	3	13	3	1	84	9.567	9.51	High	High	High		0.335	1.034	126.7	42.4	130.9	3	3	3	55.234	0	60.0434	3
FALSE	High	Master Protein	A6B6R6	General L-amino acid transport ATP-binding protein AapP OS=Vibrio parahaemolyticus serotype O3:K6 (strain AQ3810) GN=A79_3359 PE=4 SV=1	0	45.84	48.5944	8	14	8	1	249	28.332	5.5	High	High	High		1.325	0.998	90.3	119.6	90.1	9	9	9	4.412	0	35.132	8
FALSE	High	Master Protein	A6B1K8	6-phospho-beta-glucosidase BglB OS=Vibrio parahaemolyticus serotype O3:K6 (strain AQ3810) GN=A79_5988 PE=3 SV=1	0	45.8282	16.1987	8	16	8	1	463	52.96	5.1	High	High	High		0.835	1.008	105.5	88.1	106.4	10	10	10	2.455	0	41.9738	8
FALSE	High	Master Protein	A6AX87	CpsD OS=Vibrio parahaemolyticus serotype O3:K6 (strain AQ3810) GN=A79_0527 PE=4 SV=1	0	45.7577	15.3631	9	11	9	1	716	80.84	8.95	High	High	High		0.706	1.087	107.4	75.8	116.8	9	9	9	0.632	0	38.1481	9
FALSE	High	Master Protein	A6B8E8	Amidohydrolase 3 OS=Vibrio parahaemolyticus serotype O3:K6 (strain AQ3810) GN=A79_2462 PE=4 SV=1	0	45.6211	26.4271	9	19	3	1	473	52.289	5.39	High	High	High		1.279	1.15	87.5	111.9	100.6	3	3	3	2.03	0	44.531	9
FALSE	High	Master Protein	A6B848	AsmA family (Fragment) OS=Vibrio parahaemolyticus serotype O3:K6 (strain AQ3810) GN=A79_0758 PE=4 SV=1	0	45.59	15.8491	6	11	4	1	530	59.98	5.2	High	High	High		1.088	0.95	98.8	107.4	93.8	6	6	6	1.683	2	37.2125	6
FALSE	High	Master Protein	A6B3Z9	N-acetylglucosamine-6-phosphate deacetylase OS=Vibrio parahaemolyticus serotype O3:K6 (strain AQ3810) GN=nagA PE=3 SV=1	0	45.5738	24.0741	6	14	6	1	378	40.726	5.53	High	High	High		0.814	0.965	107.9	87.9	104.2	8	8	8	2.652	0	51.7297	6
FALSE	High	Master Protein	A6B423	Outer membrane porin, OprD family OS=Vibrio parahaemolyticus serotype O3:K6 (strain AQ3810) GN=A79_2305 PE=4 SV=1	0	45.5027	18.5501	9	22	9	1	469	51.747	4.82	High	High	High		1.529	0.842	89	136.1	74.9	9	9	9	5.813	0	54.9408	9
FALSE	High	Master Protein	A6B7F3	Phosphoadenosine phosphosulfate reductase OS=Vibrio parahaemolyticus serotype O3:K6 (strain AQ3810) GN=cysH PE=3 SV=1	0	45.4957	26.6667	6	13	6	1	255	29.329	5.22	High	High	High		0.853	1.029	104.1	88.8	107.1	6	6	6	3.125	0	45.2429	6
FALSE	High	Master Protein	A6B5C4	Protein mlc OS=Vibrio parahaemolyticus serotype O3:K6 (strain AQ3810) GN=A79_1709 PE=4 SV=1	0	45.4198	25.679	9	13	9	1	405	44.598	5.33	High	High	High		1.088	0.948	98.8	107.5	93.7	9	9	9	1.848	0	45.5532	9
FALSE	High	Master Protein	A6B946	Glutamate decarboxylase OS=Vibrio parahaemolyticus serotype O3:K6 (strain AQ3810) GN=A79_5388 PE=3 SV=1	0	45.4196	35.8209	7	23	1	1	201	23.007	6.95	High	High	High		1.015	0.905	102.7	104.3	93	2	2	2	5.31	1	45.0356	7
FALSE	High	Master Protein	A6B298	Sensor histidine kinase OS=Vibrio parahaemolyticus serotype O3:K6 (strain AQ3810) GN=A79_5110 PE=4 SV=1	0	45.4099	16.053	9	11	9	1	679	77.351	6.39	High	High	High		1.012	0.986	100.1	101.2	98.7	9	9	9	0.753	0	38.4121	9
FALSE	High	Master Protein	A6B026	Flagellin OS=Vibrio parahaemolyticus serotype O3:K6 (strain AQ3810) GN=A79_2667 PE=3 SV=1	0	45.3767	24.4681	6	8	4	1	376	39.825	4.98	High	High	High		0.683	1.121	107	73.1	119.9	4	4	4	0.817	0	38.8166	6
FALSE	High	Master Protein	A6B5Q4	Protein ApaG OS=Vibrio parahaemolyticus serotype O3:K6 (strain AQ3810) GN=apaG PE=3 SV=1	0	45.3765	39.6825	5	11	5	1	126	14.368	5	High	High	High		0.918	1.039	101.4	93.1	105.4	6	6	6	6.743	0	36.8796	5
FALSE	High	Master Protein	A6B568	Riboflavin biosynthesis protein OS=Vibrio parahaemolyticus serotype O3:K6 (strain AQ3810) GN=ribF PE=3 SV=1	0	45.2489	27.0096	7	10	7	1	311	34.909	8.53	High	High	High		1.116	1.031	95.3	106.4	98.3	7	7	7	1.637	0	39.6327	7
FALSE	High	Master Protein	A6B4Z4	Dephospho-CoA kinase OS=Vibrio parahaemolyticus serotype O3:K6 (strain AQ3810) GN=coaE PE=3 SV=1	0	45.186	46.0784	6	10	6	1	204	22.84	5.22	High	High	High		1.156	1.034	94.1	108.7	97.2	6	6	6	3.642	0	43.3399	6
FALSE	High	Master Protein	A6B2X3	Acetyltransferase OS=Vibrio parahaemolyticus serotype O3:K6 (strain AQ3810) GN=A79_5015 PE=4 SV=1	0	44.9884	25.1572	5	9	5	1	318	34.527	4.87	High	High	High		0.783	1.059	105.5	82.6	111.8	6	6	6	1.955	0	39.9634	5
FALSE	High	Master Protein	A6B4U0	Cadmium-translocating P-type ATPase OS=Vibrio parahaemolyticus serotype O3:K6 (strain AQ3810) GN=cadA PE=3 SV=1	0	44.9266	17.4479	9	13	9	1	768	81.279	5.29	High	High	High		0.811	1.191	99.9	81	119	9	9	9	0.983	0	41.6874	9
FALSE	High	Master Protein	A6B6Q7	Uncharacterized protein OS=Vibrio parahaemolyticus serotype O3:K6 (strain AQ3810) GN=A79_3350 PE=4 SV=1	0	44.8845	22.2222	11	19	11	1	450	52.777	9.54	High	High	High		1.12	0.976	96.9	108.5	94.5	11	11	11	2.29	0	51.6458	11
FALSE	High	Master Protein	A6B247	SsrA-binding protein OS=Vibrio parahaemolyticus serotype O3:K6 (strain AQ3810) GN=smpB PE=3 SV=1	0	44.7756	31.677	5	15	5	1	161	18.388	10.26	High	High	High		0.954	0.972	102.5	97.8	99.7	5	5	5	30.623	0	49.7479	5
FALSE	High	Master Protein	A6B760	Lipopolysaccharide heptosyltransferase II OS=Vibrio parahaemolyticus serotype O3:K6 (strain AQ3810) GN=rfaF PE=4 SV=1	0	44.7477	26.7045	8	15	8	1	352	39.289	7.83	High	High	High		0.937	1.002	102.1	95.6	102.3	8	8	8	2.008	0	54.2928	8
FALSE	High	Master Protein	A6AZ13	NAD dependent epimerase/dehydratase family OS=Vibrio parahaemolyticus serotype O3:K6 (strain AQ3810) GN=A79_6244 PE=4 SV=1	0	44.6925	32.0346	8	20	8	1	231	25.793	8.24	High	High	High		1.506	1.025	85	127.9	87.1	8	8	8	5.31	0	60.8238	8
FALSE	High	Master Protein	A6B481	Alkyl hydroperoxide reductase, F subunit OS=Vibrio parahaemolyticus serotype O3:K6 (strain AQ3810) GN=ahpF PE=3 SV=1	0	44.6877	21.0728	10	12	10	1	522	56.173	5.06	High	High	High		0.573	0.7	132	75.6	92.4	10	10	10	1.207	0	34.0748	10
FALSE	High	Master Protein	A6BAZ1	GTP cyclohydrolase II (Fragment) OS=Vibrio parahaemolyticus serotype O3:K6 (strain AQ3810) GN=A79_4580 PE=3 SV=1	0	44.6468	26.7062	7	14	7	1	337	38.199	6.92	High	High	High		0.772	0.855	114.2	88.2	97.6	8	8	8	1.721	0	46.7966	7
FALSE	High	Master Protein	A6AZV1	Molybdenum import ATP-binding protein ModC OS=Vibrio parahaemolyticus serotype O3:K6 (strain AQ3810) GN=modC PE=3 SV=1	0	44.6449	26.9022	8	12	8	1	368	40.887	6.67	High	High	High		1.13	0.978	96.5	109.1	94.4	8	8	8	1.721	0	43.9884	8
FALSE	High	Master Protein	A6B509	Quinone oxidoreductase OS=Vibrio parahaemolyticus serotype O3:K6 (strain AQ3810) GN=A79_3789 PE=4 SV=1	0	44.6138	35.1266	8	18	8	1	316	33.247	5.25	High	High	High		1.133	1.014	95.3	108	96.7	8	8	8	4.179	0	57.4015	8
FALSE	High	Master Protein	A6B9F2	Chemotaxis protein PomA OS=Vibrio parahaemolyticus serotype O3:K6 (strain AQ3810) GN=A79_1978 PE=4 SV=1	0	44.4718	43.3155	7	13	7	1	187	20.426	4.82	High	High	High		1.172	0.914	97.2	113.9	88.9	7	7	7	3.924	0	49.1649	7
FALSE	High	Master Protein	A6AYW4	Zn-finger domain associated with topoisomerase type I OS=Vibrio parahaemolyticus serotype O3:K6 (strain AQ3810) GN=A79_6194 PE=4 SV=1	0	44.4629	36.0731	7	15	7	1	219	25.123	9.52	High	High	High		1.114	1.152	91.9	102.3	105.8	7	7	7	4.412	0	43.9994	7
FALSE	High	Master Protein	A6B275	Xanthine phosphoribosyltransferase OS=Vibrio parahaemolyticus serotype O3:K6 (strain AQ3810) GN=gpt PE=3 SV=1	0	44.4369	29.2208	3	16	3	1	154	17.559	5.25	High	High	High		0.942	1.109	98.3	92.6	109.1	4	4	4	4.995	0	74.3121	3
FALSE	High	Master Protein	A6B7V2	WbnF (Fragment) OS=Vibrio parahaemolyticus serotype O3:K6 (strain AQ3810) GN=A79_2272 PE=4 SV=1	0	44.3957	21.6667	5	16	5	1	300	34.964	8.75	High	High	High		1.449	0.948	88.3	128	83.7	5	5	5	3.642	0	51.1686	5
FALSE	High	Master Protein	A6B753	Glyoxylase II family protein OS=Vibrio parahaemolyticus serotype O3:K6 (strain AQ3810) GN=A79_2088 PE=4 SV=1	0	44.3258	39.9083	6	17	6	1	218	23.825	5.22	High	High	High		0.949	1.017	101.1	96	102.9	6	6	6	5.813	0	57.6045	6
FALSE	High	Master Protein	A6B076	Transcriptional regulator OS=Vibrio parahaemolyticus serotype O3:K6 (strain AQ3810) GN=A79_2816 PE=4 SV=1	0	44.2608	43.5897	9	15	9	1	234	27.05	7.49	High	High	High		0.939	1.012	101.7	95.5	102.9	9	9	9	5.105	0	47.3431	9
FALSE	High	Master Protein	A6B016	Flagellar motor switch protein FliG OS=Vibrio parahaemolyticus serotype O3:K6 (strain AQ3810) GN=fliG PE=3 SV=1	0	44.2559	30.7692	9	16	9	1	351	38.641	4.61	High	High	High		0.784	1.024	106.8	83.7	109.4	9	9	9	2.675	0	42.2786	9
FALSE	High	Master Protein	A6BC07	Sensor histidine kinase (Fragment) OS=Vibrio parahaemolyticus serotype O3:K6 (strain AQ3810) GN=A79_4641 PE=4 SV=1	0	44.2439	50.5747	7	13	7	1	174	19.675	4.73	High	High	High		1.316	0.905	93.1	122.6	84.3	7	7	7	3.924	0	41.0747	7
FALSE	High	Master Protein	A6B447	Iron binding protein FbpA (Fragment) OS=Vibrio parahaemolyticus serotype O3:K6 (strain AQ3810) GN=A79_5371 PE=4 SV=1	0	44.2143	30.6548	7	11	7	1	336	37.542	5.81	High	High	High		0.568	1.246	106.6	60.5	132.8	7	7	7	1.637	0	38.3618	7
FALSE	High	Master Protein	A6B2Q5	Peptide methionine sulfoxide reductase MsrA OS=Vibrio parahaemolyticus serotype O3:K6 (strain AQ3810) GN=msrA PE=3 SV=1	0	44.1949	26.8868	5	14	5	1	212	23.63	5.06	High	High	High		0.888	1.011	103.5	91.9	104.6	5	5	5	3.642	0	48.2925	5
FALSE	High	Master Protein	A6B4G6	3-phosphoshikimate 1-carboxyvinyltransferase OS=Vibrio parahaemolyticus serotype O3:K6 (strain AQ3810) GN=aroA PE=3 SV=1	0	43.996	27.6995	9	13	9	1	426	46.066	5.27	High	High	High		0.954	1.057	99.6	95	105.3	10	10	10	2.34	0	45.7773	9
FALSE	High	Master Protein	A6B9U5	Transcriptional activator protein NhaR OS=Vibrio parahaemolyticus serotype O3:K6 (strain AQ3810) GN=A79_2925 PE=4 SV=1	0	43.985	45.9459	9	12	9	1	296	33.927	5.85	High	High	High		1.017	0.976	100.2	101.9	97.8	9	9	9	3.084	0	34.1345	9
FALSE	High	Master Protein	A6B387	D-alanine--D-alanine ligase OS=Vibrio parahaemolyticus serotype O3:K6 (strain AQ3810) GN=ddl PE=3 SV=1	0	43.9005	23.4043	5	14	5	1	329	36.933	5.17	High	High	High		1.075	1.084	95	102.1	102.9	5	5	5	3.394	0	49.2755	5
FALSE	High	Master Protein	A6B900	Ribonuclease D (Fragment) OS=Vibrio parahaemolyticus serotype O3:K6 (strain AQ3810) GN=rnd PE=3 SV=1	0	43.8673	28.4457	10	13	10	1	341	38.647	6.14	High	High	High		0.769	0.99	108.7	83.7	107.6	10	10	10	2.981	0	36.8986	10
FALSE	High	Master Protein	A6B366	Phosphate regulon transcriptional regulatory protein PhoB OS=Vibrio parahaemolyticus serotype O3:K6 (strain AQ3810) GN=phoB PE=4 SV=1	0	43.8556	41.4847	7	14	7	1	229	26.105	6.1	High	High	High		0.92	1.255	94.5	86.9	118.6	7	7	7	3.642	0	44.4698	7
FALSE	High	Master Protein	A6B6X6	UPF0145 protein A79_1219 OS=Vibrio parahaemolyticus serotype O3:K6 (strain AQ3810) GN=A79_1219 PE=3 SV=1	0	43.8169	76.1905	8	14	8	1	105	11.208	5.45	High	High	High		1.023	0.95	100.9	103.2	95.9	8	8	8	14.849	0	39.2174	8
FALSE	High	Master Protein	A6B9C7	Ferroxidase OS=Vibrio parahaemolyticus serotype O3:K6 (strain AQ3810) GN=bfr PE=3 SV=1	0	43.8067	35.443	6	16	6	1	158	18.475	4.53	High	High	High		1.907	1.139	74.1	141.4	84.5	6	6	6	9	0	48.4634	6
FALSE	High	Master Protein	A6B5D3	DNA polymerase III subunit delta OS=Vibrio parahaemolyticus serotype O3:K6 (strain AQ3810) GN=A79_1718 PE=4 SV=1	0	43.619	26.5625	6	10	6	1	320	35.799	5.5	High	High	High		1.012	1.024	98.8	100	101.2	6	6	6	1.404	0	35.7605	6
FALSE	High	Master Protein	A6B027	Flagellin OS=Vibrio parahaemolyticus serotype O3:K6 (strain AQ3810) GN=A79_2668 PE=3 SV=1	0	43.5813	26.4484	7	9	5	1	397	42.285	5.11	High	High	High		0.726	1.266	100.3	72.8	126.9	7	7	7	0.817	2	38.043	7
FALSE	High	Master Protein	A6B3G4	Oligopeptide ABC transporter, permease protein OS=Vibrio parahaemolyticus serotype O3:K6 (strain AQ3810) GN=A79_1186 PE=3 SV=1	0	43.565	18.6667	8	23	8	1	300	33.36	6.55	High	High	High		0.934	0.958	103.7	96.9	99.4	8	8	8	14.849	0	66.9655	8
FALSE	High	Master Protein	A6B1T2	Uncharacterized protein OS=Vibrio parahaemolyticus serotype O3:K6 (strain AQ3810) GN=A79_5306 PE=4 SV=1	0	43.5291	46.4968	5	17	5	1	157	17.471	6.65	High	High	High		0.347	0.556	157.6	54.7	87.7	5	5	5	18.307	0	51.0597	5
FALSE	High	Master Protein	A6B354	Transcriptional regulator, LysR family OS=Vibrio parahaemolyticus serotype O3:K6 (strain AQ3810) GN=A79_0781 PE=4 SV=1	0	43.4995	30.2326	7	9	7	1	301	33.744	5.8	High	High	High		0.974	0.986	101.4	98.7	99.9	7	7	7	2.652	0	33.704	7
FALSE	High	Master Protein	A6B8S2	ABC transporter, ATP-binding protein (Fragment) OS=Vibrio parahaemolyticus serotype O3:K6 (strain AQ3810) GN=A79_4942 PE=4 SV=1	0	43.4374	18.2186	7	10	4	1	494	55.538	5.83	High	High	High		0.851	0.98	106	90.2	103.8	5	5	5	1.276	0	28.6217	7
FALSE	High	Master Protein	A6B4F6	Chaperone protein TorD OS=Vibrio parahaemolyticus serotype O3:K6 (strain AQ3810) GN=torD PE=3 SV=1	0	43.3731	24.6512	4	9	4	1	215	24.735	4.55	High	High	High		1.026	1.105	95.8	98.3	105.8	4	4	4	2.831	0	33.7191	4
FALSE	High	Master Protein	A6B6Y3	Sporulation-control protein OS=Vibrio parahaemolyticus serotype O3:K6 (strain AQ3810) GN=A79_1225 PE=4 SV=1	0	43.3236	38.8664	7	12	7	1	247	27.272	5.01	High	High	High		0.762	1.153	102.9	78.4	118.7	7	7	7	2.594	0	38.7278	7
FALSE	High	Master Protein	A6B7M8	C4-dicarboxylate transport sensor protein OS=Vibrio parahaemolyticus serotype O3:K6 (strain AQ3810) GN=A79_5224 PE=4 SV=1	0	43.3187	25.3769	10	16	10	1	398	44.414	7.11	High	High	High		1.239	0.919	95	117.7	87.3	10	10	10	1.683	0	36.6354	10
FALSE	High	Master Protein	A6B9I5	30S ribosomal protein S19 OS=Vibrio parahaemolyticus serotype O3:K6 (strain AQ3810) GN=rpsS PE=3 SV=1	0	43.2777	36.9565	4	22	4	1	92	10.421	10.52	High	High	High		0.191	1.256	122.6	23.4	154	4	4	4	20.544	0	78.1514	4
FALSE	High	Master Protein	A6B724	Oxygen-insensitive NAD(P)H nitroreductase OS=Vibrio parahaemolyticus serotype O3:K6 (strain AQ3810) GN=A79_5692 PE=4 SV=1	0	43.2723	38.2488	7	12	7	1	217	24.475	5.68	High	High	High		0.6	1.079	112	67.2	120.8	8	8	8	3.924	0	37.8091	7
FALSE	High	Master Protein	A6B474	Methyl-accepting chemotaxis protein OS=Vibrio parahaemolyticus serotype O3:K6 (strain AQ3810) GN=A79_4978 PE=4 SV=1	0	43.2674	26.5928	9	24	8	1	361	39.796	5.58	High	High	High		0.688	0.941	114.2	78.5	107.4	8	8	8	2.008	0	60.0426	9
FALSE	High	Master Protein	A6BA53	Flavodoxin reductase family 1 protein (Fragment) OS=Vibrio parahaemolyticus serotype O3:K6 (strain AQ3810) GN=A79_1893 PE=4 SV=1	0	43.0616	28.8973	6	9	6	1	263	28.845	6.02	High	High	High		0.901	0.809	110.7	99.7	89.6	6	6	6	2.652	0	33.8246	6
FALSE	High	Master Protein	A6AZK8	Flp pilus assembly protein TadA OS=Vibrio parahaemolyticus serotype O3:K6 (strain AQ3810) GN=A79_4318 PE=4 SV=1	0	43.0572	16.7702	8	12	8	1	483	53.9	5.62	High	High	High		1.118	1.15	91.8	102.6	105.6	8	8	8	1.424	0	35.4678	8
FALSE	High	Master Protein	A6B388	Minor tail protein OS=Vibrio parahaemolyticus serotype O3:K6 (strain AQ3810) GN=A79_0237 PE=4 SV=1	0	42.9946	53.4884	6	14	6	1	129	14.217	9.6	High	High	High		0.771	0.92	111.5	86	102.5	6	6	6	11.915	0	45.6855	6
FALSE	High	Master Protein	A6B839	Pyruvate dehydrogenase complex repressor OS=Vibrio parahaemolyticus serotype O3:K6 (strain AQ3810) GN=A79_4587 PE=4 SV=1	0	42.9673	39.6078	8	15	8	1	255	29.117	6.67	High	High	High		0.976	1.026	99.9	97.6	102.5	8	8	8	4.179	0	48.933	8
FALSE	High	Master Protein	A6B7H5	ADP-heptose--lipooligosaccharide heptosyltransferase I OS=Vibrio parahaemolyticus serotype O3:K6 (strain AQ3810) GN=A79_5534 PE=4 SV=1	0	42.9509	37.037	9	12	9	1	351	38.893	6.8	High	High	High		1.114	0.979	97	108.1	95	10	10	10	3.217	0	36.6521	9
FALSE	High	Master Protein	A6AZJ4	Galactokinase OS=Vibrio parahaemolyticus serotype O3:K6 (strain AQ3810) GN=galK PE=3 SV=1	0	42.9034	20.4663	7	10	7	1	386	42.088	4.83	High	High	High		0.776	0.985	108.6	84.3	107	7	7	7	1.154	0	35.1734	7
FALSE	High	Master Protein	A6B270	Succinylglutamate desuccinylase/aspartoacylase family protein OS=Vibrio parahaemolyticus serotype O3:K6 (strain AQ3810) GN=A79_2572 PE=4 SV=1	0	42.8391	24.1573	8	18	8	1	356	39.042	6.62	High	High	High		1.047	1.01	98.1	102.7	99.1	8	8	8	3.16	0	48.4422	8
FALSE	High	Master Protein	A6B7S6	Phosphate acyltransferase (Fragment) OS=Vibrio parahaemolyticus serotype O3:K6 (strain AQ3810) GN=plsX PE=3 SV=1	0	42.7726	18.2482	4	9	3	1	274	29.292	6.21	High	High	High		1.024	0.886	103.1	105.5	91.4	4	4	4	2.728	1	31.2925	4
FALSE	High	Master Protein	A6B299	ABC transporter, ATP-binding protein OS=Vibrio parahaemolyticus serotype O3:K6 (strain AQ3810) GN=A79_5111 PE=4 SV=1	0	42.7219	23.0189	9	15	9	1	530	59.797	4.98	High	High	High		0.728	1.078	106.9	77.9	115.3	9	9	9	1.395	0	40.5496	9
FALSE	High	Master Protein	A6B010	Flagellar motor switch protein FliM OS=Vibrio parahaemolyticus serotype O3:K6 (strain AQ3810) GN=fliM PE=3 SV=1	0	42.6905	34.1954	9	19	9	1	348	39.778	4.63	High	High	High		0.942	0.998	102	96.1	101.9	9	9	9	3.281	0	49.9155	9
FALSE	High	Master Protein	A6B2V0	Phenylalanine and histidine ammonia-lyase OS=Vibrio parahaemolyticus serotype O3:K6 (strain AQ3810) GN=A79_2338 PE=4 SV=1	0	42.6795	19.1489	7	10	7	1	517	57.178	5.91	High	High	High		0.792	0.988	107.9	85.5	106.6	7	7	7	0.931	0	33.8149	7
FALSE	High	Master Protein	A6AYE3	Aldehyde dehydrogenase OS=Vibrio parahaemolyticus serotype O3:K6 (strain AQ3810) GN=A79_1538 PE=3 SV=1	0	42.6488	22.9787	7	8	7	1	470	52.354	8.32	High	High	High		0.959	0.955	103	98.7	98.4	7	7	7	1.089	0	32.6799	7
FALSE	High	Master Protein	A6B1X9	Khg/kdpg aldolase OS=Vibrio parahaemolyticus serotype O3:K6 (strain AQ3810) GN=A79_5845 PE=4 SV=1	0	42.6258	53.1401	7	14	7	1	207	22.124	4.79	High	High	High		0.805	1.114	102.8	82.7	114.5	8	8	8	11.328	0	41.5538	7
FALSE	High	Master Protein	A6B5Y1	Peptidoglycan synthetase FtsI OS=Vibrio parahaemolyticus serotype O3:K6 (strain AQ3810) GN=A79_1319 PE=4 SV=1	0	42.5961	12.0603	7	15	7	1	597	65.459	9.66	High	High	High		1.198	1.014	93.4	111.9	94.7	7	7	7	0.751	0	51.8536	7
FALSE	High	Master Protein	A6B565	Peptidyl-prolyl cis-trans isomerase OS=Vibrio parahaemolyticus serotype O3:K6 (strain AQ3810) GN=A79_2108 PE=4 SV=1	0	42.5024	26.5432	2	7	2	1	162	17.564	4.81	High	High	High		0.657	0.952	115	75.6	109.4	3	3	3	30.623	0	35.7447	2
FALSE	High	Master Protein	A6B597	Acetyltransferase OS=Vibrio parahaemolyticus serotype O3:K6 (strain AQ3810) GN=A79_3243 PE=4 SV=1	0	42.3335	28.5246	7	11	7	1	305	34.77	8.82	High	High	High		0.876	0.923	107.2	93.9	98.9	7	7	7	2.162	0	40.2928	7
FALSE	High	Master Protein	A6B7G1	Zinc uptake regulation protein OS=Vibrio parahaemolyticus serotype O3:K6 (strain AQ3810) GN=A79_5550 PE=3 SV=1	0	42.323	60.3896	6	13	6	1	154	17.526	5.36	High	High	High		1.17	1.036	93.6	109.5	96.9	7	7	7	16.783	0	44.1148	6
FALSE	High	Master Protein	A6B7Q5	Permease YjgP/YjgQ family protein OS=Vibrio parahaemolyticus serotype O3:K6 (strain AQ3810) GN=A79_5579 PE=4 SV=1	0	42.2932	21.6292	8	17	8	1	356	39.494	5.58	High	High	High		1.142	0.989	95.8	109.4	94.8	8	8	8	3.281	0	40.8332	8
FALSE	High	Master Protein	A6AZE8	Na(+)-translocating NADH-quinone reductase subunit B OS=Vibrio parahaemolyticus serotype O3:K6 (strain AQ3810) GN=nqrB PE=3 SV=1	0	42.1859	9.42029	5	20	5	1	414	45.305	8.37	High	High	High		1.072	1.136	93.5	100.3	106.2	5	5	5	9	0	62.8114	5
FALSE	High	Master Protein	A6B9T6	Oligoribonuclease OS=Vibrio parahaemolyticus serotype O3:K6 (strain AQ3810) GN=orn PE=3 SV=1	0	42.121	49.1713	5	9	5	1	181	20.929	5.02	High	High	High		0.731	1.087	106.5	77.8	115.8	5	5	5	4.012	0	41.0393	5
FALSE	High	Master Protein	A6B7Z0	UPF0263 protein A79_3823 OS=Vibrio parahaemolyticus serotype O3:K6 (strain AQ3810) GN=A79_3823 PE=3 SV=1	0	42.0425	50	3	6	3	1	106	12.246	4.22	High	High	High		0.89	1.085	100.8	89.7	109.4	3	3	3	9	0	31.7895	3
FALSE	High	Master Protein	A6B089	L-serine ammonia-lyase OS=Vibrio parahaemolyticus serotype O3:K6 (strain AQ3810) GN=sdaA PE=4 SV=1	0	41.9812	15.9794	8	23	8	1	388	41.586	5.14	High	High	High		1.36	1.011	89	121	90	9	9	9	7.577	0	61.856	8
FALSE	High	Master Protein	A6AY64	7-carboxy-7-deazaguanine synthase OS=Vibrio parahaemolyticus serotype O3:K6 (strain AQ3810) GN=queE PE=3 SV=1	0	41.8904	31.8584	6	9	6	1	226	25.187	5.34	High	High	High		0.83	0.999	106	88	105.9	6	6	6	2.415	0	31.2343	6
FALSE	High	Master Protein	A6B359	Phosphate import ATP-binding protein PstB OS=Vibrio parahaemolyticus serotype O3:K6 (strain AQ3810) GN=pstB PE=3 SV=1	0	41.8594	34.1912	8	13	8	1	272	30.496	6.95	High	High	High		1.038	0.978	99.5	103.2	97.3	9	9	9	6.017	0	39.7339	8
FALSE	High	Master Protein	A6B4V7	Acriflavin resistance protein OS=Vibrio parahaemolyticus serotype O3:K6 (strain AQ3810) GN=A79_1386 PE=3 SV=1	0	41.8029	10.5111	9	10	9	1	1037	112.696	4.86	High	High	High		1.138	0.948	97.2	110.6	92.1	9	9	9	0.49	0	30.0929	9
FALSE	High	Master Protein	A6B1D9	Uncharacterized protein OS=Vibrio parahaemolyticus serotype O3:K6 (strain AQ3810) GN=A79_1429 PE=4 SV=1	0	41.5837	15.0776	7	14	7	1	451	51.083	5.38	High	High	High		1.147	1.171	90.4	103.7	105.9	7	7	7	3.084	0	40.6512	7
FALSE	High	Master Protein	A6B2T5	RhlE OS=Vibrio parahaemolyticus serotype O3:K6 (strain AQ3810) GN=A79_2323 PE=3 SV=1	0	41.5721	27.2506	9	9	9	1	411	45.593	8.29	High	High	High		0.832	0.988	106.4	88.5	105.1	9	9	9	1.096	0	29.8886	9
FALSE	High	Master Protein	A6AY71	Formate--tetrahydrofolate ligase OS=Vibrio parahaemolyticus serotype O3:K6 (strain AQ3810) GN=fhs PE=3 SV=1	0	41.5385	16.5529	7	8	7	1	586	62.672	6.35	High	High	High		0.839	0.982	106.3	89.2	104.4	7	7	7	0.748	0	31.0744	7
FALSE	High	Master Protein	A6B2J6	Lipid A biosynthesis lauroyltransferase OS=Vibrio parahaemolyticus serotype O3:K6 (strain AQ3810) GN=lpxL PE=3 SV=1	0	41.5104	28.481	9	15	9	1	316	36.328	9.22	High	High	High		1.207	0.996	93.7	113	93.3	10	10	10	2.981	0	39.9501	9
FALSE	High	Master Protein	A6BAE7	2-methylthioadenine synthetase (Fragment) OS=Vibrio parahaemolyticus serotype O3:K6 (strain AQ3810) GN=A79_4224 PE=4 SV=1	0	41.3903	19.9541	9	13	2	1	436	49.348	5.49	High	High	High		0.743	1.053	107.3	79.7	113	9	9	9	1.512	7	31.8714	9
FALSE	High	Master Protein	A6B834	Spermidine/putrescine ABC transporter membrane component OS=Vibrio parahaemolyticus serotype O3:K6 (strain AQ3810) GN=A79_3560 PE=3 SV=1	0	41.3822	22.3776	7	18	7	1	286	31.976	9.22	High	High	High		1.319	0.94	92.1	121.4	86.5	7	7	7	3.642	0	55.2124	7
FALSE	High	Master Protein	A6B1K6	Uncharacterized protein OS=Vibrio parahaemolyticus serotype O3:K6 (strain AQ3810) GN=A79_5986 PE=4 SV=1	0	41.3298	29.4643	3	20	3	1	112	12.681	4.65	High	High	High		1.089	0.915	99.9	108.8	91.3	5	5	5	38.811	0	70.5807	3
FALSE	High	Master Protein	A6B9B8	30S ribosomal protein S11 OS=Vibrio parahaemolyticus serotype O3:K6 (strain AQ3810) GN=rpsK PE=3 SV=1	0	41.0542	27.907	4	18	4	1	129	13.881	11.33	High	High	High		0.422	0.835	132.9	56.1	111	4	4	4	9	0	81.4613	4
FALSE	High	Master Protein	A6B6N2	Toluene tolerance protein Ttg2A OS=Vibrio parahaemolyticus serotype O3:K6 (strain AQ3810) GN=A79_0018 PE=4 SV=1	0	41.0257	37.0787	8	15	8	1	267	29.293	4.98	High	High	High		0.851	1.071	102.6	87.4	110	8	8	8	2.981	0	51.2381	8
FALSE	High	Master Protein	A6B2Y3	Elongation factor P OS=Vibrio parahaemolyticus serotype O3:K6 (strain AQ3810) GN=efp PE=3 SV=1	0	40.9683	23.9362	4	26	4	1	188	20.571	4.94	High	High	High		1.02	0.839	104.9	107.1	88	4	4	4	9	0	90.6483	4
FALSE	High	Master Protein	A6B6Y5	Imidazolonepropionase OS=Vibrio parahaemolyticus serotype O3:K6 (strain AQ3810) GN=hutI PE=3 SV=1	0	40.9563	22.069	8	15	8	1	435	47.55	5.57	High	High	High		0.698	0.997	111.3	77.7	111	8	8	8	0.931	0	47.7481	8
FALSE	High	Master Protein	A6B7W5	tRNA pseudouridine synthase A OS=Vibrio parahaemolyticus serotype O3:K6 (strain AQ3810) GN=truA PE=3 SV=1	0	40.8453	41.4634	10	15	10	1	246	27.948	9.45	High	High	High		1.012	1.02	99	100.2	100.9	10	10	10	3.642	0	39.9967	10
FALSE	High	Master Protein	A6B761	3-deoxy-D-manno-octulosonic-acid transferase OS=Vibrio parahaemolyticus serotype O3:K6 (strain AQ3810) GN=A79_5891 PE=4 SV=1	0	40.8053	22.2222	8	14	8	1	423	47.604	8.95	High	High	High		0.943	1.14	97.3	91.8	110.9	8	8	8	2.008	0	36.2151	8
FALSE	High	Master Protein	A6B1A6	DNA-binding HTH domain-containing protein OS=Vibrio parahaemolyticus serotype O3:K6 (strain AQ3810) GN=A79_1396 PE=4 SV=1	0	40.7281	37.3272	6	13	6	1	217	24.615	5.6	High	High	High		0.591	0.73	129.3	76.4	94.3	6	6	6	3.394	0	39.1484	6
FALSE	High	Master Protein	A6B4F2	Chromosome partition protein MukF OS=Vibrio parahaemolyticus serotype O3:K6 (strain AQ3810) GN=mukF PE=3 SV=1	0	40.6521	27.8281	8	8	8	1	442	50.773	4.79	High	High	High		0.682	1.026	110.8	75.5	113.7	8	8	8	0.887	0	32.0387	8
FALSE	High	Master Protein	A6AY65	7-cyano-7-deazaguanine synthase OS=Vibrio parahaemolyticus serotype O3:K6 (strain AQ3810) GN=queC PE=3 SV=1	0	40.6205	33.1897	5	8	5	1	232	25.483	5.12	High	High	High		0.857	0.985	105.6	90.5	103.9	6	6	6	2.162	0	33.1367	5
FALSE	High	Master Protein	A6B9H2	30S ribosomal protein S14 OS=Vibrio parahaemolyticus serotype O3:K6 (strain AQ3810) GN=rpsN PE=3 SV=1	0	40.5811	36.6337	3	43	3	1	101	11.419	10.99	High	High	High		0.353	0.997	127.7	45.1	127.2	4	4	4	24.119	0	179.114	3
FALSE	High	Master Protein	A6AYT6	HD-domain protein OS=Vibrio parahaemolyticus serotype O3:K6 (strain AQ3810) GN=A79_6165 PE=4 SV=1	0	40.4848	28.7841	10	15	10	1	403	44.825	6.84	High	High	High		1.066	1.075	95.5	101.8	102.7	10	10	10	1.649	0	51.0052	10
FALSE	High	Master Protein	A6B6Q5	Ribosomal RNA small subunit methyltransferase F OS=Vibrio parahaemolyticus serotype O3:K6 (strain AQ3810) GN=rsmF PE=3 SV=1	0	40.4588	21.1297	10	15	10	1	478	53.415	5.49	High	High	High		0.889	0.938	106.1	94.3	99.6	10	10	10	2.34	0	41.0672	10
FALSE	High	Master Protein	A6AYF7	Chemotaxis protein CheV OS=Vibrio parahaemolyticus serotype O3:K6 (strain AQ3810) GN=A79_1553 PE=4 SV=1	0	40.4376	30.03	9	13	9	1	333	37.508	5.12	High	High	High		0.761	0.821	116.2	88.4	95.4	9	9	9	1.848	0	41.0853	9
FALSE	High	Master Protein	A6AZ11	Nicotinate-nucleotide--dimethylbenzimidazole phosphoribosyltransferase OS=Vibrio parahaemolyticus serotype O3:K6 (strain AQ3810) GN=cobT PE=3 SV=1	0	40.4275	19.0202	7	17	7	1	347	36.891	5.29	High	High	High		1.045	0.978	99.2	103.7	97.1	7	7	7	2.793	0	34.8137	7
FALSE	High	Master Protein	A6B516	Methylglyoxal synthase OS=Vibrio parahaemolyticus serotype O3:K6 (strain AQ3810) GN=mgsA PE=3 SV=1	0	40.3326	24.5033	2	6	2	1	151	16.954	6.8	High	High	High		0.606	1.068	112.2	68	119.8	3	3	3	3.217	0	33.841	2
FALSE	High	Master Protein	A6B906	MukF protein OS=Vibrio parahaemolyticus serotype O3:K6 (strain AQ3810) GN=A79_5498 PE=4 SV=1	0	40.3151	24.3697	5	9	5	1	238	26.606	5.01	High	High	High		0.871	1.025	103.6	90.2	106.2	5	5	5	2.162	0	40.7966	5
FALSE	High	Master Protein	A6B2A1	Sulfurtransferase FdhD OS=Vibrio parahaemolyticus serotype O3:K6 (strain AQ3810) GN=fdhD PE=3 SV=1	0	40.2967	38.6282	7	8	7	1	277	30.579	5.91	High	High	High		0.905	1.032	102.1	92.5	105.4	7	7	7	1.154	0	32.4171	7
FALSE	High	Master Protein	A6B4A6	Hydroxymethylpyrimidine-binding protein OS=Vibrio parahaemolyticus serotype O3:K6 (strain AQ3810) GN=A79_0105 PE=4 SV=1	0	40.2965	32.9114	7	12	7	1	316	34.755	5.77	High	High	High		0.712	1.053	108.5	77.3	114.2	8	8	8	2.36	0	33.125	7
FALSE	High	Master Protein	A6B5R3	3-isopropylmalate dehydrogenase OS=Vibrio parahaemolyticus serotype O3:K6 (strain AQ3810) GN=leuB PE=3 SV=1	0	40.266	25.0689	8	16	8	1	363	39.309	4.94	High	High	High		0.825	1.015	105.6	87.1	107.2	8	8	8	1.721	0	50.6097	8
FALSE	High	Master Protein	A6BC48	Malonyl CoA-acyl carrier protein transacylase OS=Vibrio parahaemolyticus serotype O3:K6 (strain AQ3810) GN=A79_1661 PE=4 SV=1	0	40.2472	57.4257	2	6	2	1	101	10.91	4.35	High	High	High		0.632	1.057	111.6	70.5	117.9	3	3	3	16.783	0	36.9105	2
FALSE	High	Master Protein	A6AZ74	3-methylcrotonyl CoA carboxylase, beta subunit OS=Vibrio parahaemolyticus serotype O3:K6 (strain AQ3810) GN=A79_4486 PE=4 SV=1	0	40.2252	22.9907	8	9	6	1	535	58.175	6.06	High	High	High		0.882	0.772	113.1	99.7	87.2	8	8	8	0.931	2	34.2085	8
FALSE	High	Master Protein	A6BA15	Methyl-accepting chemotaxis transducer/sensory box protein OS=Vibrio parahaemolyticus serotype O3:K6 (strain AQ3810) GN=A79_3547 PE=4 SV=1	0	40.2011	33.9367	6	12	6	1	221	25.39	6.3	High	High	High		1.041	0.966	99.7	103.9	96.4	6	6	6	1.637	0	28.9452	6
FALSE	High	Master Protein	A6B2S8	C4-dicarboxylate-binding periplasmic protein OS=Vibrio parahaemolyticus serotype O3:K6 (strain AQ3810) GN=A79_2316 PE=4 SV=1	0	40.1988	13.5542	3	8	3	1	332	37.137	6.28	High	High	High		0.618	1.556	94.5	58.4	147	3	3	3	0.688	0	34.7799	3
FALSE	High	Master Protein	A6AZH1	RecBCD enzyme subunit RecD OS=Vibrio parahaemolyticus serotype O3:K6 (strain AQ3810) GN=recD PE=3 SV=1	0	40.124	14.8252	10	13	10	1	715	78.627	6.83	High	High	High		1.156	1.054	93.5	108	98.5	10	10	10	0.848	0	33.0904	10
FALSE	High	Master Protein	A6BB37	Acetylornithine deacetylase OS=Vibrio parahaemolyticus serotype O3:K6 (strain AQ3810) GN=A79_4554 PE=4 SV=1	0	40.0535	38.8889	6	8	3	1	216	24.111	5.66	High	High	High		0.579	1.056	113.8	65.9	120.2	6	6	6	1.929	3	29.4981	6
FALSE	High	Master Protein	A6B3X4	Uncharacterized protein OS=Vibrio parahaemolyticus serotype O3:K6 (strain AQ3810) GN=A79_2027 PE=4 SV=1	0	40.0193	16.4671	4	12	4	1	334	35.796	5.99	High	High	High		0.929	0.643	116.7	108.4	75	4	4	4	2.831	0	45.9009	4
FALSE	High	Master Protein	A6B4K5	Hpt domain protein OS=Vibrio parahaemolyticus serotype O3:K6 (strain AQ3810) GN=A79_5061 PE=4 SV=1	0	39.94	25.1748	9	14	9	1	429	47.91	5.1	High	High	High		1.045	0.877	102.7	107.3	90	9	9	9	1.649	0	35.3207	9
FALSE	High	Master Protein	A6B5G7	Outer membrane protein OS=Vibrio parahaemolyticus serotype O3:K6 (strain AQ3810) GN=A79_3988 PE=3 SV=1	0	39.8731	57.561	7	13	7	1	205	22.423	4.93	High	High	High		0.937	1.126	97.9	91.8	110.3	8	8	8	7.111	0	39.7528	7
FALSE	High	Master Protein	A6B4J5	Co-chaperone protein HscB homolog OS=Vibrio parahaemolyticus serotype O3:K6 (strain AQ3810) GN=hscB PE=3 SV=1	0	39.8621	53.2164	6	11	6	1	171	19.817	4.94	High	High	High		0.769	1.269	98.7	76	125.3	6	6	6	4.995	0	43.4309	6
FALSE	High	Master Protein	A6B8J5	Signal peptidase I OS=Vibrio parahaemolyticus serotype O3:K6 (strain AQ3810) GN=lepB PE=3 SV=1	0	39.7272	34.4482	8	17	8	1	299	33.675	7.93	High	High	High		0.804	1.013	106.5	85.6	107.9	9	9	9	2.793	0	46.2985	8
FALSE	High	Master Protein	A6B092	Hemolysin OS=Vibrio parahaemolyticus serotype O3:K6 (strain AQ3810) GN=A79_2832 PE=4 SV=1	0	39.675	22.093	3	24	3	1	86	9.596	4.54	High	High	High		1.583	1.024	83.2	131.6	85.2	6	6	6	176.828	0	63.0547	3
FALSE	High	Master Protein	A6AX58	Ferrichrome receptor OS=Vibrio parahaemolyticus serotype O3:K6 (strain AQ3810) GN=A79_0498 PE=3 SV=1	0	39.6152	17.9598	9	13	9	1	696	76.971	4.72	High	High	High		1.754	1.007	79.8	139.9	80.3	9	9	9	0.84	0	43.4736	9
FALSE	High	Master Protein	A6AX54	Small-conductance mechanosensitive channel OS=Vibrio parahaemolyticus serotype O3:K6 (strain AQ3810) GN=A79_0494 PE=4 SV=1	0	39.6137	22.4913	6	14	6	1	289	33.348	6.62	High	High	High		1.047	0.879	102.5	107.4	90.1	6	6	6	2.594	0	46.4208	6
FALSE	High	Master Protein	A6AX77	Putative NADP-dependent oxidoreductase yncb OS=Vibrio parahaemolyticus serotype O3:K6 (strain AQ3810) GN=A79_0517 PE=4 SV=1	0	39.5853	25	6	9	6	1	344	37.472	5.19	High	High	High		0.98	1.09	97.7	95.8	106.5	6	6	6	1.929	0	33.6227	6
FALSE	High	Master Protein	A6B982	Regulator of ribonuclease activity A OS=Vibrio parahaemolyticus serotype O3:K6 (strain AQ3810) GN=rraA PE=3 SV=1	0	39.5723	35.8824	4	22	4	1	170	18.395	3.84	High	High	High		0.715	0.915	114.1	81.5	104.4	4	4	4	13.678	0	72.275	4
FALSE	High	Master Protein	A6B5T9	O-succinylhomoserine (Thiol)-lyase OS=Vibrio parahaemolyticus serotype O3:K6 (strain AQ3810) GN=metB PE=3 SV=1	0	39.5355	18.1347	4	8	4	1	386	41.835	5.86	High	High	High		1.09	0.978	97.8	106.6	95.6	4	4	4	1.254	0	34.6512	4
FALSE	High	Master Protein	A6AZZ2	ATPase involved in DNA repair OS=Vibrio parahaemolyticus serotype O3:K6 (strain AQ3810) GN=A79_2633 PE=4 SV=1	0	39.3837	30.303	4	8	4	1	165	18.654	8.15	High	High	High		1.275	0.911	94.2	120	85.8	4	4	4	3.642	0	27.5448	4
FALSE	High	Master Protein	A6B2Z4	5'-deoxynucleotidase A79_5036 OS=Vibrio parahaemolyticus serotype O3:K6 (strain AQ3810) GN=A79_5036 PE=3 SV=1	0	39.2618	37.8641	9	19	9	1	206	23.507	5.74	High	High	High		0.798	0.762	117.2	93.5	89.3	10	10	10	9	0	39.4051	9
FALSE	High	Master Protein	A6B8G7	Msha biogenesis protein mshj OS=Vibrio parahaemolyticus serotype O3:K6 (strain AQ3810) GN=A79_4671 PE=4 SV=1	0	39.2347	27.3148	6	16	6	1	216	24.614	4.98	High	High	High		1.078	1.012	97.1	104.7	98.2	7	7	7	7.254	0	39.4056	6
FALSE	High	Master Protein	A6B7S9	Maf-like protein maf OS=Vibrio parahaemolyticus serotype O3:K6 (strain AQ3810) GN=maf PE=3 SV=1	0	39.2327	33.6788	6	9	6	1	193	21.531	5.1	High	High	High		1.055	0.887	102	107.6	90.5	6	6	6	3.642	0	35.0621	6
FALSE	High	Master Protein	A6B7V5	Ribosome-recycling factor OS=Vibrio parahaemolyticus serotype O3:K6 (strain AQ3810) GN=frr PE=3 SV=1	0	39.2027	40.5405	4	19	4	1	185	20.59	6.3	High	High	High		0.384	1.078	121.8	46.8	131.3	5	5	5	2.831	0	55.0876	4
FALSE	High	Master Protein	A6B6C3	Putative pre-16S rRNA nuclease OS=Vibrio parahaemolyticus serotype O3:K6 (strain AQ3810) GN=A79_3012 PE=3 SV=1	0	39.1617	62.4113	7	11	7	1	141	15.588	5.59	High	High	High		0.795	0.985	107.9	85.8	106.3	7	7	7	9	0	33.3632	7
FALSE	High	Master Protein	A6BAB9	Uncharacterized protein (Fragment) OS=Vibrio parahaemolyticus serotype O3:K6 (strain AQ3810) GN=A79_4595 PE=4 SV=1	0	39.0621	32.3194	5	9	5	1	263	28.857	7.87	High	High	High		0.842	1.051	103.7	87.3	109	5	5	5	1.512	0	39.9554	5
FALSE	High	Master Protein	A6B914	Protoporphyrinogen oxidase OS=Vibrio parahaemolyticus serotype O3:K6 (strain AQ3810) GN=A79_3386 PE=4 SV=1	0	38.9238	38.8571	8	18	8	1	175	20.553	7.36	High	High	High		1.073	1.13	93.7	100.5	105.8	9	9	9	10.938	0	32.4736	8
FALSE	High	Master Protein	A6B157	HAD-superfamily hydrolase, subfamily IA, variant 1 OS=Vibrio parahaemolyticus serotype O3:K6 (strain AQ3810) GN=A79_1840 PE=4 SV=1	0	38.8232	39.604	6	10	6	1	202	23.219	5.16	High	High	High		1.153	0.984	95.6	110.3	94.1	6	6	6	5.31	0	34.3784	6
FALSE	High	Master Protein	A6BAD8	Transcriptional regulator, LuxR family OS=Vibrio parahaemolyticus serotype O3:K6 (strain AQ3810) GN=A79_5538 PE=4 SV=1	0	38.7902	38.4937	9	15	9	1	239	27.279	6.86	High	High	High		0.943	0.844	107.6	101.5	90.9	9	9	9	3.084	0	40.8639	9
FALSE	High	Master Protein	A6B5A8	Nitrogen regulation protein NR(I) OS=Vibrio parahaemolyticus serotype O3:K6 (strain AQ3810) GN=ntrC PE=4 SV=1	0	38.7646	19.7002	7	9	7	1	467	52.287	5.73	High	High	High		0.813	1.01	106.3	86.4	107.3	7	7	7	0.874	0	21.0613	7
FALSE	High	Master Protein	A6B997	Acyl-CoA thioester hydrolase YciA OS=Vibrio parahaemolyticus serotype O3:K6 (strain AQ3810) GN=A79_3623 PE=4 SV=1	0	38.6551	49.6183	5	8	5	1	131	14.14	6.57	High	High	High		0.71	0.909	114.6	81.3	104.1	5	5	5	4.995	0	26.8155	5
FALSE	High	Master Protein	A6B6X5	Uncharacterized protein OS=Vibrio parahaemolyticus serotype O3:K6 (strain AQ3810) GN=A79_1218 PE=4 SV=1	0	38.4584	29.368	7	10	7	1	269	30.965	5.19	High	High	High		0.91	0.982	103.7	94.4	101.9	7	7	7	1.955	0	28.4833	7
FALSE	High	Master Protein	A6B3G8	Molybdopterin converting factor, subunit 2 OS=Vibrio parahaemolyticus serotype O3:K6 (strain AQ3810) GN=moaE PE=4 SV=1	0	38.4574	32.4503	3	7	3	1	151	17.12	5.14	High	High	High		0.762	1.14	103.4	78.8	117.8	5	5	5	3.642	0	29.8128	3
FALSE	High	Master Protein	A6B7B6	Enzyme with alpha/beta-hydrolase domain OS=Vibrio parahaemolyticus serotype O3:K6 (strain AQ3810) GN=A79_2720 PE=4 SV=1	0	38.374	33.1343	10	15	10	1	335	37.834	8.35	High	High	High		0.924	0.91	105.9	97.8	96.3	11	11	11	2.511	0	36.011	10
FALSE	High	Master Protein	A6B7R5	Acyl-CoA synthetase OS=Vibrio parahaemolyticus serotype O3:K6 (strain AQ3810) GN=A79_4635 PE=4 SV=1	0	38.2525	14.6199	6	8	6	1	513	56.76	5.54	High	High	High		0.893	0.933	106.1	94.8	99	6	6	6	0.931	0	30.0822	6
FALSE	High	Master Protein	A6B3V7	SMP protein OS=Vibrio parahaemolyticus serotype O3:K6 (strain AQ3810) GN=A79_2966 PE=4 SV=1	0	38.2212	36.8715	5	10	5	1	179	20.122	9.45	High	High	High		1.527	1.077	83.2	127.1	89.7	5	5	5	1.894	0	37.7028	5
FALSE	High	Master Protein	A6B0X3	Phosphotransferase system, eiib domain protein OS=Vibrio parahaemolyticus serotype O3:K6 (strain AQ3810) GN=A79_5436 PE=4 SV=1	0	38.2125	43.8776	4	9	4	1	98	10.9	7.44	High	High	High		0.949	0.888	105.7	100.4	93.9	4	4	4	13.678	0	31.0558	4
FALSE	High	Master Protein	A6AYY0	Binding-protein-dependent transport systems inner membrane component OS=Vibrio parahaemolyticus serotype O3:K6 (strain AQ3810) GN=A79_6211 PE=3 SV=1	0	38.1913	20.6573	7	16	7	1	426	47.902	9.39	High	High	High		0.918	1.157	97.5	89.6	112.9	7	7	7	2.36	0	49.6401	7
FALSE	High	Master Protein	A6AY58	Probable AcnD-accessory protein PrpF OS=Vibrio parahaemolyticus serotype O3:K6 (strain AQ3810) GN=prpF PE=4 SV=1	0	38.1075	21.8593	9	13	9	1	398	42.321	4.96	High	High	High		1.101	0.937	98.7	108.7	92.5	9	9	9	2.981	0	35.0449	9
FALSE	High	Master Protein	A6B0V7	Carboxypeptidase G2 OS=Vibrio parahaemolyticus serotype O3:K6 (strain AQ3810) GN=A79_5420 PE=4 SV=1	0	38.0487	24.8663	6	12	6	1	374	40.501	4.61	High	High	High		0.38	0.847	134.7	51.2	114.1	6	6	6	2.981	0	32.6375	6
FALSE	High	Master Protein	A6B1F4	Alpha-galactosidase OS=Vibrio parahaemolyticus serotype O3:K6 (strain AQ3810) GN=A79_0158 PE=4 SV=1	0	38.0021	11.2263	7	18	7	1	579	65.948	5.41	High	High	High		0.914	0.987	103.4	94.5	102.1	7	7	7	1.395	0	47.7612	7
FALSE	High	Master Protein	A6AX38	TPR repeat containing protein OS=Vibrio parahaemolyticus serotype O3:K6 (strain AQ3810) GN=A79_0478 PE=4 SV=1	0	37.9519	18.677	8	11	8	1	514	57.716	6.09	High	High	High		0.884	0.998	104.1	92	103.9	8	8	8	1.471	0	27.1168	8
FALSE	High	Master Protein	A6B482	Peroxiredoxin OS=Vibrio parahaemolyticus serotype O3:K6 (strain AQ3810) GN=ahpC PE=4 SV=1	0	37.9219	41.0811	5	9	5	1	185	20.559	4.89	High	High	High		0.452	0.782	134.2	60.7	105	5	5	5	2.511	0	39.0159	5
FALSE	High	Master Protein	A6AZ33	GTP cyclohydrolase 1 OS=Vibrio parahaemolyticus serotype O3:K6 (strain AQ3810) GN=folE PE=3 SV=1	0	37.9102	36.4055	7	19	7	1	217	24.381	6.65	High	High	High		0.947	0.903	105.3	99.6	95.1	8	8	8	3.217	0	55.1685	7
FALSE	High	Master Protein	A6B9D8	NAD(P)H-flavin reductase (NAD(P)H:flavin oxidoreductase) OS=Vibrio parahaemolyticus serotype O3:K6 (strain AQ3810) GN=A79_1460 PE=4 SV=1	0	37.8204	29.9578	7	13	7	1	237	26.418	5.05	High	High	High		0.819	1.033	105.2	86.1	108.7	7	7	7	2.415	0	37.8722	7
FALSE	High	Master Protein	A6B3R2	High frequency lysogenization protein HflD homolog OS=Vibrio parahaemolyticus serotype O3:K6 (strain AQ3810) GN=hflD PE=3 SV=1	0	37.8164	25.3659	4	13	4	1	205	22.647	9.42	High	High	High		0.955	0.985	102	97.5	100.5	4	4	4	2.455	0	47.3134	4
FALSE	High	Master Protein	A6B0J4	Type IV pilus assembly protein PilZ OS=Vibrio parahaemolyticus serotype O3:K6 (strain AQ3810) GN=A79_3707 PE=4 SV=1	0	37.792	37.4384	7	11	7	1	203	22.869	7.03	High	High	High		1.069	0.942	99.6	106.5	93.9	7	7	7	4.878	0	32.6694	7
FALSE	High	Master Protein	A6B0X7	Pyridoxal kinase PdxY OS=Vibrio parahaemolyticus serotype O3:K6 (strain AQ3810) GN=pdxY PE=3 SV=1	0	37.6615	29.0657	5	10	5	1	289	31.551	5.29	High	High	High		0.658	0.814	121.4	79.9	98.8	5	5	5	2.455	0	31.711	5
FALSE	High	Master Protein	A6B9L1	Electron transport complex subunit C OS=Vibrio parahaemolyticus serotype O3:K6 (strain AQ3810) GN=A79_3322 PE=3 SV=1	0	37.6028	17.4779	6	9	6	1	452	49.05	7.8	High	High	High		0.771	0.958	109.9	84.7	105.3	6	6	6	0.978	0	25.2955	6
FALSE	High	Master Protein	A6B0D6	PTS system, fructose-specific IIA component OS=Vibrio parahaemolyticus serotype O3:K6 (strain AQ3810) GN=A79_2876 PE=4 SV=1	0	37.4349	29.4521	4	12	4	1	146	16.333	4.81	High	High	High		0.434	0.745	137.7	59.8	102.6	4	4	4	4.012	0	44.469	4
FALSE	High	Master Protein	A6B3F2	Maltodextrin glucosidase OS=Vibrio parahaemolyticus serotype O3:K6 (strain AQ3810) GN=A79_1174 PE=3 SV=1	0	37.4336	15.2961	8	13	8	1	608	70.242	6	High	High	High		1.186	0.911	96.9	114.8	88.3	8	8	8	0.84	0	41.9392	8
FALSE	High	Master Protein	A6B4T0	Uncharacterized protein OS=Vibrio parahaemolyticus serotype O3:K6 (strain AQ3810) GN=A79_6284 PE=4 SV=1	0	37.3367	32.5203	5	8	5	1	246	27.24	5.2	High	High	High		0.905	0.961	104.7	94.7	100.6	5	5	5	3.329	0	31.7216	5
FALSE	High	Master Protein	A6B145	Acetoacetyl-CoA synthase OS=Vibrio parahaemolyticus serotype O3:K6 (strain AQ3810) GN=A79_1828 PE=4 SV=1	0	37.317	16.7683	8	11	8	1	656	73.847	5.33	High	High	High		0.983	0.879	104.8	103	92.1	8	8	8	0.668	0	38.3669	8
FALSE	High	Master Protein	A6B2X4	Transcriptional reguator, TetR family OS=Vibrio parahaemolyticus serotype O3:K6 (strain AQ3810) GN=A79_5016 PE=4 SV=1	0	37.2868	40.7583	5	10	5	1	211	24.448	5.57	High	High	High		0.939	0.925	104.8	98.3	96.9	6	6	6	3.642	0	36.7897	5
FALSE	High	Master Protein	A6B1C6	Nucleoprotein/polynucleotide-associated enzyme OS=Vibrio parahaemolyticus serotype O3:K6 (strain AQ3810) GN=A79_1416 PE=4 SV=1	0	37.2501	46.2428	7	17	7	1	173	19.607	8.68	High	High	High		0.612	0.903	119.3	73	107.7	8	8	8	9	0	50.376	7
FALSE	High	Master Protein	A6B8V9	Cell division ATP-binding protein (Fragment) OS=Vibrio parahaemolyticus serotype O3:K6 (strain AQ3810) GN=A79_1097 PE=4 SV=1	0	37.1728	52.4823	8	17	8	1	141	15.788	10.13	High	High	High		1.053	0.994	98.5	103.7	97.9	8	8	8	9	0	43.773	8
FALSE	High	Master Protein	A6B0L9	Peptidase T OS=Vibrio parahaemolyticus serotype O3:K6 (strain AQ3810) GN=pepT PE=3 SV=1	0	37.1595	27.3608	7	9	7	1	413	45.302	4.94	High	High	High		0.614	0.836	122.4	75.2	102.4	8	8	8	1.818	0	29.9994	7
FALSE	High	Master Protein	A6B5D2	Mg-dependent DNase OS=Vibrio parahaemolyticus serotype O3:K6 (strain AQ3810) GN=A79_1717 PE=4 SV=1	0	37.0887	27.8431	5	15	5	1	255	28.709	5.27	High	High	High		0.734	0.991	110.1	80.8	109.1	6	6	6	4.179	0	46.4096	5
FALSE	High	Master Protein	A6B7N5	Cyclic nucleotide binding protein/2 CBS domains (Fragment) OS=Vibrio parahaemolyticus serotype O3:K6 (strain AQ3810) GN=A79_2146 PE=4 SV=1	0	37.082	32.9787	5	11	3	1	188	21.532	9.82	High	High	High		1.067	0.906	100.9	107.7	91.4	3	3	3	2.455	0	30.9959	5
FALSE	High	Master Protein	A6B0M3	Methyl-accepting chemotaxis protein OS=Vibrio parahaemolyticus serotype O3:K6 (strain AQ3810) GN=A79_3736 PE=4 SV=1	0	37.0165	13.7521	8	17	7	1	589	64.791	5.19	High	High	High		1.037	1.07	96.6	100.2	103.3	7	7	7	1.212	0	56.6905	8
FALSE	High	Master Protein	A6AZ76	Transcriptional regulator, MerR family OS=Vibrio parahaemolyticus serotype O3:K6 (strain AQ3810) GN=A79_4488 PE=4 SV=1	0	36.9889	42.1875	5	13	4	1	128	14.969	9.26	High	High	High		1.061	1.013	97.6	103.5	98.9	5	5	5	18.307	0	37.2858	5
FALSE	High	Master Protein	A6AZ27	Diguanylate cyclase/phosphodiesterase OS=Vibrio parahaemolyticus serotype O3:K6 (strain AQ3810) GN=A79_4439 PE=4 SV=1	0	36.9658	11.4024	7	12	7	1	763	87.359	5.76	High	High	High		0.996	0.841	105.7	105.4	88.9	7	7	7	0.619	0	34.5937	7
FALSE	High	Master Protein	A6B547	Uncharacterized protein (Fragment) OS=Vibrio parahaemolyticus serotype O3:K6 (strain AQ3810) GN=A79_5794 PE=4 SV=1	0	36.9078	40.7767	5	21	5	1	103	12.008	8.66	High	High	High		1.196	0.996	94	112.4	93.6	7	7	7	41.17	0	43.7828	5
FALSE	High	Master Protein	A6B3S7	Histidine biosynthesis bifunctional protein HisIE OS=Vibrio parahaemolyticus serotype O3:K6 (strain AQ3810) GN=hisI PE=3 SV=1	0	36.9019	30.3318	4	7	4	1	211	23.24	5.07	High	High	High		1.116	0.937	98.3	109.7	92.1	4	4	4	3.217	0	28.5552	4
FALSE	High	Master Protein	A6B2F5	Tetrathionate reductase, subunit B OS=Vibrio parahaemolyticus serotype O3:K6 (strain AQ3810) GN=A79_4780 PE=4 SV=1	0	36.8689	22.3529	4	10	4	1	255	27.716	7.44	High	High	High		0.704	1.433	95.6	67.3	137	4	4	4	1.581	0	31.3026	4
FALSE	High	Master Protein	A6AYX0	Periplasmic oligopeptide-binding protein OS=Vibrio parahaemolyticus serotype O3:K6 (strain AQ3810) GN=A79_6201 PE=4 SV=1	0	36.7821	12.0858	6	15	5	1	513	57.866	6.24	High	High	High		0.568	1.487	98.2	55.8	146	5	5	5	1.154	0	38.1583	6
FALSE	High	Master Protein	A6B054	Acyl-coenzyme A dehydrogenase OS=Vibrio parahaemolyticus serotype O3:K6 (strain AQ3810) GN=A79_2697 PE=4 SV=1	0	36.718	14.2506	8	10	8	1	814	88.557	7.14	High	High	High		0.817	0.91	110	89.8	100.2	8	8	8	0.54	0	30.0667	8
FALSE	High	Master Protein	A6B5K9	NADH pyrophosphatase OS=Vibrio parahaemolyticus serotype O3:K6 (strain AQ3810) GN=nudC PE=3 SV=1	0	36.6993	26.9231	6	13	6	1	260	29.277	5.1	High	High	High		0.981	0.928	103.1	101.2	95.7	7	7	7	4.179	0	29.7568	6
FALSE	High	Master Protein	A6B8I5	Biotin-[acetyl-CoA-carboxylase] ligase (Fragment) OS=Vibrio parahaemolyticus serotype O3:K6 (strain AQ3810) GN=A79_6057 PE=4 SV=1	0	36.5984	28.8194	6	10	4	1	288	31.873	8.13	High	High	High		1.118	0.966	97.3	108.7	94	6	6	6	2.728	2	34.3484	6
FALSE	High	Master Protein	A6BA40	K(+)/H(+) antiporter NhaP2 (Fragment) OS=Vibrio parahaemolyticus serotype O3:K6 (strain AQ3810) GN=A79_5613 PE=3 SV=1	0	36.5916	13.1868	6	11	6	1	546	58.839	5.36	High	High	High		1.124	0.818	102	114.6	83.4	6	6	6	1.783	0	38.0706	6
FALSE	High	Master Protein	A6B555	Phospho-2-dehydro-3-deoxyheptonate aldolase OS=Vibrio parahaemolyticus serotype O3:K6 (strain AQ3810) GN=A79_2098 PE=3 SV=1	0	36.52	15.4062	6	21	4	1	357	39.641	5.87	High	High	High		0.913	0.855	108.4	99	92.6	4	4	4	1.994	0	44.3415	6
FALSE	High	Master Protein	A6B878	Probable chorismate pyruvate-lyase OS=Vibrio parahaemolyticus serotype O3:K6 (strain AQ3810) GN=ubiC PE=3 SV=1	0	36.4735	33.5196	4	6	4	1	179	20.733	5.39	High	High	High		0.87	0.908	108	94	98	4	4	4	4.623	0	24.7295	4
FALSE	High	Master Protein	A6B7I7	Beta-ureidopropionase OS=Vibrio parahaemolyticus serotype O3:K6 (strain AQ3810) GN=A79_2137 PE=4 SV=1	0	36.4297	35.1648	6	11	5	1	273	30.064	6.65	High	High	High		1.256	1.097	89.5	112.4	98.2	5	5	5	2.162	0	35.618	6
FALSE	High	Master Protein	A6B7K1	Uncharacterized protein OS=Vibrio parahaemolyticus serotype O3:K6 (strain AQ3810) GN=A79_4955 PE=4 SV=1	0	36.3929	39.8268	7	9	7	1	231	25.805	9.45	High	High	High		0.613	0.908	119	72.9	108	7	7	7	2.415	0	30.2207	7
FALSE	High	Master Protein	A6B4N7	Succinate dehydrogenase, cytochrome b556 subunit OS=Vibrio parahaemolyticus serotype O3:K6 (strain AQ3810) GN=sdhC PE=4 SV=1	0	36.3875	25.3968	2	10	2	1	126	13.683	7.65	High	High	High		1.2	0.993	93.9	112.8	93.3	3	3	3	5.813	0	54.5264	2
FALSE	High	Master Protein	A6B5U2	Transcriptional regulator, PadR family protein OS=Vibrio parahaemolyticus serotype O3:K6 (strain AQ3810) GN=A79_1354 PE=4 SV=1	0	36.2779	39.7906	7	16	7	1	191	21.944	5.3	High	High	High		1.023	1.276	90.9	93	116.1	7	7	7	3.924	0	43.8007	7
FALSE	High	Master Protein	A6BAP4	HTH domain family (Fragment) OS=Vibrio parahaemolyticus serotype O3:K6 (strain AQ3810) GN=A79_5686 PE=4 SV=1	0	36.2455	19.8966	6	9	6	1	387	42.916	6.43	High	High	High		0.764	0.937	111.1	84.9	104.1	6	6	6	1.154	0	32.6974	6
FALSE	High	Master Protein	A6B116	Uncharacterized protein OS=Vibrio parahaemolyticus serotype O3:K6 (strain AQ3810) GN=A79_6080 PE=4 SV=1	0	36.0987	17.9878	5	9	5	1	328	36.569	4.64	High	High	High		1.128	1.031	95	107.1	97.9	5	5	5	2.162	0	31.5026	5
FALSE	High	Master Protein	A6B0S5	ATPase with chaperone activity, ATP-binding subunit OS=Vibrio parahaemolyticus serotype O3:K6 (strain AQ3810) GN=A79_3501 PE=4 SV=1	0	36.0159	10.1754	7	16	6	1	855	93.849	5.02	High	High	High		0.616	0.925	118.1	72.7	109.2	6	6	6	0.668	0	38.8841	7
FALSE	High	Master Protein	A6B577	TolR OS=Vibrio parahaemolyticus serotype O3:K6 (strain AQ3810) GN=A79_0294 PE=3 SV=1	0	35.9848	10.7692	4	11	4	1	455	49.17	5.81	High	High	High		1.081	0.979	98	106	96	4	4	4	0.711	0	31.0175	4
FALSE	High	Master Protein	A6B5J0	Enoyl-[acyl-carrier-protein] reductase [NADH] OS=Vibrio parahaemolyticus serotype O3:K6 (strain AQ3810) GN=fabV PE=3 SV=1	0	35.9734	15.2882	5	12	5	1	399	43.995	5.11	High	High	High		1.033	0.917	101.7	105.1	93.2	6	6	6	1.154	0	42.3072	5
FALSE	High	Master Protein	A6B3S4	Imidazole glycerol phosphate synthase subunit HisH OS=Vibrio parahaemolyticus serotype O3:K6 (strain AQ3810) GN=hisH PE=3 SV=1	0	35.9245	29.902	6	13	6	1	204	22.33	4.94	High	High	High		1.226	1.06	91.3	112	96.8	6	6	6	9	0	38.5066	6
FALSE	High	Master Protein	A6B9E5	2-polyprenyl-6-methoxyphenol 4-hydroxylase OS=Vibrio parahaemolyticus serotype O3:K6 (strain AQ3810) GN=ubiH PE=4 SV=1	0	35.7907	20.9184	8	12	8	1	392	43.35	6.43	High	High	High		1.019	0.948	101.1	103	95.9	8	8	8	1.721	0	38.0725	8
FALSE	High	Master Protein	A6BBY6	30S ribosomal protein S18 OS=Vibrio parahaemolyticus serotype O3:K6 (strain AQ3810) GN=rpsR PE=3 SV=1	0	35.6914	53.3333	4	24	4	1	75	8.838	10.43	High	High	High		0.454	1.124	116.4	52.8	130.8	4	4	4	99	0	69.59	4
FALSE	High	Master Protein	A6AYJ3	HAD superfamily hydrolase OS=Vibrio parahaemolyticus serotype O3:K6 (strain AQ3810) GN=A79_1590 PE=4 SV=1	0	35.6903	29.2683	5	10	5	1	205	23.416	4.7	High	High	High		1.205	0.817	99.3	119.6	81.1	5	5	5	3.924	0	27.8808	5
FALSE	High	Master Protein	A6BB35	50S ribosomal protein L27 OS=Vibrio parahaemolyticus serotype O3:K6 (strain AQ3810) GN=rpmA PE=3 SV=1	0	35.5029	49.4118	4	25	4	1	85	9.202	10.59	High	High	High		0.429	0.959	125.7	53.9	120.5	4	4	4	14.849	0	98.1934	4
FALSE	High	Master Protein	A6B6I1	HTH-type transcriptional regulator CysB OS=Vibrio parahaemolyticus serotype O3:K6 (strain AQ3810) GN=A79_6039 PE=4 SV=1	0	35.4792	17.5926	7	16	7	1	324	36.075	6.6	High	High	High		0.86	0.961	106.4	91.5	102.2	7	7	7	3.467	0	35.6107	7
FALSE	High	Master Protein	A6B9G6	Lipopolysaccharide export system protein LptC OS=Vibrio parahaemolyticus serotype O3:K6 (strain AQ3810) GN=lptC PE=3 SV=1	0	35.4608	47.0588	5	8	5	1	187	20.855	4.81	High	High	High		1.089	1.02	96.5	105.1	98.4	5	5	5	3.329	0	31.9149	5
FALSE	High	Master Protein	A6AZD9	DNA helicase OS=Vibrio parahaemolyticus serotype O3:K6 (strain AQ3810) GN=A79_4248 PE=4 SV=1	0	35.4267	14.0406	7	8	7	1	641	72.158	6.4	High	High	High		0.96	0.928	103.9	99.8	96.4	7	7	7	0.63	0	26.8513	7
FALSE	High	Master Protein	A6B956	Sensory box/ggdef family protein OS=Vibrio parahaemolyticus serotype O3:K6 (strain AQ3810) GN=A79_3220 PE=4 SV=1	0	35.3849	12.7367	8	10	8	1	581	66.066	5.72	High	High	High		0.995	0.848	105.5	105	89.5	8	8	8	0.874	0	31.1778	8
FALSE	High	Master Protein	A6B536	Hydrolase OS=Vibrio parahaemolyticus serotype O3:K6 (strain AQ3810) GN=A79_5783 PE=4 SV=1	0	35.3015	33.5766	5	10	5	1	274	30.521	5.35	High	High	High		1.007	0.912	102.8	103.5	93.7	7	7	7	3.217	0	33.9093	5
FALSE	High	Master Protein	A6B1E1	Uncharacterized protein OS=Vibrio parahaemolyticus serotype O3:K6 (strain AQ3810) GN=A79_1431 PE=4 SV=1	0	35.2198	19.7101	5	7	5	1	345	38.955	9.1	High	High	High		0.734	1.06	107.4	78.8	113.9	5	5	5	1.015	0	25.2451	5
FALSE	High	Master Protein	A6B2P7	Uncharacterized protein OS=Vibrio parahaemolyticus serotype O3:K6 (strain AQ3810) GN=A79_0831 PE=4 SV=1	0	35.1585	27.907	7	10	7	1	301	33.679	9.09	High	High	High		0.939	0.909	105.4	98.9	95.7	7	7	7	2.162	0	36.2236	7
FALSE	High	Master Protein	A6B8B7	Transcriptional regulator, LacI family OS=Vibrio parahaemolyticus serotype O3:K6 (strain AQ3810) GN=A79_1085 PE=4 SV=1	0	35.0761	17.8571	6	11	6	1	336	37.699	6.73	High	High	High		1.004	0.932	102.2	102.6	95.2	6	6	6	1.512	0	33.7717	6
FALSE	High	Master Protein	A6B4X1	Endoribonuclease L-PSP, putative OS=Vibrio parahaemolyticus serotype O3:K6 (strain AQ3810) GN=A79_3057 PE=4 SV=1	0	35.0403	35.7143	3	9	3	1	126	13.478	6.04	High	High	High		0.633	0.714	127.8	80.9	91.3	3	3	3	4.179	0	36.8382	3
FALSE	High	Master Protein	A6B8R1	Phosphoglycolate phosphatase OS=Vibrio parahaemolyticus serotype O3:K6 (strain AQ3810) GN=gph PE=3 SV=1	0	35.0147	24.5614	4	11	4	1	228	24.63	4.7	High	High	High		0.554	1.013	116.8	64.8	118.4	5	5	5	3.642	0	33.8133	4
FALSE	High	Master Protein	A6B8H8	Transcriptional regulator OS=Vibrio parahaemolyticus serotype O3:K6 (strain AQ3810) GN=A79_4915 PE=4 SV=1	0	35.0131	28.5714	7	12	7	1	196	22.322	5.96	High	High	High		0.759	0.87	114.1	86.6	99.3	7	7	7	3.394	0	32.079	7
FALSE	High	Master Protein	A6B9M1	Cysteine desulfurase family protein (Fragment) OS=Vibrio parahaemolyticus serotype O3:K6 (strain AQ3810) GN=A79_4147 PE=4 SV=1	0	34.9134	15.2455	5	8	5	1	387	42.715	5.83	High	High	High		0.858	1.074	102.3	87.8	109.9	6	6	6	1.448	0	26.5071	5
FALSE	High	Master Protein	A6B0S6	Uncharacterized protein OS=Vibrio parahaemolyticus serotype O3:K6 (strain AQ3810) GN=A79_3502 PE=4 SV=1	0	34.8439	32.0755	5	9	5	1	159	17.747	4.96	High	High	High		0.361	0.704	145.3	52.4	102.3	5	5	5	3.642	0	30.103	5
FALSE	High	Master Protein	A6B550	Soluble lytic murein transglycosylase OS=Vibrio parahaemolyticus serotype O3:K6 (strain AQ3810) GN=A79_2093 PE=4 SV=1	0	34.807	14.3519	7	9	7	1	648	73.948	9.22	High	High	High		0.741	0.907	113.3	83.9	102.8	7	7	7	0.456	0	26.043	7
FALSE	High	Master Protein	A6B2T4	TrkA-N domain family OS=Vibrio parahaemolyticus serotype O3:K6 (strain AQ3810) GN=A79_2322 PE=4 SV=1	0	34.785	41.3636	6	7	6	1	220	23.775	6.8	High	High	High		0.958	1.027	100.5	96.3	103.2	6	6	6	2.511	0	32.3898	6
FALSE	High	Master Protein	A6B2V7	3-oxoacyl-(Acyl-carrier-protein) reductase, putative OS=Vibrio parahaemolyticus serotype O3:K6 (strain AQ3810) GN=A79_2345 PE=4 SV=1	0	34.7569	25.3112	7	13	7	1	241	25.852	6.43	High	High	High		0.882	1.154	98.8	87.2	114	7	7	7	3.394	0	38.0744	7
FALSE	High	Master Protein	A6BAD1	Cell division protein FtsY (Fragment) OS=Vibrio parahaemolyticus serotype O3:K6 (strain AQ3810) GN=A79_1678 PE=4 SV=1	0	34.7383	34.6939	5	10	1	1	196	21.565	4.51	High	High	High		0.998	1.118	96.3	96.1	107.7	1	1	1	5.31	0	32.1512	5
FALSE	High	Master Protein	A6B6M5	1-acyl-sn-glycerol-3-phosphate acyltransferase OS=Vibrio parahaemolyticus serotype O3:K6 (strain AQ3810) GN=A79_0011 PE=3 SV=1	0	34.6626	19.917	5	11	5	1	241	26.89	9.45	High	High	High		0.931	1.14	97.7	90.9	111.4	5	5	5	2.728	0	32.8675	5
FALSE	High	Master Protein	A6BAC8	Penicillin-binding protein 1B (PBP-1b) (PBP1b) (Murein polymerase) (Fragment) OS=Vibrio parahaemolyticus serotype O3:K6 (strain AQ3810) GN=A79_0757 PE=4 SV=1	0	34.6481	22.5989	8	15	8	1	354	39.166	9.57	High	High	High		0.904	0.776	111.9	101.2	86.8	9	9	9	1.754	0	34.7102	8
FALSE	High	Master Protein	A6B0D5	Pts system, fructose-specific iibc component OS=Vibrio parahaemolyticus serotype O3:K6 (strain AQ3810) GN=A79_2875 PE=4 SV=1	0	34.6187	13.3047	4	8	4	1	466	47.687	6.79	High	High	High		0.679	0.985	112.6	76.5	110.9	4	4	4	1.371	0	32.5184	4
FALSE	High	Master Protein	A6B9G5	Lipopolysaccharide export system protein LptA OS=Vibrio parahaemolyticus serotype O3:K6 (strain AQ3810) GN=yhbN PE=3 SV=1	0	34.581	44.5122	6	8	6	1	164	17.995	7.24	High	High	High		0.607	0.956	117	71	111.9	6	6	6	3.642	0	25.6142	6
FALSE	High	Master Protein	A6B1H7	Methyl-accepting chemotaxis protein OS=Vibrio parahaemolyticus serotype O3:K6 (strain AQ3810) GN=A79_0181 PE=4 SV=1	0	34.564	10.6145	4	13	3	1	537	57.368	4.58	High	High	High		0.979	0.97	101.7	99.6	98.7	3	3	3	0.743	0	43.2946	4
FALSE	High	Master Protein	A6B949	Purine nucleoside phosphorylase OS=Vibrio parahaemolyticus serotype O3:K6 (strain AQ3810) GN=xapA PE=3 SV=1	0	34.5178	18.9781	5	12	5	1	274	29.843	6.02	High	High	High		0.989	1.237	93	91.9	115	5	5	5	3.642	0	36.1629	5
FALSE	High	Master Protein	A6B229	N5-carboxyaminoimidazole ribonucleotide mutase OS=Vibrio parahaemolyticus serotype O3:K6 (strain AQ3810) GN=purE PE=3 SV=1	0	34.339	36.0248	4	13	4	1	161	16.588	6.3	High	High	High		0.942	1.123	97.9	92.2	109.9	4	4	4	3.642	0	56.045	4
FALSE	High	Master Protein	A6B9H4	50S ribosomal protein L24 OS=Vibrio parahaemolyticus serotype O3:K6 (strain AQ3810) GN=rplX PE=3 SV=1	0	34.3032	53.3333	4	9	4	1	105	11.224	10.05	High	High	High		0.231	1.144	126.3	29.1	144.5	4	4	4	9	0	36.0031	4
FALSE	High	Master Protein	A6AYQ6	Anaerobic dimethyl sulfoxide reductase chain A OS=Vibrio parahaemolyticus serotype O3:K6 (strain AQ3810) GN=A79_6135 PE=3 SV=1	0	34.2874	13.6196	9	11	9	1	815	90.812	6.51	High	High	High		0.634	1.122	108.9	69	122.1	8	8	8	0.585	0	20.2975	9
FALSE	High	Master Protein	A6B9Y5	1-deoxy-D-xylulose-5-phosphate synthase OS=Vibrio parahaemolyticus serotype O3:K6 (strain AQ3810) GN=A79_4545 PE=4 SV=1	0	34.2838	19.5349	6	14	6	1	430	47.152	5.99	High	High	High		0.944	0.967	103.1	97.3	99.6	6	6	6	1.404	0	44.2916	6
FALSE	High	Master Protein	A6AZI1	Glycerol uptake facilitator protein GlpF OS=Vibrio parahaemolyticus serotype O3:K6 (strain AQ3810) GN=A79_4291 PE=3 SV=1	0	34.25	10.5634	3	9	3	1	284	29.954	5.26	High	High	High		0.736	1.011	109.2	80.4	110.4	3	3	3	5.813	0	45.0958	3
FALSE	High	Master Protein	A6AZV8	Transcriptional activator HlyU OS=Vibrio parahaemolyticus serotype O3:K6 (strain AQ3810) GN=A79_3182 PE=4 SV=1	0	34.2131	34.4086	2	11	2	1	93	10.604	5.24	High	High	High		0.674	0.868	118	79.6	102.4	3	3	3	6.197	0	31.9638	2
FALSE	High	Master Protein	A6B8K8	Lipopolysaccharide core biosynthesis protein LpsA OS=Vibrio parahaemolyticus serotype O3:K6 (strain AQ3810) GN=A79_0213 PE=4 SV=1	0	34.1367	33.119	9	13	9	1	311	36.885	8.03	High	High	High		1.089	1.053	95.5	104	100.5	9	9	9	1.848	0	40.2574	9
FALSE	High	Master Protein	A6B8L5	ATP-dependent helicase HrpB OS=Vibrio parahaemolyticus serotype O3:K6 (strain AQ3810) GN=hrpB PE=4 SV=1	0	33.976	12.8451	8	9	8	1	833	92.987	6.58	High	High	High		0.99	0.942	102.3	101.3	96.4	8	8	8	0.468	0	26.7433	8
FALSE	High	Master Protein	A6B4T2	Cytochrome c5 OS=Vibrio parahaemolyticus serotype O3:K6 (strain AQ3810) GN=A79_6291 PE=4 SV=1	0	33.9389	32.8467	3	11	3	1	137	14.426	4.77	High	High	High		0.76	0.828	115.9	88.1	96	4	4	4	12.895	0	40.7874	3
FALSE	High	Master Protein	A6AXT7	4-aminobutyrate transaminase OS=Vibrio parahaemolyticus serotype O3:K6 (strain AQ3810) GN=gabT PE=3 SV=1	0	33.9329	21.7494	5	6	5	1	423	45.105	5.71	High	High	High		0.818	1.254	97.7	79.9	122.5	5	5	5	0.738	0	22.7646	5
FALSE	High	Master Protein	A6B342	tRNA (cytidine/uridine-2'-O-)-methyltransferase TrmJ OS=Vibrio parahaemolyticus serotype O3:K6 (strain AQ3810) GN=trmJ PE=4 SV=1	0	33.8475	25.1046	6	15	6	1	239	26.705	5.63	High	High	High		0.806	0.901	110.8	89.3	99.9	7	7	7	3.394	0	41.6142	6
FALSE	High	Master Protein	A6B4E5	tRNA U34 carboxymethyltransferase OS=Vibrio parahaemolyticus serotype O3:K6 (strain AQ3810) GN=cmoB PE=3 SV=1	0	33.8059	25.387	6	12	6	1	323	37.072	6.28	High	High	High		0.715	1.007	110.2	78.8	111	6	6	6	1.154	0	41.6855	6
FALSE	High	Master Protein	A6B8F5	Putative protease La homolog OS=Vibrio parahaemolyticus serotype O3:K6 (strain AQ3810) GN=A79_3931 PE=4 SV=1	0	33.7395	13.578	8	12	8	1	545	60.517	4.93	High	High	High		1.001	0.848	105.3	105.4	89.3	8	8	8	1.276	0	31.3608	8
FALSE	High	Master Protein	A6B4U5	FOG ggdef domain OS=Vibrio parahaemolyticus serotype O3:K6 (strain AQ3810) GN=A79_1374 PE=4 SV=1	0	33.6493	10.4948	5	10	5	1	667	75.967	5.81	High	High	High		0.777	1.05	106.1	82.5	111.4	5	5	5	0.693	0	27.2231	5
FALSE	High	Master Protein	A6B2R3	Flavin prenyltransferase UbiX OS=Vibrio parahaemolyticus serotype O3:K6 (strain AQ3810) GN=ubiX PE=3 SV=1	0	33.5982	26.8868	5	9	5	1	212	22.922	6.79	High	High	High		1.128	0.869	100.1	112.9	87	5	5	5	1.683	0	35.9501	5
FALSE	High	Master Protein	A6B5H3	PhnA protein OS=Vibrio parahaemolyticus serotype O3:K6 (strain AQ3810) GN=A79_4397 PE=4 SV=1	0	33.4827	26.4865	4	7	4	1	185	20.52	5.15	High	High	High		0.623	1.026	113.3	70.5	116.2	5	5	5	1.894	0	26.1677	4
FALSE	High	Master Protein	A6B868	23S rRNA (uracil(1939)-C(5))-methyltransferase RlmD OS=Vibrio parahaemolyticus serotype O3:K6 (strain AQ3810) GN=rumA PE=3 SV=1	0	33.4545	20.9567	8	11	8	1	439	49.006	7.05	High	High	High		0.878	0.968	105.4	92.5	102	8	8	8	1.721	0	31.5603	8
FALSE	High	Master Protein	A6B6K0	30S ribosomal protein S21 OS=Vibrio parahaemolyticus serotype O3:K6 (strain AQ3810) GN=rpsU PE=3 SV=1	0	33.4402	42.2535	4	24	4	1	71	8.482	11.34	High	High	High		0.279	0.973	133.2	37.1	129.6	4	4	4	463.159	0	69.8112	4
FALSE	High	Master Protein	A6B5Q2	Dihydrofolate reductase OS=Vibrio parahaemolyticus serotype O3:K6 (strain AQ3810) GN=folA PE=3 SV=1	0	33.4361	46.25	4	7	4	1	160	17.807	5.05	High	High	High		1.128	0.997	96	108.3	95.7	4	4	4	1.848	0	28.393	4
FALSE	High	Master Protein	A6B6W2	Glucitol operon repressor OS=Vibrio parahaemolyticus serotype O3:K6 (strain AQ3810) GN=A79_5967 PE=4 SV=1	0	33.3423	25.6917	6	7	6	1	253	27.932	5.64	High	High	High		0.785	0.975	108.7	85.3	106	6	6	6	1.929	0	25.7214	6
FALSE	High	Master Protein	A6B4X3	YheO domain protein OS=Vibrio parahaemolyticus serotype O3:K6 (strain AQ3810) GN=A79_3059 PE=4 SV=1	0	33.3245	42.4658	8	11	8	1	219	24.381	7.17	High	High	High		0.815	0.927	109.4	89.1	101.5	8	8	8	3.394	0	33.2452	8
FALSE	High	Master Protein	A6AY26	Alpha/beta superfamily hydrolase OS=Vibrio parahaemolyticus serotype O3:K6 (strain AQ3810) GN=A79_1037 PE=4 SV=1	0	33.2914	34.8684	7	10	7	1	304	32.951	4.83	High	High	High		0.949	0.806	108.9	103.4	87.7	7	7	7	2.162	0	27.0886	7
FALSE	High	Master Protein	A6B7T3	AraC-type DNA-binding domain-containing protein OS=Vibrio parahaemolyticus serotype O3:K6 (strain AQ3810) GN=A79_1158 PE=4 SV=1	0	33.2233	21.3483	5	11	5	1	267	29.853	8.13	High	High	High		0.849	1.074	102.6	87.1	110.2	6	6	6	2.981	0	29.5031	5
FALSE	High	Master Protein	A6B6U9	Flavodoxin OS=Vibrio parahaemolyticus serotype O3:K6 (strain AQ3810) GN=A79_5240 PE=4 SV=1	0	33.204	25.1082	3	4	3	1	231	26.044	4.67	High	High	High		0.91	1.079	100.4	91.3	108.3	4	4	4	1.154	0	22.102	3
FALSE	High	Master Protein	A6B9C1	Sensory box protein OS=Vibrio parahaemolyticus serotype O3:K6 (strain AQ3810) GN=A79_4550 PE=4 SV=1	0	33.1746	15.4348	5	8	2	1	460	52.55	5.9	High	High	High		1.222	1.026	92.3	112.9	94.8	2	2	2	0.957	0	29.4721	5
FALSE	High	Master Protein	A6B174	Thiol-disulfide isomerase OS=Vibrio parahaemolyticus serotype O3:K6 (strain AQ3810) GN=A79_1857 PE=4 SV=1	0	33.1369	38.5714	5	11	5	1	210	23.098	4.83	High	High	High		1.019	0.882	103.4	105.4	91.2	6	6	6	6.943	0	30.799	5
FALSE	High	Master Protein	A6B9H5	50S ribosomal protein L14 OS=Vibrio parahaemolyticus serotype O3:K6 (strain AQ3810) GN=A79_1900 PE=3 SV=1	0	33.0743	51.5152	3	18	3	1	66	7.419	11.21	High	High	High		0.58	1.14	110.3	64	125.7	3	3	3	16.783	0	60.7224	3
FALSE	High	Master Protein	A6B9S9	L-serine dehydratase 1 OS=Vibrio parahaemolyticus serotype O3:K6 (strain AQ3810) GN=A79_5899 PE=4 SV=1	0	33.0497	19.5402	5	14	5	1	261	28.031	5.73	High	High	High		0.66	1.073	109.8	72.4	117.8	5	5	5	2.455	0	50.4984	5
FALSE	High	Master Protein	A6B3H0	Cyclic pyranopterin monophosphate synthase accessory protein OS=Vibrio parahaemolyticus serotype O3:K6 (strain AQ3810) GN=moaC PE=3 SV=1	0	33.0376	33.9623	4	7	4	1	159	17.115	7.09	High	High	High		0.931	0.948	104.2	97	98.8	4	4	4	3.642	0	28.5756	4
FALSE	High	Master Protein	A6B0V5	Proton/glutamate symporter OS=Vibrio parahaemolyticus serotype O3:K6 (strain AQ3810) GN=A79_5418 PE=4 SV=1	0	33.0076	11.9816	3	7	3	1	434	45.403	5.5	High	High	High		0.449	1.541	100.3	45	154.6	3	3	3	0.668	0	34.5362	3
FALSE	High	Master Protein	A6B883	Integration host factor subunit alpha OS=Vibrio parahaemolyticus serotype O3:K6 (strain AQ3810) GN=ihfA PE=3 SV=1	0	32.9946	41.8367	4	11	4	1	98	11.201	9.52	High	High	High		0.238	1.087	129.1	30.7	140.3	4	4	4	9	0	35.3412	4
FALSE	High	Master Protein	A6B998	Protein YciI OS=Vibrio parahaemolyticus serotype O3:K6 (strain AQ3810) GN=A79_3624 PE=4 SV=1	0	32.9501	69.3878	3	7	3	1	98	10.84	4.81	High	High	High		0.381	0.825	136	51.8	112.2	3	3	3	9	0	33.242	3
FALSE	High	Master Protein	A6B8S9	Probable protein kinase UbiB OS=Vibrio parahaemolyticus serotype O3:K6 (strain AQ3810) GN=ubiB PE=3 SV=1	0	32.9497	13.0515	7	13	7	1	544	62.477	6.01	High	High	High		0.855	1.015	104.5	89.4	106.1	7	7	7	0.812	0	36.6524	7
FALSE	High	Master Protein	A6B8V7	Ribosomal RNA small subunit methyltransferase D OS=Vibrio parahaemolyticus serotype O3:K6 (strain AQ3810) GN=A79_1095 PE=3 SV=1	0	32.8535	48.2412	7	9	7	1	199	22.437	8.66	High	High	High		0.98	1.138	96.2	94.3	109.5	7	7	7	3.924	0	26.2956	7
FALSE	High	Master Protein	A6AYW5	Maleylacetoacetate isomerase OS=Vibrio parahaemolyticus serotype O3:K6 (strain AQ3810) GN=maiA PE=3 SV=1	0	32.8158	37.8378	6	11	6	1	222	25.22	4.83	High	High	High		1.139	0.978	96.3	109.6	94.1	6	6	6	3.125	0	35.8541	6
FALSE	High	Master Protein	A6AYJ1	CqsA OS=Vibrio parahaemolyticus serotype O3:K6 (strain AQ3810) GN=A79_1588 PE=4 SV=1	0	32.6913	14.7583	7	12	7	1	393	43.796	6.52	High	High	High		1.361	0.989	89.5	121.9	88.5	7	7	7	2.548	0	26.8121	7
FALSE	High	Master Protein	A6B341	HTH-type transcriptional regulator IscR OS=Vibrio parahaemolyticus serotype O3:K6 (strain AQ3810) GN=iscR PE=3 SV=1	0	32.6739	29.3103	3	5	3	1	174	18.586	7.84	High	High	High		0.554	0.939	120.3	66.7	113	3	3	3	2.162	0	23.0871	3
FALSE	High	Master Protein	A6B809	Ribosomal RNA small subunit methyltransferase J OS=Vibrio parahaemolyticus serotype O3:K6 (strain AQ3810) GN=rsmJ PE=3 SV=1	0	32.6439	36.6795	5	5	5	1	259	28.287	6.65	High	High	High		0.982	1.098	97.4	95.6	107	5	5	5	1.276	0	20.5025	5
FALSE	High	Master Protein	A6B8Z5	N-acetylmuramoyl-L-alanine amidase (Fragment) OS=Vibrio parahaemolyticus serotype O3:K6 (strain AQ3810) GN=A79_2393 PE=4 SV=1	0	32.5505	18.2301	8	8	8	1	565	61.997	9.95	High	High	High		0.746	0.975	110.3	82.3	107.5	8	8	8	0.551	0	21.2455	8
FALSE	High	Master Protein	A6B8B8	HD-GYP domain OS=Vibrio parahaemolyticus serotype O3:K6 (strain AQ3810) GN=A79_1086 PE=4 SV=1	0	32.3528	20.3837	6	8	6	1	417	47.552	7.37	High	High	High		0.943	0.985	102.5	96.6	100.9	6	6	6	1.081	0	29.7745	6
FALSE	High	Master Protein	A6B2Y1	Fumarate reductase subunit D OS=Vibrio parahaemolyticus serotype O3:K6 (strain AQ3810) GN=frdD PE=3 SV=1	0	32.3518	23.2	3	10	3	1	125	13.621	8.24	High	High	High		1.611	0.878	86	138.5	75.5	4	4	4	20.544	0	27.3584	3
FALSE	High	Master Protein	A6AYS2	Uncharacterized protein OS=Vibrio parahaemolyticus serotype O3:K6 (strain AQ3810) GN=A79_6151 PE=4 SV=1	0	32.3139	32.967	7	13	7	1	182	21.846	9.88	High	High	High		0.858	1.019	104.3	89.5	106.2	7	7	7	6.017	0	33.7373	7
FALSE	High	Master Protein	A6AWY4	ScrB OS=Vibrio parahaemolyticus serotype O3:K6 (strain AQ3810) GN=A79_0423 PE=4 SV=1	0	32.2974	25.1613	5	6	5	1	310	34.826	5.29	High	High	High		0.753	1.091	105.5	79.5	115	5	5	5	0.995	0	21.9649	5
FALSE	High	Master Protein	A6AXZ0	Membrane-fusion protein OS=Vibrio parahaemolyticus serotype O3:K6 (strain AQ3810) GN=A79_1001 PE=4 SV=1	0	32.2657	21.1656	7	9	7	1	326	36.047	5.1	High	High	High		0.967	0.839	106.9	103.4	89.7	7	7	7	1.512	0	23.4197	7
FALSE	High	Master Protein	A6BBS3	3-oxoacyl-[acyl-carrier-protein] reductase OS=Vibrio parahaemolyticus serotype O3:K6 (strain AQ3810) GN=A79_0816 PE=4 SV=1	0	32.2612	36.1702	5	33	5	1	141	14.878	4.6	High	High	High		0.431	1.143	116.5	50.3	133.2	6	6	6	11.915	0	95.9619	5
FALSE	High	Master Protein	A6B1F8	Peptide transport system ATP-binding protein SapF OS=Vibrio parahaemolyticus serotype O3:K6 (strain AQ3810) GN=A79_0162 PE=4 SV=1	0	32.2145	33.0769	5	12	5	1	260	29.281	9.01	High	High	High		1.4	1.091	85.9	120.3	93.8	5	5	5	2.511	0	37.2485	5
FALSE	High	Master Protein	A6B377	Allophanate hydrolase subunit 2 OS=Vibrio parahaemolyticus serotype O3:K6 (strain AQ3810) GN=A79_0226 PE=4 SV=1	0	32.1554	17.3633	5	12	5	1	311	33.697	7.74	High	High	High		1.345	0.847	94	126.4	79.6	5	5	5	2.415	0	34.0115	5
FALSE	High	Master Protein	A6B5X1	Transcriptional regulatory protein, C (Fragment) OS=Vibrio parahaemolyticus serotype O3:K6 (strain AQ3810) GN=A79_3582 PE=4 SV=1	0	32.1542	16.5289	6	8	6	1	484	55.242	7.34	High	High	High		1.099	0.947	98.5	108.2	93.3	6	6	6	0.812	0	26.0754	6
FALSE	High	Master Protein	A6B1V0	Putative phosphatase OS=Vibrio parahaemolyticus serotype O3:K6 (strain AQ3810) GN=A79_0079 PE=4 SV=1	0	32.0768	27.1186	4	9	4	1	236	26.255	5.66	High	High	High		0.984	0.927	103.1	101.4	95.5	4	4	4	1.929	0	27.4277	4
FALSE	High	Master Protein	A6B9T2	Glycerate dehydrogenase OS=Vibrio parahaemolyticus serotype O3:K6 (strain AQ3810) GN=A79_0125 PE=3 SV=1	0	32.045	10.9375	3	7	3	1	320	34.873	5.99	High	High	High		1.192	0.968	94.9	113.1	91.9	3	3	3	1.683	0	26.3421	3
FALSE	High	Master Protein	A6B5X4	Phosphoheptose isomerase OS=Vibrio parahaemolyticus serotype O3:K6 (strain AQ3810) GN=gmhA PE=3 SV=1	0	32.0384	27.551	4	7	4	1	196	21.053	5.17	High	High	High		1.327	0.885	93.4	123.9	82.7	4	4	4	3.642	0	28.0856	4
FALSE	High	Master Protein	A6B147	Transcriptional regulator, LysR family OS=Vibrio parahaemolyticus serotype O3:K6 (strain AQ3810) GN=A79_1830 PE=4 SV=1	0	31.9802	20.5479	6	10	6	1	292	33.469	5.31	High	High	High		1.166	0.939	96.6	112.7	90.7	8	8	8	1.955	0	26.5235	6
FALSE	High	Master Protein	A6B304	1-acyl-sn-glycerol-3-phosphate acyltransferase OS=Vibrio parahaemolyticus serotype O3:K6 (strain AQ3810) GN=A79_5046 PE=4 SV=1	0	31.9757	19.0705	8	10	8	1	624	69.337	9.06	High	High	High		1.003	0.958	101.3	101.6	97	8	8	8	1.61	0	20.9238	8
FALSE	High	Master Protein	A6B378	Allophanate hydrolase subunit 1 OS=Vibrio parahaemolyticus serotype O3:K6 (strain AQ3810) GN=A79_0227 PE=4 SV=1	0	31.9624	29.0749	4	7	4	1	227	25.118	4.77	High	High	High		1.336	0.892	92.9	124.1	82.9	4	4	4	2.162	0	30.0622	4
FALSE	High	Master Protein	A6B2Z6	Menaquinone-specific isochorismate synthase OS=Vibrio parahaemolyticus serotype O3:K6 (strain AQ3810) GN=A79_5038 PE=4 SV=1	0	31.9555	16.7816	4	5	4	1	435	48.988	6.98	High	High	High		0.829	0.876	110.9	91.9	97.1	4	4	4	0.509	0	21.0464	4
FALSE	High	Master Protein	A6AX04	Methyl-accepting chemotaxis protein OS=Vibrio parahaemolyticus serotype O3:K6 (strain AQ3810) GN=A79_0443 PE=4 SV=1	0	31.9547	12.5461	6	15	5	1	542	59.057	4.59	High	High	High		0.939	0.967	103.3	96.9	99.8	6	6	6	0.931	0	45.9092	6
FALSE	High	Master Protein	A6B7H7	Glycosyl transferase, family 2 OS=Vibrio parahaemolyticus serotype O3:K6 (strain AQ3810) GN=A79_5536 PE=4 SV=1	0	31.9001	29.771	7	13	7	1	262	29.96	7.09	High	High	High		0.967	0.961	102.4	99.1	98.5	8	8	8	2.384	0	36.631	7
FALSE	High	Master Protein	A6B0X5	Serine/threonine transporter SstT OS=Vibrio parahaemolyticus serotype O3:K6 (strain AQ3810) GN=sstT PE=3 SV=1	0	31.8698	6.17284	2	8	2	1	405	42.279	7.03	High	High	High		0.936	0.938	104.4	97.7	97.9	2	2	2	3.217	0	26.1916	2
FALSE	High	Master Protein	A6B1U3	Glycerate kinase 1 OS=Vibrio parahaemolyticus serotype O3:K6 (strain AQ3810) GN=A79_5918 PE=3 SV=1	0	31.8576	17.7249	5	9	5	1	378	38.901	4.89	High	High	High		0.846	0.929	108.1	91.4	100.4	5	5	5	1.738	0	30.8917	5
FALSE	High	Master Protein	A6AZZ1	Cytochrome c biogenesis ATP-binding export protein CcmA OS=Vibrio parahaemolyticus serotype O3:K6 (strain AQ3810) GN=ccmA PE=3 SV=1	0	31.8552	40.9756	7	9	7	1	205	23.098	5.67	High	High	High		1.186	0.943	95.9	113.7	90.4	7	7	7	4.337	0	25.1824	7
FALSE	High	Master Protein	A6B8F3	Uncharacterized protein OS=Vibrio parahaemolyticus serotype O3:K6 (strain AQ3810) GN=A79_3929 PE=4 SV=1	0	31.8255	41.4634	3	7	3	1	82	9.391	10.2	High	High	High		0.776	0.999	108.1	83.9	108	3	3	3	16.783	0	31.0107	3
FALSE	High	Master Protein	A6B4V5	Putative outer membrane protein OS=Vibrio parahaemolyticus serotype O3:K6 (strain AQ3810) GN=A79_1384 PE=4 SV=1	0	31.7051	12.5654	2	10	2	1	191	21.443	4.68	High	High	High		1.084	1	97.3	105.4	97.3	4	4	4	9	0	24.6107	2
FALSE	High	Master Protein	A6B2L6	tRNA guanosine-2'-O-methyltransferase OS=Vibrio parahaemolyticus serotype O3:K6 (strain AQ3810) GN=A79_0057 PE=4 SV=1	0	31.5992	29.4372	5	7	5	1	231	26.023	6.62	High	High	High		0.598	0.671	132.2	79.1	88.7	5	5	5	1.683	0	27.2735	5
FALSE	High	Master Protein	A6BAY9	Sulfate permease family protein (Fragment) OS=Vibrio parahaemolyticus serotype O3:K6 (strain AQ3810) GN=A79_0362 PE=4 SV=1	0	31.5887	17.0732	3	6	1	1	246	26.455	6.16	High	High	High		0.722	0.782	119.8	86.5	93.7	1	1	1	1.424	0	27.143	3
FALSE	High	Master Protein	A6B799	Thiamine-phosphate pyrophosphorylase OS=Vibrio parahaemolyticus serotype O3:K6 (strain AQ3810) GN=A79_2778 PE=4 SV=1	0	31.5667	18.9573	6	10	6	1	422	46.885	4.75	High	High	High		0.714	0.952	112.5	80.4	107.1	7	7	7	1.228	0	26.774	6
FALSE	High	Master Protein	A6AYT9	Sensor histidine kinase OS=Vibrio parahaemolyticus serotype O3:K6 (strain AQ3810) GN=A79_6168 PE=4 SV=1	0	31.5422	19.3258	7	8	7	1	445	49.912	7.37	High	High	High		1.221	0.926	95.3	116.4	88.3	7	7	7	0.905	0	28.1811	7
FALSE	High	Master Protein	A6B7U8	Uncharacterized protein OS=Vibrio parahaemolyticus serotype O3:K6 (strain AQ3810) GN=A79_2268 PE=4 SV=1	0	31.3786	26.0417	4	16	4	1	192	21.161	5.03	High	High	High		1.542	1.046	83.6	128.9	87.5	4	4	4	3.642	0	55.2523	4
FALSE	High	Master Protein	A6B646	Thioredoxin OS=Vibrio parahaemolyticus serotype O3:K6 (strain AQ3810) GN=trx PE=3 SV=1	0	31.3783	25.9259	2	10	2	1	108	11.708	4.75	High	High	High		0.237	0.851	143.7	34	122.3	4	4	4	4.179	0	41.3571	2
FALSE	High	Master Protein	A6B607	Transcriptional regulator OS=Vibrio parahaemolyticus serotype O3:K6 (strain AQ3810) GN=A79_3912 PE=4 SV=1	0	31.3588	16.2939	4	8	4	1	313	35.439	5.54	High	High	High		1.227	1.01	92.7	113.7	93.6	4	4	4	1.069	0	26.0003	4
FALSE	High	Master Protein	A6B6G6	Uncharacterized protein OS=Vibrio parahaemolyticus serotype O3:K6 (strain AQ3810) GN=A79_5667 PE=4 SV=1	0	31.3292	22.293	3	11	3	1	157	18.898	4.94	High	High	High		0.876	0.909	107.7	94.4	97.9	4	4	4	6.197	0	37.7722	3
FALSE	High	Master Protein	A6B3S1	Histidinol dehydrogenase OS=Vibrio parahaemolyticus serotype O3:K6 (strain AQ3810) GN=hisD PE=3 SV=1	0	31.2302	21.5777	6	10	6	1	431	46.07	5.53	High	High	High		0.749	1.052	107.1	80.2	112.7	6	6	6	1.448	0	29.2344	6
FALSE	High	Master Protein	A6AXT9	Cyclic diguanylate phosphodiesterase (EAL) domain protein OS=Vibrio parahaemolyticus serotype O3:K6 (strain AQ3810) GN=A79_0949 PE=4 SV=1	0	31.2	15.1394	7	11	7	1	502	56.806	5.08	High	High	High		0.956	0.923	104.2	99.6	96.2	7	7	7	1.031	0	34.5964	7
FALSE	High	Master Protein	A6B6N1	Toluene tolerance protein Ttg2B OS=Vibrio parahaemolyticus serotype O3:K6 (strain AQ3810) GN=A79_0017 PE=3 SV=1	0	31.1473	15.5894	3	8	3	1	263	27.912	7.99	High	High	High		1.056	0.976	99	104.5	96.5	3	3	3	2.511	0	26.0492	3
FALSE	High	Master Protein	A6BAA6	Thiol:disulfide interchange protein DsbD (Fragment) OS=Vibrio parahaemolyticus serotype O3:K6 (strain AQ3810) GN=A79_0207 PE=4 SV=1	0	31.1232	13.6476	4	8	4	1	403	43.773	7.14	High	High	High		1.109	1.015	96	106.5	97.5	4	4	4	1.276	0	35.3404	4
FALSE	High	Master Protein	A6B5S4	Glutathione-regulated potassium-efflux system protein KefC (K(+)/H(+)antiporter) OS=Vibrio parahaemolyticus serotype O3:K6 (strain AQ3810) GN=A79_2201 PE=3 SV=1	0	31.0966	13.4969	7	9	7	1	652	71.368	5.71	High	High	High		0.898	0.883	107.9	96.9	95.3	7	7	7	1.683	0	23.2879	7
FALSE	High	Master Protein	A6B4L8	Uncharacterized protein OS=Vibrio parahaemolyticus serotype O3:K6 (strain AQ3810) GN=A79_5075 PE=4 SV=1	0	31.0278	22.7106	7	9	7	1	273	31.446	6.92	High	High	High		0.914	1.02	102.3	93.4	104.3	7	7	7	2.162	0	28.7306	7
FALSE	High	Master Protein	A6B596	AsmA family (Fragment) OS=Vibrio parahaemolyticus serotype O3:K6 (strain AQ3810) GN=A79_3244 PE=4 SV=1	0	31.015	15.0134	4	7	2	1	373	41.21	4.55	High	High	High		1.205	0.953	95	114.5	90.5	2	2	2	2.511	0	23.8703	4
FALSE	High	Master Protein	A6AZJ9	Beta-galactosidase OS=Vibrio parahaemolyticus serotype O3:K6 (strain AQ3810) GN=A79_4309 PE=3 SV=1	0	30.9964	6.10465	6	8	6	1	1032	119.01	5.24	High	High	High		0.936	1.186	96.1	90	113.9	6	6	6	0.355	0	26.4198	6
FALSE	High	Master Protein	A6BB20	DnaK suppressor protein (Fragment) OS=Vibrio parahaemolyticus serotype O3:K6 (strain AQ3810) GN=A79_2404 PE=4 SV=1	0	30.9917	40.2597	2	34	2	1	77	9.011	5.63	High	High	High		0.687	0.953	113.6	78	108.3	2	2	2	9	0	113.041	2
FALSE	High	Master Protein	A6B1N5	Maltose O-acetyltransferase OS=Vibrio parahaemolyticus serotype O3:K6 (strain AQ3810) GN=A79_6016 PE=4 SV=1	0	30.9072	21.7391	4	8	4	1	184	20.408	5.25	High	High	High		0.835	0.909	109.3	91.3	99.4	4	4	4	2.981	0	27.8947	4
FALSE	High	Master Protein	A6B8F4	Macrodomain Ter protein OS=Vibrio parahaemolyticus serotype O3:K6 (strain AQ3810) GN=matP PE=3 SV=1	0	30.9059	30.8725	4	8	4	1	149	17.457	8.66	High	High	High		0.907	1.068	100.8	91.4	107.7	4	4	4	3.217	0	29.3279	4
FALSE	High	Master Protein	A6B5A0	Uncharacterized protein OS=Vibrio parahaemolyticus serotype O3:K6 (strain AQ3810) GN=A79_3247 PE=4 SV=1	0	30.8983	25.3521	5	9	5	1	213	24.177	4.94	High	High	High		1.14	1.014	95.1	108.4	96.4	5	5	5	2.831	0	31.3786	5
FALSE	High	Master Protein	A6B7B7	Uncharacterized protein OS=Vibrio parahaemolyticus serotype O3:K6 (strain AQ3810) GN=A79_2721 PE=4 SV=1	0	30.874	40.7407	6	9	6	1	162	19.062	6.79	High	High	High		1.139	0.849	100.4	114.4	85.2	6	6	6	4.012	0	29.112	6
FALSE	High	Master Protein	A6B7X0	Uncharacterized protein OS=Vibrio parahaemolyticus serotype O3:K6 (strain AQ3810) GN=A79_2007 PE=4 SV=1	0	30.8523	40.404	3	9	3	1	99	11.25	5.99	High	High	High		0.359	0.721	144.2	51.8	104	3	3	3	14.849	0	36.056	3
FALSE	High	Master Protein	A6B892	DNA polymerase III, delta subunit (Fragment) OS=Vibrio parahaemolyticus serotype O3:K6 (strain AQ3810) GN=holA PE=4 SV=1	0	30.8211	35.5856	6	10	6	1	222	25.462	6.34	High	High	High		0.947	1.024	101	95.6	103.4	6	6	6	2.455	0	35.5674	6
FALSE	High	Master Protein	A6AYU8	Putative transcriptional regulator, LysR family OS=Vibrio parahaemolyticus serotype O3:K6 (strain AQ3810) GN=A79_6177 PE=4 SV=1	0	30.7311	20.0669	5	7	5	1	299	33.735	6.76	High	High	High		1.361	1.058	87.7	119.4	92.8	5	5	5	1.581	0	22.0356	5
FALSE	High	Master Protein	A6BAX6	Ribulose-phosphate 3-epimerase (Fragment) OS=Vibrio parahaemolyticus serotype O3:K6 (strain AQ3810) GN=rpe PE=4 SV=1	0	30.5941	69.2308	4	11	4	1	65	7.249	4.77	High	High	High		0.998	0.875	104.4	104.2	91.4	5	5	5	14.849	0	38.3917	4
FALSE	High	Master Protein	A6B7T8	Transcriptional regulator, LysR family OS=Vibrio parahaemolyticus serotype O3:K6 (strain AQ3810) GN=A79_1164 PE=4 SV=1	0	30.4969	15.142	4	6	4	1	317	36.77	6.7	High	High	High		1.123	1.089	93.4	104.9	101.7	4	4	4	1.512	0	21.5232	4
FALSE	High	Master Protein	A6B161	ABC transporter ATP-binding protein OS=Vibrio parahaemolyticus serotype O3:K6 (strain AQ3810) GN=A79_1844 PE=4 SV=1	0	30.4415	31.6456	6	9	6	1	237	26.363	5.86	High	High	High		1.258	0.896	95.1	119.6	85.2	6	6	6	2.831	0	28.8	6
FALSE	High	Master Protein	A6B535	Ubiquinol-Cytochrome c reductase, iron-sulfur subunit OS=Vibrio parahaemolyticus serotype O3:K6 (strain AQ3810) GN=A79_5782 PE=4 SV=1	0	30.3739	36.8421	6	12	6	1	209	24.187	6.58	High	High	High		1.034	1.047	97.4	100.6	102	6	6	6	3.125	0	33.2511	6
FALSE	High	Master Protein	A6B9L2	Electron transport complex protein RnfC (Fragment) OS=Vibrio parahaemolyticus serotype O3:K6 (strain AQ3810) GN=A79_3323 PE=3 SV=1	0	30.3606	32.5	5	7	5	1	280	29.975	5.26	High	High	High		0.935	1.041	100.8	94.2	105	5	5	5	1.512	0	28.0134	5
FALSE	High	Master Protein	A6BCD4	Para-aminobenzoate synthase component 1 (Fragment) OS=Vibrio parahaemolyticus serotype O3:K6 (strain AQ3810) GN=A79_2358 PE=4 SV=1	0	30.3299	53.3898	7	11	3	1	118	12.86	7.02	High	High	High		0.918	0.944	104.8	96.2	98.9	3	3	3	6.743	0	31.8691	7
FALSE	High	Master Protein	A6B1Q2	Enoyl-CoA hydratase/carnithine racemase OS=Vibrio parahaemolyticus serotype O3:K6 (strain AQ3810) GN=A79_5276 PE=4 SV=1	0	30.3261	20.6587	6	11	6	1	334	36.662	5.07	High	High	High		1.03	0.88	103.1	106.2	90.7	6	6	6	2.162	0	30.1295	6
FALSE	High	Master Protein	A6B769	Ribonuclease HII OS=Vibrio parahaemolyticus serotype O3:K6 (strain AQ3810) GN=rnhB PE=3 SV=1	0	30.3163	35.0711	5	7	5	1	211	23.072	6.93	High	High	High		0.657	1.066	110.2	72.4	117.4	5	5	5	1.894	0	24.5305	5
FALSE	High	Master Protein	A6B8M3	Transport-associated OS=Vibrio parahaemolyticus serotype O3:K6 (strain AQ3810) GN=A79_5079 PE=4 SV=1	0	30.1631	34.9727	6	10	6	1	183	19.575	4.46	High	High	High		0.223	0.405	184.3	41.1	74.6	6	6	6	4.337	0	31.2227	6
FALSE	High	Master Protein	A6B051	Phosphoribosylglycinamide formyltransferase OS=Vibrio parahaemolyticus serotype O3:K6 (strain AQ3810) GN=purN PE=3 SV=1	0	30.1354	32.5581	7	14	7	1	215	23.735	5.54	High	High	High		1.036	0.932	101.1	104.7	94.2	7	7	7	3.642	0	36.0672	7
FALSE	High	Master Protein	A6B5X3	21 kDa hemolysin OS=Vibrio parahaemolyticus serotype O3:K6 (strain AQ3810) GN=A79_1311 PE=4 SV=1	0	30.1099	23.1441	5	10	5	1	229	24.847	5.15	High	High	High		1.187	1.024	93.4	110.9	95.6	5	5	5	3.125	0	28.286	5
FALSE	High	Master Protein	A6B4R4	Putative transport protein (Fragment) OS=Vibrio parahaemolyticus serotype O3:K6 (strain AQ3810) GN=A79_1935 PE=3 SV=1	0	30.0126	14.7005	7	10	7	1	551	59.462	7.52	High	High	High		1.056	1.009	97.9	103.4	98.8	7	7	7	1.228	0	28.7716	7
FALSE	High	Master Protein	A6AZG6	ThiF family protein OS=Vibrio parahaemolyticus serotype O3:K6 (strain AQ3810) GN=A79_4276 PE=4 SV=1	0	29.9861	18.2156	3	6	3	1	269	29.312	8.34	High	High	High		0.879	0.966	105.4	92.7	101.9	3	3	3	0.719	0	27.0542	3
FALSE	High	Master Protein	A6B7Q2	Short-chain dehydrogenase/reductase SDR OS=Vibrio parahaemolyticus serotype O3:K6 (strain AQ3810) GN=A79_5576 PE=1 SV=1	0	29.9366	24.4344	4	9	4	1	221	23.873	5.22	High	High	High		0.952	0.909	104.9	99.8	95.3	4	4	4	4.995	0	28.1001	4
FALSE	High	Master Protein	A6AY77	Phosphoglycerate transport system transcriptional regulatory protein PgtA OS=Vibrio parahaemolyticus serotype O3:K6 (strain AQ3810) GN=A79_1473 PE=4 SV=1	0	29.8602	13.981	5	6	5	1	422	47.712	6.35	High	High	High		1	0.917	102.8	102.8	94.3	5	5	5	0.931	0	20.4517	5
FALSE	High	Master Protein	A6B268	Uncharacterized protein OS=Vibrio parahaemolyticus serotype O3:K6 (strain AQ3810) GN=A79_2570 PE=4 SV=1	0	29.8598	27	2	5	2	1	100	11.615	9.07	High	High	High		0.622	1.168	107.6	66.9	125.6	2	2	2	5.31	0	23.1663	2
FALSE	High	Master Protein	A6B2C0	Spermidine/putrescine ABC transporter, periplasmic spermidine/putrescine-binding protein (Fragment) OS=Vibrio parahaemolyticus serotype O3:K6 (strain AQ3810) GN=A79_5132 PE=4 SV=1	0	29.824	19.0332	6	9	6	1	331	37.02	4.83	High	High	High		0.845	1.171	99.5	84	116.5	6	6	6	1.581	0	20.3854	6
FALSE	High	Master Protein	A6B1Q5	3-oxoacyl-[acyl-carrier-protein] reductase OS=Vibrio parahaemolyticus serotype O3:K6 (strain AQ3810) GN=A79_5279 PE=4 SV=1	0	29.7855	28.5714	6	9	5	1	252	26.718	5.15	High	High	High		1.219	0.962	94.3	115	90.7	6	6	6	2.162	1	29.9304	6
FALSE	High	Master Protein	A6B736	Outer membrane efflux family protein OS=Vibrio parahaemolyticus serotype O3:K6 (strain AQ3810) GN=A79_5704 PE=4 SV=1	0	29.7269	10.0548	5	9	5	1	547	61.08	5	High	High	High		1.191	0.927	96.2	114.6	89.2	5	5	5	0.738	0	33.7366	5
FALSE	High	Master Protein	A6AWU9	Uncharacterized protein OS=Vibrio parahaemolyticus serotype O3:K6 (strain AQ3810) GN=A79_0388 PE=4 SV=1	0	29.7153	20.6751	5	9	5	1	237	27.809	5.55	High	High	High		1.014	0.925	102.1	103.5	94.5	5	5	5	1.683	0	24.6633	5
FALSE	High	Master Protein	A6B427	Acriflavin resistance plasma membrane protein OS=Vibrio parahaemolyticus serotype O3:K6 (strain AQ3810) GN=A79_5351 PE=3 SV=1	0	29.7055	9.10834	8	10	8	1	1043	114.559	4.96	High	High	High		1.259	0.966	93	117.1	89.8	8	8	8	0.456	0	28.1366	8
FALSE	High	Master Protein	A6AZ41	Diguanylate cyclase OS=Vibrio parahaemolyticus serotype O3:K6 (strain AQ3810) GN=A79_4453 PE=4 SV=1	0	29.697	46.8966	4	6	4	1	145	17.087	7.5	High	High	High		1.389	0.95	89.9	124.8	85.3	4	4	4	3.217	0	23.6788	4
FALSE	High	Master Protein	A6B3K2	Signal transduction histidine kinase regulating C4-dicarboxylate transport system OS=Vibrio parahaemolyticus serotype O3:K6 (strain AQ3810) GN=A79_2499 PE=4 SV=1	0	29.68	13.1494	7	8	7	1	616	68.822	6.43	High	High	High		1.037	0.939	100.8	104.5	94.7	7	7	7	0.682	0	25.5768	7
FALSE	High	Master Protein	A6B4Q5	Nucleoside-diphosphate-sugar epimerase OS=Vibrio parahaemolyticus serotype O3:K6 (strain AQ3810) GN=A79_1925 PE=4 SV=1	0	29.6158	15.2439	6	10	6	1	492	55.101	6.55	High	High	High		1.135	0.944	97.4	110.6	92	6	6	6	0.978	0	25.0354	6
FALSE	High	Master Protein	A6B129	Lipoprotein releasing system, transmembrane protein LolE OS=Vibrio parahaemolyticus serotype O3:K6 (strain AQ3810) GN=lolE PE=3 SV=1	0	29.6135	14.7343	7	11	7	1	414	44.953	9.32	High	High	High		1.065	0.984	98.4	104.8	96.8	7	7	7	1.976	0	27.3479	7
FALSE	High	Master Protein	A6B552	Cyclic diguanosine monophosphate-binding protein OS=Vibrio parahaemolyticus serotype O3:K6 (strain AQ3810) GN=A79_2095 PE=4 SV=1	0	29.4677	31.9672	3	9	3	1	122	13.883	5.08	High	High	High		1.015	0.902	102.9	104.4	92.8	4	4	4	55.234	0	31.0715	3
FALSE	High	Master Protein	A6B0X1	Sco1-related protein OS=Vibrio parahaemolyticus serotype O3:K6 (strain AQ3810) GN=A79_5434 PE=4 SV=1	0	29.4575	15.6863	3	7	3	1	204	22.7	5.25	High	High	High		0.98	0.94	102.7	100.7	96.5	3	3	3	2.162	0	27.7595	3
FALSE	High	Master Protein	A6B348	S-adenosylmethionine:tRNA ribosyltransferase-isomerase OS=Vibrio parahaemolyticus serotype O3:K6 (strain AQ3810) GN=queA PE=3 SV=1	0	29.4116	22.8571	5	7	5	1	350	39.119	5.31	High	High	High		0.838	1.1	102.1	85.6	112.3	6	6	6	1.512	0	26.0188	5
FALSE	High	Master Protein	A6B2L7	ATP-dependent DNA helicase RecG OS=Vibrio parahaemolyticus serotype O3:K6 (strain AQ3810) GN=recG PE=3 SV=1	0	29.3117	9.52381	8	15	8	1	693	76.675	7.96	High	High	High		1.044	0.997	98.7	103	98.4	8	8	8	0.73	0	27.0863	8
FALSE	High	Master Protein	A6B6N0	ABC-type transport system, periplasmic component OS=Vibrio parahaemolyticus serotype O3:K6 (strain AQ3810) GN=A79_0016 PE=4 SV=1	0	29.2729	33.3333	5	6	5	1	162	17.25	4.46	High	High	High		1.203	1.212	87.9	105.7	106.5	5	5	5	9	0	23.2899	5
FALSE	High	Master Protein	A6B6L3	Ggdef family protein OS=Vibrio parahaemolyticus serotype O3:K6 (strain AQ3810) GN=A79_4187 PE=4 SV=1	0	29.0495	21.3483	6	6	6	1	445	50.671	6.84	High	High	High		1.45	0.989	87.2	126.5	86.3	6	6	6	0.823	0	18.6636	6
FALSE	High	Master Protein	A6AY93	Pts system fructose-specific eiibc component (Eiibc-fru) OS=Vibrio parahaemolyticus serotype O3:K6 (strain AQ3810) GN=A79_1489 PE=4 SV=1	0	28.8584	12.305	4	4	4	1	577	59.044	6.34	High	High	High		0.727	1.219	101.8	74	124.2	4	4	4	0.719	0	20.6524	4
FALSE	High	Master Protein	A6B4T4	Transcriptional regulator, TetR family OS=Vibrio parahaemolyticus serotype O3:K6 (strain AQ3810) GN=A79_6293 PE=4 SV=1	0	28.8155	24.5098	4	5	4	1	204	22.86	5.31	High	High	High		0.813	0.949	108.6	88.3	103.1	4	4	4	1.424	0	20.8732	4
FALSE	High	Master Protein	A6B7W4	AAA ATPase OS=Vibrio parahaemolyticus serotype O3:K6 (strain AQ3810) GN=A79_1143 PE=4 SV=1	0	28.7731	5.36232	5	8	5	1	1380	152.717	3.75	High	High	High		0.837	1.038	104.4	87.3	108.3	5	5	5	0.52	0	24.4899	5
FALSE	High	Master Protein	A6B253	NAD kinase OS=Vibrio parahaemolyticus serotype O3:K6 (strain AQ3810) GN=nadK PE=3 SV=1	0	28.7042	19.3878	6	9	6	1	294	32.295	6.18	High	High	High		1.001	0.932	102.3	102.4	95.3	6	6	6	2.981	0	20.3951	6
FALSE	High	Master Protein	A6B532	FOG EAL domain OS=Vibrio parahaemolyticus serotype O3:K6 (strain AQ3810) GN=A79_5779 PE=4 SV=1	0	28.6401	14.1304	9	9	9	1	828	93.805	6.29	High	High	High		1	0.936	102.2	102.2	95.7	8	8	8	0.585	0	22.8794	9
FALSE	High	Master Protein	A6B7D5	3-demethylubiquinone-9 3-methyltransferase OS=Vibrio parahaemolyticus serotype O3:K6 (strain AQ3810) GN=ubiG PE=4 SV=1	0	28.518	36.25	6	10	6	1	160	17.88	6.33	High	High	High		0.719	0.907	114.3	82.1	103.6	7	7	7	6.943	0	25.4323	6
FALSE	High	Master Protein	A6B0E6	ADP-ribose pyrophosphatase OS=Vibrio parahaemolyticus serotype O3:K6 (strain AQ3810) GN=A79_2886 PE=4 SV=1	0	28.472	35.6846	7	10	7	1	241	27.3	7.42	High	High	High		1.164	0.969	95.8	111.5	92.8	7	7	7	2.981	0	32.3771	7
FALSE	High	Master Protein	A6B0G3	3,4-dihydroxy-2-butanone 4-phosphate synthase OS=Vibrio parahaemolyticus serotype O3:K6 (strain AQ3810) GN=ribB PE=3 SV=1	0	28.3926	27.5229	5	8	5	1	218	23.534	5.07	High	High	High		0.846	0.729	116.5	98.6	85	5	5	5	1.894	0	27.432	5
FALSE	High	Master Protein	A6B2M9	Fe/S biogenesis protein NfuA OS=Vibrio parahaemolyticus serotype O3:K6 (strain AQ3810) GN=nfuA PE=3 SV=1	0	28.3901	19.0722	3	6	3	1	194	20.936	4.5	High	High	High		0.848	0.983	105.9	89.9	104.2	3	3	3	5.813	0	20.3945	3
FALSE	High	Master Protein	A6B0S1	Protein of avirulence locus OS=Vibrio parahaemolyticus serotype O3:K6 (strain AQ3810) GN=A79_3497 PE=4 SV=1	0	28.375	18.1132	3	5	3	1	265	29.48	4.56	High	High	High		0.452	0.812	132.5	59.9	107.6	3	3	3	1.61	0	18.4981	3
FALSE	High	Master Protein	A6B8N8	tRNA (uracil(54)-C(5))-methyltransferase (Fragment) OS=Vibrio parahaemolyticus serotype O3:K6 (strain AQ3810) GN=trmA PE=3 SV=1	0	28.3454	22.956	6	9	6	1	318	36.833	5.06	High	High	High		0.793	1.004	107.2	85.1	107.7	6	6	6	1.239	0	29.9284	6
FALSE	High	Master Protein	A6AZV2	Uncharacterized protein OS=Vibrio parahaemolyticus serotype O3:K6 (strain AQ3810) GN=A79_3176 PE=4 SV=1	0	28.2673	17.2414	3	9	3	1	145	16.78	4.7	High	High	High		0.723	0.941	112.6	81.4	105.9	3	3	3	16.783	0	39.4393	3
FALSE	High	Master Protein	A6B556	Beta-hexosaminidase OS=Vibrio parahaemolyticus serotype O3:K6 (strain AQ3810) GN=nagZ PE=3 SV=1	0	28.2144	30.8869	8	9	8	1	327	36.035	5.43	High	High	High		0.907	0.955	104.8	95.1	100.1	8	8	8	1.818	0	23.5879	8
FALSE	High	Master Protein	A6BAN4	Tetratricopeptide repeat domain protein (Fragment) OS=Vibrio parahaemolyticus serotype O3:K6 (strain AQ3810) GN=A79_2514 PE=4 SV=1	0	28.1691	14.4654	5	8	5	1	318	34.93	5.83	High	High	High		1.162	1.007	94.7	110	95.3	5	5	5	1.683	0	24.7219	5
FALSE	High	Master Protein	A6B6V1	Thiol:disulfide interchange protein DsbC OS=Vibrio parahaemolyticus serotype O3:K6 (strain AQ3810) GN=A79_5242 PE=4 SV=1	0	28.1028	21.7557	4	7	4	1	262	28.63	5.45	High	High	High		0.728	1.052	107.9	78.6	113.5	5	5	5	1.276	0	32.199	4
FALSE	High	Master Protein	A6B4R1	PsrA protein OS=Vibrio parahaemolyticus serotype O3:K6 (strain AQ3810) GN=A79_1932 PE=4 SV=1	0	28.0369	25	4	9	4	1	208	23.533	6.35	High	High	High		0.851	0.89	109.4	93.1	97.4	5	5	5	2.162	0	24.739	4
FALSE	High	Master Protein	A6BCI2	P pilus assembly/Cpx signaling pathway, periplasmic inhibitor/zinc-resistance associated protein (Fragment) OS=Vibrio parahaemolyticus serotype O3:K6 (strain AQ3810) GN=A79_5620 PE=4 SV=1	0	27.9912	27.2109	3	7	3	1	147	17.118	8.82	High	High	High		0.742	1.904	82.3	61.1	156.6	5	5	5	4.623	0	22.0955	3
FALSE	High	Master Protein	A6AZH2	RecBCD enzyme subunit RecB OS=Vibrio parahaemolyticus serotype O3:K6 (strain AQ3810) GN=recB PE=3 SV=1	0	27.7614	7.09046	7	8	7	1	1227	137.753	5.12	High	High	High		0.922	0.837	108.7	100.3	91	7	7	7	0.251	0	24.1552	7
FALSE	High	Master Protein	A6B7X6	Holliday junction ATP-dependent DNA helicase RuvA OS=Vibrio parahaemolyticus serotype O3:K6 (strain AQ3810) GN=ruvA PE=3 SV=1	0	27.7473	18.6275	3	7	3	1	204	22.123	5.27	High	High	High		0.816	1.061	104.3	85.1	110.6	3	3	3	2.162	0	24.8996	3
FALSE	High	Master Protein	A6B999	Uncharacterized protein OS=Vibrio parahaemolyticus serotype O3:K6 (strain AQ3810) GN=A79_3625 PE=4 SV=1	0	27.7361	19.2308	2	8	2	1	130	14.402	8.47	High	High	High		1.1	0.922	99.3	109.2	91.5	2	2	2	5.813	0	32.2184	2
FALSE	High	Master Protein	A6B3G5	Oligopeptide permease ABC transporter membrane component OS=Vibrio parahaemolyticus serotype O3:K6 (strain AQ3810) GN=A79_1187 PE=3 SV=1	0	27.7055	10.4575	2	9	2	1	306	33.931	9.39	High	High	High		0.883	0.849	109.8	97	93.2	2	2	2	1.783	0	34.6597	2
FALSE	High	Master Protein	A6B3T6	30S ribosomal protein S15 OS=Vibrio parahaemolyticus serotype O3:K6 (strain AQ3810) GN=rpsO PE=3 SV=1	0	27.6974	40.4494	1	4	1	1	89	10.057	10.33	High	High	High		0.323	1.124	122.6	39.6	137.8	1	1	1	1.512	0	30.5843	1
FALSE	High	Master Protein	A6B9C5	Zn-dependent enzyme from deacylase/carboxypeptidase superfamily OS=Vibrio parahaemolyticus serotype O3:K6 (strain AQ3810) GN=A79_3814 PE=4 SV=1	0	27.6902	29.8361	5	5	5	1	305	33.544	4.74	High	High	High		0.642	1.009	113.2	72.6	114.2	5	5	5	1.154	0	21.5072	5
FALSE	High	Master Protein	A6BAD0	Cytochrome D ubiquinol oxidase subunit 2 (Fragment) OS=Vibrio parahaemolyticus serotype O3:K6 (strain AQ3810) GN=A79_5825 PE=4 SV=1	0	27.5752	7.44681	2	10	2	1	188	20.559	5.45	High	High	High		1.586	0.983	84	133.3	82.6	4	4	4	38.811	0	30.1724	2
FALSE	High	Master Protein	A6B8Y7	Putative transcriptional regulator OS=Vibrio parahaemolyticus serotype O3:K6 (strain AQ3810) GN=A79_2524 PE=4 SV=1	0	27.4877	21.6374	3	8	3	1	171	19.376	5.58	High	High	High		0.975	1.006	100.6	98.1	101.3	3	3	3	2.162	0	31.4332	3
FALSE	High	Master Protein	A6AYA0	Transcriptional regulator, HTH_3 family OS=Vibrio parahaemolyticus serotype O3:K6 (strain AQ3810) GN=A79_1496 PE=4 SV=1	0	27.4409	22.7053	5	7	5	1	207	23.769	5.5	High	High	High		0.507	0.777	131.4	66.6	102.1	5	5	5	9	0	22.6307	5
FALSE	High	Master Protein	A6AWY5	ScrC OS=Vibrio parahaemolyticus serotype O3:K6 (strain AQ3810) GN=A79_0424 PE=4 SV=1	0	27.4205	11.2403	8	12	8	1	774	88.121	5.63	High	High	High		0.908	0.896	107	97.2	95.9	8	8	8	0.604	0	29.2298	8
FALSE	High	Master Protein	A6AY25	Alpha/beta superfamily hydrolase OS=Vibrio parahaemolyticus serotype O3:K6 (strain AQ3810) GN=A79_1036 PE=4 SV=1	0	27.3919	20.1923	5	6	5	1	312	34.336	5.33	High	High	High		1.16	0.937	96.9	112.4	90.8	5	5	5	0.995	0	17.908	5
FALSE	High	Master Protein	A6B875	LexA repressor (Fragment) OS=Vibrio parahaemolyticus serotype O3:K6 (strain AQ3810) GN=lexA PE=3 SV=1	0	27.3807	34.4156	6	7	6	1	154	16.857	5.38	High	High	High		0.638	1.058	111.3	71	117.7	6	6	6	6.499	0	21.155	6
FALSE	High	Master Protein	A6B8T6	Branched-chain amino acid aminotransferase OS=Vibrio parahaemolyticus serotype O3:K6 (strain AQ3810) GN=ilvE PE=3 SV=1	0	27.2167	20.8333	5	8	5	1	312	34.277	5.31	High	High	High		0.9	0.955	105.1	94.6	100.4	5	5	5	1.738	0	19.0807	5
FALSE	High	Master Protein	A6B528	Diaminopimelate epimerase OS=Vibrio parahaemolyticus serotype O3:K6 (strain AQ3810) GN=dapF PE=3 SV=1	0	27.2136	24.2754	3	3	3	1	276	30.295	6.07	High	High	High		0.913	0.967	104.1	95.1	100.7	3	3	3	0.995	0	16.1336	3
FALSE	High	Master Protein	A6B6Q8	Uncharacterized protein OS=Vibrio parahaemolyticus serotype O3:K6 (strain AQ3810) GN=A79_3351 PE=4 SV=1	0	27.167	23.0303	2	4	2	1	165	18.202	9.42	High	High	High		1.166	1.059	93	108.4	98.5	2	2	2	1.154	0	26.6639	2
FALSE	High	Master Protein	A6B015	Flagellar assembly protein FliH OS=Vibrio parahaemolyticus serotype O3:K6 (strain AQ3810) GN=fliH PE=4 SV=1	0	27.127	21.0526	4	7	4	1	266	29.864	4.58	High	High	High		0.802	0.876	112	89.8	98.1	4	4	4	1.424	0	25.6118	4
FALSE	High	Master Protein	A6BA16	L-aspartate oxidase (Fragment) OS=Vibrio parahaemolyticus serotype O3:K6 (strain AQ3810) GN=A79_1390 PE=4 SV=1	0	27.1067	40.5882	4	9	4	1	170	18.676	4.93	High	High	High		1.143	1.057	93.7	107.2	99.1	4	4	4	2.981	0	34.6276	4
FALSE	High	Master Protein	A6B7A3	Thiazole biosynthesis protein ThiH OS=Vibrio parahaemolyticus serotype O3:K6 (strain AQ3810) GN=thiH PE=4 SV=1	0	27.0721	28.8	9	9	9	1	375	43.157	5.97	High	High	High		0.811	1.035	105.4	85.5	109.1	9	9	9	1.043	0	24.7151	9
FALSE	High	Master Protein	A6B212	Glycogen debranching enzyme OS=Vibrio parahaemolyticus serotype O3:K6 (strain AQ3810) GN=A79_5198 PE=4 SV=1	0	27.0082	65.9091	5	6	5	1	88	10.353	5.12	High	High	High		0.531	0.828	127.1	67.6	105.3	5	5	5	5.813	0	22.9122	5
FALSE	High	Master Protein	A6AY69	CreA protein OS=Vibrio parahaemolyticus serotype O3:K6 (strain AQ3810) GN=A79_1465 PE=4 SV=1	0	26.9962	33.121	5	20	5	1	157	17.25	8.24	High	High	High		1.087	0.992	97.4	105.9	96.7	6	6	6	9	0	56.7573	5
FALSE	High	Master Protein	A6B8H5	Methyl-accepting chemotaxis protein OS=Vibrio parahaemolyticus serotype O3:K6 (strain AQ3810) GN=A79_2902 PE=4 SV=1	0	26.9776	32.2917	5	6	5	1	192	21.433	5.53	High	High	High		0.86	0.878	109.6	94.2	96.2	5	5	5	1.848	0	24.2911	5
FALSE	High	Master Protein	A6B105	Primosomal replication protein N OS=Vibrio parahaemolyticus serotype O3:K6 (strain AQ3810) GN=A79_6069 PE=4 SV=1	0	26.9619	22.0994	2	3	2	1	181	21.156	9.14	High	High	High		0.846	0.869	110.5	93.5	96	2	2	2	0.585	0	15.7678	2
FALSE	High	Master Protein	A6BAB8	tRNA (Guanine-N(7)-)-methyltransferase (Fragment) OS=Vibrio parahaemolyticus serotype O3:K6 (strain AQ3810) GN=trmB PE=3 SV=1	0	26.9555	37.3737	5	10	5	1	198	22.679	6.21	High	High	High		0.728	1.1	106.1	77.2	116.7	5	5	5	2.981	0	30.0598	5
FALSE	High	Master Protein	A6B0Q2	Glutathione S-transferase OS=Vibrio parahaemolyticus serotype O3:K6 (strain AQ3810) GN=A79_3478 PE=3 SV=1	0	26.8253	26.4706	7	10	7	1	204	23.198	4.74	High	High	High		0.758	1.026	107.8	81.7	110.5	7	7	7	2.415	0	21.1053	7
FALSE	High	Master Protein	A6B5C9	Uncharacterized protein OS=Vibrio parahaemolyticus serotype O3:K6 (strain AQ3810) GN=A79_1714 PE=4 SV=1	0	26.8225	29.3233	3	8	3	1	133	14.609	4.75	High	High	High		1.334	1.102	87.3	116.5	96.2	4	4	4	5.813	0	34.4241	3
FALSE	High	Master Protein	A6B0M5	CbbY family protein OS=Vibrio parahaemolyticus serotype O3:K6 (strain AQ3810) GN=A79_3738 PE=4 SV=1	0	26.8216	33	5	7	5	1	200	22.127	5.05	High	High	High		1.264	0.836	96.8	122.3	80.9	5	5	5	2.162	0	24.825	5
FALSE	High	Master Protein	A6B9I0	Stringent starvation protein B OS=Vibrio parahaemolyticus serotype O3:K6 (strain AQ3810) GN=sspB PE=4 SV=1	0	26.8194	36.25	3	3	3	1	160	17.9	4.73	High	High	High		0.585	0.94	118.8	69.5	111.6	3	3	3	1.371	0	19.9573	3
FALSE	High	Master Protein	A6B4F4	Integral membrane protein OS=Vibrio parahaemolyticus serotype O3:K6 (strain AQ3810) GN=A79_0710 PE=4 SV=1	0	26.8128	21.8391	7	18	7	1	261	28.936	6.7	High	High	High		1.115	1.06	94.5	105.4	100.1	7	7	7	2.981	0	40.5281	7
FALSE	High	Master Protein	A6B428	Membrane-fusion protein OS=Vibrio parahaemolyticus serotype O3:K6 (strain AQ3810) GN=A79_5352 PE=3 SV=1	0	26.788	18.5984	7	9	7	1	371	40.17	5.5	High	High	High		1.164	0.954	96.2	112	91.8	7	7	7	1.291	0	19.8985	7
FALSE	High	Master Protein	A6B5K0	Fkbp-type peptidyl-prolyl cis-trans isomerase OS=Vibrio parahaemolyticus serotype O3:K6 (strain AQ3810) GN=A79_3998 PE=4 SV=1	0	26.7706	20.6897	4	7	4	1	232	26.708	6.24	High	High	High		1.191	0.843	98.9	117.8	83.4	5	5	5	2.455	0	19.943	4
FALSE	High	Master Protein	A6B251	DNA repair protein RecN OS=Vibrio parahaemolyticus serotype O3:K6 (strain AQ3810) GN=recN PE=3 SV=1	0	26.6937	17.148	7	7	7	1	554	61.374	5.49	High	High	High		0.977	0.953	102.4	100	97.6	7	7	7	0.607	0	17.7762	7
FALSE	High	Master Protein	A6B066	PTS system, IIB component OS=Vibrio parahaemolyticus serotype O3:K6 (strain AQ3810) GN=A79_2806 PE=4 SV=1	0	26.6903	36.8421	3	6	3	1	95	10.152	4.96	High	High	High		0.813	0.901	110.6	89.9	99.6	3	3	3	5.813	0	24.5019	3
FALSE	High	Master Protein	A6B5K3	Uncharacterized protein OS=Vibrio parahaemolyticus serotype O3:K6 (strain AQ3810) GN=A79_4001 PE=4 SV=1	0	26.6431	20.5128	3	7	3	1	195	22.739	4.5	High	High	High		0.883	1.115	100.1	88.3	111.6	4	4	4	2.162	0	22.1163	3
FALSE	High	Master Protein	A6AWX0	Soluble cytochrome b562 OS=Vibrio parahaemolyticus serotype O3:K6 (strain AQ3810) GN=A79_0409 PE=4 SV=1	0	26.6346	36.4341	4	6	4	1	129	14.515	5.17	High	High	High		0.341	0.879	135.1	46.1	118.7	4	4	4	2.162	0	22.948	4
FALSE	High	Master Protein	A6B2C5	UPF0313 protein A79_4750 OS=Vibrio parahaemolyticus serotype O3:K6 (strain AQ3810) GN=A79_4750 PE=3 SV=1	0	26.6208	10.3761	8	10	8	1	771	86.429	9.25	High	High	High		0.713	1.003	110.4	78.8	110.8	8	8	8	0.514	0	22.0571	8
FALSE	High	Master Protein	A6AZG2	Protein ThiJ OS=Vibrio parahaemolyticus serotype O3:K6 (strain AQ3810) GN=A79_4272 PE=4 SV=1	0	26.6166	33.6683	4	6	4	1	199	21.632	5.24	High	High	High		1.008	1.029	98.8	99.6	101.6	4	4	4	2.594	0	25.0524	4
FALSE	High	Master Protein	A6AYC6	Uncharacterized protein OS=Vibrio parahaemolyticus serotype O3:K6 (strain AQ3810) GN=A79_1522 PE=4 SV=1	0	26.5928	18.9003	5	7	5	1	291	32.648	7.55	High	High	High		0.981	0.939	102.7	100.8	96.5	5	5	5	1.581	0	19.0833	5
FALSE	High	Master Protein	A6AYD8	YbaK / prolyl-tRNA synthetases associated domain protein OS=Vibrio parahaemolyticus serotype O3:K6 (strain AQ3810) GN=A79_1534 PE=4 SV=1	0	26.5342	10.8491	2	6	2	1	212	23.713	6.74	High	High	High		1.318	1.192	85.5	112.7	101.9	2	2	2	1.61	0	20.3332	2
FALSE	High	Master Protein	A6B9G8	RNA pyrophosphohydrolase OS=Vibrio parahaemolyticus serotype O3:K6 (strain AQ3810) GN=rppH PE=3 SV=1	0	26.5119	29.3103	4	9	4	1	174	20.903	10.13	High	High	High		0.845	0.875	110.3	93.2	96.5	4	4	4	2.511	0	29.1808	4
FALSE	High	Master Protein	A6AYK8	Transcriptional regulator OS=Vibrio parahaemolyticus serotype O3:K6 (strain AQ3810) GN=A79_1605 PE=4 SV=1	0	26.4947	28.2392	6	7	6	1	301	34.268	6.62	High	High	High		1.068	1.029	96.9	103.4	99.7	6	6	6	1.371	0	24.6221	6
FALSE	High	Master Protein	A6B5F8	Co/Zn/Cd efflux system component OS=Vibrio parahaemolyticus serotype O3:K6 (strain AQ3810) GN=A79_4693 PE=4 SV=1	0	26.4669	14.0984	3	6	3	1	305	34.102	6.89	High	High	High		1.071	0.976	98.5	105.5	96.1	4	4	4	1.848	0	17.2418	3
FALSE	High	Master Protein	A6B1A7	Uncharacterized protein OS=Vibrio parahaemolyticus serotype O3:K6 (strain AQ3810) GN=A79_1397 PE=4 SV=1	0	26.4586	18.0812	4	5	4	1	271	31.581	8.85	High	High	High		0.654	0.752	124.7	81.5	93.7	4	4	4	0.896	0	15.8821	4
FALSE	High	Master Protein	A6B885	Phenylalanyl-tRNA synthetase beta chain OS=Vibrio parahaemolyticus serotype O3:K6 (strain AQ3810) GN=A79_1104 PE=4 SV=1	0	26.4525	42.7184	4	11	4	1	103	10.939	4.7	High	High	High		0.994	1.082	97.5	97	105.5	4	4	4	6.197	0	29.713	4
FALSE	High	Master Protein	A6B0F4	Sensor histidine kinase OS=Vibrio parahaemolyticus serotype O3:K6 (strain AQ3810) GN=A79_3667 PE=4 SV=1	0	26.4247	17.0561	8	15	8	1	428	49.292	4.89	High	High	High		1.06	0.925	100.5	106.6	92.9	8	8	8	1.512	0	35.6878	8
FALSE	High	Master Protein	A6B759	Lipid A biosynthesis myristoyltransferase OS=Vibrio parahaemolyticus serotype O3:K6 (strain AQ3810) GN=msbB PE=3 SV=1	0	26.3969	19.4529	8	19	8	1	329	37.972	8.78	High	High	High		0.881	0.93	106.7	94	99.3	8	8	8	2.548	0	33.337	8
FALSE	High	Master Protein	A6B3F1	Ggdef family protein OS=Vibrio parahaemolyticus serotype O3:K6 (strain AQ3810) GN=A79_1173 PE=4 SV=1	0	26.3685	14.6868	7	8	7	1	463	52.632	7.09	High	High	High		1.172	0.951	96.1	112.6	91.4	7	7	7	0.957	0	25.6681	7
FALSE	High	Master Protein	A6B6E9	2-C-methyl-D-erythritol 4-phosphate cytidylyltransferase OS=Vibrio parahaemolyticus serotype O3:K6 (strain AQ3810) GN=ispD PE=3 SV=1	0	26.3397	18.8034	4	7	4	1	234	25.483	5.76	High	High	High		0.773	0.971	109.3	84.5	106.1	4	4	4	2.831	0	19.8134	4
FALSE	High	Master Protein	A6AY95	Acriflavin resistance protein OS=Vibrio parahaemolyticus serotype O3:K6 (strain AQ3810) GN=A79_1491 PE=3 SV=1	0	26.279	10.1179	9	12	8	1	1018	112.897	5.08	High	High	High		0.839	0.892	109.9	92.1	98	8	8	8	0.554	0	36.6803	9
FALSE	High	Master Protein	A6B3L8	Uncharacterized protein OS=Vibrio parahaemolyticus serotype O3:K6 (strain AQ3810) GN=A79_0658 PE=4 SV=1	0	26.2408	56.6265	3	7	3	1	83	9.574	5.39	High	High	High		0.49	0.786	131.8	64.6	103.6	4	4	4	5.813	0	27.046	3
FALSE	High	Master Protein	A6B870	Cob(I)alamin adenosyltransferase OS=Vibrio parahaemolyticus serotype O3:K6 (strain AQ3810) GN=cobO PE=4 SV=1	0	26.1704	26.8657	6	14	6	1	201	22.303	6.57	High	High	High		0.934	0.797	109.9	102.6	87.6	6	6	6	2.162	0	38.627	6
FALSE	High	Master Protein	A6B7N8	ButA OS=Vibrio parahaemolyticus serotype O3:K6 (strain AQ3810) GN=A79_2149 PE=3 SV=1	0	26.1672	6.69216	3	9	3	1	523	56.188	5.81	High	High	High		0.896	0.757	113.1	101.3	85.6	5	5	5	3.329	0	25.864	3
FALSE	High	Master Protein	A6B2N7	Opacity associated proteins OapA OS=Vibrio parahaemolyticus serotype O3:K6 (strain AQ3810) GN=A79_0821 PE=4 SV=1	0	26.1634	29.1457	5	7	5	1	199	23.093	10.02	High	High	High		0.956	0.902	104.9	100.4	94.7	5	5	5	1.894	0	22.9236	5
FALSE	High	Master Protein	A6AZ21	Methyl-accepting chemotaxis protein OS=Vibrio parahaemolyticus serotype O3:K6 (strain AQ3810) GN=A79_4433 PE=4 SV=1	0	26.1537	8.44156	4	12	3	1	462	50.61	6.47	High	High	High		0.948	0.824	108.2	102.6	89.2	3	3	3	0.778	0	42.3924	4
FALSE	High	Master Protein	A6B3L9	Glucosamine-6-phosphate deaminase OS=Vibrio parahaemolyticus serotype O3:K6 (strain AQ3810) GN=nagB PE=3 SV=1	0	26.081	20.6767	4	8	4	1	266	29.639	6.28	High	High	High		0.86	0.972	105.9	91.1	102.9	4	4	4	2.162	0	25.3963	4
FALSE	High	Master Protein	A6AXZ2	Signal transduction histidine kinase regulating citrate/malate metabolism OS=Vibrio parahaemolyticus serotype O3:K6 (strain AQ3810) GN=A79_1003 PE=4 SV=1	0	25.9913	10.9462	5	6	5	1	539	59.96	5.6	High	High	High		1.274	1.019	91.1	116.1	92.8	5	5	5	0.52	0	18.3594	5
FALSE	High	Master Protein	A6B2X1	Serine acetyltransferase OS=Vibrio parahaemolyticus serotype O3:K6 (strain AQ3810) GN=A79_5013 PE=4 SV=1	0	25.9287	30.4029	8	14	8	1	273	29.306	6.84	High	High	High		0.901	0.953	105.1	94.7	100.2	8	8	8	2.162	0	34.6286	8
FALSE	High	Master Protein	A6B6L5	Uncharacterized protein (Fragment) OS=Vibrio parahaemolyticus serotype O3:K6 (strain AQ3810) GN=A79_4189 PE=4 SV=1	0	25.8556	29.9625	5	6	5	1	267	29.833	7.4	High	High	High		0.731	0.991	110.2	80.6	109.2	5	5	5	1.054	0	23.7217	5
FALSE	High	Master Protein	A6B2K1	Oligopeptide transport ATP-binding protein AppF OS=Vibrio parahaemolyticus serotype O3:K6 (strain AQ3810) GN=A79_0042 PE=4 SV=1	0	25.7789	15.4122	4	10	3	1	279	31.279	9.54	High	High	High		0.827	1.119	101.8	84.2	114	4	4	4	1.929	0	21.4103	4
FALSE	High	Master Protein	A6B068	Transcriptional regulator OS=Vibrio parahaemolyticus serotype O3:K6 (strain AQ3810) GN=A79_2808 PE=4 SV=1	0	25.5178	17.2515	4	6	4	1	342	37.452	6.99	High	High	High		1.033	0.924	101.4	104.8	93.8	5	5	5	1.069	0	17.2999	4
FALSE	High	Master Protein	A6B2W4	YcgL domain-containing protein A79_2353 OS=Vibrio parahaemolyticus serotype O3:K6 (strain AQ3810) GN=A79_2353 PE=3 SV=1	0	25.5091	40.4255	3	5	3	1	94	10.829	8.92	High	High	High		0.527	0.997	118.9	62.7	118.5	3	3	3	9	0	18.641	3
FALSE	High	Master Protein	A6B1W4	Multidrug resistance efflux pump OS=Vibrio parahaemolyticus serotype O3:K6 (strain AQ3810) GN=A79_5939 PE=4 SV=1	0	25.4822	13.1965	4	6	4	1	341	36.959	6.33	High	High	High		0.697	0.667	126.9	88.5	84.7	4	4	4	1.154	0	18.5584	4
FALSE	High	Master Protein	A6B7M0	Acriflavin resistance plasma membrane protein (Fragment) OS=Vibrio parahaemolyticus serotype O3:K6 (strain AQ3810) GN=A79_2581 PE=4 SV=1	0	25.4171	18.6992	5	10	5	1	246	26.357	6.39	High	High	High		0.922	1.097	99.4	91.6	109	5	5	5	3.329	0	30.7584	5
FALSE	High	Master Protein	A6B3M0	Uncharacterized protein OS=Vibrio parahaemolyticus serotype O3:K6 (strain AQ3810) GN=A79_0660 PE=4 SV=1	0	25.3363	23.6111	6	9	6	1	288	33.153	7.27	High	High	High		0.882	0.835	110.4	97.4	92.2	6	6	6	1.239	0	23.5988	6
FALSE	High	Master Protein	A6B197	Glutaredoxin OS=Vibrio parahaemolyticus serotype O3:K6 (strain AQ3810) GN=A79_1880 PE=4 SV=1	0	25.3259	41.1765	7	9	7	1	204	22.724	5.96	High	High	High		0.852	0.918	108.3	92.3	99.4	7	7	7	1.783	0	29.0237	7
FALSE	High	Master Protein	A6B1X3	Oligogalacturonate lyase OS=Vibrio parahaemolyticus serotype O3:K6 (strain AQ3810) GN=A79_5948 PE=4 SV=1	0	25.2985	19.3299	6	6	6	1	388	44.154	4.75	High	High	High		0.955	1.138	97	92.6	110.4	6	6	6	1.154	0	19.8804	6
FALSE	High	Master Protein	A6B9C4	Inner membrane protein YedI OS=Vibrio parahaemolyticus serotype O3:K6 (strain AQ3810) GN=A79_3812 PE=4 SV=1	0	25.2352	11.2957	3	5	3	1	301	31.793	6.65	High	High	High		1.178	0.982	94.9	111.8	93.2	3	3	3	1.512	0	22.2466	3
FALSE	High	Master Protein	A6B7R0	Anthranilate phosphoribosyltransferase OS=Vibrio parahaemolyticus serotype O3:K6 (strain AQ3810) GN=trpD PE=3 SV=1	0	25.2081	18.3735	4	4	4	1	332	35.393	5.4	High	High	High		0.884	0.958	105.5	93.3	101.1	4	4	4	0.719	0	20.0335	4
FALSE	High	Master Protein	A6B8K6	Formamidopyrimidine-DNA glycosylase OS=Vibrio parahaemolyticus serotype O3:K6 (strain AQ3810) GN=mutM PE=3 SV=1	0	25.1289	20.8178	5	8	5	1	269	30.077	8.06	High	High	High		0.838	1.021	104.9	88	107.1	5	5	5	1.929	0	17.5559	5
FALSE	High	Master Protein	A6AZX9	Uncharacterized protein OS=Vibrio parahaemolyticus serotype O3:K6 (strain AQ3810) GN=A79_2620 PE=4 SV=1	0	25.1144	21.9008	4	6	4	1	242	26.506	5.21	High	High	High		0.981	1.169	95.3	93.4	111.3	4	4	4	1.276	0	21.1679	4
FALSE	High	Master Protein	A6B319	YecA family protein OS=Vibrio parahaemolyticus serotype O3:K6 (strain AQ3810) GN=A79_2441 PE=3 SV=1	0	25.0807	16.2562	3	7	3	1	203	22.69	3.92	High	High	High		0.574	1	116.5	66.9	116.6	3	3	3	5.813	0	17.8626	3
FALSE	High	Master Protein	A6AX89	CpsB OS=Vibrio parahaemolyticus serotype O3:K6 (strain AQ3810) GN=A79_0529 PE=4 SV=1	0	25.0727	15.9204	5	6	5	1	402	46.55	5.57	High	High	High		0.739	1.004	109.4	80.8	109.8	6	6	6	0.668	0	17.8448	5
FALSE	High	Master Protein	A6AZU8	Cobyric acid synthase OS=Vibrio parahaemolyticus serotype O3:K6 (strain AQ3810) GN=cobQ PE=3 SV=1	0	25.0471	15.3846	7	9	7	1	494	53.778	5.34	High	High	High		0.925	0.903	106.1	98.1	95.8	7	7	7	0.817	0	29.3323	7
[truncated: 1,093 more rows]
