# Supplementary material for: Global Proteomic Analysis of the Resuscitation State of Vibrio parahaemolyticus Compared With the Normal and Viable but Non-culturable State
Source: Front Microbiol. 2019 May 8;10:1045. doi: 10.3389/fmicb.2019.01045 (PMC6517545; doi:10.3389/fmicb.2019.01045)
Supplement: TABLE S3 — The DEPs and the GO enrichment information. (A) The DEPs of the resuscitation cells compared with the VBNC cells. (B) The DEPs of the resuscitation cells in comparison with the exponential-phase cells. (C) GO enrichment of the DEPs of the resuscitation cells compared with the VBNC cells. (D) GO enrichment of the DEPs of the resuscitation cells compared with the exponential-phase cells. [file Table_3.xlsx]

## Sheet: Supplementary talbe 3A
Accession	Description	VBNC	R	FC(R/V)	log2FC(R/V)	regulate	GO	KO	COG
A6AZI2	Glycerol kinase OS=Vibrio parahaemolyticus serotype O3:K6 (strain AQ3810) GN=glpK PE=3 SV=1	1.47	0.961	0.653741	-0.613208	down	GO:0000166;GO:0004370;GO:0005524;GO:0005975;GO:0006071;GO:0006072;GO:0016301;GO:0016310;GO:0016740;GO:0016773;GO:0019563	K00864	COG0554
A6B3G6	Periplasmic oligopeptide-binding protein OS=Vibrio parahaemolyticus serotype O3:K6 (strain AQ3810) GN=A79_1188 PE=4 SV=1	1.703	1.119	0.657076	-0.605868	down	GO:0043190;GO:0055085	K15580	COG4166
A6B4N8	Citrate synthase OS=Vibrio parahaemolyticus serotype O3:K6 (strain AQ3810) GN=gltA PE=3 SV=1	1.473	0.885	0.600815	-0.735008	down	GO:0004108;GO:0005737;GO:0006099;GO:0016020;GO:0016021;GO:0016740;GO:0016746;GO:0046912	K01647	COG0372
A6B120	PrkA AAA OS=Vibrio parahaemolyticus serotype O3:K6 (strain AQ3810) GN=A79_6084 PE=4 SV=1	1.829	1.115	0.609623	-0.714011	down	GO:0004672;GO:0006468	K07180	COG2766
A6B0M6	Outer membrane protein OmpA OS=Vibrio parahaemolyticus serotype O3:K6 (strain AQ3810) GN=A79_3739 PE=3 SV=1	1.378	0.81	0.587808	-0.766582	down	GO:0009279;GO:0016020;GO:0016021	K03286	COG2885
A6B9M3	Bifunctional protein PutA (Fragment) OS=Vibrio parahaemolyticus serotype O3:K6 (strain AQ3810) GN=A79_5166 PE=4 SV=1	1.742	0.916	0.525832	-0.927325	down	GO:0003842;GO:0004657;GO:0016491;GO:0055114	K13821	COG0506
A6B8U9	Aspartate ammonia-lyase OS=Vibrio parahaemolyticus serotype O3:K6 (strain AQ3810) GN=aspA PE=3 SV=1	0.642	0.977	1.52181	0.605785	up	GO:0003824;GO:0006099;GO:0006531;GO:0008797;GO:0016829	K01744	COG1027
A6B3X2	Translation elongation factor OS=Vibrio parahaemolyticus serotype O3:K6 (strain AQ3810) GN=A79_2025 PE=4 SV=1	1.312	0.798	0.608232	-0.717307	down	GO:0003746;GO:0003924;GO:0005525;GO:0006414	K02355	COG0480
A6B511	Oxaloacetate decarboxylase alpha subunit OS=Vibrio parahaemolyticus serotype O3:K6 (strain AQ3810) GN=oadA PE=4 SV=1	1.388	0.918	0.661383	-0.596442	down	GO:0003824;GO:0006814;GO:0008948;GO:0016829	K01571	COG0511;COG5016
A6B1L8	Tryptophanase OS=Vibrio parahaemolyticus serotype O3:K6 (strain AQ3810) GN=tnaA PE=3 SV=1	2.171	1.087	0.500691	-0.998008	down	GO:0003824;GO:0006520;GO:0006568;GO:0006569;GO:0009034;GO:0009072;GO:0016829;GO:0016830	K01667	COG3033
A6B7N1	Trigger factor OS=Vibrio parahaemolyticus serotype O3:K6 (strain AQ3810) GN=tig PE=3 SV=1	0.508	1.163	2.28937	1.19495	up	GO:0000413;GO:0003755;GO:0005737;GO:0006457;GO:0007049;GO:0015031;GO:0016853;GO:0051301	K03545	COG0544
A6B849	Phosphoenolpyruvate carboxykinase [ATP] OS=Vibrio parahaemolyticus serotype O3:K6 (strain AQ3810) GN=pckA PE=3 SV=1	0.486	0.873	1.7963	0.845025	up	GO:0000166;GO:0004611;GO:0004612;GO:0005524;GO:0005737;GO:0006094;GO:0016301;GO:0016310;GO:0016829;GO:0016831;GO:0017076;GO:0046872	K01610	COG1866
A6B4S8	Peptide ABC transporter, periplasmic peptide-binding protein OS=Vibrio parahaemolyticus serotype O3:K6 (strain AQ3810) GN=A79_6282 PE=4 SV=1	0.563	0.943	1.67496	0.744123	up	GO:0043190;GO:0055085	K02035	COG0747
A6AYD5	Catalase-peroxidase OS=Vibrio parahaemolyticus serotype O3:K6 (strain AQ3810) GN=katG PE=3 SV=1	1.712	1.018	0.594626	-0.749945	down	GO:0004096;GO:0004601;GO:0006979;GO:0016491;GO:0020037;GO:0042744;GO:0046872;GO:0055114;GO:0098869	K03782	COG0376
A6B4R2	Acyl-coenzyme A dehydrogenase OS=Vibrio parahaemolyticus serotype O3:K6 (strain AQ3810) GN=A79_1933 PE=4 SV=1	1.645	0.995	0.604863	-0.725319	down	GO:0003995;GO:0008152;GO:0016491;GO:0016627;GO:0033539;GO:0050660;GO:0055114	K00257	COG1960
A6AZH9	Glycerophosphoryl diester phosphodiesterase OS=Vibrio parahaemolyticus serotype O3:K6 (strain AQ3810) GN=A79_4289 PE=4 SV=1	0.358	0.738	2.06145	1.04366	up	GO:0006629;GO:0008081;GO:0008889;GO:0016787	K01126	COG0584
A6B407	Chaperone protein HtpG OS=Vibrio parahaemolyticus serotype O3:K6 (strain AQ3810) GN=htpG PE=3 SV=1	0.642	1.197	1.86449	0.898778	up	GO:0000166;GO:0005524;GO:0005737;GO:0006457;GO:0006950;GO:0051082	K04079	COG0326
A6B4N2	Dihydrolipoyllysine-residue succinyltransferase component of 2-oxoglutarate dehydrogenase complex OS=Vibrio parahaemolyticus serotype O3:K6 (strain AQ3810) GN=sucB PE=3 SV=1	1.487	0.952	0.640215	-0.643371	down	GO:0004149;GO:0006099;GO:0008152;GO:0016740;GO:0016746;GO:0033512;GO:0045252	K00658	COG0508
A6B7V8	Elongation factor Ts OS=Vibrio parahaemolyticus serotype O3:K6 (strain AQ3810) GN=tsf PE=3 SV=1	0.69	1.071	1.55217	0.63429	up	GO:0003746;GO:0005622;GO:0005737;GO:0006412;GO:0006414	K02357	COG0264
A6B1G9	Acriflavin resistance protein OS=Vibrio parahaemolyticus serotype O3:K6 (strain AQ3810) GN=A79_0173 PE=3 SV=1	1.499	0.945	0.63042	-0.665614	down	GO:0005215;GO:0006810;GO:0016020;GO:0016021	-	COG0841
A6AZX6	Fatty acid oxidation complex subunit alpha OS=Vibrio parahaemolyticus serotype O3:K6 (strain AQ3810) GN=fadJ PE=3 SV=1	1.536	0.978	0.636719	-0.651272	down	GO:0003824;GO:0003857;GO:0004300;GO:0005737;GO:0006629;GO:0006631;GO:0006635;GO:0008152;GO:0008692;GO:0016042;GO:0016491;GO:0016829;GO:0016853;GO:0051287;GO:0055114	K01782	COG1024;COG1250
A6B2S2	Malate dehydrogenase OS=Vibrio parahaemolyticus serotype O3:K6 (strain AQ3810) GN=mdh PE=3 SV=1	0.598	0.925	1.54682	0.629308	up	GO:0003824;GO:0005975;GO:0006099;GO:0006108;GO:0016491;GO:0016615;GO:0016616;GO:0019752;GO:0030060;GO:0055114	K00024	COG0039
A6B9B6	DNA-directed RNA polymerase subunit alpha OS=Vibrio parahaemolyticus serotype O3:K6 (strain AQ3810) GN=rpoA PE=3 SV=1	0.718	1.09	1.51811	0.602272	up	GO:0003677;GO:0003899;GO:0006351;GO:0016740;GO:0016779;GO:0046983	K03040	COG0202
A6B7L3	Protein HflC OS=Vibrio parahaemolyticus serotype O3:K6 (strain AQ3810) GN=hflC PE=3 SV=1	1.58	0.987	0.624684	-0.678803	down	GO:0016020;GO:0016021;GO:0052547	K04087	COG0330
A6B798	Phosphomethylpyrimidine synthase OS=Vibrio parahaemolyticus serotype O3:K6 (strain AQ3810) GN=thiC PE=3 SV=1	0.644	1.093	1.6972	0.763161	up	GO:0008270;GO:0009228;GO:0009229;GO:0016829;GO:0046872;GO:0051536;GO:0051539	K03147	COG0422
A6BB07	Proline dehydrogenase (Fragment) OS=Vibrio parahaemolyticus serotype O3:K6 (strain AQ3810) GN=A79_0754 PE=4 SV=1	1.82	0.933	0.512637	-0.963989	down	GO:0008152;GO:0016491;GO:0055114	K13821	-
A6BBC5	Cysteine synthase A (O-acetylserine sulfhydrylase A) (O-acetylserine (Thiol)-lyase A) (Fragment) OS=Vibrio parahaemolyticus serotype O3:K6 (strain AQ3810) GN=A79_4084 PE=4 SV=1	0.661	1.017	1.53858	0.621598	up	GO:0004124;GO:0016740;GO:0016829;GO:0019344	K01738	COG0031
A6B7I9	PhoH family protein OS=Vibrio parahaemolyticus serotype O3:K6 (strain AQ3810) GN=A79_2139 PE=4 SV=1	2.553	1.017	0.398355	-1.32787	down	GO:0005524	K07175	COG1875
A6B6U0	Aminopeptidase N OS=Vibrio parahaemolyticus serotype O3:K6 (strain AQ3810) GN=pepN PE=4 SV=1	0.667	1.064	1.5952	0.673739	up	GO:0004177;GO:0006508;GO:0008237;GO:0008270;GO:0016787	K01256	COG0308
A6B610	Fatty acid oxidation complex subunit alpha (Fragment) OS=Vibrio parahaemolyticus serotype O3:K6 (strain AQ3810) GN=fadB PE=3 SV=1	1.634	1.084	0.663403	-0.592043	down	GO:0003824;GO:0003857;GO:0004165;GO:0004300;GO:0006629;GO:0006631;GO:0006635;GO:0008152;GO:0008692;GO:0009062;GO:0016042;GO:0016491;GO:0016829;GO:0016853;GO:0036125;GO:0055114	K01825	COG1024;COG1250
A6B0W6	Alpha-1,4 glucan phosphorylase OS=Vibrio parahaemolyticus serotype O3:K6 (strain AQ3810) GN=A79_5429 PE=3 SV=1	0.89	1.555	1.74719	0.805037	up	GO:0004645;GO:0005975;GO:0008184;GO:0016740;GO:0016757;GO:0030170	K00688	COG0058
A6B0M7	Phospho-2-dehydro-3-deoxyheptonate aldolase OS=Vibrio parahaemolyticus serotype O3:K6 (strain AQ3810) GN=A79_3740 PE=3 SV=1	1.368	0.801	0.585526	-0.772194	down	GO:0003824;GO:0003849;GO:0008652;GO:0009058;GO:0009073;GO:0009423;GO:0016740	K01626	COG0722
A6B8A6	30S ribosomal protein S1 (Fragment) OS=Vibrio parahaemolyticus serotype O3:K6 (strain AQ3810) GN=A79_5909 PE=4 SV=1	0.721	1.084	1.50347	0.588294	up	GO:0003676;GO:0005840	K02945	-
A6B7N7	Methyl-accepting chemotaxis protein OS=Vibrio parahaemolyticus serotype O3:K6 (strain AQ3810) GN=A79_2148 PE=4 SV=1	1.324	0.887	0.66994	-0.577897	down	GO:0004871;GO:0007165;GO:0016020;GO:0016021	K03406	COG0840
A6B1V9	Uncharacterized protein OS=Vibrio parahaemolyticus serotype O3:K6 (strain AQ3810) GN=A79_5934 PE=4 SV=1	0.59	1.218	2.06441	1.04573	up	GO:0003824	K03931	-
A6AWY6	2-amino-3-ketobutyrate coenzyme A ligase OS=Vibrio parahaemolyticus serotype O3:K6 (strain AQ3810) GN=kbl PE=3 SV=1	0.461	0.864	1.87419	0.906265	up	GO:0003824;GO:0006567;GO:0008152;GO:0008890;GO:0009058;GO:0016740;GO:0016746;GO:0016874;GO:0019518;GO:0030170	K00639	COG0156
A6AX92	Periplasmic maltose-binding protein OS=Vibrio parahaemolyticus serotype O3:K6 (strain AQ3810) GN=A79_0532 PE=4 SV=1	0.329	1.072	3.25836	1.70415	up	GO:0005215;GO:0005363;GO:0006810;GO:0015768	K10108	COG2182
A6B4A1	Trimethylamine-N-oxide reductase 2 OS=Vibrio parahaemolyticus serotype O3:K6 (strain AQ3810) GN=A79_0100 PE=3 SV=1	0.68	1.116	1.64118	0.71473	up	GO:0009055;GO:0016491;GO:0030151;GO:0046872;GO:0050626;GO:0055114	K07812	COG0243
A6B5Z0	Cell division protein FtsA OS=Vibrio parahaemolyticus serotype O3:K6 (strain AQ3810) GN=ftsA PE=3 SV=1	1.551	1.033	0.666022	-0.586358	down	GO:0005886;GO:0007049;GO:0008360;GO:0009898;GO:0016020;GO:0032153;GO:0043093;GO:0051301	K03590	COG0849
A6B7V9	30S ribosomal protein S2 OS=Vibrio parahaemolyticus serotype O3:K6 (strain AQ3810) GN=rpsB PE=3 SV=1	0.603	1.014	1.68159	0.749828	up	GO:0003735;GO:0005622;GO:0005840;GO:0006412;GO:0015935;GO:0030529	K02967	COG0052
A6B3R1	Adenylosuccinate lyase OS=Vibrio parahaemolyticus serotype O3:K6 (strain AQ3810) GN=purB PE=3 SV=1	0.727	1.256	1.72765	0.788809	up	GO:0003824;GO:0004018;GO:0006164;GO:0006188;GO:0006189;GO:0009152;GO:0016829;GO:0044208;GO:0070626	K01756	COG0015
A6AY52	Bordetella uptake gene family protein OS=Vibrio parahaemolyticus serotype O3:K6 (strain AQ3810) GN=A79_1063 PE=4 SV=1	0.748	1.325	1.77139	0.824882	up	GO:0030288	K07795	COG3181
A6B969	Uncharacterized protein OS=Vibrio parahaemolyticus serotype O3:K6 (strain AQ3810) GN=A79_1685 PE=4 SV=1	1.877	0.798	0.425147	-1.23397	down	GO:0008152;GO:0016491;GO:0055114	-	COG4230
A6B7X4	Cytochrome D ubiquinol oxidase subunit 1 OS=Vibrio parahaemolyticus serotype O3:K6 (strain AQ3810) GN=A79_5811 PE=4 SV=1	1.586	0.892	0.562421	-0.830277	down	GO:0016020;GO:0016021;GO:0016491;GO:0055114	K00425	COG1271
A6B2S0	Immunogenic protein OS=Vibrio parahaemolyticus serotype O3:K6 (strain AQ3810) GN=A79_0854 PE=4 SV=1	0.399	0.919	2.30326	1.20368	up	-	K07080	COG2358
A6B5S6	Universal stress protein OS=Vibrio parahaemolyticus serotype O3:K6 (strain AQ3810) GN=A79_2203 PE=3 SV=1	1.525	0.886	0.580984	-0.783431	down	GO:0005737;GO:0006950	-	COG0589
A6AY99	Aminomethyltransferase OS=Vibrio parahaemolyticus serotype O3:K6 (strain AQ3810) GN=gcvT PE=3 SV=1	0.545	0.863	1.58349	0.663104	up	GO:0004047;GO:0006546;GO:0008483;GO:0016740;GO:0032259	K00605	COG0404
A6B9K7	Protease do OS=Vibrio parahaemolyticus serotype O3:K6 (strain AQ3810) GN=A79_1207 PE=4 SV=1	0.503	0.996	1.98012	0.985587	up	GO:0004252;GO:0006508;GO:0008233;GO:0016787	K04771	COG0265
A6AYY4	Spermidine/putrescine-binding periplasmic protein OS=Vibrio parahaemolyticus serotype O3:K6 (strain AQ3810) GN=A79_6215 PE=4 SV=1	0.475	1.218	2.56421	1.35851	up	-	K02055	COG0687
A6B343	Inositol monophosphate family protein OS=Vibrio parahaemolyticus serotype O3:K6 (strain AQ3810) GN=A79_0770 PE=4 SV=1	0.692	1.369	1.97832	0.984279	up	GO:0008934;GO:0046854;GO:0046855	K01092	COG0483
A6B2A7	Twin-arginine translocation pathway signal OS=Vibrio parahaemolyticus serotype O3:K6 (strain AQ3810) GN=A79_5119 PE=3 SV=1	0.551	1.138	2.06534	1.04638	up	GO:0016491;GO:0030151;GO:0046872;GO:0051536;GO:0051539;GO:0055114	K00123	COG0243
A6B7X1	Aspartate aminotransferase OS=Vibrio parahaemolyticus serotype O3:K6 (strain AQ3810) GN=A79_2008 PE=3 SV=1	0.642	0.974	1.51713	0.601348	up	GO:0003824;GO:0004069;GO:0006520;GO:0008483;GO:0009058;GO:0016740;GO:0030170;GO:0080130	K00832	COG1448
A6B609	3-ketoacyl-CoA thiolase OS=Vibrio parahaemolyticus serotype O3:K6 (strain AQ3810) GN=fadA PE=3 SV=1	1.631	1.055	0.646842	-0.628514	down	GO:0003824;GO:0003988;GO:0005737;GO:0006629;GO:0006631;GO:0006635;GO:0008152;GO:0016042;GO:0016740;GO:0016746;GO:0016747	K00632	COG0183
A6AYW7	Homogentisate 1,2-dioxygenase OS=Vibrio parahaemolyticus serotype O3:K6 (strain AQ3810) GN=hmgA PE=3 SV=1	2.058	1.05	0.510204	-0.970854	down	GO:0004411;GO:0006559;GO:0006570;GO:0016491;GO:0046872;GO:0051213;GO:0055114	K00451	COG3508
A6B8S5	Uncharacterized protein OS=Vibrio parahaemolyticus serotype O3:K6 (strain AQ3810) GN=A79_0119 PE=4 SV=1	1.519	0.943	0.620803	-0.687792	down	-	-	-
A6AYY6	Proline racemase OS=Vibrio parahaemolyticus serotype O3:K6 (strain AQ3810) GN=A79_6217 PE=3 SV=1	1.576	0.89	0.564721	-0.82439	down	-	-	COG3938
A6B6J7	RNA polymerase sigma factor RpoD OS=Vibrio parahaemolyticus serotype O3:K6 (strain AQ3810) GN=rpoD PE=3 SV=1	0.62	1.033	1.66613	0.7365	up	GO:0001123;GO:0003677;GO:0003700;GO:0005737;GO:0006351;GO:0006352;GO:0006355;GO:0010468;GO:0016987	K03086	COG0568
A6B155	Alcohol dehydrogenase 2 OS=Vibrio parahaemolyticus serotype O3:K6 (strain AQ3810) GN=A79_1838 PE=4 SV=1	0.533	0.976	1.83114	0.872746	up	GO:0004022;GO:0016491;GO:0046872;GO:0055114	K13954	COG1454
A6BB18	Proline dehydrogenase OS=Vibrio parahaemolyticus serotype O3:K6 (strain AQ3810) GN=A79_0346 PE=4 SV=1	1.613	0.967	0.599504	-0.738159	down	GO:0008152;GO:0016491;GO:0055114	K13821	COG4230
A6B2Z5	Aminotransferase, class I OS=Vibrio parahaemolyticus serotype O3:K6 (strain AQ3810) GN=A79_5037 PE=4 SV=1	1.489	0.985	0.661518	-0.596148	down	GO:0003824;GO:0008483;GO:0009058;GO:0016740;GO:0030170	K14260	COG0436
A6B111	Amino acid ABC transporter, periplasmic amino acid-binding protein OS=Vibrio parahaemolyticus serotype O3:K6 (strain AQ3810) GN=A79_6075 PE=3 SV=1	0.486	0.868	1.78601	0.836739	up	GO:0004970;GO:0005215;GO:0006810;GO:0016020;GO:0030288;GO:0035235	K10022	COG0834
A6B4K2	Aspartate-semialdehyde dehydrogenase OS=Vibrio parahaemolyticus serotype O3:K6 (strain AQ3810) GN=asd PE=3 SV=1	0.519	0.914	1.76108	0.81646	up	GO:0003942;GO:0004073;GO:0005737;GO:0006520;GO:0008652;GO:0009085;GO:0009086;GO:0009088;GO:0009089;GO:0009097;GO:0016491;GO:0016620;GO:0019877;GO:0046983;GO:0050661;GO:0051287;GO:0055114;GO:0071266	K00133	COG0136
A6B2M5	Protein YhgF OS=Vibrio parahaemolyticus serotype O3:K6 (strain AQ3810) GN=A79_0066 PE=4 SV=1	0.708	1.183	1.6709	0.740629	up	GO:0003676;GO:0006139	K06959	COG2183
A6B9M6	50S ribosomal protein L4 OS=Vibrio parahaemolyticus serotype O3:K6 (strain AQ3810) GN=rplD PE=3 SV=1	0.478	0.998	2.08787	1.06203	up	GO:0003723;GO:0003735;GO:0005840;GO:0006412;GO:0019843;GO:0030529	K02926	COG0088
A6B9C8	Malic enzyme OS=Vibrio parahaemolyticus serotype O3:K6 (strain AQ3810) GN=A79_1112 PE=4 SV=1	0.573	0.92	1.60558	0.683099	up	GO:0004470;GO:0004471;GO:0006108;GO:0051287;GO:0055114	K00029	COG0281
A6B827	Universal stress protein UspA (Fragment) OS=Vibrio parahaemolyticus serotype O3:K6 (strain AQ3810) GN=A79_3553 PE=4 SV=1	1.521	1.002	0.658777	-0.602138	down	GO:0006950	K14055	COG0589
A6B711	Cytochrome c oxidase, Cbb3-type, subunit II OS=Vibrio parahaemolyticus serotype O3:K6 (strain AQ3810) GN=ccoO PE=4 SV=1	1.425	0.924	0.648421	-0.624997	down	GO:0004129;GO:0005506;GO:0009055;GO:0009060;GO:0016020;GO:0016021;GO:0016491;GO:0020037;GO:0055114;GO:1902600	K00405	COG2993
A6B7G3	Glucose-6-phosphate isomerase OS=Vibrio parahaemolyticus serotype O3:K6 (strain AQ3810) GN=pgi PE=3 SV=1	0.806	1.302	1.61538	0.691878	up	GO:0004347;GO:0005737;GO:0006094;GO:0006096;GO:0016853	K01810	COG0166
A6B2P4	Sulfate adenylyltransferase subunit 1 OS=Vibrio parahaemolyticus serotype O3:K6 (strain AQ3810) GN=cysN PE=3 SV=1	0.651	1.035	1.58986	0.668901	up	GO:0000103;GO:0000166;GO:0003924;GO:0004781;GO:0005524;GO:0005525;GO:0006790;GO:0016740;GO:0016779;GO:0070814	K00956	COG2895
A6AZB7	D-ribose-binding periplasmic protein OS=Vibrio parahaemolyticus serotype O3:K6 (strain AQ3810) GN=A79_4530 PE=4 SV=1	0.515	1.11	2.15534	1.10792	up	GO:0015407;GO:0015749;GO:0016787	K10439	COG1879
A6B6J1	Uncharacterized protein OS=Vibrio parahaemolyticus serotype O3:K6 (strain AQ3810) GN=A79_5480 PE=4 SV=1	1.807	0.944	0.522413	-0.936738	down	GO:0016020;GO:0016021	K09797	COG2859
A6B2W6	2,3-bisphosphoglycerate-independent phosphoglycerate mutase OS=Vibrio parahaemolyticus serotype O3:K6 (strain AQ3810) GN=gpmI PE=3 SV=1	0.626	1.154	1.84345	0.882409	up	GO:0003824;GO:0004619;GO:0005737;GO:0006007;GO:0006096;GO:0008152;GO:0016853;GO:0030145;GO:0046537;GO:0046872	K15633	COG0696
A6B9H8	Ubiquinol-Cytochrome c reductase, cytochrome c1 OS=Vibrio parahaemolyticus serotype O3:K6 (strain AQ3810) GN=A79_5879 PE=4 SV=1	1.55	1.012	0.652903	-0.615059	down	GO:0009055;GO:0016020;GO:0016021;GO:0020037	K00413	COG2857
A6B1G8	Membrane-fusion protein OS=Vibrio parahaemolyticus serotype O3:K6 (strain AQ3810) GN=A79_0172 PE=3 SV=1	1.461	0.937	0.641342	-0.640835	down	GO:0016020;GO:0055085	-	COG0845
A6B4S7	Peptide ABC transporter, permease protein OS=Vibrio parahaemolyticus serotype O3:K6 (strain AQ3810) GN=A79_6281 PE=3 SV=1	1.721	1.075	0.624637	-0.67891	down	GO:0005886;GO:0006810;GO:0016020;GO:0016021	K02033	COG0601
A6BBP4	30S ribosomal protein S6 OS=Vibrio parahaemolyticus serotype O3:K6 (strain AQ3810) GN=rpsF PE=3 SV=1	0.565	1.082	1.91504	0.937378	up	GO:0003723;GO:0003735;GO:0005840;GO:0006412;GO:0019843;GO:0030529	K02990	COG0360
A6B623	Outer membrane protein OS=Vibrio parahaemolyticus serotype O3:K6 (strain AQ3810) GN=A79_5748 PE=4 SV=1	1.107	1.84	1.66215	0.733051	up	GO:0006810;GO:0015288;GO:0016020;GO:0055085	-	COG3203
A6B9N4	Phosphatidylserine decarboxylase OS=Vibrio parahaemolyticus serotype O3:K6 (strain AQ3810) GN=A79_5682 PE=4 SV=1	1.558	0.889	0.570603	-0.80944	down	-	-	COG3001
A6B154	Sigma cross-reacting protein 27A OS=Vibrio parahaemolyticus serotype O3:K6 (strain AQ3810) GN=A79_1837 PE=4 SV=1	1.422	0.84	0.590717	-0.75946	down	-	-	COG3155
A6BBF2	Ribosomal protein S7 (Fragment) OS=Vibrio parahaemolyticus serotype O3:K6 (strain AQ3810) GN=rpsG PE=3 SV=1	0.278	1.148	4.1295	2.04597	up	GO:0003723;GO:0003735;GO:0005840;GO:0006412;GO:0015935;GO:0019843;GO:0030529	K02992	COG0049
A6B9M5	50S ribosomal protein L3 OS=Vibrio parahaemolyticus serotype O3:K6 (strain AQ3810) GN=rplC PE=3 SV=1	0.529	1.084	2.04915	1.03503	up	GO:0003723;GO:0003735;GO:0005622;GO:0005840;GO:0006412;GO:0019843;GO:0030529	K02906	COG0087
A6B4L5	Protease 4 OS=Vibrio parahaemolyticus serotype O3:K6 (strain AQ3810) GN=sppA PE=3 SV=1	0.679	1.022	1.50515	0.589912	up	GO:0005886;GO:0006465;GO:0006508;GO:0008233;GO:0016020;GO:0016021;GO:0016787	K04773	COG0616
A6B9H0	50S ribosomal protein L6 OS=Vibrio parahaemolyticus serotype O3:K6 (strain AQ3810) GN=rplF PE=3 SV=1	0.382	1.057	2.76702	1.46833	up	GO:0003723;GO:0003735;GO:0005622;GO:0005840;GO:0006412;GO:0019843;GO:0030529	K02933	COG0097
A6AX62	TrkA-N domain protein OS=Vibrio parahaemolyticus serotype O3:K6 (strain AQ3810) GN=A79_0502 PE=4 SV=1	2.419	0.86	0.355519	-1.492	down	GO:0006813;GO:0008324;GO:0098655	K03499	COG0569
A6BC19	Shikimate kinase OS=Vibrio parahaemolyticus serotype O3:K6 (strain AQ3810) GN=aroK PE=3 SV=1	0.589	0.972	1.65025	0.722689	up	GO:0000166;GO:0000287;GO:0004765;GO:0005524;GO:0005737;GO:0008652;GO:0009073;GO:0009423;GO:0016301;GO:0016310;GO:0016740;GO:0046872	K00891	COG0703
A6B5H5	Long-chain fatty acid transport protein OS=Vibrio parahaemolyticus serotype O3:K6 (strain AQ3810) GN=A79_4399 PE=4 SV=1	1.5	0.861	0.574	-0.800877	down	-	K06076	COG2067
A6AZX7	3-ketoacyl-CoA thiolase OS=Vibrio parahaemolyticus serotype O3:K6 (strain AQ3810) GN=fadI PE=3 SV=1	1.497	0.958	0.639947	-0.643977	down	GO:0003824;GO:0003988;GO:0005737;GO:0006629;GO:0006631;GO:0006635;GO:0008152;GO:0016042;GO:0016740;GO:0016746;GO:0016747	K00632	COG0183
A6B527	Diaminopimelate decarboxylase OS=Vibrio parahaemolyticus serotype O3:K6 (strain AQ3810) GN=lysA PE=3 SV=1	0.723	1.109	1.53389	0.617192	up	GO:0003824;GO:0008652;GO:0008836;GO:0009085;GO:0009089;GO:0016829;GO:0016831;GO:0030170	K01586	COG0019
A6B9K5	Uncharacterized protein OS=Vibrio parahaemolyticus serotype O3:K6 (strain AQ3810) GN=A79_1205 PE=4 SV=1	1.394	0.844	0.605452	-0.723916	down	GO:0016020;GO:0016021	K09908	COG3105
A6AWY7	L-threonine 3-dehydrogenase OS=Vibrio parahaemolyticus serotype O3:K6 (strain AQ3810) GN=tdh PE=3 SV=1	0.682	1.038	1.52199	0.605963	up	GO:0005737;GO:0006567;GO:0008270;GO:0008743;GO:0016491;GO:0019518;GO:0046872;GO:0055114	K00060	COG1063
A6B8K2	Glutathione-disulfide reductase (Fragment) OS=Vibrio parahaemolyticus serotype O3:K6 (strain AQ3810) GN=gor PE=3 SV=1	0.69	1.098	1.5913	0.67021	up	GO:0004362;GO:0005623;GO:0006749;GO:0016491;GO:0016668;GO:0045454;GO:0050660;GO:0050661;GO:0055114;GO:0098869	K00383	COG1249
A6AY91	Multiphosphoryl transfer protein (MTP) (Phosphotransferase FPrprotein) (Pseudo-HPr) OS=Vibrio parahaemolyticus serotype O3:K6 (strain AQ3810) GN=A79_1487 PE=4 SV=1	0.74	1.237	1.67162	0.741248	up	GO:0005215;GO:0005737;GO:0006810;GO:0009401;GO:0016301;GO:0016310;GO:0016740	K11183	COG1925;COG4668
A6BA92	Fructose-bisphosphate aldolase, class II (Fragment) OS=Vibrio parahaemolyticus serotype O3:K6 (strain AQ3810) GN=fbaA PE=3 SV=1	0.594	1.153	1.94108	0.956858	up	GO:0003824;GO:0004332;GO:0005975;GO:0006096;GO:0008270;GO:0016829;GO:0016832;GO:0046872	K01624	COG0191
A6B5L0	Regulator of sigma D OS=Vibrio parahaemolyticus serotype O3:K6 (strain AQ3810) GN=A79_4008 PE=3 SV=1	0.643	1.011	1.57232	0.652892	up	GO:0006351;GO:0006355	K07740	COG3160
A6B9G2	Ribose-5-phosphate isomerase A OS=Vibrio parahaemolyticus serotype O3:K6 (strain AQ3810) GN=rpiA PE=3 SV=1	0.525	0.915	1.74286	0.801454	up	GO:0004751;GO:0006098;GO:0009052;GO:0016853	K01807	COG0120
A6B8R0	Tryptophan--tRNA ligase OS=Vibrio parahaemolyticus serotype O3:K6 (strain AQ3810) GN=trpS PE=3 SV=1	0.665	1.059	1.59248	0.671276	up	GO:0000166;GO:0004812;GO:0004830;GO:0005524;GO:0005737;GO:0006412;GO:0006418;GO:0006436;GO:0016874	K01867	COG0180
A6BAV7	Glutathione reductase (Fragment) OS=Vibrio parahaemolyticus serotype O3:K6 (strain AQ3810) GN=A79_0750 PE=4 SV=1	0.672	1.097	1.63244	0.70703	up	GO:0004362;GO:0005623;GO:0016491;GO:0045454;GO:0050660;GO:0055114;GO:0098869	K00383	COG1249
A6B311	Protein TolB OS=Vibrio parahaemolyticus serotype O3:K6 (strain AQ3810) GN=tolB PE=3 SV=1	0.563	0.923	1.63943	0.713196	up	GO:0006810;GO:0015031;GO:0017038;GO:0042597	K03641	COG0823
A6B4K4	Methyl-accepting chemotaxis protein OS=Vibrio parahaemolyticus serotype O3:K6 (strain AQ3810) GN=A79_5060 PE=4 SV=1	1.545	1.002	0.648544	-0.624724	down	GO:0016020;GO:0016021	-	-
A6AZZ3	Chemotaxis protein CheW OS=Vibrio parahaemolyticus serotype O3:K6 (strain AQ3810) GN=A79_2634 PE=4 SV=1	0.639	0.985	1.54147	0.624308	up	GO:0004871;GO:0006935;GO:0007165	K03408	COG0835
A6B1W5	Outer membrane protein W OS=Vibrio parahaemolyticus serotype O3:K6 (strain AQ3810) GN=A79_5940 PE=4 SV=1	1.189	0.744	0.625736	-0.676374	down	GO:0016021;GO:0019867	K07275	COG3047
A6B9B7	30S ribosomal protein S4 OS=Vibrio parahaemolyticus serotype O3:K6 (strain AQ3810) GN=rpsD PE=3 SV=1	0.405	1.007	2.48642	1.31407	up	GO:0003723;GO:0003735;GO:0005622;GO:0005840;GO:0006412;GO:0015935;GO:0019843;GO:0030529	K02986	COG0522
A6B9I7	30S ribosomal protein S3 OS=Vibrio parahaemolyticus serotype O3:K6 (strain AQ3810) GN=rpsC PE=3 SV=1	0.557	0.906	1.62657	0.701834	up	GO:0003676;GO:0003723;GO:0003729;GO:0003735;GO:0005840;GO:0006412;GO:0015935;GO:0019843;GO:0030529	K02982	COG0092
A6B5Z8	16 kDa heat shock protein A OS=Vibrio parahaemolyticus serotype O3:K6 (strain AQ3810) GN=A79_3903 PE=3 SV=1	0.685	1.297	1.89343	0.921003	up	-	K04080	COG0071
A6B1F2	Trimethylamine-N-oxide reductase c-type cytochrome TorC OS=Vibrio parahaemolyticus serotype O3:K6 (strain AQ3810) GN=torC PE=4 SV=1	1.454	0.938	0.645117	-0.632367	down	GO:0005506;GO:0009055;GO:0009276;GO:0016020;GO:0016021;GO:0020037	K03532	COG3005
A6B1F6	Inorganic diphosphatase OS=Vibrio parahaemolyticus serotype O3:K6 (strain AQ3810) GN=A79_0160 PE=4 SV=1	0.62	1.103	1.77903	0.831093	up	GO:0005737;GO:0016462;GO:0016787;GO:0046872	K15986	COG1227
A6B7Y9	Elongation factor P-like protein OS=Vibrio parahaemolyticus serotype O3:K6 (strain AQ3810) GN=A79_3822 PE=3 SV=1	0.773	1.179	1.52523	0.609023	up	GO:0003746;GO:0005737;GO:0006414;GO:0043043	K02356	COG0231
A6B5K1	DNA-binding protein HU-beta OS=Vibrio parahaemolyticus serotype O3:K6 (strain AQ3810) GN=A79_3999 PE=3 SV=1	0.296	0.985	3.3277	1.73453	up	GO:0003677;GO:0030261	K05787	COG0776
A6B9I4	Ribosomal protein L2 (Fragment) OS=Vibrio parahaemolyticus serotype O3:K6 (strain AQ3810) GN=rplB PE=4 SV=1	0.449	0.994	2.21381	1.14653	up	GO:0003723;GO:0003735;GO:0005622;GO:0005840;GO:0006412;GO:0015934;GO:0016740	K02886	-
A6B5B0	Adenosine deaminase OS=Vibrio parahaemolyticus serotype O3:K6 (strain AQ3810) GN=add PE=3 SV=1	0.619	0.955	1.54281	0.625561	up	GO:0004000;GO:0008270;GO:0009117;GO:0009168;GO:0016787;GO:0019239;GO:0046872	K01488	COG1816
A6AZX3	Phosphohistidine phosphatase SixA OS=Vibrio parahaemolyticus serotype O3:K6 (strain AQ3810) GN=sixA PE=4 SV=1	1.303	0.861	0.660783	-0.597752	down	GO:0005737;GO:0006464;GO:0008969;GO:0016311;GO:0016787	K08296	COG2062
A6B2P1	2',3'-cyclic-nucleotide 2'-phosphodiesterase OS=Vibrio parahaemolyticus serotype O3:K6 (strain AQ3810) GN=cpdB PE=3 SV=1	0.453	0.764	1.68653	0.754062	up	GO:0000166;GO:0008663;GO:0009117;GO:0009166;GO:0016787;GO:0016788;GO:0046872	K01119	COG0737
A6B5Q7	Chaperone SurA OS=Vibrio parahaemolyticus serotype O3:K6 (strain AQ3810) GN=surA PE=3 SV=1	0.485	1.049	2.16289	1.11296	up	GO:0000413;GO:0003755;GO:0006457;GO:0016853;GO:0030288;GO:0042277;GO:0042597;GO:0043165;GO:0050821;GO:0051082;GO:0051085;GO:0060274	K03771	COG0760
A6B140	Uncharacterized protein OS=Vibrio parahaemolyticus serotype O3:K6 (strain AQ3810) GN=A79_6104 PE=4 SV=1	1.692	1.125	0.664894	-0.588805	down	-	-	COG5633
A6B9I6	50S ribosomal protein L22 OS=Vibrio parahaemolyticus serotype O3:K6 (strain AQ3810) GN=rplV PE=3 SV=1	0.376	1.153	3.06649	1.61659	up	GO:0003723;GO:0003735;GO:0005622;GO:0005840;GO:0006412;GO:0015934;GO:0019843;GO:0030529	K02890	COG0091
A6B6U3	RNA chaperone ProQ OS=Vibrio parahaemolyticus serotype O3:K6 (strain AQ3810) GN=proQ PE=3 SV=1	0.51	1.084	2.12549	1.0878	up	GO:0003723;GO:0005737;GO:0010608;GO:0033592;GO:0034057	K03607	COG3109
A6B5I5	Isopenicillin N synthase OS=Vibrio parahaemolyticus serotype O3:K6 (strain AQ3810) GN=A79_4409 PE=3 SV=1	0.54	0.871	1.61296	0.689713	up	GO:0016491;GO:0046872;GO:0055114	-	COG3491
A6AZ90	ABC-type proline/glycine betaine transport system, periplasmic component OS=Vibrio parahaemolyticus serotype O3:K6 (strain AQ3810) GN=A79_4502 PE=4 SV=1	0.183	0.403	2.20219	1.13894	up	GO:0005215;GO:0006810;GO:0015871;GO:0033265;GO:0042597	K02002	COG2113
A6B9H1	30S ribosomal protein S8 OS=Vibrio parahaemolyticus serotype O3:K6 (strain AQ3810) GN=rpsH PE=3 SV=1	0.6	1.184	1.97333	0.980635	up	GO:0003723;GO:0003735;GO:0005840;GO:0006412;GO:0019843;GO:0030529	K02994	COG0096
A6B9V6	Dihydropteroate synthase OS=Vibrio parahaemolyticus serotype O3:K6 (strain AQ3810) GN=folP PE=3 SV=1	0.781	1.187	1.51985	0.603925	up	GO:0004156;GO:0009396;GO:0016740;GO:0042558;GO:0044237;GO:0046654;GO:0046656;GO:0046872	K00796	COG0294
A6B254	Protein GrpE OS=Vibrio parahaemolyticus serotype O3:K6 (strain AQ3810) GN=grpE PE=3 SV=1	0.439	1.242	2.82916	1.50037	up	GO:0000774;GO:0005737;GO:0006457;GO:0042803;GO:0050790;GO:0051087	K03687	COG0576
A6B5E9	Glutathione S-transferase OS=Vibrio parahaemolyticus serotype O3:K6 (strain AQ3810) GN=A79_4684 PE=4 SV=1	0.431	0.951	2.2065	1.14176	up	GO:0016740	K11209	COG0625
A6B7D3	Ribonucleoside-diphosphate reductase, beta subunit OS=Vibrio parahaemolyticus serotype O3:K6 (strain AQ3810) GN=A79_6381 PE=4 SV=1	0.562	1.033	1.83808	0.878198	up	GO:0004748;GO:0009186;GO:0016491;GO:0055114	K00526	COG0208
A6B2F7	Molydopterin dinucleotide-binding region OS=Vibrio parahaemolyticus serotype O3:K6 (strain AQ3810) GN=A79_4783 PE=3 SV=1	0.884	1.343	1.51923	0.603341	up	GO:0016491;GO:0030151;GO:0046872;GO:0051536;GO:0051539;GO:0055114	K08357	COG0243
A6B195	Outer membrane protein OS=Vibrio parahaemolyticus serotype O3:K6 (strain AQ3810) GN=A79_1878 PE=4 SV=1	0.975	2.205	2.26154	1.1773	up	-	-	COG3203
A6B112	Arginine/ornithine transport ATP-binding protein AotP OS=Vibrio parahaemolyticus serotype O3:K6 (strain AQ3810) GN=A79_6076 PE=4 SV=1	1.456	0.964	0.662088	-0.594905	down	GO:0000166;GO:0003333;GO:0005524;GO:0015424;GO:0016887	K10025	COG4598
A6B8V8	Signal recognition particle receptor FtsY OS=Vibrio parahaemolyticus serotype O3:K6 (strain AQ3810) GN=ftsY PE=3 SV=1	0.579	0.983	1.69775	0.763628	up	GO:0000166;GO:0003924;GO:0005525;GO:0005737;GO:0005886;GO:0006612;GO:0006614;GO:0016020;GO:0031226;GO:0051301	K03110	COG0552
A6B5P9	GTP-binding protein Obg/CgtA (Fragment) OS=Vibrio parahaemolyticus serotype O3:K6 (strain AQ3810) GN=A79_2408 PE=3 SV=1	0.62	0.986	1.59032	0.669319	up	GO:0000287;GO:0003924;GO:0005525	K03979	COG0536
A6B3R6	DNA-binding protein OS=Vibrio parahaemolyticus serotype O3:K6 (strain AQ3810) GN=A79_3867 PE=3 SV=1	0.326	1.01	3.09816	1.63141	up	GO:0003677;GO:0005622;GO:0006355;GO:0046983	K03746	COG2916
A6B504	S-ribosylhomocysteine lyase OS=Vibrio parahaemolyticus serotype O3:K6 (strain AQ3810) GN=luxS PE=3 SV=1	0.575	1.015	1.76522	0.819846	up	GO:0003824;GO:0005506;GO:0009372;GO:0016829;GO:0043768;GO:0046872	K07173	COG1854
A6B5C6	Phospholipase, patatin family OS=Vibrio parahaemolyticus serotype O3:K6 (strain AQ3810) GN=A79_1711 PE=4 SV=1	1.383	0.744	0.537961	-0.894427	down	GO:0006629;GO:0008152	-	COG4667
A6B523	Porphobilinogen deaminase OS=Vibrio parahaemolyticus serotype O3:K6 (strain AQ3810) GN=hemC PE=3 SV=1	0.538	0.947	1.76022	0.815758	up	GO:0004418;GO:0006779;GO:0006782;GO:0016740;GO:0018160;GO:0033014	K01749	COG0181
A6B6X9	Translation initiation factor IF-3 OS=Vibrio parahaemolyticus serotype O3:K6 (strain AQ3810) GN=infC PE=3 SV=1	0.616	1.018	1.6526	0.724735	up	GO:0003743;GO:0005737;GO:0006412;GO:0006413	K02520	COG0290
A6B7Y4	Nitrogen regulatory protein P-II OS=Vibrio parahaemolyticus serotype O3:K6 (strain AQ3810) GN=A79_3370 PE=3 SV=1	0.449	0.953	2.12249	1.08576	up	GO:0006351;GO:0006355;GO:0006808;GO:0030234;GO:0050790	K04751	COG0347
A6B029	TyrA protein OS=Vibrio parahaemolyticus serotype O3:K6 (strain AQ3810) GN=A79_2670 PE=4 SV=1	0.676	1.048	1.5503	0.632544	up	GO:0004601;GO:0020037;GO:0055114;GO:0098869	K07223	COG2837
A6B9I8	50S ribosomal protein L16 OS=Vibrio parahaemolyticus serotype O3:K6 (strain AQ3810) GN=rplP PE=3 SV=1	0.383	1.157	3.02089	1.59497	up	GO:0000049;GO:0003723;GO:0003735;GO:0005622;GO:0005840;GO:0006412;GO:0019843;GO:0030529	K02878	COG0197
A6B8C7	Single-stranded DNA-binding protein OS=Vibrio parahaemolyticus serotype O3:K6 (strain AQ3810) GN=A79_6320 PE=3 SV=1	0.662	1.025	1.54834	0.630721	up	GO:0003677;GO:0003697;GO:0006260;GO:0006281;GO:0006310;GO:0006974	K03111	COG0629
A6B2S4	Octaprenyl-diphosphate synthase (Fragment) OS=Vibrio parahaemolyticus serotype O3:K6 (strain AQ3810) GN=A79_0858 PE=3 SV=1	0.637	1.042	1.63579	0.70999	up	GO:0008299;GO:0016740	K02523	COG0142
A6B2K6	TonB-dependent receptor OS=Vibrio parahaemolyticus serotype O3:K6 (strain AQ3810) GN=A79_0047 PE=3 SV=1	1.476	0.965	0.653794	-0.613092	down	GO:0004872;GO:0006810;GO:0009279;GO:0016020	K02014	COG1629
A6B4J3	Ferredoxin, 2Fe-2S type, ISC system OS=Vibrio parahaemolyticus serotype O3:K6 (strain AQ3810) GN=fdx PE=4 SV=1	0.669	1.044	1.56054	0.642044	up	GO:0009055;GO:0046872;GO:0051536;GO:0051537	K04755	COG0633
A6B2N6	Peptidyl-prolyl cis-trans isomerase OS=Vibrio parahaemolyticus serotype O3:K6 (strain AQ3810) GN=A79_0820 PE=4 SV=1	0.791	1.19	1.50442	0.589212	up	GO:0000413;GO:0003755;GO:0006457;GO:0016853	K03773	COG0545
A6B352	Isocitrate lyase OS=Vibrio parahaemolyticus serotype O3:K6 (strain AQ3810) GN=aceA PE=4 SV=1	0.878	1.365	1.55467	0.636608	up	GO:0003824;GO:0004451;GO:0008152;GO:0016829;GO:0019752	K01637	COG2224
A6AZT6	Putative AcrA/AcrE family protein OS=Vibrio parahaemolyticus serotype O3:K6 (strain AQ3810) GN=A79_3160 PE=3 SV=1	1.299	0.862	0.663587	-0.591642	down	GO:0016020;GO:0016021;GO:0055085	-	COG0845
A6AZ46	Electron transfer flavoprotein, beta-subunit OS=Vibrio parahaemolyticus serotype O3:K6 (strain AQ3810) GN=A79_4458 PE=4 SV=1	1.252	0.817	0.652556	-0.615827	down	GO:0009055	K03521	COG2086
A6AYW9	Uncharacterized protein OS=Vibrio parahaemolyticus serotype O3:K6 (strain AQ3810) GN=A79_6200 PE=4 SV=1	0.583	1.356	2.3259	1.21779	up	GO:0008152;GO:0016787	-	COG2195
A6AZ45	Electron transfer flavoprotein, alpha-subunit OS=Vibrio parahaemolyticus serotype O3:K6 (strain AQ3810) GN=A79_4457 PE=4 SV=1	1.366	0.849	0.621523	-0.686121	down	GO:0009055;GO:0050660	K03522	COG2025
A6B296	Extracellular tungstate binding protein OS=Vibrio parahaemolyticus serotype O3:K6 (strain AQ3810) GN=A79_5108 PE=4 SV=1	0.411	0.912	2.21898	1.1499	up	-	K05772	COG2998
A6BCC2	Uncharacterized protein (Fragment) OS=Vibrio parahaemolyticus serotype O3:K6 (strain AQ3810) GN=A79_5586 PE=4 SV=1	1.257	0.81	0.644391	-0.633991	down	-	K07459	-
A6B1S6	Dihydrolipoamide acetyltransferase OS=Vibrio parahaemolyticus serotype O3:K6 (strain AQ3810) GN=A79_5300 PE=3 SV=1	1.524	0.909	0.596457	-0.745511	down	GO:0008152;GO:0016740;GO:0016746	K00627	COG0508
A6BAR9	1-(5-phosphoribosyl)-5-[(5-phosphoribosylamino)methylideneamino] imidazole-4-carboxamide isomerase (Fragment) OS=Vibrio parahaemolyticus serotype O3:K6 (strain AQ3810) GN=A79_2470 PE=3 SV=1	1.201	0.797	0.663614	-0.591585	down	GO:0000105;GO:0003824;GO:0003949;GO:0005737;GO:0006810;GO:0008152;GO:0008652;GO:0016020;GO:0016021;GO:0016853	K01814	COG0106
A6B222	Peptide deformylase OS=Vibrio parahaemolyticus serotype O3:K6 (strain AQ3810) GN=def PE=3 SV=1	0.498	1.045	2.09839	1.06929	up	GO:0005506;GO:0006412;GO:0016787;GO:0042586;GO:0046872	K01462	COG0242
A6B8B1	ABC-type dipeptide transport system, periplasmic component OS=Vibrio parahaemolyticus serotype O3:K6 (strain AQ3810) GN=A79_5914 PE=4 SV=1	0.53	0.963	1.81698	0.861543	up	GO:0043190;GO:0055085	K13893	COG4166;COG0747
A6BAY4	30S ribosomal protein S9 OS=Vibrio parahaemolyticus serotype O3:K6 (strain AQ3810) GN=rpsI PE=3 SV=1	0.441	0.935	2.12018	1.08419	up	GO:0003735;GO:0005840;GO:0006412;GO:0030529	K02996	COG0103
A6B6M9	Toluene tolerance protein Ttg2D OS=Vibrio parahaemolyticus serotype O3:K6 (strain AQ3810) GN=ttg2D PE=4 SV=1	0.47	1.113	2.36809	1.24372	up	-	K07323	COG2854
A6BAY5	50S ribosomal protein L13 OS=Vibrio parahaemolyticus serotype O3:K6 (strain AQ3810) GN=rplM PE=3 SV=1	0.47	1.144	2.43404	1.28335	up	GO:0003735;GO:0005840;GO:0006412;GO:0030529	K02871	COG0102
A6B970	Bifunctional protein PutA (Fragment) OS=Vibrio parahaemolyticus serotype O3:K6 (strain AQ3810) GN=A79_1686 PE=4 SV=1	1.58	0.892	0.564557	-0.824809	down	GO:0004657;GO:0008152;GO:0016491;GO:0016620;GO:0055114	K13821	-
A6B313	Tol system periplasmic component YbgF OS=Vibrio parahaemolyticus serotype O3:K6 (strain AQ3810) GN=A79_2435 PE=4 SV=1	0.529	0.978	1.84877	0.886567	up	GO:0070206	-	COG1729
A6B081	Zinc-carboxypeptidase OS=Vibrio parahaemolyticus serotype O3:K6 (strain AQ3810) GN=A79_2821 PE=4 SV=1	0.485	1.016	2.09485	1.06684	up	GO:0004180;GO:0004181;GO:0006508;GO:0008270	-	COG2866
A6B8G1	SH3 domain protein OS=Vibrio parahaemolyticus serotype O3:K6 (strain AQ3810) GN=A79_1763 PE=4 SV=1	0.573	0.905	1.57941	0.659383	up	GO:0016020;GO:0016021	K07184	COG3103
A6B420	Protein YbbN OS=Vibrio parahaemolyticus serotype O3:K6 (strain AQ3810) GN=A79_2302 PE=4 SV=1	0.669	1.12	1.67414	0.743421	up	GO:0005623;GO:0006662;GO:0015035;GO:0045454;GO:0055114	K05838	COG3118
A6AZ95	Band 7 protein OS=Vibrio parahaemolyticus serotype O3:K6 (strain AQ3810) GN=A79_4507 PE=4 SV=1	1.567	1.04	0.663689	-0.591422	down	GO:0016020	-	COG0330
A6B0K7	Acetyl-CoA acetyltransferase OS=Vibrio parahaemolyticus serotype O3:K6 (strain AQ3810) GN=A79_3720 PE=3 SV=1	0.918	1.522	1.65795	0.729402	up	GO:0003824;GO:0003985;GO:0008152;GO:0016740;GO:0016746;GO:0016747	K00626	COG0183
A6B0L3	Nitrate reductase OS=Vibrio parahaemolyticus serotype O3:K6 (strain AQ3810) GN=napA PE=3 SV=1	0.86	1.296	1.50698	0.591657	up	GO:0005506;GO:0005576;GO:0006777;GO:0008940;GO:0009055;GO:0016491;GO:0030151;GO:0042128;GO:0042597;GO:0046872;GO:0051536;GO:0051539;GO:0055114	K02567	COG0243
A6B9F9	Uncharacterized protein OS=Vibrio parahaemolyticus serotype O3:K6 (strain AQ3810) GN=A79_2931 PE=4 SV=1	0.679	1.126	1.65832	0.729723	up	-	K09807	COG2968
A6B2D1	Isochorismatase family protein OS=Vibrio parahaemolyticus serotype O3:K6 (strain AQ3810) GN=A79_4756 PE=4 SV=1	1.631	0.795	0.487431	-1.03673	down	GO:0003824;GO:0008152	-	COG1335
A6AX68	Mannose-6-phosphate isomerase OS=Vibrio parahaemolyticus serotype O3:K6 (strain AQ3810) GN=manA PE=3 SV=1	0.509	0.897	1.76228	0.817442	up	GO:0004476;GO:0005975;GO:0008270;GO:0009298;GO:0016853;GO:0046872	K01809	COG1482
A6BBH4	50S ribosomal protein L7/L12 OS=Vibrio parahaemolyticus serotype O3:K6 (strain AQ3810) GN=rplL PE=3 SV=1	0.383	0.641	1.67363	0.74298	up	GO:0003735;GO:0005622;GO:0005840;GO:0006412;GO:0030529	K02935	COG0222
A6B4I9	Dual-specificity RNA methyltransferase RlmN OS=Vibrio parahaemolyticus serotype O3:K6 (strain AQ3810) GN=rlmN PE=3 SV=1	0.686	1.033	1.50583	0.59056	up	GO:0000049;GO:0002935;GO:0003824;GO:0005737;GO:0006364;GO:0008033;GO:0008168;GO:0008173;GO:0016740;GO:0019843;GO:0030488;GO:0032259;GO:0046872;GO:0051536;GO:0051539;GO:0070040;GO:0070475	K06941	COG0820
A6B485	Transporter OS=Vibrio parahaemolyticus serotype O3:K6 (strain AQ3810) GN=A79_4989 PE=4 SV=1	0.608	1.009	1.65954	0.730783	up	-	-	COG1434;COG0457
A6B3V2	Nucleoside permease OS=Vibrio parahaemolyticus serotype O3:K6 (strain AQ3810) GN=A79_2961 PE=3 SV=1	1.425	0.871	0.611228	-0.710217	down	GO:0005337;GO:0006810;GO:0016020;GO:0016021;GO:1901642	K03317	COG1972
A6B2B9	Putrescine-binding periplasmic protein OS=Vibrio parahaemolyticus serotype O3:K6 (strain AQ3810) GN=A79_5131 PE=3 SV=1	0.527	1.061	2.01328	1.00955	up	GO:0006810;GO:0015846;GO:0019808;GO:0042597	K11069	COG0687
A6AY84	Amino acid ABC transporter, periplasmic amino acid-binding protein OS=Vibrio parahaemolyticus serotype O3:K6 (strain AQ3810) GN=A79_1480 PE=4 SV=1	0.39	0.727	1.8641	0.898481	up	GO:0004970;GO:0016020;GO:0035235	K02030	COG0834
A6B2P3	Sulfate adenylyltransferase subunit 2 OS=Vibrio parahaemolyticus serotype O3:K6 (strain AQ3810) GN=cysD PE=3 SV=1	0.582	1.094	1.87973	0.910522	up	GO:0000103;GO:0000166;GO:0003824;GO:0004781;GO:0005524;GO:0008152;GO:0016740;GO:0016779;GO:0019419;GO:0070814	K00957	COG0175
A6B351	Acetoin utilization AcuB protein OS=Vibrio parahaemolyticus serotype O3:K6 (strain AQ3810) GN=A79_0778 PE=4 SV=1	0.475	0.919	1.93474	0.952137	up	GO:0003824	-	COG0517
A6B3F5	ABC transporter substrate-binding protein OS=Vibrio parahaemolyticus serotype O3:K6 (strain AQ3810) GN=A79_1177 PE=4 SV=1	0.646	0.991	1.53406	0.617351	up	-	K01989	COG2984
A6B6R0	UPF0234 protein A79_3354 OS=Vibrio parahaemolyticus serotype O3:K6 (strain AQ3810) GN=A79_3354 PE=3 SV=1	0.46	0.945	2.05435	1.03868	up	-	K09767	COG1666
A6B7X2	Putative outer membrane protein, Ail and OmpX OS=Vibrio parahaemolyticus serotype O3:K6 (strain AQ3810) GN=A79_2009 PE=4 SV=1	1.641	0.932	0.567946	-0.816173	down	GO:0016021	-	-
A6B4Z7	50S ribosomal protein L19 OS=Vibrio parahaemolyticus serotype O3:K6 (strain AQ3810) GN=rplS PE=3 SV=1	0.422	1.109	2.62796	1.39394	up	GO:0003735;GO:0005622;GO:0005840;GO:0006412;GO:0030529	K02884	COG0335
A6B9B5	50S ribosomal protein L17 OS=Vibrio parahaemolyticus serotype O3:K6 (strain AQ3810) GN=rplQ PE=3 SV=1	0.19	0.926	4.87368	2.28501	up	GO:0003735;GO:0005622;GO:0005840;GO:0006412;GO:0030529	K02879	COG0203
A6B9A6	Ribosomal subunit interface protein OS=Vibrio parahaemolyticus serotype O3:K6 (strain AQ3810) GN=yfiA PE=4 SV=1	0.382	0.934	2.44503	1.28985	up	GO:0044238	K05809	COG1544
A6BA68	Outer membrane lipoprotein OS=Vibrio parahaemolyticus serotype O3:K6 (strain AQ3810) GN=A79_0464 PE=4 SV=1	1.853	0.843	0.454938	-1.13626	down	GO:0019867	K06078	COG4238
A6B4V4	Uncharacterized protein OS=Vibrio parahaemolyticus serotype O3:K6 (strain AQ3810) GN=A79_1383 PE=4 SV=1	0.544	0.954	1.75368	0.810383	up	-	K09948	COG3492
A6B146	SAM-dependent methyltransferase OS=Vibrio parahaemolyticus serotype O3:K6 (strain AQ3810) GN=A79_1829 PE=4 SV=1	1.423	0.859	0.603654	-0.728206	down	GO:0008168;GO:0016740;GO:0032259	-	COG0500
A6B2A8	Formate dehydrogenase iron-sulfur subunit OS=Vibrio parahaemolyticus serotype O3:K6 (strain AQ3810) GN=A79_5120 PE=4 SV=1	0.476	1.181	2.48109	1.31098	up	-	K00124	COG0437
A6B950	Khg/kdpg aldolase OS=Vibrio parahaemolyticus serotype O3:K6 (strain AQ3810) GN=A79_3363 PE=4 SV=1	0.734	1.26	1.71662	0.779572	up	GO:0003824;GO:0008152;GO:0008675;GO:0008700;GO:0016829	K01625	COG0800
A6B0V0	Tyrosine-protein kinase wzc OS=Vibrio parahaemolyticus serotype O3:K6 (strain AQ3810) GN=A79_5413 PE=4 SV=1	0.662	1.069	1.6148	0.691359	up	GO:0004715;GO:0009103;GO:0016020;GO:0016021;GO:0016301;GO:0016310;GO:0016740;GO:0018108;GO:0045226	K16692	COG0489;COG3206
A6B7G2	Chemotaxis protein CheX OS=Vibrio parahaemolyticus serotype O3:K6 (strain AQ3810) GN=A79_5551 PE=4 SV=1	0.602	0.934	1.5515	0.633659	up	-	K03409	COG1406
A6B6U2	C-processing peptidase OS=Vibrio parahaemolyticus serotype O3:K6 (strain AQ3810) GN=prc PE=4 SV=1	0.603	0.94	1.55887	0.640503	up	GO:0006508;GO:0008236;GO:0016787	K03797	COG0793
A6B7U9	Glycosyl transferase, family 39 OS=Vibrio parahaemolyticus serotype O3:K6 (strain AQ3810) GN=A79_2269 PE=4 SV=1	1.488	0.958	0.643817	-0.635277	down	GO:0016020;GO:0016021;GO:0016740	-	COG1807
A6B7A7	Nuclease OS=Vibrio parahaemolyticus serotype O3:K6 (strain AQ3810) GN=A79_2711 PE=4 SV=1	0.571	0.86	1.50613	0.590846	up	GO:0016020;GO:0016021	K07004	COG2374
A6B5G4	Outer membrane protein OS=Vibrio parahaemolyticus serotype O3:K6 (strain AQ3810) GN=A79_3985 PE=3 SV=1	0.523	0.868	1.65966	0.730884	up	GO:0005509;GO:0009279;GO:0016020;GO:0016021	-	COG2885
A6B4P2	Negative modulator of initiation of replication OS=Vibrio parahaemolyticus serotype O3:K6 (strain AQ3810) GN=seqA PE=3 SV=1	0.56	1.031	1.84107	0.880546	up	GO:0003677;GO:0005737;GO:0006355;GO:0008156;GO:0032297	K03645	COG3057
A6BAZ2	tRNA-I(6)A37 thiotransferase enzyme MiaB (Fragment) OS=Vibrio parahaemolyticus serotype O3:K6 (strain AQ3810) GN=miaB PE=4 SV=1	0.589	1.069	1.81494	0.859922	up	GO:0003824;GO:0016740;GO:0043412;GO:0051536;GO:0051539	K06168	COG0621
A6B9I9	50S ribosomal protein L29 OS=Vibrio parahaemolyticus serotype O3:K6 (strain AQ3810) GN=rpmC PE=3 SV=1	0.247	0.7	2.83401	1.50284	up	GO:0003735;GO:0005622;GO:0005840;GO:0006412;GO:0030529	K02904	COG0255
A6B2L4	DNA-directed RNA polymerase subunit omega OS=Vibrio parahaemolyticus serotype O3:K6 (strain AQ3810) GN=rpoZ PE=3 SV=1	0.305	0.876	2.87213	1.52212	up	GO:0003677;GO:0003899;GO:0006351;GO:0016740;GO:0016779	K03060	COG1758
A6B463	Mutator MutT protein OS=Vibrio parahaemolyticus serotype O3:K6 (strain AQ3810) GN=A79_2379 PE=3 SV=1	0.534	0.831	1.55618	0.638009	up	GO:0006281;GO:0008413;GO:0016787	K03574	COG0494
A6B9M4	30S ribosomal protein S10 OS=Vibrio parahaemolyticus serotype O3:K6 (strain AQ3810) GN=rpsJ PE=3 SV=1	0.439	1.118	2.5467	1.34863	up	GO:0000049;GO:0003723;GO:0003735;GO:0005622;GO:0005840;GO:0006412;GO:0030529	K02946	COG0051
A6B9T1	UPF0307 protein A79_0124 OS=Vibrio parahaemolyticus serotype O3:K6 (strain AQ3810) GN=A79_0124 PE=3 SV=1	0.345	0.979	2.83768	1.50471	up	-	K09889	COG3028
A6B2A4	Iron-sulfur cluster-binding protein OS=Vibrio parahaemolyticus serotype O3:K6 (strain AQ3810) GN=A79_5116 PE=4 SV=1	0.694	1.144	1.64841	0.721079	up	GO:0046872;GO:0051536;GO:0051539	-	COG1145
A6B6X7	50S ribosomal protein L20 OS=Vibrio parahaemolyticus serotype O3:K6 (strain AQ3810) GN=rplT PE=3 SV=1	0.341	0.96	2.81525	1.49326	up	GO:0000027;GO:0003723;GO:0003735;GO:0005622;GO:0005840;GO:0006412;GO:0019843;GO:0030529	K02887	COG0292
A6AX32	Phosphate ABC transporter, periplasmic phosphate-binding protein OS=Vibrio parahaemolyticus serotype O3:K6 (strain AQ3810) GN=A79_0472 PE=4 SV=1	0.906	5.549	6.12472	2.61464	up	GO:0006810	K02040	COG0226
A6B4S6	Peptide ABC transporter, permease protein OS=Vibrio parahaemolyticus serotype O3:K6 (strain AQ3810) GN=A79_6280 PE=3 SV=1	1.747	1.123	0.642816	-0.637522	down	GO:0005886;GO:0006810;GO:0016020;GO:0016021	K02034	COG1173
A6B4W7	Nucleoid-associated protein A79_3053 OS=Vibrio parahaemolyticus serotype O3:K6 (strain AQ3810) GN=A79_3053 PE=3 SV=1	0.604	0.947	1.56788	0.648816	up	GO:0003677;GO:0005737;GO:0009295;GO:0043590	K09747	COG0718
A6B8J6	Ribonuclease 3 OS=Vibrio parahaemolyticus serotype O3:K6 (strain AQ3810) GN=rnc PE=3 SV=1	0.616	1.104	1.79221	0.841738	up	GO:0003723;GO:0004518;GO:0004519;GO:0004525;GO:0005737;GO:0006364;GO:0006396;GO:0006397;GO:0008033;GO:0016075;GO:0016787;GO:0019843;GO:0046872;GO:0090305;GO:0090501;GO:0090502	K03685	COG0571
A6B5H7	Zn-dependent protease with chaperone function OS=Vibrio parahaemolyticus serotype O3:K6 (strain AQ3810) GN=A79_4401 PE=3 SV=1	0.632	0.987	1.56171	0.643126	up	GO:0004222;GO:0006508;GO:0008233;GO:0008237;GO:0016787	-	COG0501
A6B7L0	Acetyl-CoA carboxylase, biotin carboxyl carrier protein OS=Vibrio parahaemolyticus serotype O3:K6 (strain AQ3810) GN=accB PE=4 SV=1	0.223	0.386	1.73094	0.791557	up	GO:0003989;GO:0006633;GO:0009317	K02160	COG0511
A6BBS4	Malonyl CoA-acyl carrier protein transacylase (Fragment) OS=Vibrio parahaemolyticus serotype O3:K6 (strain AQ3810) GN=A79_0817 PE=4 SV=1	0.55	1.011	1.83818	0.878279	up	GO:0004314;GO:0008152;GO:0016740;GO:0016746	K00645	-
A6B9J0	30S ribosomal protein S17 OS=Vibrio parahaemolyticus serotype O3:K6 (strain AQ3810) GN=rpsQ PE=3 SV=1	0.335	1.034	3.08657	1.626	up	GO:0003723;GO:0003735;GO:0005622;GO:0005840;GO:0006412;GO:0019843;GO:0030529	K02961	COG0186
A6AX87	CpsD OS=Vibrio parahaemolyticus serotype O3:K6 (strain AQ3810) GN=A79_0527 PE=4 SV=1	0.706	1.087	1.53966	0.622612	up	GO:0009103;GO:0016020;GO:0016021;GO:0045226	-	COG0489;COG3206
A6B423	Outer membrane porin, OprD family OS=Vibrio parahaemolyticus serotype O3:K6 (strain AQ3810) GN=A79_2305 PE=4 SV=1	1.529	0.842	0.550687	-0.860696	down	-	-	-
A6B026	Flagellin OS=Vibrio parahaemolyticus serotype O3:K6 (strain AQ3810) GN=A79_2667 PE=3 SV=1	0.683	1.121	1.64129	0.714829	up	GO:0005198;GO:0005576;GO:0009288;GO:0009420;GO:0044781;GO:0071973	K02406	COG1344
A6B7V2	WbnF (Fragment) OS=Vibrio parahaemolyticus serotype O3:K6 (strain AQ3810) GN=A79_2272 PE=4 SV=1	1.449	0.948	0.654244	-0.612099	down	GO:0003824;GO:0005975;GO:0016857;GO:0050662	K08679	COG0451
A6B447	Iron binding protein FbpA (Fragment) OS=Vibrio parahaemolyticus serotype O3:K6 (strain AQ3810) GN=A79_5371 PE=4 SV=1	0.568	1.246	2.19366	1.13334	up	GO:0046872	K02012	COG1840
A6B9C7	Ferroxidase OS=Vibrio parahaemolyticus serotype O3:K6 (strain AQ3810) GN=bfr PE=3 SV=1	1.907	1.139	0.597273	-0.743537	down	GO:0004322;GO:0005623;GO:0006826;GO:0006879;GO:0008199;GO:0046872;GO:0055114	K03594	COG2193
A6B027	Flagellin OS=Vibrio parahaemolyticus serotype O3:K6 (strain AQ3810) GN=A79_2668 PE=3 SV=1	0.726	1.266	1.7438	0.802236	up	GO:0005198;GO:0005576;GO:0009288;GO:0009420;GO:0044781;GO:0071973	K02406	COG1344
A6B1T2	Uncharacterized protein OS=Vibrio parahaemolyticus serotype O3:K6 (strain AQ3810) GN=A79_5306 PE=4 SV=1	0.347	0.556	1.60231	0.680149	up	-	K09796	COG2847
A6B6Y3	Sporulation-control protein OS=Vibrio parahaemolyticus serotype O3:K6 (strain AQ3810) GN=A79_1225 PE=4 SV=1	0.762	1.153	1.51312	0.59753	up	-	K06377	COG4326
A6B9I5	30S ribosomal protein S19 OS=Vibrio parahaemolyticus serotype O3:K6 (strain AQ3810) GN=rpsS PE=3 SV=1	0.191	1.256	6.57592	2.71719	up	GO:0003723;GO:0003735;GO:0005840;GO:0006412;GO:0015935;GO:0019843;GO:0030529	K02965	COG0185
A6B724	Oxygen-insensitive NAD(P)H nitroreductase OS=Vibrio parahaemolyticus serotype O3:K6 (strain AQ3810) GN=A79_5692 PE=4 SV=1	0.6	1.079	1.79833	0.84666	up	GO:0004155;GO:0016491;GO:0055114	K10679	COG0778
A6B9B8	30S ribosomal protein S11 OS=Vibrio parahaemolyticus serotype O3:K6 (strain AQ3810) GN=rpsK PE=3 SV=1	0.422	0.835	1.97867	0.984533	up	GO:0003723;GO:0003735;GO:0005622;GO:0005840;GO:0006412;GO:0019843;GO:0030529	K02948	COG0100
A6B4F2	Chromosome partition protein MukF OS=Vibrio parahaemolyticus serotype O3:K6 (strain AQ3810) GN=mukF PE=3 SV=1	0.682	1.026	1.5044	0.589187	up	GO:0005509;GO:0005737;GO:0006260;GO:0007049;GO:0007059;GO:0009295;GO:0030261;GO:0051301	K03633	COG3006
A6B9H2	30S ribosomal protein S14 OS=Vibrio parahaemolyticus serotype O3:K6 (strain AQ3810) GN=rpsN PE=3 SV=1	0.353	0.997	2.82436	1.49793	up	GO:0003723;GO:0003735;GO:0005622;GO:0005840;GO:0006412;GO:0019843;GO:0030529	K02954	COG0199
A6B516	Methylglyoxal synthase OS=Vibrio parahaemolyticus serotype O3:K6 (strain AQ3810) GN=mgsA PE=3 SV=1	0.606	1.068	1.76238	0.817522	up	GO:0008929;GO:0016829;GO:0019242	K01734	COG1803
A6BC48	Malonyl CoA-acyl carrier protein transacylase OS=Vibrio parahaemolyticus serotype O3:K6 (strain AQ3810) GN=A79_1661 PE=4 SV=1	0.632	1.057	1.67247	0.741979	up	GO:0004314;GO:0008152;GO:0016740;GO:0016746	K00645	-
A6B2S8	C4-dicarboxylate-binding periplasmic protein OS=Vibrio parahaemolyticus serotype O3:K6 (strain AQ3810) GN=A79_2316 PE=4 SV=1	0.618	1.556	2.5178	1.33216	up	GO:0006810;GO:0030288	K11688	COG1638
A6BB37	Acetylornithine deacetylase OS=Vibrio parahaemolyticus serotype O3:K6 (strain AQ3810) GN=A79_4554 PE=4 SV=1	0.579	1.056	1.82383	0.866975	up	GO:0006508;GO:0008152;GO:0008237;GO:0008777;GO:0016787	K01438	-
A6B4J5	Co-chaperone protein HscB homolog OS=Vibrio parahaemolyticus serotype O3:K6 (strain AQ3810) GN=hscB PE=3 SV=1	0.769	1.269	1.6502	0.722637	up	GO:0006457;GO:0051087;GO:0051259	K04082	COG1076
A6B092	Hemolysin OS=Vibrio parahaemolyticus serotype O3:K6 (strain AQ3810) GN=A79_2832 PE=4 SV=1	1.583	1.024	0.646873	-0.628446	down	-	K09712	COG3042
A6AX58	Ferrichrome receptor OS=Vibrio parahaemolyticus serotype O3:K6 (strain AQ3810) GN=A79_0498 PE=3 SV=1	1.754	1.007	0.574116	-0.800585	down	GO:0004872;GO:0005506;GO:0006810;GO:0009279;GO:0015891;GO:0016020	K02014	COG1629
A6B7V5	Ribosome-recycling factor OS=Vibrio parahaemolyticus serotype O3:K6 (strain AQ3810) GN=frr PE=3 SV=1	0.384	1.078	2.80729	1.48918	up	GO:0005737;GO:0006412;GO:0006415	K02838	COG0233
A6B0V7	Carboxypeptidase G2 OS=Vibrio parahaemolyticus serotype O3:K6 (strain AQ3810) GN=A79_5420 PE=4 SV=1	0.38	0.847	2.22895	1.15636	up	GO:0004180;GO:0006508;GO:0008152;GO:0016787	K01295	COG0624
A6B482	Peroxiredoxin OS=Vibrio parahaemolyticus serotype O3:K6 (strain AQ3810) GN=ahpC PE=4 SV=1	0.452	0.782	1.73009	0.790846	up	GO:0004601;GO:0006979;GO:0016209;GO:0016491;GO:0051920;GO:0055114;GO:0098869	K03386	COG0450
A6B0D6	PTS system, fructose-specific IIA component OS=Vibrio parahaemolyticus serotype O3:K6 (strain AQ3810) GN=A79_2876 PE=4 SV=1	0.434	0.745	1.71659	0.779545	up	GO:0005215;GO:0006810;GO:0008982;GO:0009401;GO:0016021;GO:0034219	K02768	COG1762
A6B2F5	Tetrathionate reductase, subunit B OS=Vibrio parahaemolyticus serotype O3:K6 (strain AQ3810) GN=A79_4780 PE=4 SV=1	0.704	1.433	2.03551	1.02539	up	-	K08358	COG0437
A6AYX0	Periplasmic oligopeptide-binding protein OS=Vibrio parahaemolyticus serotype O3:K6 (strain AQ3810) GN=A79_6201 PE=4 SV=1	0.568	1.487	2.61796	1.38844	up	GO:0043190;GO:0055085	K15580	COG4166
A6B0S5	ATPase with chaperone activity, ATP-binding subunit OS=Vibrio parahaemolyticus serotype O3:K6 (strain AQ3810) GN=A79_3501 PE=4 SV=1	0.616	0.925	1.50162	0.586523	up	GO:0000166;GO:0005524;GO:0019538	K11907	COG0542
A6BBY6	30S ribosomal protein S18 OS=Vibrio parahaemolyticus serotype O3:K6 (strain AQ3810) GN=rpsR PE=3 SV=1	0.454	1.124	2.47577	1.30788	up	GO:0003723;GO:0003735;GO:0005622;GO:0005840;GO:0006412;GO:0019843;GO:0030529	K02963	COG0238
A6BB35	50S ribosomal protein L27 OS=Vibrio parahaemolyticus serotype O3:K6 (strain AQ3810) GN=rpmA PE=3 SV=1	0.429	0.959	2.23543	1.16055	up	GO:0003735;GO:0005622;GO:0005840;GO:0006412;GO:0030529	K02899	COG0211
A6B8R1	Phosphoglycolate phosphatase OS=Vibrio parahaemolyticus serotype O3:K6 (strain AQ3810) GN=gph PE=3 SV=1	0.554	1.013	1.82852	0.870676	up	GO:0005975;GO:0008152;GO:0008967;GO:0016311;GO:0016787;GO:0046295;GO:0046872	K01091	COG0546
A6B0S6	Uncharacterized protein OS=Vibrio parahaemolyticus serotype O3:K6 (strain AQ3810) GN=A79_3502 PE=4 SV=1	0.361	0.704	1.95014	0.963577	up	-	K11903	COG3157
A6B9G5	Lipopolysaccharide export system protein LptA OS=Vibrio parahaemolyticus serotype O3:K6 (strain AQ3810) GN=yhbN PE=3 SV=1	0.607	0.956	1.57496	0.655314	up	GO:0001530;GO:0006810;GO:0015920;GO:0042597;GO:0043165	K09774	COG1934
A6B9H4	50S ribosomal protein L24 OS=Vibrio parahaemolyticus serotype O3:K6 (strain AQ3810) GN=rplX PE=3 SV=1	0.231	1.144	4.95238	2.30812	up	GO:0003723;GO:0003735;GO:0005622;GO:0005840;GO:0006412;GO:0019843;GO:0030529	K02895	COG0198
A6AYQ6	Anaerobic dimethyl sulfoxide reductase chain A OS=Vibrio parahaemolyticus serotype O3:K6 (strain AQ3810) GN=A79_6135 PE=3 SV=1	0.634	1.122	1.76972	0.823518	up	GO:0009055;GO:0009389;GO:0016491;GO:0030151;GO:0046872;GO:0051536;GO:0051539;GO:0055114	K07306	COG0243
A6AXT7	4-aminobutyrate transaminase OS=Vibrio parahaemolyticus serotype O3:K6 (strain AQ3810) GN=gabT PE=3 SV=1	0.818	1.254	1.53301	0.616365	up	GO:0003824;GO:0003867;GO:0008483;GO:0009448;GO:0016740;GO:0030170	K07250	COG0160
A6B5H3	PhnA protein OS=Vibrio parahaemolyticus serotype O3:K6 (strain AQ3810) GN=A79_4397 PE=4 SV=1	0.623	1.026	1.64687	0.719727	up	-	K06193	COG2824
A6B6K0	30S ribosomal protein S21 OS=Vibrio parahaemolyticus serotype O3:K6 (strain AQ3810) GN=rpsU PE=3 SV=1	0.279	0.973	3.48746	1.80217	up	GO:0003735;GO:0005622;GO:0005840;GO:0006412;GO:0030529	K02970	COG0828
A6B9H5	50S ribosomal protein L14 OS=Vibrio parahaemolyticus serotype O3:K6 (strain AQ3810) GN=A79_1900 PE=3 SV=1	0.58	1.14	1.96552	0.974909	up	GO:0003735;GO:0005840;GO:0006412;GO:0030529	K02874	COG0093
A6B9S9	L-serine dehydratase 1 OS=Vibrio parahaemolyticus serotype O3:K6 (strain AQ3810) GN=A79_5899 PE=4 SV=1	0.66	1.073	1.62576	0.701112	up	GO:0003941;GO:0006094;GO:0016829	K01752	COG1760
A6B0V5	Proton/glutamate symporter OS=Vibrio parahaemolyticus serotype O3:K6 (strain AQ3810) GN=A79_5418 PE=4 SV=1	0.449	1.541	3.43207	1.77908	up	GO:0015293;GO:0016020;GO:0016021;GO:0055085	-	COG1301
A6B883	Integration host factor subunit alpha OS=Vibrio parahaemolyticus serotype O3:K6 (strain AQ3810) GN=ihfA PE=3 SV=1	0.238	1.087	4.56723	2.19132	up	GO:0003677;GO:0006310;GO:0006351;GO:0006355;GO:0006417	K04764	COG0776
A6B998	Protein YciI OS=Vibrio parahaemolyticus serotype O3:K6 (strain AQ3810) GN=A79_3624 PE=4 SV=1	0.381	0.825	2.16535	1.1146	up	-	K09780	COG2350
A6B341	HTH-type transcriptional regulator IscR OS=Vibrio parahaemolyticus serotype O3:K6 (strain AQ3810) GN=iscR PE=3 SV=1	0.554	0.939	1.69495	0.761239	up	GO:0003677;GO:0003690;GO:0003700;GO:0005506;GO:0006351;GO:0006355;GO:0046872;GO:0051536;GO:0051537	K13643	COG1959
A6B2Y1	Fumarate reductase subunit D OS=Vibrio parahaemolyticus serotype O3:K6 (strain AQ3810) GN=frdD PE=3 SV=1	1.611	0.878	0.545003	-0.875664	down	GO:0005886;GO:0006106;GO:0016020;GO:0016021	K00247	COG3080
A6BBS3	3-oxoacyl-[acyl-carrier-protein] reductase OS=Vibrio parahaemolyticus serotype O3:K6 (strain AQ3810) GN=A79_0816 PE=4 SV=1	0.431	1.143	2.65197	1.40707	up	GO:0004316;GO:0016491;GO:0055114	K00059	-
A6B377	Allophanate hydrolase subunit 2 OS=Vibrio parahaemolyticus serotype O3:K6 (strain AQ3810) GN=A79_0226 PE=4 SV=1	1.345	0.847	0.62974	-0.667172	down	GO:0016787	-	COG1984
A6B5X4	Phosphoheptose isomerase OS=Vibrio parahaemolyticus serotype O3:K6 (strain AQ3810) GN=gmhA PE=3 SV=1	1.327	0.885	0.666918	-0.584419	down	GO:0005737;GO:0005975;GO:0008270;GO:0008968;GO:0016853;GO:0030246;GO:0046872;GO:2001061	K12961	COG0279
A6B378	Allophanate hydrolase subunit 1 OS=Vibrio parahaemolyticus serotype O3:K6 (strain AQ3810) GN=A79_0227 PE=4 SV=1	1.336	0.892	0.667665	-0.582804	down	GO:0016787	-	COG2049
A6B646	Thioredoxin OS=Vibrio parahaemolyticus serotype O3:K6 (strain AQ3810) GN=trx PE=3 SV=1	0.237	0.851	3.59072	1.84427	up	GO:0005623;GO:0006662;GO:0015035;GO:0045454;GO:0055114	K03671	COG0526
A6B7X0	Uncharacterized protein OS=Vibrio parahaemolyticus serotype O3:K6 (strain AQ3810) GN=A79_2007 PE=4 SV=1	0.359	0.721	2.00836	1.00602	up	-	-	-
A6B769	Ribonuclease HII OS=Vibrio parahaemolyticus serotype O3:K6 (strain AQ3810) GN=rnhB PE=3 SV=1	0.657	1.066	1.62253	0.698242	up	GO:0003676;GO:0003723;GO:0004518;GO:0004519;GO:0004523;GO:0005737;GO:0006401;GO:0016787;GO:0030145;GO:0046872;GO:0090305;GO:0090502	K03470	COG0164
A6B8M3	Transport-associated OS=Vibrio parahaemolyticus serotype O3:K6 (strain AQ3810) GN=A79_5079 PE=4 SV=1	0.223	0.405	1.81614	0.860878	up	-	-	-
A6B268	Uncharacterized protein OS=Vibrio parahaemolyticus serotype O3:K6 (strain AQ3810) GN=A79_2570 PE=4 SV=1	0.622	1.168	1.87781	0.909054	up	-	-	-
A6AY93	Pts system fructose-specific eiibc component (Eiibc-fru) OS=Vibrio parahaemolyticus serotype O3:K6 (strain AQ3810) GN=A79_1489 PE=4 SV=1	0.727	1.219	1.67675	0.745671	up	GO:0005351;GO:0005886;GO:0006810;GO:0008643;GO:0008982;GO:0009401;GO:0015755;GO:0015992;GO:0016020;GO:0016021;GO:0016740;GO:0022877;GO:0034219;GO:0103111	K02770	COG1445;COG1299
A6B0S1	Protein of avirulence locus OS=Vibrio parahaemolyticus serotype O3:K6 (strain AQ3810) GN=A79_3497 PE=4 SV=1	0.452	0.812	1.79646	0.845157	up	-	K11898	COG4455
A6BCI2	P pilus assembly/Cpx signaling pathway, periplasmic inhibitor/zinc-resistance associated protein (Fragment) OS=Vibrio parahaemolyticus serotype O3:K6 (strain AQ3810) GN=A79_5620 PE=4 SV=1	0.742	1.904	2.56604	1.35954	up	GO:0042597	K06006	COG3678
A6B3T6	30S ribosomal protein S15 OS=Vibrio parahaemolyticus serotype O3:K6 (strain AQ3810) GN=rpsO PE=3 SV=1	0.323	1.124	3.47988	1.79904	up	GO:0003723;GO:0003735;GO:0005622;GO:0005840;GO:0006412;GO:0019843;GO:0030529	K02956	COG0184
A6B9C5	Zn-dependent enzyme from deacylase/carboxypeptidase superfamily OS=Vibrio parahaemolyticus serotype O3:K6 (strain AQ3810) GN=A79_3814 PE=4 SV=1	0.642	1.009	1.57165	0.652281	up	GO:0004180;GO:0004181;GO:0006508;GO:0008270	-	-
A6BAD0	Cytochrome D ubiquinol oxidase subunit 2 (Fragment) OS=Vibrio parahaemolyticus serotype O3:K6 (strain AQ3810) GN=A79_5825 PE=4 SV=1	1.586	0.983	0.619798	-0.690129	down	GO:0016020;GO:0016021;GO:0016491;GO:0055114	K00426	-
A6AYA0	Transcriptional regulator, HTH_3 family OS=Vibrio parahaemolyticus serotype O3:K6 (strain AQ3810) GN=A79_1496 PE=4 SV=1	0.507	0.777	1.53254	0.615929	up	GO:0003677;GO:0043565	-	COG1396
A6B875	LexA repressor (Fragment) OS=Vibrio parahaemolyticus serotype O3:K6 (strain AQ3810) GN=lexA PE=3 SV=1	0.638	1.058	1.65831	0.729711	up	GO:0003677;GO:0004252;GO:0006260;GO:0006281;GO:0006351;GO:0006355;GO:0006508;GO:0006974;GO:0009432;GO:0016787;GO:0045892	K01356	COG1974
A6B212	Glycogen debranching enzyme OS=Vibrio parahaemolyticus serotype O3:K6 (strain AQ3810) GN=A79_5198 PE=4 SV=1	0.531	0.828	1.55932	0.640919	up	-	K09896	COG3084
A6BAB8	tRNA (Guanine-N(7)-)-methyltransferase (Fragment) OS=Vibrio parahaemolyticus serotype O3:K6 (strain AQ3810) GN=trmB PE=3 SV=1	0.728	1.1	1.51099	0.595493	up	GO:0006400;GO:0008168;GO:0008176;GO:0016740;GO:0032259;GO:0036265	K03439	COG0220
A6B0M5	CbbY family protein OS=Vibrio parahaemolyticus serotype O3:K6 (strain AQ3810) GN=A79_3738 PE=4 SV=1	1.264	0.836	0.661392	-0.596422	down	GO:0008152;GO:0016787	-	COG0637
A6B9I0	Stringent starvation protein B OS=Vibrio parahaemolyticus serotype O3:K6 (strain AQ3810) GN=sspB PE=4 SV=1	0.585	0.94	1.60684	0.684224	up	-	K03600	COG2969
A6AWX0	Soluble cytochrome b562 OS=Vibrio parahaemolyticus serotype O3:K6 (strain AQ3810) GN=A79_0409 PE=4 SV=1	0.341	0.879	2.57771	1.36609	up	GO:0005506;GO:0009055;GO:0020037;GO:0022900;GO:0042597	K15536	COG3783
A6B3L8	Uncharacterized protein OS=Vibrio parahaemolyticus serotype O3:K6 (strain AQ3810) GN=A79_0658 PE=4 SV=1	0.49	0.786	1.60408	0.681748	up	-	-	-
A6B2W4	YcgL domain-containing protein A79_2353 OS=Vibrio parahaemolyticus serotype O3:K6 (strain AQ3810) GN=A79_2353 PE=3 SV=1	0.527	0.997	1.89184	0.919791	up	-	K09902	COG3100
A6B319	YecA family protein OS=Vibrio parahaemolyticus serotype O3:K6 (strain AQ3810) GN=A79_2441 PE=3 SV=1	0.574	1	1.74216	0.800877	up	-	K07039	COG3318
A6BAH2	Thiol:disulfide interchange protein OS=Vibrio parahaemolyticus serotype O3:K6 (strain AQ3810) GN=A79_5195 PE=3 SV=1	0.45	0.956	2.12444	1.08709	up	GO:0015035;GO:0042597;GO:0045454;GO:0055114	K03673	COG0526
A6AZP2	Nucleoside diphosphate kinase regulator OS=Vibrio parahaemolyticus serotype O3:K6 (strain AQ3810) GN=A79_3116 PE=4 SV=1	0.742	1.151	1.55121	0.633397	up	GO:0003677;GO:0016301;GO:0016310;GO:0032784	K06140	COG0782
A6B435	Peptide ABC transporter, periplasmic peptide-binding protein OS=Vibrio parahaemolyticus serotype O3:K6 (strain AQ3810) GN=A79_5359 PE=4 SV=1	0.755	1.265	1.6755	0.744589	up	GO:0043190;GO:0055085	K02035	COG0747
A6AZD2	Uncharacterized protein OS=Vibrio parahaemolyticus serotype O3:K6 (strain AQ3810) GN=A79_4241 PE=4 SV=1	0.624	1.066	1.70833	0.77259	up	GO:0016020;GO:0016021	-	COG2979
A6B044	Arsenate reductase OS=Vibrio parahaemolyticus serotype O3:K6 (strain AQ3810) GN=arsC PE=3 SV=1	0.338	0.868	2.56805	1.36067	up	GO:0008794;GO:0016491;GO:0055114	K00537	COG1393
A6BAX4	Inner membrane lipoprotein YiaD (Fragment) OS=Vibrio parahaemolyticus serotype O3:K6 (strain AQ3810) GN=A79_5625 PE=3 SV=1	0.633	1.099	1.73618	0.795914	up	GO:0009279;GO:0016020;GO:0016021	-	COG2885
A6B8M4	Uncharacterized protein OS=Vibrio parahaemolyticus serotype O3:K6 (strain AQ3810) GN=A79_5080 PE=4 SV=1	0.6	1.005	1.675	0.744161	up	-	-	-
A6B8G3	Msha biogenesis protein mshn OS=Vibrio parahaemolyticus serotype O3:K6 (strain AQ3810) GN=A79_4667 PE=4 SV=1	0.644	1.007	1.56366	0.644931	up	-	K12284	-
A6AZW6	YfcL protein OS=Vibrio parahaemolyticus serotype O3:K6 (strain AQ3810) GN=A79_2607 PE=4 SV=1	0.418	1.02	2.44019	1.28699	up	-	-	-
A6B9M0	Agglutination protein OS=Vibrio parahaemolyticus serotype O3:K6 (strain AQ3810) GN=A79_4146 PE=4 SV=1	0.586	1.121	1.91297	0.935814	up	-	-	COG4340
A6AZU9	Molybdate ABC transporter, periplasmic molybdate-binding protein OS=Vibrio parahaemolyticus serotype O3:K6 (strain AQ3810) GN=modA PE=4 SV=1	0.365	0.891	2.4411	1.28753	up	GO:0015412;GO:0015689;GO:0030288	K02020	COG0725
A6B6J9	GatB/YqeY domain protein OS=Vibrio parahaemolyticus serotype O3:K6 (strain AQ3810) GN=A79_5489 PE=4 SV=1	0.429	0.933	2.17483	1.1209	up	GO:0016884	K09117	COG1610
A6B9X3	Saccharopine dehydrogenase (Fragment) OS=Vibrio parahaemolyticus serotype O3:K6 (strain AQ3810) GN=A79_1887 PE=4 SV=1	0.679	1.034	1.52283	0.606753	up	GO:0016491;GO:0055114	K13746	-
A6B414	Putative nitrogen regulatory protein P-II family protein OS=Vibrio parahaemolyticus serotype O3:K6 (strain AQ3810) GN=A79_2296 PE=4 SV=1	0.473	0.866	1.83087	0.872527	up	GO:0006808;GO:0030234;GO:0050790	-	-
A6B413	CBS domain protein OS=Vibrio parahaemolyticus serotype O3:K6 (strain AQ3810) GN=A79_2295 PE=4 SV=1	1.351	0.873	0.646188	-0.629974	down	-	-	COG0517
A6B0K9	Polyhydroxyalkanoic acid synthase OS=Vibrio parahaemolyticus serotype O3:K6 (strain AQ3810) GN=A79_3722 PE=4 SV=1	0.813	1.351	1.66175	0.7327	up	GO:0005737;GO:0016746;GO:0042619	K03821	COG3243
A6B9U1	50S ribosomal protein L31 OS=Vibrio parahaemolyticus serotype O3:K6 (strain AQ3810) GN=rpmE PE=3 SV=1	0.351	0.923	2.62963	1.39486	up	GO:0003723;GO:0003735;GO:0005622;GO:0005840;GO:0006412;GO:0019843;GO:0030529;GO:0046872	K02909	COG0254
A6B7S7	50S ribosomal protein L32 OS=Vibrio parahaemolyticus serotype O3:K6 (strain AQ3810) GN=rpmF PE=3 SV=1	0.273	0.731	2.67766	1.42097	up	GO:0003735;GO:0005840;GO:0006412;GO:0015934;GO:0030529	K02911	COG0333
A6B828	tRNA 2-thiocytidine biosynthesis protein TtcA OS=Vibrio parahaemolyticus serotype O3:K6 (strain AQ3810) GN=ttcA PE=3 SV=1	0.497	1.207	2.42857	1.28011	up	GO:0000166;GO:0005524;GO:0005737;GO:0008033	K14058	COG0037
A6B4J2	Conserved domain protein OS=Vibrio parahaemolyticus serotype O3:K6 (strain AQ3810) GN=A79_5155 PE=4 SV=1	0.612	1.04	1.69935	0.76498	up	GO:0016226	-	COG2975
A6B9X4	L-2,4-diaminobutyrate decarboxylase OS=Vibrio parahaemolyticus serotype O3:K6 (strain AQ3810) GN=A79_1888 PE=3 SV=1	0.689	1.051	1.5254	0.609187	up	GO:0003824;GO:0016829;GO:0016831;GO:0019752;GO:0030170	K00836	COG0076
A6B924	Outer-membrane lipoprotein carrier protein OS=Vibrio parahaemolyticus serotype O3:K6 (strain AQ3810) GN=lolA PE=3 SV=1	0.496	0.917	1.84879	0.886582	up	GO:0006810;GO:0008565;GO:0015031;GO:0042597;GO:0042953;GO:0042954	K03634	COG2834
A6AYA2	Glycine cleavage system H protein OS=Vibrio parahaemolyticus serotype O3:K6 (strain AQ3810) GN=gcvH PE=3 SV=1	0.507	1.047	2.06509	1.0462	up	GO:0005960;GO:0019464	K02437	COG0509
A6B500	30S ribosomal protein S16 OS=Vibrio parahaemolyticus serotype O3:K6 (strain AQ3810) GN=rpsP PE=3 SV=1	0.506	0.876	1.73123	0.791793	up	GO:0003735;GO:0005622;GO:0005840;GO:0006412;GO:0030529	K02959	COG0228
A6AYR6	Uncharacterized protein OS=Vibrio parahaemolyticus serotype O3:K6 (strain AQ3810) GN=A79_6145 PE=4 SV=1	0.643	1.04	1.61742	0.693693	up	-	-	-
A6B604	NADH dehydrogenase subunit ii-related protein OS=Vibrio parahaemolyticus serotype O3:K6 (strain AQ3810) GN=A79_3909 PE=4 SV=1	1.499	0.75	0.500334	-0.999038	down	-	-	-
A6B389	Translation initation factor SUI1, putative OS=Vibrio parahaemolyticus serotype O3:K6 (strain AQ3810) GN=A79_0238 PE=4 SV=1	0.407	0.908	2.23096	1.15766	up	GO:0003743;GO:0006413	K03113	COG0023
A6B2Q3	Uncharacterized protein OS=Vibrio parahaemolyticus serotype O3:K6 (strain AQ3810) GN=A79_0837 PE=4 SV=1	0.289	0.79	2.73356	1.45078	up	-	K07109	COG3054
A6B3Z5	ABC transporter substrate-binding protein OS=Vibrio parahaemolyticus serotype O3:K6 (strain AQ3810) GN=A79_2048 PE=4 SV=1	0.931	1.773	1.9044	0.929339	up	-	K02055	COG1840
A6BAY8	50S ribosomal protein L28 OS=Vibrio parahaemolyticus serotype O3:K6 (strain AQ3810) GN=rpmB PE=3 SV=1	0.301	1.055	3.50498	1.80941	up	GO:0003735;GO:0005622;GO:0005840;GO:0006412;GO:0030529	K02902	COG0227
A6B774	Chaperone protein skp OS=Vibrio parahaemolyticus serotype O3:K6 (strain AQ3810) GN=A79_3945 PE=3 SV=1	0.427	0.944	2.21077	1.14455	up	GO:0042597;GO:0051082	K06142	COG2825
A6AYP8	Uncharacterized protein OS=Vibrio parahaemolyticus serotype O3:K6 (strain AQ3810) GN=A79_6127 PE=4 SV=1	1.644	0.927	0.563869	-0.826569	down	GO:0016021	-	-
A6B9W3	Cell division topological specificity factor OS=Vibrio parahaemolyticus serotype O3:K6 (strain AQ3810) GN=minE PE=3 SV=1	0.531	0.896	1.68738	0.754787	up	GO:0007049;GO:0032955;GO:0051301	K03608	COG0851
A6B0X2	Uncharacterized protein OS=Vibrio parahaemolyticus serotype O3:K6 (strain AQ3810) GN=A79_5435 PE=4 SV=1	0.359	0.787	2.1922	1.13238	up	-	K09796	COG2847
A6B4F1	Chromosome partition protein MukE OS=Vibrio parahaemolyticus serotype O3:K6 (strain AQ3810) GN=mukE PE=3 SV=1	0.477	0.761	1.59539	0.673907	up	GO:0005737;GO:0006260;GO:0007049;GO:0007059;GO:0009295;GO:0030261;GO:0051301	K03804	COG3095
A6B4A5	Tena/thi-4 family OS=Vibrio parahaemolyticus serotype O3:K6 (strain AQ3810) GN=A79_0104 PE=4 SV=1	0.625	1.05	1.68	0.748461	up	GO:0006772;GO:0050334	K03707	COG0819
A6B0R8	ImpB OS=Vibrio parahaemolyticus serotype O3:K6 (strain AQ3810) GN=A79_3494 PE=4 SV=1	0.464	0.787	1.69612	0.762239	up	-	K11901	COG3516
A6B291	Uncharacterized protein OS=Vibrio parahaemolyticus serotype O3:K6 (strain AQ3810) GN=A79_5103 PE=4 SV=1	0.45	1.168	2.59556	1.37604	up	-	-	-
A6B199	Uncharacterized protein OS=Vibrio parahaemolyticus serotype O3:K6 (strain AQ3810) GN=A79_1882 PE=4 SV=1	0.578	0.894	1.54671	0.629205	up	-	-	-
A6B372	Uncharacterized protein OS=Vibrio parahaemolyticus serotype O3:K6 (strain AQ3810) GN=A79_0799 PE=4 SV=1	0.523	0.875	1.67304	0.742472	up	-	-	-
A6B2R4	Thiamin/thiamin pyrophosphate ABC transporter, thiamin/thiamin pyrophospate-binding protein OS=Vibrio parahaemolyticus serotype O3:K6 (strain AQ3810) GN=thiB PE=4 SV=1	0.516	0.929	1.80039	0.848308	up	GO:0005215;GO:0005524;GO:0006810;GO:0015888;GO:0030288;GO:0030975;GO:0048502;GO:0055085	K02064	COG4143
A6B1R9	Arginine-binding periplasmic protein 1 OS=Vibrio parahaemolyticus serotype O3:K6 (strain AQ3810) GN=A79_5293 PE=3 SV=1	0.699	1.074	1.53648	0.61963	up	GO:0004970;GO:0005215;GO:0006810;GO:0016020;GO:0030288;GO:0035235	K09997	COG0834
A6BCF1	Phosphate acyltransferase (Fragment) OS=Vibrio parahaemolyticus serotype O3:K6 (strain AQ3810) GN=plsX PE=3 SV=1	1.61	1.034	0.642236	-0.638825	down	GO:0003824;GO:0004872;GO:0005737;GO:0006629;GO:0006633;GO:0006644;GO:0006810;GO:0008654;GO:0016020;GO:0016616;GO:0016740;GO:0016747;GO:0055114	K03621	COG0416
A6B2W3	Membrane-bound lytic murein transglycosylase B OS=Vibrio parahaemolyticus serotype O3:K6 (strain AQ3810) GN=A79_2352 PE=4 SV=1	0.621	1.024	1.64895	0.721551	up	-	K08305	COG2951
A6B277	Sigma factor-binding protein Crl OS=Vibrio parahaemolyticus serotype O3:K6 (strain AQ3810) GN=crl PE=3 SV=1	0.62	1.044	1.68387	0.751782	up	GO:0005737;GO:0006351;GO:0006355;GO:0045893	K11926	-
A6AX63	Potassium uptake protein, TrkH family OS=Vibrio parahaemolyticus serotype O3:K6 (strain AQ3810) GN=A79_0503 PE=4 SV=1	1.73	0.8	0.462428	-1.1127	down	GO:0006812;GO:0008324;GO:0016020;GO:0016021;GO:0022820;GO:0055085;GO:0071805	K03498	COG0168
A6B168	Cold-shock' DNA-binding domain, putative OS=Vibrio parahaemolyticus serotype O3:K6 (strain AQ3810) GN=A79_1852 PE=4 SV=1	0.338	0.941	2.78402	1.47717	up	GO:0003676;GO:0003677;GO:0005737;GO:0006351;GO:0006355	K03704	COG1278
A6B622	UPF0319 protein A79_5747 OS=Vibrio parahaemolyticus serotype O3:K6 (strain AQ3810) GN=A79_5747 PE=3 SV=1	0.703	1.098	1.56188	0.643281	up	-	K09909	COG3110
A6B712	Cytochrome c oxidase, Cbb3-type, subunit I OS=Vibrio parahaemolyticus serotype O3:K6 (strain AQ3810) GN=ccoN PE=3 SV=1	1.609	1.057	0.65693	-0.606189	down	GO:0004129;GO:0005506;GO:0009055;GO:0009060;GO:0016020;GO:0016021;GO:0016491;GO:0020037;GO:0045278;GO:0046872;GO:0055114;GO:0070469;GO:1902600	K00404	COG3278
A6B100	UPF0319 protein A79_6064 OS=Vibrio parahaemolyticus serotype O3:K6 (strain AQ3810) GN=A79_6064 PE=3 SV=1	0.602	0.967	1.60631	0.683752	up	-	K09909	-
A6B2A5	Cytoplasmic chaperone TorD family protein OS=Vibrio parahaemolyticus serotype O3:K6 (strain AQ3810) GN=A79_5117 PE=4 SV=1	0.622	1.139	1.83119	0.872781	up	-	-	COG3381
A6B7S1	Basal-body rod modification protein FlgD OS=Vibrio parahaemolyticus serotype O3:K6 (strain AQ3810) GN=A79_3960 PE=3 SV=1	0.58	1.018	1.75517	0.811613	up	GO:0044781	K02389	COG1843
A6B2U5	Acyl carrier protein OS=Vibrio parahaemolyticus serotype O3:K6 (strain AQ3810) GN=acpP PE=3 SV=1	0.684	1.028	1.50292	0.587772	up	GO:0000036;GO:0005737;GO:0006629;GO:0006631;GO:0006633	K02078	COG0236
A6B0C1	10 kDa chaperonin OS=Vibrio parahaemolyticus serotype O3:K6 (strain AQ3810) GN=groS PE=3 SV=1	0.73	1.163	1.59315	0.671883	up	GO:0005524;GO:0005737;GO:0006457	K04078	COG0234
A6B5B3	Der GTPase-activating protein YihI OS=Vibrio parahaemolyticus serotype O3:K6 (strain AQ3810) GN=yihI PE=3 SV=1	0.666	1.016	1.52553	0.609306	up	GO:0005096;GO:0042254;GO:0043547	K09894	COG3078
A6B6E8	2-C-methyl-D-erythritol 2,4-cyclodiphosphate synthase OS=Vibrio parahaemolyticus serotype O3:K6 (strain AQ3810) GN=ispF PE=3 SV=1	0.725	1.34	1.84828	0.88618	up	GO:0008299;GO:0008685;GO:0016114;GO:0016829;GO:0019288;GO:0046872	K01770	COG0245
A6BB54	Uncharacterized protein OS=Vibrio parahaemolyticus serotype O3:K6 (strain AQ3810) GN=A79_4925 PE=4 SV=1	0.606	0.987	1.62871	0.703732	up	-	-	-
A6B9M7	50S ribosomal protein L23 OS=Vibrio parahaemolyticus serotype O3:K6 (strain AQ3810) GN=rplW PE=3 SV=1	0.472	0.797	1.68856	0.755793	up	GO:0000166;GO:0003723;GO:0003735;GO:0005622;GO:0005840;GO:0006412;GO:0019843;GO:0030529	K02892	COG0089
A6B9A8	Non-canonical purine NTP phosphatase OS=Vibrio parahaemolyticus serotype O3:K6 (strain AQ3810) GN=A79_0812 PE=3 SV=1	0.558	1.107	1.98387	0.988318	up	GO:0000166;GO:0009117;GO:0016787;GO:0017111;GO:0046872	-	COG1986
A6B8Y6	50S ribosomal protein L25 OS=Vibrio parahaemolyticus serotype O3:K6 (strain AQ3810) GN=rplY PE=3 SV=1	0.408	0.972	2.38235	1.25239	up	GO:0003723;GO:0003735;GO:0005840;GO:0006412;GO:0008097;GO:0019843;GO:0030529	K02897	COG1825
A6B0K6	Acetoacetyl-CoA reductase OS=Vibrio parahaemolyticus serotype O3:K6 (strain AQ3810) GN=A79_3719 PE=4 SV=1	0.803	1.209	1.5056	0.590342	up	GO:0005737;GO:0016491;GO:0018454;GO:0042619;GO:0055114	K00023	COG1028
A6B4M7	High-affinity zinc uptake system protein ZnuA OS=Vibrio parahaemolyticus serotype O3:K6 (strain AQ3810) GN=A79_4157 PE=3 SV=1	0.63	0.969	1.5381	0.621145	up	GO:0006810;GO:0007155;GO:0030001;GO:0046872	K09815	COG4531
A6BAI3	Endoribonuclease YbeY OS=Vibrio parahaemolyticus serotype O3:K6 (strain AQ3810) GN=ybeY PE=3 SV=1	0.665	1.067	1.60451	0.682134	up	GO:0004222;GO:0004518;GO:0004519;GO:0004521;GO:0005737;GO:0006364;GO:0006508;GO:0008270;GO:0016787;GO:0042254;GO:0046872;GO:0090305;GO:0090502	K07042	COG0319
A6B4X9	Lactoylglutathione lyase OS=Vibrio parahaemolyticus serotype O3:K6 (strain AQ3810) GN=A79_3065 PE=4 SV=1	0.725	1.335	1.84138	0.880787	up	GO:0016829	K01759	COG0346
A6B613	Polar flagellar FlgM OS=Vibrio parahaemolyticus serotype O3:K6 (strain AQ3810) GN=A79_3325 PE=4 SV=1	0.311	0.961	3.09003	1.62762	up	GO:0045892	K02398	COG2747
A6B626	CopG protein OS=Vibrio parahaemolyticus serotype O3:K6 (strain AQ3810) GN=A79_5751 PE=4 SV=1	0.5	0.919	1.838	0.878137	up	-	-	COG3019
A6B4Y1	Alkaline phosphatase OS=Vibrio parahaemolyticus serotype O3:K6 (strain AQ3810) GN=A79_3067 PE=3 SV=1	1.024	1.912	1.86719	0.900867	up	GO:0003824;GO:0008152;GO:0016311;GO:0016791	K01077	COG1785
A6B2J2	Copper/silver resistance periplasmic protein OS=Vibrio parahaemolyticus serotype O3:K6 (strain AQ3810) GN=A79_1272 PE=3 SV=1	1.623	1.029	0.634011	-0.65742	down	GO:0016020;GO:0055085	K07798	COG0845
A6AYQ5	Dimethylsulfoxide reductase, chain B OS=Vibrio parahaemolyticus serotype O3:K6 (strain AQ3810) GN=dmsB PE=4 SV=1	0.619	1.132	1.82876	0.870863	up	-	K07307	COG0437
A6AZN8	Uncharacterized protein OS=Vibrio parahaemolyticus serotype O3:K6 (strain AQ3810) GN=A79_3110 PE=4 SV=1	1.383	0.742	0.536515	-0.89831	down	-	-	-
A6AYK5	Accessory colonization factor AcfA OS=Vibrio parahaemolyticus serotype O3:K6 (strain AQ3810) GN=A79_1602 PE=4 SV=1	1.609	0.881	0.547545	-0.86895	down	GO:0016021	K10936	-
A6B7Z2	Type I secretion target ggxgxdxxx repeat (2 copies) domain protein OS=Vibrio parahaemolyticus serotype O3:K6 (strain AQ3810) GN=A79_3825 PE=4 SV=1	0.769	1.732	2.25228	1.17138	up	GO:0005509	-	COG2931
A6B043	Putative beta-barrel assembly-enhancing protease OS=Vibrio parahaemolyticus serotype O3:K6 (strain AQ3810) GN=A79_2686 PE=3 SV=1	0.598	0.979	1.63712	0.711163	up	GO:0004222;GO:0006508;GO:0008233;GO:0008237;GO:0008270;GO:0016020;GO:0016787;GO:0042597;GO:0046872;GO:0061077	-	COG4783
A6AYD4	Uncharacterized protein OS=Vibrio parahaemolyticus serotype O3:K6 (strain AQ3810) GN=A79_1530 PE=4 SV=1	0.563	1.082	1.92185	0.942494	up	-	-	COG5642
A6B6M8	YrbB protein OS=Vibrio parahaemolyticus serotype O3:K6 (strain AQ3810) GN=A79_0014 PE=4 SV=1	1.798	1.005	0.558954	-0.839198	down	-	K07122	COG3113
A6AX35	Phosphate import ATP-binding protein PstB OS=Vibrio parahaemolyticus serotype O3:K6 (strain AQ3810) GN=pstB PE=3 SV=1	0.967	1.699	1.75698	0.813098	up	GO:0000166;GO:0005315;GO:0005524;GO:0005886;GO:0006810;GO:0006817;GO:0015415;GO:0016020;GO:0016787;GO:0016887;GO:0035435;GO:0043190	K02036	COG1117
A6AXK9	Antitoxin OS=Vibrio parahaemolyticus serotype O3:K6 (strain AQ3810) GN=A79_0865 PE=3 SV=1	0.632	0.968	1.53165	0.615082	up	-	-	COG2161
A6B7M9	C4-dicarboxylate transport sensor protein OS=Vibrio parahaemolyticus serotype O3:K6 (strain AQ3810) GN=A79_5225 PE=4 SV=1	0.756	1.354	1.79101	0.84077	up	GO:0016020;GO:0016021	K10125	-
A6B6G5	Metal-dependent phosphohydrolase, HD subdomain OS=Vibrio parahaemolyticus serotype O3:K6 (strain AQ3810) GN=A79_5666 PE=4 SV=1	0.606	1.137	1.87624	0.907843	up	GO:0016787	K07023	COG1896
A6B3X1	Uncharacterized protein OS=Vibrio parahaemolyticus serotype O3:K6 (strain AQ3810) GN=A79_2024 PE=4 SV=1	0.35	0.701	2.00286	1.00206	up	-	-	-
A6B8F6	3-hydroxydecanoyl-[acyl-carrier-protein] dehydratase (Fragment) OS=Vibrio parahaemolyticus serotype O3:K6 (strain AQ3810) GN=A79_3932 PE=4 SV=1	0.515	0.925	1.79612	0.844881	up	GO:0016829;GO:0019171;GO:0047451	K01716	COG0764
A6B2Y0	Fumarate reductase subunit C OS=Vibrio parahaemolyticus serotype O3:K6 (strain AQ3810) GN=frdC PE=3 SV=1	1.459	0.847	0.580535	-0.784546	down	GO:0005886;GO:0016020;GO:0016021	K00246	COG3029
A6B1V8	Appr-1-p processing OS=Vibrio parahaemolyticus serotype O3:K6 (strain AQ3810) GN=A79_5933 PE=4 SV=1	1.196	0.779	0.651338	-0.618522	down	-	-	COG2110
A6B851	Heat shock protein 15 OS=Vibrio parahaemolyticus serotype O3:K6 (strain AQ3810) GN=A79_0762 PE=3 SV=1	0.435	0.995	2.28736	1.19368	up	GO:0003677;GO:0003723;GO:0003727;GO:0034605;GO:0043023	K04762	COG1188
A6B1W2	Modulator of Rho-dependent transcription termination (ROF) OS=Vibrio parahaemolyticus serotype O3:K6 (strain AQ3810) GN=A79_5937 PE=4 SV=1	1.351	0.905	0.669874	-0.578038	down	-	-	COG4568
A6B3Y5	Cation/multidrug efflux pump OS=Vibrio parahaemolyticus serotype O3:K6 (strain AQ3810) GN=A79_2038 PE=3 SV=1	0.638	1.032	1.61755	0.693815	up	GO:0005215;GO:0006810;GO:0016020;GO:0016021	-	COG0841
A6AY27	Transcriptional regulator, LysR family OS=Vibrio parahaemolyticus serotype O3:K6 (strain AQ3810) GN=A79_1038 PE=4 SV=1	0.776	1.217	1.5683	0.649201	up	GO:0003677;GO:0003700;GO:0006351;GO:0006355	-	COG0583
A6B480	Glyoxalase family protein OS=Vibrio parahaemolyticus serotype O3:K6 (strain AQ3810) GN=A79_4984 PE=4 SV=1	1.915	0.942	0.491906	-1.02355	down	-	-	-
A6B4H4	Nonspecific acid phosphatase OS=Vibrio parahaemolyticus serotype O3:K6 (strain AQ3810) GN=A79_2989 PE=4 SV=1	0.583	0.942	1.61578	0.692231	up	-	-	-
A6AZY4	CytoChrome c-type biogenesis protein CcmH OS=Vibrio parahaemolyticus serotype O3:K6 (strain AQ3810) GN=A79_2625 PE=4 SV=1	0.618	1.022	1.65372	0.725716	up	GO:0016020;GO:0016021	K02200	COG3088
A6B1F7	Uncharacterized protein OS=Vibrio parahaemolyticus serotype O3:K6 (strain AQ3810) GN=A79_0161 PE=4 SV=1	0.749	1.138	1.51936	0.603463	up	-	-	-
A6B9F0	6-carboxy-5,6,7,8-tetrahydropterin synthase OS=Vibrio parahaemolyticus serotype O3:K6 (strain AQ3810) GN=A79_1904 PE=3 SV=1	0.568	1.107	1.94894	0.962692	up	GO:0008616;GO:0016829;GO:0046872	K01737	COG0720
A6B162	Efflux ABC transporter, permease protein OS=Vibrio parahaemolyticus serotype O3:K6 (strain AQ3810) GN=A79_1845 PE=3 SV=1	1.531	0.971	0.634226	-0.656931	down	GO:0005886;GO:0016020;GO:0016021	-	COG0577;COG4591
A6B307	Uncharacterized protein (Fragment) OS=Vibrio parahaemolyticus serotype O3:K6 (strain AQ3810) GN=A79_5049 PE=4 SV=1	0.557	0.936	1.68043	0.748831	up	GO:0016020;GO:0016021	-	COG4395
A6B8Q3	5-carboxymethyl-2-hydroxymuconate delta isomerase OS=Vibrio parahaemolyticus serotype O3:K6 (strain AQ3810) GN=hpcD PE=4 SV=1	0.495	0.781	1.57778	0.657894	up	GO:0008704;GO:0016853;GO:0019439	K01826	COG3232
A6AZU0	Anaerobic ribonucleoside-triphosphate reductase-activating protein OS=Vibrio parahaemolyticus serotype O3:K6 (strain AQ3810) GN=nrdG PE=3 SV=1	0.672	1.125	1.67411	0.743392	up	GO:0003824;GO:0005737;GO:0016491;GO:0043365;GO:0051539;GO:0055114	K04068	COG0602
A6B3U7	DNA polymerase III subunit psi OS=Vibrio parahaemolyticus serotype O3:K6 (strain AQ3810) GN=A79_2956 PE=4 SV=1	1.463	0.854	0.583732	-0.776622	down	GO:0003887;GO:0006260;GO:0008408;GO:0016740;GO:0016779;GO:0071897;GO:0090305	K02344	COG3050
A6AYN1	Periplasmic protein involved in polysaccharide export OS=Vibrio parahaemolyticus serotype O3:K6 (strain AQ3810) GN=A79_6111 PE=4 SV=1	1.408	0.868	0.616477	-0.69788	down	GO:0015159;GO:0015774;GO:0016020	-	COG1596
A6B8A1	Uncharacterized protein OS=Vibrio parahaemolyticus serotype O3:K6 (strain AQ3810) GN=A79_1788 PE=4 SV=1	0.491	0.963	1.9613	0.971813	up	GO:0016020;GO:0016021	-	-
A6BCJ6	Transcriptional regulator, LysR family (Fragment) OS=Vibrio parahaemolyticus serotype O3:K6 (strain AQ3810) GN=A79_0732 PE=4 SV=1	1.311	0.792	0.604119	-0.727095	down	-	-	-
A6AZB2	5'-methylthioadenosine/S-adenosylhomocysteine nucleosidase 2 OS=Vibrio parahaemolyticus serotype O3:K6 (strain AQ3810) GN=mtnN PE=3 SV=1	0.526	0.853	1.62167	0.697483	up	GO:0003824;GO:0008152;GO:0008652;GO:0008782;GO:0008930;GO:0009086;GO:0009116;GO:0009164;GO:0016787;GO:0016798;GO:0019509	K01243	COG0775
A6B1I7	ABC transporter substrate-binding protein OS=Vibrio parahaemolyticus serotype O3:K6 (strain AQ3810) GN=A79_0191 PE=4 SV=1	0.399	1.027	2.57393	1.36398	up	-	K05777	COG4134
A6AWY2	Superoxide dismutase [Cu-Zn] OS=Vibrio parahaemolyticus serotype O3:K6 (strain AQ3810) GN=sodC PE=3 SV=1	0.751	1.133	1.50866	0.593263	up	GO:0004784;GO:0006801;GO:0016491;GO:0019430;GO:0046872;GO:0055114	K04565	COG2032
A6B987	Gluconokinase OS=Vibrio parahaemolyticus serotype O3:K6 (strain AQ3810) GN=aroK PE=3 SV=1	0.595	1.836	3.08571	1.6256	up	GO:0000166;GO:0005524;GO:0005975;GO:0016301;GO:0016310;GO:0016740;GO:0046316	K00851	COG3265
A6B2Z8	Putative 2-succinyl-6-hydroxy-2,4-cyclohexadiene-1-carboxylate synthase OS=Vibrio parahaemolyticus serotype O3:K6 (strain AQ3810) GN=menH PE=3 SV=1	0.611	1.124	1.83961	0.879398	up	GO:0009234;GO:0016787;GO:0016829;GO:0070205	K08680	COG0596
A6B6H9	tRNA-(Ms[2]io[6]A)-hydroxylase OS=Vibrio parahaemolyticus serotype O3:K6 (strain AQ3810) GN=A79_6037 PE=4 SV=1	0.756	1.14	1.50794	0.592576	up	GO:0016491;GO:0055114	K06169	COG4445
A6B4B4	50S ribosomal protein L34 OS=Vibrio parahaemolyticus serotype O3:K6 (strain AQ3810) GN=rpmH PE=3 SV=1	0.339	0.867	2.55752	1.35475	up	GO:0003735;GO:0005622;GO:0005840;GO:0006412;GO:0030529	K02914	COG0230
A6AZE2	Conserved domain protein OS=Vibrio parahaemolyticus serotype O3:K6 (strain AQ3810) GN=A79_4251 PE=4 SV=1	0.447	0.996	2.22819	1.15587	up	-	K05952	COG2991
A6AXT5	Putative agmatine deiminase OS=Vibrio parahaemolyticus serotype O3:K6 (strain AQ3810) GN=aguA PE=3 SV=1	0.589	1.474	2.50255	1.3234	up	GO:0004668;GO:0009446;GO:0016787;GO:0047632	K10536	COG2957
A6B614	Polar flagellar FlgN OS=Vibrio parahaemolyticus serotype O3:K6 (strain AQ3810) GN=A79_5738 PE=4 SV=1	0.549	1.008	1.83607	0.876618	up	GO:0044780	K02399	COG3418
A6B1K7	Twin-arginine translocation pathway signal OS=Vibrio parahaemolyticus serotype O3:K6 (strain AQ3810) GN=A79_5987 PE=4 SV=1	0.791	3.564	4.50569	2.17175	up	-	K07093	COG3211
A6B5S3	Uncharacterized protein OS=Vibrio parahaemolyticus serotype O3:K6 (strain AQ3810) GN=A79_2200 PE=4 SV=1	0.959	1.561	1.62774	0.702868	up	-	-	-
A6B8T9	Sec-independent protein translocase protein TatB OS=Vibrio parahaemolyticus serotype O3:K6 (strain AQ3810) GN=tatB PE=3 SV=1	0.614	0.971	1.58143	0.661233	up	GO:0005886;GO:0005887;GO:0006810;GO:0008320;GO:0008565;GO:0009306;GO:0015031;GO:0016020;GO:0016021;GO:0033281;GO:0043953	K03117	COG1826
A6B2D2	Transcriptional regulator OS=Vibrio parahaemolyticus serotype O3:K6 (strain AQ3810) GN=A79_4757 PE=4 SV=1	0.417	0.635	1.52278	0.606709	up	GO:0003677;GO:0003700;GO:0006351;GO:0006355	-	COG0583
A6B7T6	ABC transporter, periplasmic substrate-binding protein OS=Vibrio parahaemolyticus serotype O3:K6 (strain AQ3810) GN=A79_1161 PE=4 SV=1	0.654	1.893	2.8945	1.53331	up	GO:0006810	K02040	COG0226
A6B4L1	Uncharacterized protein OS=Vibrio parahaemolyticus serotype O3:K6 (strain AQ3810) GN=A79_5068 PE=4 SV=1	0.427	1.108	2.59485	1.37565	up	-	-	-
A6B0W1	Copper sensitivity protein ScsC OS=Vibrio parahaemolyticus serotype O3:K6 (strain AQ3810) GN=A79_5424 PE=4 SV=1	0.29	0.842	2.90345	1.53777	up	-	-	COG1651
A6B8R9	Glutathione-regulated potassium-efflux system protein KefB OS=Vibrio parahaemolyticus serotype O3:K6 (strain AQ3810) GN=kefB PE=3 SV=1	0.41	0.901	2.19756	1.1359	up	GO:0005886;GO:0005887;GO:0006810;GO:0006811;GO:0006812;GO:0006813;GO:0008324;GO:0015079;GO:0015297;GO:0015299;GO:0015503;GO:0016020;GO:0016021;GO:0055085;GO:0071805;GO:0098655;GO:1902600	K11747	COG1226;COG0475
A6AX47	DNA-binding HTH domain-containing protein OS=Vibrio parahaemolyticus serotype O3:K6 (strain AQ3810) GN=A79_0487 PE=4 SV=1	0.637	1.112	1.74568	0.803792	up	GO:0003677;GO:0006351;GO:0006355	-	COG2771
A6B5M1	S-formylglutathione hydrolase OS=Vibrio parahaemolyticus serotype O3:K6 (strain AQ3810) GN=fghA PE=3 SV=1	0.795	1.693	2.12956	1.09056	up	GO:0016787;GO:0018738;GO:0046294;GO:0052689	K01070	COG0627
A6B1N4	OsmC/Ohr family protein OS=Vibrio parahaemolyticus serotype O3:K6 (strain AQ3810) GN=A79_6015 PE=4 SV=1	0.471	1.06	2.25053	1.17027	up	-	K07397	COG1765
A6B6X8	50S ribosomal protein L35 OS=Vibrio parahaemolyticus serotype O3:K6 (strain AQ3810) GN=rpmI PE=3 SV=1	0.636	1.006	1.58176	0.661532	up	GO:0003735;GO:0005622;GO:0005840;GO:0006412;GO:0030529	K02916	COG0291
A6BC66	Cytochrome c family protein (Fragment) OS=Vibrio parahaemolyticus serotype O3:K6 (strain AQ3810) GN=A79_0154 PE=4 SV=1	0.603	0.984	1.63184	0.7065	up	GO:0009055;GO:0020037	-	COG3258
A6AXT0	Glutamine amidotransferase OS=Vibrio parahaemolyticus serotype O3:K6 (strain AQ3810) GN=A79_0940 PE=4 SV=1	0.6	1.598	2.66333	1.41323	up	GO:0006541;GO:0016740;GO:0016787	K07010	COG2071
A6AYE5	Acetyltransferase, gnat family OS=Vibrio parahaemolyticus serotype O3:K6 (strain AQ3810) GN=A79_0313 PE=4 SV=1	0.509	0.93	1.82711	0.869565	up	GO:0008080;GO:0016740	-	COG0454
A6B2D5	MetE OS=Vibrio parahaemolyticus serotype O3:K6 (strain AQ3810) GN=A79_4760 PE=4 SV=1	0.578	1.207	2.08824	1.06228	up	GO:0003871;GO:0008270;GO:0009086;GO:0032259	K00549	COG0620
A6B4E2	ATP synthase C chain OS=Vibrio parahaemolyticus serotype O3:K6 (strain AQ3810) GN=A79_3297 PE=3 SV=1	2.024	0.958	0.47332	-1.07911	down	GO:0006810;GO:0006811;GO:0015078;GO:0015986;GO:0015991;GO:0015992;GO:0016020;GO:0016021;GO:0016787;GO:0033177;GO:0045263	K02110	COG0636
A6B3X8	Redox-sensitive transcriptional activator SoxR OS=Vibrio parahaemolyticus serotype O3:K6 (strain AQ3810) GN=soxR PE=4 SV=1	0.575	0.89	1.54783	0.630243	up	GO:0003677;GO:0006355;GO:0006979;GO:0051537	K13639	COG0789
A6B8A0	UPF0345 protein A79_1787 OS=Vibrio parahaemolyticus serotype O3:K6 (strain AQ3810) GN=A79_1787 PE=3 SV=1	0.436	1.152	2.6422	1.40174	up	-	K09913	COG3123
A6AY60	Histone acetyltransferase HPA2 OS=Vibrio parahaemolyticus serotype O3:K6 (strain AQ3810) GN=A79_1071 PE=4 SV=1	0.598	1.028	1.71906	0.781623	up	GO:0008080;GO:0016740	-	COG0454
A6B5A3	Uncharacterized protein OS=Vibrio parahaemolyticus serotype O3:K6 (strain AQ3810) GN=A79_3250 PE=4 SV=1	1.517	0.505	0.332894	-1.58687	down	-	-	-
A6B1V7	Lactoylglutathione lyase OS=Vibrio parahaemolyticus serotype O3:K6 (strain AQ3810) GN=A79_5932 PE=4 SV=1	0.455	0.846	1.85934	0.894791	up	GO:0016829	-	COG0346
A6B108	Uncharacterized protein OS=Vibrio parahaemolyticus serotype O3:K6 (strain AQ3810) GN=A79_6072 PE=4 SV=1	0.676	1.106	1.63609	0.710256	up	-	-	-
A6AWU3	Flagellar basal body-associated protein FliL OS=Vibrio parahaemolyticus serotype O3:K6 (strain AQ3810) GN=fliL PE=4 SV=1	0.778	1.171	1.50514	0.589899	up	GO:0006935;GO:0009425;GO:0016020;GO:0016021;GO:0071973	K02415	-
A6B0L2	Periplasmic nitrate reductase, electron transfer subunit OS=Vibrio parahaemolyticus serotype O3:K6 (strain AQ3810) GN=napB PE=3 SV=1	0.679	1.499	2.20766	1.14252	up	GO:0042597;GO:0046872;GO:0055114	K02568	COG3043
A6AX90	Undecaprenyl-phosphate glucose phosphotransferase OS=Vibrio parahaemolyticus serotype O3:K6 (strain AQ3810) GN=A79_0530 PE=4 SV=1	0.662	1.286	1.9426	0.957988	up	GO:0016020;GO:0016021;GO:0016740	K03606	COG2148
A6B0Y5	Glycosidase OS=Vibrio parahaemolyticus serotype O3:K6 (strain AQ3810) GN=A79_5448 PE=4 SV=1	0.579	0.918	1.58549	0.664931	up	GO:0003824;GO:0005975;GO:0008152;GO:0016798	-	COG0366
A6B394	Putative phage structural protein OS=Vibrio parahaemolyticus serotype O3:K6 (strain AQ3810) GN=A79_0243 PE=4 SV=1	0.358	0.597	1.6676	0.737771	up	-	-	-
A6B762	Putative Lex2B OS=Vibrio parahaemolyticus serotype O3:K6 (strain AQ3810) GN=A79_5892 PE=4 SV=1	0.457	1.178	2.57768	1.36607	up	-	K07270	COG3306
A6B843	Uncharacterized protein OS=Vibrio parahaemolyticus serotype O3:K6 (strain AQ3810) GN=A79_4715 PE=4 SV=1	1.866	0.469	0.25134	-1.99229	down	GO:0016020;GO:0016021	-	-
A6AXV0	Uncharacterized protein OS=Vibrio parahaemolyticus serotype O3:K6 (strain AQ3810) GN=A79_0961 PE=4 SV=1	1.469	0.767	0.522124	-0.937536	down	-	-	-
A6B3L4	Pirin domain protein OS=Vibrio parahaemolyticus serotype O3:K6 (strain AQ3810) GN=A79_0654 PE=3 SV=1	0.297	0.929	3.12795	1.64522	up	-	K06911	COG1741
A6B561	Carbon starvation protein OS=Vibrio parahaemolyticus serotype O3:K6 (strain AQ3810) GN=A79_2104 PE=4 SV=1	0.889	1.53	1.72103	0.783276	up	GO:0009267;GO:0016020;GO:0016021	-	COG1966
A6B4Q0	Outer membrane protein OS=Vibrio parahaemolyticus serotype O3:K6 (strain AQ3810) GN=A79_1921 PE=4 SV=1	0.462	0.928	2.00866	1.00623	up	GO:0004872;GO:0006810;GO:0016020	-	-
A6AZ44	Acetoacetyl-CoA synthase OS=Vibrio parahaemolyticus serotype O3:K6 (strain AQ3810) GN=A79_4456 PE=4 SV=1	0.706	1.398	1.98017	0.985624	up	GO:0003824;GO:0006629;GO:0008152;GO:0016874;GO:0030729	K01907	COG0365
A6B3J2	YcjI gene product OS=Vibrio parahaemolyticus serotype O3:K6 (strain AQ3810) GN=ycjI PE=4 SV=1	0.551	1.003	1.82033	0.864197	up	GO:0004181;GO:0006508;GO:0008270	K14054	COG2866
A6AYL9	Tetratricopeptide repeat family protein OS=Vibrio parahaemolyticus serotype O3:K6 (strain AQ3810) GN=A79_1615 PE=4 SV=1	1.855	1.005	0.541779	-0.884224	down	GO:0046872;GO:0055114	-	-
A6AXH2	Putative TraA protein OS=Vibrio parahaemolyticus serotype O3:K6 (strain AQ3810) GN=A79_0610 PE=4 SV=1	0.38	0.746	1.96316	0.973176	up	-	-	-
A6B083	Transcriptional regulator OS=Vibrio parahaemolyticus serotype O3:K6 (strain AQ3810) GN=A79_2823 PE=4 SV=1	0.493	0.902	1.82961	0.87154	up	GO:0003677;GO:0003700;GO:0006351;GO:0006355	-	COG0583
A6B4C7	Uncharacterized protein OS=Vibrio parahaemolyticus serotype O3:K6 (strain AQ3810) GN=A79_3282 PE=4 SV=1	2.483	4.118	1.65848	0.72986	up	-	-	-
A6AXI3	Transcriptional regulator, AraC/XylS family, putative OS=Vibrio parahaemolyticus serotype O3:K6 (strain AQ3810) GN=A79_0621 PE=4 SV=1	1.004	1.801	1.79382	0.843039	up	GO:0003677;GO:0003700;GO:0006351;GO:0006355;GO:0043565	-	COG2207

## Sheet: Supplementary table 3B
Accession	Description	C	R	FC(R/Z)	log2FC(R/C)	regulate	GO	KO	COG
A6B0W6	Alpha-1,4 glucan phosphorylase OS=Vibrio parahaemolyticus serotype O3:K6 (strain AQ3810) GN=A79_5429 PE=3 SV=1	1	1.555	1.555	0.636915	up	GO:0004645;GO:0005975;GO:0008184;GO:0016740;GO:0016757;GO:0030170	K00688	COG0058
A6AZ88	NAD/NADP-dependent betaine aldehyde dehydrogenase OS=Vibrio parahaemolyticus serotype O3:K6 (strain AQ3810) GN=betB PE=3 SV=1	1	0.429	0.429	-1.22095	down	GO:0008152;GO:0008802;GO:0016491;GO:0016620;GO:0019285;GO:0046872;GO:0055114	K00130	COG1012
A6B101	Putative outer membrane porin protein locus of qsr prophage OS=Vibrio parahaemolyticus serotype O3:K6 (strain AQ3810) GN=A79_6065 PE=4 SV=1	1	0.221	0.221	-2.17788	down	-	-	-
A6B623	Outer membrane protein OS=Vibrio parahaemolyticus serotype O3:K6 (strain AQ3810) GN=A79_5748 PE=4 SV=1	1	1.84	1.84	0.879706	up	GO:0006810;GO:0015288;GO:0016020;GO:0055085	-	COG3203
A6AZ90	ABC-type proline/glycine betaine transport system, periplasmic component OS=Vibrio parahaemolyticus serotype O3:K6 (strain AQ3810) GN=A79_4502 PE=4 SV=1	1	0.403	0.403	-1.31115	down	GO:0005215;GO:0006810;GO:0015871;GO:0033265;GO:0042597	K02002	COG2113
A6B195	Outer membrane protein OS=Vibrio parahaemolyticus serotype O3:K6 (strain AQ3810) GN=A79_1878 PE=4 SV=1	1	2.205	2.205	1.14078	up	-	-	COG3203
A6B9L7	Lysine decarboxylase, constitutive OS=Vibrio parahaemolyticus serotype O3:K6 (strain AQ3810) GN=A79_5805 PE=4 SV=1	1	0.523	0.523	-0.935117	down	GO:0003824;GO:0008923;GO:0016829;GO:0016831	K01582	COG1982
A6AZ89	Oxygen-dependent choline dehydrogenase OS=Vibrio parahaemolyticus serotype O3:K6 (strain AQ3810) GN=betA PE=3 SV=1	1	0.452	0.452	-1.14561	down	GO:0008812;GO:0016491;GO:0016614;GO:0019285;GO:0050660;GO:0055114	K00108	COG2303
A6AXX7	ABC superfamily OS=Vibrio parahaemolyticus serotype O3:K6 (strain AQ3810) GN=A79_0988 PE=4 SV=1	1	0.522	0.522	-0.937878	down	GO:0005215;GO:0006810	K02002	COG2113
A6B5X0	Uncharacterized protein OS=Vibrio parahaemolyticus serotype O3:K6 (strain AQ3810) GN=A79_3581 PE=4 SV=1	1	0.607	0.607	-0.720232	down	-	-	-
A6AZ87	HTH-type transcriptional regulator BetI OS=Vibrio parahaemolyticus serotype O3:K6 (strain AQ3810) GN=betI PE=3 SV=1	1	0.532	0.532	-0.910502	down	GO:0003677;GO:0003700;GO:0006351;GO:0006355;GO:0019285;GO:0045892	K02167	COG1309
A6B0K7	Acetyl-CoA acetyltransferase OS=Vibrio parahaemolyticus serotype O3:K6 (strain AQ3810) GN=A79_3720 PE=3 SV=1	1	1.522	1.522	0.605968	up	GO:0003824;GO:0003985;GO:0008152;GO:0016740;GO:0016746;GO:0016747	K00626	COG0183
A6AXX9	Glycine betaine/L-proline transport ATP-binding protein ProV OS=Vibrio parahaemolyticus serotype O3:K6 (strain AQ3810) GN=A79_0990 PE=4 SV=1	1	0.51	0.51	-0.971431	down	GO:0000166;GO:0005524;GO:0016020;GO:0016887;GO:0031460	K02000	COG4175
A6BBH4	50S ribosomal protein L7/L12 OS=Vibrio parahaemolyticus serotype O3:K6 (strain AQ3810) GN=rplL PE=3 SV=1	1	0.641	0.641	-0.641604	down	GO:0003735;GO:0005622;GO:0005840;GO:0006412;GO:0030529	K02935	COG0222
A6B894	OpaR OS=Vibrio parahaemolyticus serotype O3:K6 (strain AQ3810) GN=A79_0351 PE=4 SV=1	1	0.632	0.632	-0.662004	down	GO:0003677;GO:0006351;GO:0006355	K10913	-
A6B9D2	Uncharacterized protein OS=Vibrio parahaemolyticus serotype O3:K6 (strain AQ3810) GN=A79_0030 PE=4 SV=1	1	0.617	0.617	-0.696658	down	-	-	-
A6AZ92	Glycine betaine transport ATP-binding protein opuAA OS=Vibrio parahaemolyticus serotype O3:K6 (strain AQ3810) GN=A79_4504 PE=4 SV=1	1	0.432	0.432	-1.2109	down	GO:0000166;GO:0005524;GO:0015220;GO:0015418;GO:0015871;GO:0016787;GO:0016887;GO:0055052;GO:0055085	K02000	COG4175
A6AZ80	Acyl-CoA dehydrogenase OS=Vibrio parahaemolyticus serotype O3:K6 (strain AQ3810) GN=A79_4492 PE=3 SV=1	1	0.662	0.662	-0.595097	down	GO:0003995;GO:0008152;GO:0016491;GO:0016627;GO:0050660;GO:0055114	K00257	COG1960
A6AYK7	Probable lipid kinase YegS-like OS=Vibrio parahaemolyticus serotype O3:K6 (strain AQ3810) GN=A79_1604 PE=3 SV=1	1	0.569	0.569	-0.813499	down	GO:0000166;GO:0000287;GO:0001727;GO:0003951;GO:0005524;GO:0005737;GO:0006629;GO:0008152;GO:0008654;GO:0016301;GO:0016310;GO:0016740;GO:0046834;GO:0046872	K07029	COG1597
A6AX32	Phosphate ABC transporter, periplasmic phosphate-binding protein OS=Vibrio parahaemolyticus serotype O3:K6 (strain AQ3810) GN=A79_0472 PE=4 SV=1	1	5.549	5.549	2.47223	up	GO:0006810	K02040	COG0226
A6B7L0	Acetyl-CoA carboxylase, biotin carboxyl carrier protein OS=Vibrio parahaemolyticus serotype O3:K6 (strain AQ3810) GN=accB PE=4 SV=1	1	0.386	0.386	-1.37333	down	GO:0003989;GO:0006633;GO:0009317	K02160	COG0511
A6B1T2	Uncharacterized protein OS=Vibrio parahaemolyticus serotype O3:K6 (strain AQ3810) GN=A79_5306 PE=4 SV=1	1	0.556	0.556	-0.846843	down	-	K09796	COG2847
A6B2S8	C4-dicarboxylate-binding periplasmic protein OS=Vibrio parahaemolyticus serotype O3:K6 (strain AQ3810) GN=A79_2316 PE=4 SV=1	1	1.556	1.556	0.637842	up	GO:0006810;GO:0030288	K11688	COG1638
A6B3X4	Uncharacterized protein OS=Vibrio parahaemolyticus serotype O3:K6 (strain AQ3810) GN=A79_2027 PE=4 SV=1	1	0.643	0.643	-0.637109	down	-	-	COG3367
A6B0V5	Proton/glutamate symporter OS=Vibrio parahaemolyticus serotype O3:K6 (strain AQ3810) GN=A79_5418 PE=4 SV=1	1	1.541	1.541	0.623867	up	GO:0015293;GO:0016020;GO:0016021;GO:0055085	-	COG1301
A6B8M3	Transport-associated OS=Vibrio parahaemolyticus serotype O3:K6 (strain AQ3810) GN=A79_5079 PE=4 SV=1	1	0.405	0.405	-1.30401	down	-	-	-
A6BCI2	P pilus assembly/Cpx signaling pathway, periplasmic inhibitor/zinc-resistance associated protein (Fragment) OS=Vibrio parahaemolyticus serotype O3:K6 (strain AQ3810) GN=A79_5620 PE=4 SV=1	1	1.904	1.904	0.929033	up	GO:0042597	K06006	COG3678
A6B1W4	Multidrug resistance efflux pump OS=Vibrio parahaemolyticus serotype O3:K6 (strain AQ3810) GN=A79_5939 PE=4 SV=1	1	0.667	0.667	-0.584241	down	GO:0016020;GO:0016021	K03543	COG1566
A6B3Z5	ABC transporter substrate-binding protein OS=Vibrio parahaemolyticus serotype O3:K6 (strain AQ3810) GN=A79_2048 PE=4 SV=1	1	1.773	1.773	0.826193	up	-	K02055	COG1840
A6AZ81	Enoyl-CoA hydratase OS=Vibrio parahaemolyticus serotype O3:K6 (strain AQ3810) GN=A79_4493 PE=3 SV=1	1	0.469	0.469	-1.09234	down	GO:0003824;GO:0008152	-	COG1024
A6BA64	Transcriptional regulator CpxR OS=Vibrio parahaemolyticus serotype O3:K6 (strain AQ3810) GN=A79_4656 PE=4 SV=1	1	0.606	0.606	-0.72261	down	GO:0000160;GO:0003677;GO:0005622;GO:0006351;GO:0006355	K07662	COG0745
A6AZ75	Isovaleryl-CoA dehydrogenase OS=Vibrio parahaemolyticus serotype O3:K6 (strain AQ3810) GN=A79_4487 PE=3 SV=1	1	0.638	0.638	-0.648372	down	GO:0003995;GO:0008152;GO:0016491;GO:0016627;GO:0050660;GO:0055114	K00253	COG1960
A6B4Y1	Alkaline phosphatase OS=Vibrio parahaemolyticus serotype O3:K6 (strain AQ3810) GN=A79_3067 PE=3 SV=1	1	1.912	1.912	0.935083	up	GO:0003824;GO:0008152;GO:0016311;GO:0016791	K01077	COG1785
A6AXY5	L-ectoine synthase OS=Vibrio parahaemolyticus serotype O3:K6 (strain AQ3810) GN=ectC PE=3 SV=1	1	0.486	0.486	-1.04097	down	GO:0016829;GO:0016836;GO:0019491;GO:0033990	K06720	-
A6B7Z2	Type I secretion target ggxgxdxxx repeat (2 copies) domain protein OS=Vibrio parahaemolyticus serotype O3:K6 (strain AQ3810) GN=A79_3825 PE=4 SV=1	1	1.732	1.732	0.792439	up	GO:0005509	-	COG2931
A6AX35	Phosphate import ATP-binding protein PstB OS=Vibrio parahaemolyticus serotype O3:K6 (strain AQ3810) GN=pstB PE=3 SV=1	1	1.699	1.699	0.764686	up	GO:0000166;GO:0005315;GO:0005524;GO:0005886;GO:0006810;GO:0006817;GO:0015415;GO:0016020;GO:0016787;GO:0016887;GO:0035435;GO:0043190	K02036	COG1117
A6B8C8	Transcriptional regulator, LuxR family OS=Vibrio parahaemolyticus serotype O3:K6 (strain AQ3810) GN=A79_6321 PE=4 SV=1	1	0.602	0.602	-0.732165	down	GO:0003677;GO:0006351;GO:0006355	-	COG2771
A6B4S4	Uncharacterized protein OS=Vibrio parahaemolyticus serotype O3:K6 (strain AQ3810) GN=A79_6278 PE=4 SV=1	1	0.604	0.604	-0.72738	down	-	-	-
A6AZ02	Uncharacterized protein OS=Vibrio parahaemolyticus serotype O3:K6 (strain AQ3810) GN=A79_6233 PE=4 SV=1	1	0.608	0.608	-0.717857	down	-	K09941	COG3310
A6BA47	Rod shape-determining protein RodA (Fragment) OS=Vibrio parahaemolyticus serotype O3:K6 (strain AQ3810) GN=mrdB PE=3 SV=1	1	0.625	0.625	-0.678072	down	GO:0008360;GO:0016020;GO:0016021;GO:0051301	K05837	COG0772
A6B0B7	Uncharacterized protein OS=Vibrio parahaemolyticus serotype O3:K6 (strain AQ3810) GN=A79_2857 PE=4 SV=1	1	0.645	0.645	-0.632629	down	GO:0008152;GO:0016846	-	COG3791
A6B987	Gluconokinase OS=Vibrio parahaemolyticus serotype O3:K6 (strain AQ3810) GN=aroK PE=3 SV=1	1	1.836	1.836	0.876566	up	GO:0000166;GO:0005524;GO:0005975;GO:0016301;GO:0016310;GO:0016740;GO:0046316	K00851	COG3265
A6B2J3	Cation efflux system protein CusA OS=Vibrio parahaemolyticus serotype O3:K6 (strain AQ3810) GN=A79_1273 PE=3 SV=1	1	0.607	0.607	-0.720232	down	GO:0005215;GO:0006810;GO:0006812;GO:0008324;GO:0016020;GO:0016021;GO:0098655	K07787	COG3696
A6B986	H+/gluconate symporter OS=Vibrio parahaemolyticus serotype O3:K6 (strain AQ3810) GN=A79_5603 PE=4 SV=1	1	1.803	1.803	0.850399	up	GO:0015128;GO:0016020;GO:0016021;GO:0035429	K03299	COG2610
A6B1K7	Twin-arginine translocation pathway signal OS=Vibrio parahaemolyticus serotype O3:K6 (strain AQ3810) GN=A79_5987 PE=4 SV=1	1	3.564	3.564	1.8335	up	-	K07093	COG3211
A6B5S3	Uncharacterized protein OS=Vibrio parahaemolyticus serotype O3:K6 (strain AQ3810) GN=A79_2200 PE=4 SV=1	1	1.561	1.561	0.642471	up	-	-	-
A6B2D2	Transcriptional regulator OS=Vibrio parahaemolyticus serotype O3:K6 (strain AQ3810) GN=A79_4757 PE=4 SV=1	1	0.635	0.635	-0.655172	down	GO:0003677;GO:0003700;GO:0006351;GO:0006355	-	COG0583
A6B7T6	ABC transporter, periplasmic substrate-binding protein OS=Vibrio parahaemolyticus serotype O3:K6 (strain AQ3810) GN=A79_1161 PE=4 SV=1	1	1.893	1.893	0.920674	up	GO:0006810	K02040	COG0226
A6B6H4	Transporter OS=Vibrio parahaemolyticus serotype O3:K6 (strain AQ3810) GN=A79_6032 PE=4 SV=1	1	1.64	1.64	0.713696	up	GO:0016020;GO:0016021;GO:0055085	K07088	COG0679
A6B3F0	tRNA-dihydrouridine(16) synthase OS=Vibrio parahaemolyticus serotype O3:K6 (strain AQ3810) GN=dusC PE=3 SV=1	1	0.62	0.62	-0.68966	down	GO:0000049;GO:0002943;GO:0003723;GO:0003824;GO:0008033;GO:0010181;GO:0016491;GO:0017150;GO:0050660;GO:0055114	K05541	COG0042
A6B5M1	S-formylglutathione hydrolase OS=Vibrio parahaemolyticus serotype O3:K6 (strain AQ3810) GN=fghA PE=3 SV=1	1	1.693	1.693	0.759582	up	GO:0016787;GO:0018738;GO:0046294;GO:0052689	K01070	COG0627
A6AXT0	Glutamine amidotransferase OS=Vibrio parahaemolyticus serotype O3:K6 (strain AQ3810) GN=A79_0940 PE=4 SV=1	1	1.598	1.598	0.676267	up	GO:0006541;GO:0016740;GO:0016787	K07010	COG2071
A6B5A3	Uncharacterized protein OS=Vibrio parahaemolyticus serotype O3:K6 (strain AQ3810) GN=A79_3250 PE=4 SV=1	1	0.505	0.505	-0.985645	down	-	-	-
A6B263	Putative efflux pump component MtrF OS=Vibrio parahaemolyticus serotype O3:K6 (strain AQ3810) GN=A79_2565 PE=4 SV=1	1	1.534	1.534	0.617298	up	GO:0015558;GO:0016020;GO:0016021;GO:1902604	-	COG2978
A6B394	Putative phage structural protein OS=Vibrio parahaemolyticus serotype O3:K6 (strain AQ3810) GN=A79_0243 PE=4 SV=1	1	0.597	0.597	-0.744197	down	-	-	-
A6AXR1	Uncharacterized protein OS=Vibrio parahaemolyticus serotype O3:K6 (strain AQ3810) GN=A79_0919 PE=4 SV=1	1	1.598	1.598	0.676267	up	GO:0016020;GO:0016021	-	-
A6B843	Uncharacterized protein OS=Vibrio parahaemolyticus serotype O3:K6 (strain AQ3810) GN=A79_4715 PE=4 SV=1	1	0.469	0.469	-1.09234	down	GO:0016020;GO:0016021	-	-
A6B561	Carbon starvation protein OS=Vibrio parahaemolyticus serotype O3:K6 (strain AQ3810) GN=A79_2104 PE=4 SV=1	1	1.53	1.53	0.613532	up	GO:0009267;GO:0016020;GO:0016021	-	COG1966
A6B3M1	Sodium/glutamate symporter OS=Vibrio parahaemolyticus serotype O3:K6 (strain AQ3810) GN=gltS PE=4 SV=1	1	0.457	0.457	-1.12973	down	GO:0015501;GO:0015813;GO:0016020;GO:0016021;GO:0089711	K03312	COG0786
A6B4C7	Uncharacterized protein OS=Vibrio parahaemolyticus serotype O3:K6 (strain AQ3810) GN=A79_3282 PE=4 SV=1	1	4.118	4.118	2.04194	up	-	-	-
A6AXI3	Transcriptional regulator, AraC/XylS family, putative OS=Vibrio parahaemolyticus serotype O3:K6 (strain AQ3810) GN=A79_0621 PE=4 SV=1	1	1.801	1.801	0.848798	up	GO:0003677;GO:0003700;GO:0006351;GO:0006355;GO:0043565	-	COG2207

## Sheet: Supplementary table 4C
id	enrichment	description	ratio_in_study	ratio_in_pop	p_uncorrected	p_bonferroni	type	diff_proteins
GO:0003735	e	structural constituent of ribosome	38/429	39/2626	1.83e-11	2.34e-08	molecular_function	A6B3T6;A6B4B4;A6B4Z7;A6B500;A6B6K0;A6B6X7;A6B6X8;A6B7S7;A6B7V9;A6B8Y6;A6B9B5;A6B9B7;A6B9B8;A6B9H0;A6B9H1;A6B9H2;A6B9H4;A6B9H5;A6B9I4;A6B9I5;A6B9I6;A6B9I7;A6B9I8;A6B9I9;A6B9J0;A6B9M4;A6B9M5;A6B9M6;A6B9M7;A6B9U1;A6BAY4;A6BAY5;A6BAY8;A6BB35;A6BBF2;A6BBH4;A6BBP4;A6BBY6
GO:0005840	e	ribosome	39/429	43/2626	4.9e-11	6.26e-08	cellular_component	A6B3T6;A6B4B4;A6B4Z7;A6B500;A6B6K0;A6B6X7;A6B6X8;A6B7S7;A6B7V9;A6B8A6;A6B8Y6;A6B9B5;A6B9B7;A6B9B8;A6B9H0;A6B9H1;A6B9H2;A6B9H4;A6B9H5;A6B9I4;A6B9I5;A6B9I6;A6B9I7;A6B9I8;A6B9I9;A6B9J0;A6B9M4;A6B9M5;A6B9M6;A6B9M7;A6B9U1;A6BAY4;A6BAY5;A6BAY8;A6BB35;A6BBF2;A6BBH4;A6BBP4;A6BBY6
GO:0043228	e	non-membrane-bounded organelle	42/429	61/2626	4.99e-11	6.37e-08	cellular_component	A6B026;A6B027;A6B3T6;A6B4B4;A6B4W7;A6B4Z7;A6B500;A6B6K0;A6B6X7;A6B6X8;A6B7S7;A6B7V9;A6B8A6;A6B8Y6;A6B9B5;A6B9B7;A6B9B8;A6B9H0;A6B9H1;A6B9H2;A6B9H4;A6B9H5;A6B9I4;A6B9I5;A6B9I6;A6B9I7;A6B9I8;A6B9I9;A6B9J0;A6B9M4;A6B9M5;A6B9M6;A6B9M7;A6B9U1;A6BAY4;A6BAY5;A6BAY8;A6BB35;A6BBF2;A6BBH4;A6BBP4;A6BBY6
GO:0019843	e	rRNA binding	23/429	25/2626	5.36e-11	6.85e-08	molecular_function	A6B3T6;A6B4I9;A6B6X7;A6B8J6;A6B8Y6;A6B9B7;A6B9B8;A6B9H0;A6B9H1;A6B9H2;A6B9H4;A6B9I5;A6B9I6;A6B9I7;A6B9I8;A6B9J0;A6B9M5;A6B9M6;A6B9M7;A6B9U1;A6BBF2;A6BBP4;A6BBY6
GO:0043232	e	intracellular non-membrane-bounded organelle	40/429	49/2626	5.72e-11	7.31e-08	cellular_component	A6B3T6;A6B4B4;A6B4W7;A6B4Z7;A6B500;A6B6K0;A6B6X7;A6B6X8;A6B7S7;A6B7V9;A6B8A6;A6B8Y6;A6B9B5;A6B9B7;A6B9B8;A6B9H0;A6B9H1;A6B9H2;A6B9H4;A6B9H5;A6B9I4;A6B9I5;A6B9I6;A6B9I7;A6B9I8;A6B9I9;A6B9J0;A6B9M4;A6B9M5;A6B9M6;A6B9M7;A6B9U1;A6BAY4;A6BAY5;A6BAY8;A6BB35;A6BBF2;A6BBH4;A6BBP4;A6BBY6
GO:0006412	e	translation	43/429	75/2626	8.29e-11	1.06e-07	biological_process	A6B222;A6B3T6;A6B4B4;A6B4Z7;A6B500;A6B6K0;A6B6X7;A6B6X8;A6B6X9;A6B7S7;A6B7V5;A6B7V8;A6B7V9;A6B8R0;A6B8Y6;A6B9B5;A6B9B7;A6B9B8;A6B9H0;A6B9H1;A6B9H2;A6B9H4;A6B9H5;A6B9I4;A6B9I5;A6B9I6;A6B9I7;A6B9I8;A6B9I9;A6B9J0;A6B9M4;A6B9M5;A6B9M6;A6B9M7;A6B9U1;A6BAY4;A6BAY5;A6BAY8;A6BB35;A6BBF2;A6BBH4;A6BBP4;A6BBY6
GO:0043226	e	organelle	42/429	62/2626	8.78e-11	1.12e-07	cellular_component	A6B026;A6B027;A6B3T6;A6B4B4;A6B4W7;A6B4Z7;A6B500;A6B6K0;A6B6X7;A6B6X8;A6B7S7;A6B7V9;A6B8A6;A6B8Y6;A6B9B5;A6B9B7;A6B9B8;A6B9H0;A6B9H1;A6B9H2;A6B9H4;A6B9H5;A6B9I4;A6B9I5;A6B9I6;A6B9I7;A6B9I8;A6B9I9;A6B9J0;A6B9M4;A6B9M5;A6B9M6;A6B9M7;A6B9U1;A6BAY4;A6BAY5;A6BAY8;A6BB35;A6BBF2;A6BBH4;A6BBP4;A6BBY6
GO:0044444	e	cytoplasmic part	42/429	62/2626	8.78e-11	1.12e-07	cellular_component	A6AYA2;A6B3T6;A6B4B4;A6B4N2;A6B4Z7;A6B500;A6B6K0;A6B6X7;A6B6X8;A6B7L0;A6B7S7;A6B7V9;A6B8A6;A6B8Y6;A6B9B5;A6B9B7;A6B9B8;A6B9H0;A6B9H1;A6B9H2;A6B9H4;A6B9H5;A6B9I4;A6B9I5;A6B9I6;A6B9I7;A6B9I8;A6B9I9;A6B9J0;A6B9M4;A6B9M5;A6B9M6;A6B9M7;A6B9U1;A6BAY4;A6BAY5;A6BAY8;A6BB35;A6BBF2;A6BBH4;A6BBP4;A6BBY6
GO:0030529	e	ribonucleoprotein complex	39/429	44/2626	1.02e-10	1.3e-07	cellular_component	A6B3T6;A6B4B4;A6B4Z7;A6B500;A6B6K0;A6B6X7;A6B6X8;A6B7S7;A6B7V9;A6B8A6;A6B8Y6;A6B9B5;A6B9B7;A6B9B8;A6B9H0;A6B9H1;A6B9H2;A6B9H4;A6B9H5;A6B9I4;A6B9I5;A6B9I6;A6B9I7;A6B9I8;A6B9I9;A6B9J0;A6B9M4;A6B9M5;A6B9M6;A6B9M7;A6B9U1;A6BAY4;A6BAY5;A6BAY8;A6BB35;A6BBF2;A6BBH4;A6BBP4;A6BBY6
GO:0005198	e	structural molecule activity	40/429	44/2626	1.02e-10	1.3e-07	molecular_function	A6B026;A6B027;A6B3T6;A6B4B4;A6B4Z7;A6B500;A6B6K0;A6B6X7;A6B6X8;A6B7S7;A6B7V9;A6B8Y6;A6B9B5;A6B9B7;A6B9B8;A6B9H0;A6B9H1;A6B9H2;A6B9H4;A6B9H5;A6B9I4;A6B9I5;A6B9I6;A6B9I7;A6B9I8;A6B9I9;A6B9J0;A6B9M4;A6B9M5;A6B9M6;A6B9M7;A6B9U1;A6BAY4;A6BAY5;A6BAY8;A6BB35;A6BBF2;A6BBH4;A6BBP4;A6BBY6
GO:0043229	e	intracellular organelle	40/429	50/2626	1.11e-10	1.41e-07	cellular_component	A6B3T6;A6B4B4;A6B4W7;A6B4Z7;A6B500;A6B6K0;A6B6X7;A6B6X8;A6B7S7;A6B7V9;A6B8A6;A6B8Y6;A6B9B5;A6B9B7;A6B9B8;A6B9H0;A6B9H1;A6B9H2;A6B9H4;A6B9H5;A6B9I4;A6B9I5;A6B9I6;A6B9I7;A6B9I8;A6B9I9;A6B9J0;A6B9M4;A6B9M5;A6B9M6;A6B9M7;A6B9U1;A6BAY4;A6BAY5;A6BAY8;A6BB35;A6BBF2;A6BBH4;A6BBP4;A6BBY6
GO:0044267	e	cellular protein metabolic process	56/429	149/2626	1.21e-10	1.55e-07	biological_process	A6AZX3;A6B043;A6B0C1;A6B0V0;A6B120;A6B222;A6B254;A6B2N6;A6B3T6;A6B407;A6B4B4;A6B4J5;A6B4L5;A6B4Z7;A6B500;A6B523;A6B5Q7;A6B6K0;A6B6X7;A6B6X8;A6B6X9;A6B7N1;A6B7S7;A6B7V5;A6B7V8;A6B7V9;A6B8R0;A6B8Y6;A6B9B5;A6B9B7;A6B9B8;A6B9H0;A6B9H1;A6B9H2;A6B9H4;A6B9H5;A6B9I4;A6B9I5;A6B9I6;A6B9I7;A6B9I8;A6B9I9;A6B9J0;A6B9M4;A6B9M5;A6B9M6;A6B9M7;A6B9U1;A6BAY4;A6BAY5;A6BAY8;A6BB35;A6BBF2;A6BBH4;A6BBP4;A6BBY6
GO:0032991	e	macromolecular complex	52/429	130/2626	1.46e-10	1.86e-07	cellular_component	A6AX35;A6AYA2;A6AYX0;A6B3G6;A6B3T6;A6B435;A6B4B4;A6B4E2;A6B4N2;A6B4S8;A6B4Z7;A6B500;A6B610;A6B6K0;A6B6X7;A6B6X8;A6B712;A6B7L0;A6B7S7;A6B7V9;A6B8A6;A6B8B1;A6B8T9;A6B8Y6;A6B9B5;A6B9B7;A6B9B8;A6B9H0;A6B9H1;A6B9H2;A6B9H4;A6B9H5;A6B9I4;A6B9I5;A6B9I6;A6B9I7;A6B9I8;A6B9I9;A6B9J0;A6B9M4;A6B9M5;A6B9M6;A6B9M7;A6B9U1;A6BAY4;A6BAY5;A6BAY8;A6BB35;A6BBF2;A6BBH4;A6BBP4;A6BBY6
GO:0019538	e	protein metabolic process	69/429	230/2626	6.04e-08	7.71e-05	biological_process	A6AZX3;A6B043;A6B081;A6B0C1;A6B0L3;A6B0S5;A6B0V0;A6B0V7;A6B120;A6B222;A6B254;A6B2N6;A6B3J2;A6B3T6;A6B407;A6B4B4;A6B4J5;A6B4L5;A6B4Z7;A6B500;A6B523;A6B5H7;A6B5Q7;A6B6K0;A6B6U0;A6B6U2;A6B6X7;A6B6X8;A6B6X9;A6B7N1;A6B7S7;A6B7V5;A6B7V8;A6B7V9;A6B875;A6B8R0;A6B8Y6;A6B9B5;A6B9B7;A6B9B8;A6B9C5;A6B9H0;A6B9H1;A6B9H2;A6B9H4;A6B9H5;A6B9I4;A6B9I5;A6B9I6;A6B9I7;A6B9I8;A6B9I9;A6B9J0;A6B9K7;A6B9M4;A6B9M5;A6B9M6;…
GO:0042597	e	periplasmic space	19/429	36/2626	4.4e-07	0.000562	cellular_component	A6AWX0;A6AY52;A6AZ90;A6AZU9;A6B043;A6B0L2;A6B0L3;A6B111;A6B1R9;A6B2B9;A6B2R4;A6B2S8;A6B311;A6B5Q7;A6B774;A6B924;A6B9G5;A6BAH2;A6BCI2
GO:0044391	e	ribosomal subunit	8/429	8/2626	4.8e-07	0.000613	cellular_component	A6B7S7;A6B7V9;A6B9B7;A6B9I4;A6B9I5;A6B9I6;A6B9I7;A6BBF2
GO:0044446	e	intracellular organelle part	8/429	11/2626	4.99e-05	0.0638	cellular_component	A6B7S7;A6B7V9;A6B9B7;A6B9I4;A6B9I5;A6B9I6;A6B9I7;A6BBF2
GO:0003723	e	RNA binding	33/429	103/2626	5.62e-05	0.0718	molecular_function	A6B389;A6B3T6;A6B3X2;A6B4I9;A6B6U3;A6B6X7;A6B6X9;A6B769;A6B7V8;A6B7Y9;A6B851;A6B8J6;A6B8Y6;A6B9B7;A6B9B8;A6B9H0;A6B9H1;A6B9H2;A6B9H4;A6B9I4;A6B9I5;A6B9I6;A6B9I7;A6B9I8;A6B9J0;A6B9M4;A6B9M5;A6B9M6;A6B9M7;A6B9U1;A6BBF2;A6BBP4;A6BBY6
GO:0015935	e	small ribosomal subunit	5/429	5/2626	0.000114	0.146	cellular_component	A6B7V9;A6B9B7;A6B9I5;A6B9I7;A6BBF2
GO:0030288	e	outer membrane-bounded periplasmic space	7/429	10/2626	0.000227	0.29	cellular_component	A6AY52;A6AZU9;A6B111;A6B1R9;A6B2R4;A6B2S8;A6B5Q7
GO:0044282	e	small molecule catabolic process	15/429	38/2626	0.000499	0.637	biological_process	A6AWY6;A6AWY7;A6AY99;A6AYA2;A6AYW7;A6AZI2;A6AZX6;A6AZX7;A6B1L8;A6B343;A6B4N2;A6B4R2;A6B5M1;A6B609;A6B610
GO:0019395	e	fatty acid oxidation	5/429	6/2626	0.000592	0.756	biological_process	A6AZX6;A6AZX7;A6B4R2;A6B609;A6B610
GO:0034440	e	lipid oxidation	5/429	6/2626	0.000592	0.756	biological_process	A6AZX6;A6AZX7;A6B4R2;A6B609;A6B610
GO:0006635	e	fatty acid beta-oxidation	5/429	6/2626	0.000592	0.756	biological_process	A6AZX6;A6AZX7;A6B4R2;A6B609;A6B610
GO:0044422	e	organelle part	11/429	24/2626	0.00064	0.817	cellular_component	A6AWU3;A6B026;A6B027;A6B7S7;A6B7V9;A6B9B7;A6B9I4;A6B9I5;A6B9I6;A6B9I7;A6BBF2
GO:0044424	e	intracellular part	91/429	416/2626	0.00142	1	cellular_component	A6AWU3;A6AWY7;A6AY91;A6AYA2;A6AZU0;A6AZX3;A6AZX6;A6AZX7;A6B026;A6B027;A6B0C1;A6B0K6;A6B0K9;A6B168;A6B1F6;A6B254;A6B277;A6B2U5;A6B2W6;A6B3T6;A6B407;A6B4B4;A6B4E2;A6B4F1;A6B4F2;A6B4I9;A6B4K2;A6B4N2;A6B4N8;A6B4P2;A6B4W7;A6B4Z7;A6B500;A6B5S6;A6B5X4;A6B609;A6B6J7;A6B6K0;A6B6U3;A6B6X7;A6B6X8;A6B6X9;A6B712;A6B769;A6B7G3;A6B7L0;A6B7N1;A6B7S7;A6B7V5;A6B7V8;A6B7V9;A6B7Y9;A6B828;A6B849;A6B8A6;A6B8J6;A6B8R0;…
GO:0044248	e	cellular catabolic process	19/429	59/2626	0.00208	1	biological_process	A6AWY6;A6AWY7;A6AY99;A6AYA2;A6AYD5;A6AYW7;A6AZB2;A6AZX6;A6AZX7;A6B1L8;A6B2P1;A6B4N2;A6B4R2;A6B5M1;A6B609;A6B610;A6B769;A6B8J6;A6B8Q3
GO:0030258	e	lipid modification	6/429	10/2626	0.00214	1	biological_process	A6AZX6;A6AZX7;A6B343;A6B4R2;A6B609;A6B610
GO:0016209	e	antioxidant activity	6/429	10/2626	0.00214	1	molecular_function	A6AWY2;A6AYD5;A6B029;A6B482;A6B8K2;A6BAV7
GO:0044712	e	single-organism catabolic process	22/429	73/2626	0.00323	1	biological_process	A6AWY6;A6AWY7;A6AY99;A6AYA2;A6AYD5;A6AYW7;A6AZB2;A6AZI2;A6AZX6;A6AZX7;A6B1L8;A6B2P1;A6B2W6;A6B343;A6B4N2;A6B4R2;A6B5M1;A6B609;A6B610;A6B7G3;A6B9G2;A6BA92
GO:0009062	e	fatty acid catabolic process	5/429	8/2626	0.00415	1	biological_process	A6AZX6;A6AZX7;A6B4R2;A6B609;A6B610
GO:0016042	e	lipid catabolic process	5/429	8/2626	0.00415	1	biological_process	A6AZX6;A6AZX7;A6B4R2;A6B609;A6B610
GO:0044242	e	cellular lipid catabolic process	5/429	8/2626	0.00415	1	biological_process	A6AZX6;A6AZX7;A6B4R2;A6B609;A6B610
GO:0008066	e	glutamate receptor activity	3/429	3/2626	0.00433	1	molecular_function	A6AY84;A6B111;A6B1R9
GO:0035235	e	ionotropic glutamate receptor signaling pathway	3/429	3/2626	0.00433	1	biological_process	A6AY84;A6B111;A6B1R9
GO:0007166	e	cell surface receptor signaling pathway	3/429	3/2626	0.00433	1	biological_process	A6AY84;A6B111;A6B1R9
GO:0007215	e	glutamate receptor signaling pathway	3/429	3/2626	0.00433	1	biological_process	A6AY84;A6B111;A6B1R9
GO:0015276	e	ligand-gated ion channel activity	3/429	3/2626	0.00433	1	molecular_function	A6AY84;A6B111;A6B1R9
GO:0022834	e	ligand-gated channel activity	3/429	3/2626	0.00433	1	molecular_function	A6AY84;A6B111;A6B1R9
GO:0004888	e	transmembrane signaling receptor activity	3/429	3/2626	0.00433	1	molecular_function	A6AY84;A6B111;A6B1R9
GO:0003988	e	acetyl-CoA C-acyltransferase activity	3/429	3/2626	0.00433	1	molecular_function	A6AZX7;A6B0K7;A6B609
GO:0005230	e	extracellular ligand-gated ion channel activity	3/429	3/2626	0.00433	1	molecular_function	A6AY84;A6B111;A6B1R9
GO:0015934	e	large ribosomal subunit	3/429	3/2626	0.00433	1	cellular_component	A6B7S7;A6B9I4;A6B9I6
GO:0004970	e	ionotropic glutamate receptor activity	3/429	3/2626	0.00433	1	molecular_function	A6AY84;A6B111;A6B1R9
GO:0016408	e	C-acyltransferase activity	4/429	6/2626	0.00801	1	molecular_function	A6AWY6;A6AZX7;A6B0K7;A6B609
GO:0046914	e	transition metal ion binding	29/429	112/2626	0.00845	1	molecular_function	A6AWX0;A6AWY7;A6AX58;A6AX68;A6AYQ6;A6B043;A6B081;A6B0L3;A6B1F2;A6B222;A6B2A7;A6B2D5;A6B2F7;A6B2W6;A6B341;A6B3J2;A6B4A1;A6B504;A6B5B0;A6B5X4;A6B6U0;A6B711;A6B712;A6B769;A6B798;A6B9C5;A6B9C7;A6BA92;A6BAI3
GO:0046395	e	carboxylic acid catabolic process	12/429	35/2626	0.00891	1	biological_process	A6AWY6;A6AWY7;A6AY99;A6AYA2;A6AYW7;A6AZX6;A6AZX7;A6B1L8;A6B4N2;A6B4R2;A6B609;A6B610
GO:0016054	e	organic acid catabolic process	12/429	35/2626	0.00891	1	biological_process	A6AWY6;A6AWY7;A6AY99;A6AYA2;A6AYW7;A6AZX6;A6AZX7;A6B1L8;A6B4N2;A6B4R2;A6B609;A6B610
GO:0009056	e	catabolic process	25/429	94/2626	0.00989	1	biological_process	A6AWY6;A6AWY7;A6AY99;A6AYA2;A6AYD5;A6AYW7;A6AZB2;A6AZI2;A6AZX6;A6AZX7;A6B1L8;A6B2P1;A6B2W6;A6B343;A6B4N2;A6B4R2;A6B5M1;A6B609;A6B610;A6B769;A6B7G3;A6B8J6;A6B8Q3;A6B9G2;A6BA92
GO:0009055	e	electron carrier activity	12/429	37/2626	0.0128	1	molecular_function	A6AWX0;A6AYQ6;A6AZ45;A6AZ46;A6B0L3;A6B1F2;A6B4A1;A6B4J3;A6B711;A6B712;A6B9H8;A6BC66
GO:0050790	e	regulation of catalytic activity	5/429	10/2626	0.014	1	biological_process	A6B254;A6B414;A6B5B3;A6B7L3;A6B7Y4
GO:0030151	e	molybdenum ion binding	5/429	10/2626	0.014	1	molecular_function	A6AYQ6;A6B0L3;A6B2A7;A6B2F7;A6B4A1
GO:0065009	e	regulation of molecular function	5/429	10/2626	0.014	1	biological_process	A6B254;A6B414;A6B5B3;A6B7L3;A6B7Y4
GO:0016417	e	S-acyltransferase activity	3/429	4/2626	0.0152	1	molecular_function	A6B4N2;A6BBS4;A6BC48
GO:1902589	e	single-organism organelle organization	3/429	4/2626	0.0152	1	biological_process	A6B4F1;A6B4F2;A6B5K1
GO:0006323	e	DNA packaging	3/429	4/2626	0.0152	1	biological_process	A6B4F1;A6B4F2;A6B5K1
GO:0009068	e	aspartate family amino acid catabolic process	3/429	4/2626	0.0152	1	biological_process	A6AWY6;A6AWY7;A6B4N2
GO:0004181	e	metallocarboxypeptidase activity	3/429	4/2626	0.0152	1	molecular_function	A6B081;A6B3J2;A6B9C5
GO:0030261	e	chromosome condensation	3/429	4/2626	0.0152	1	biological_process	A6B4F1;A6B4F2;A6B5K1
GO:0015267	e	channel activity	4/429	7/2626	0.0163	1	molecular_function	A6AY84;A6B111;A6B1R9;A6B623
GO:0022803	e	passive transmembrane transporter activity	4/429	7/2626	0.0163	1	molecular_function	A6AY84;A6B111;A6B1R9;A6B623
GO:0016860	e	intramolecular oxidoreductase activity	6/429	14/2626	0.0171	1	molecular_function	A6AX68;A6B610;A6B7G3;A6B8Q3;A6B9G2;A6BAR9
GO:1901575	e	organic substance catabolic process	23/429	90/2626	0.0202	1	biological_process	A6AWY6;A6AWY7;A6AY99;A6AYA2;A6AYW7;A6AZB2;A6AZI2;A6AZX6;A6AZX7;A6B1L8;A6B2P1;A6B2W6;A6B343;A6B4N2;A6B4R2;A6B5M1;A6B609;A6B610;A6B769;A6B7G3;A6B8J6;A6B9G2;A6BA92
GO:0004657	e	proline dehydrogenase activity	2/429	2/2626	0.0266	1	molecular_function	A6B970;A6B9M3
GO:1901440	e	poly(hydroxyalkanoate) metabolic process	2/429	2/2626	0.0266	1	biological_process	A6B0K6;A6B0K9
GO:0016419	e	S-malonyltransferase activity	2/429	2/2626	0.0266	1	molecular_function	A6BBS4;A6BC48
GO:0044764	e	multi-organism cellular process	2/429	2/2626	0.0266	1	biological_process	A6B504;A6B5Q7
GO:0004362	e	glutathione-disulfide reductase activity	2/429	2/2626	0.0266	1	molecular_function	A6B8K2;A6BAV7
GO:0009074	e	aromatic amino acid family catabolic process	2/429	2/2626	0.0266	1	biological_process	A6AYW7;A6B1L8
GO:0042619	e	poly-hydroxybutyrate biosynthetic process	2/429	2/2626	0.0266	1	biological_process	A6B0K6;A6B0K9
GO:0042618	e	poly-hydroxybutyrate metabolic process	2/429	2/2626	0.0266	1	biological_process	A6B0K6;A6B0K9
GO:0004314	e	[acyl-carrier-protein] S-malonyltransferase activity	2/429	2/2626	0.0266	1	molecular_function	A6BBS4;A6BC48
GO:0006567	e	threonine catabolic process	2/429	2/2626	0.0266	1	biological_process	A6AWY6;A6AWY7
GO:0046164	e	alcohol catabolic process	2/429	2/2626	0.0266	1	biological_process	A6AZI2;A6B343
GO:0061077	e	chaperone-mediated protein folding	2/429	2/2626	0.0266	1	biological_process	A6B043;A6B5Q7
GO:0004779	e	sulfate adenylyltransferase activity	2/429	2/2626	0.0266	1	molecular_function	A6B2P3;A6B2P4
GO:0004781	e	sulfate adenylyltransferase (ATP) activity	2/429	2/2626	0.0266	1	molecular_function	A6B2P3;A6B2P4
GO:1901441	e	poly(hydroxyalkanoate) biosynthetic process	2/429	2/2626	0.0266	1	biological_process	A6B0K6;A6B0K9
GO:1901616	e	organic hydroxy compound catabolic process	2/429	2/2626	0.0266	1	biological_process	A6AZI2;A6B343
GO:0019518	e	L-threonine catabolic process to glycine	2/429	2/2626	0.0266	1	biological_process	A6AWY6;A6AWY7
GO:0046174	e	polyol catabolic process	2/429	2/2626	0.0266	1	biological_process	A6AZI2;A6B343
GO:0048872	e	homeostasis of number of cells	2/429	2/2626	0.0266	1	biological_process	A6B504;A6B5Q7
GO:0048874	e	homeostasis of number of cells in a free-living population	2/429	2/2626	0.0266	1	biological_process	A6B504;A6B5Q7
GO:0045226	e	extracellular polysaccharide biosynthetic process	2/429	2/2626	0.0266	1	biological_process	A6AX87;A6B0V0
GO:0060589	e	nucleoside-triphosphatase regulator activity	2/429	2/2626	0.0266	1	molecular_function	A6B254;A6B5B3
GO:0003727	e	single-stranded RNA binding	2/429	2/2626	0.0266	1	molecular_function	A6B6U3;A6B851
GO:0015038	e	glutathione disulfide oxidoreductase activity	2/429	2/2626	0.0266	1	molecular_function	A6B8K2;A6BAV7
GO:0046379	e	extracellular polysaccharide metabolic process	2/429	2/2626	0.0266	1	biological_process	A6AX87;A6B0V0
GO:0016420	e	malonyltransferase activity	2/429	2/2626	0.0266	1	molecular_function	A6BBS4;A6BC48
GO:0015037	e	peptide disulfide oxidoreductase activity	2/429	2/2626	0.0266	1	molecular_function	A6B8K2;A6BAV7
GO:0004180	e	carboxypeptidase activity	4/429	8/2626	0.0284	1	molecular_function	A6B081;A6B0V7;A6B3J2;A6B9C5
GO:0006544	e	glycine metabolic process	4/429	8/2626	0.0284	1	biological_process	A6AWY6;A6AWY7;A6AY99;A6AYA2
GO:0044462	e	external encapsulating structure part	12/429	41/2626	0.0321	1	cellular_component	A6AX58;A6AY52;A6AZU9;A6B0M6;A6B111;A6B1R9;A6B2K6;A6B2R4;A6B2S8;A6B5G4;A6B5Q7;A6BAX4
GO:0072329	e	monocarboxylic acid catabolic process	5/429	12/2626	0.0333	1	biological_process	A6AZX6;A6AZX7;A6B4R2;A6B609;A6B610
GO:0015036	e	disulfide oxidoreductase activity	5/429	12/2626	0.0333	1	molecular_function	A6B420;A6B646;A6B8K2;A6BAH2;A6BAV7
GO:0051276	e	chromosome organization	3/429	5/2626	0.0335	1	biological_process	A6B4F1;A6B4F2;A6B5K1
GO:0005216	e	ion channel activity	3/429	5/2626	0.0335	1	molecular_function	A6AY84;A6B111;A6B1R9
GO:0006996	e	organelle organization	3/429	5/2626	0.0335	1	biological_process	A6B4F1;A6B4F2;A6B5K1
GO:0004601	e	peroxidase activity	3/429	5/2626	0.0335	1	molecular_function	A6AYD5;A6B029;A6B482
GO:0022836	e	gated channel activity	3/429	5/2626	0.0335	1	molecular_function	A6AY84;A6B111;A6B1R9
GO:0022838	e	substrate-specific channel activity	3/429	5/2626	0.0335	1	molecular_function	A6AY84;A6B111;A6B1R9
GO:0006566	e	threonine metabolic process	3/429	5/2626	0.0335	1	biological_process	A6AWY6;A6AWY7;A6B4K2
GO:0006457	e	protein folding	8/429	23/2626	0.0403	1	biological_process	A6B043;A6B0C1;A6B254;A6B2N6;A6B407;A6B4J5;A6B5Q7;A6B7N1
GO:0020037	e	heme binding	8/429	23/2626	0.0403	1	molecular_function	A6AWX0;A6AYD5;A6B029;A6B1F2;A6B711;A6B712;A6B9H8;A6BC66
GO:0034645	e	cellular macromolecule biosynthetic process	66/429	324/2626	0.0444	1	biological_process	A6AX47;A6AX87;A6AXI3;A6AY27;A6B083;A6B0V0;A6B168;A6B222;A6B277;A6B2D2;A6B2L4;A6B341;A6B3T6;A6B3U7;A6B3X2;A6B4B4;A6B4F1;A6B4F2;A6B4Z7;A6B500;A6B5L0;A6B6J7;A6B6K0;A6B6X7;A6B6X8;A6B6X9;A6B7S7;A6B7V5;A6B7V8;A6B7V9;A6B7Y4;A6B7Y9;A6B875;A6B883;A6B8C7;A6B8R0;A6B8Y6;A6B9B5;A6B9B6;A6B9B7;A6B9B8;A6B9H0;A6B9H1;A6B9H2;A6B9H4;A6B9H5;A6B9I4;A6B9I5;A6B9I6;A6B9I7;A6B9I8;A6B9I9;A6B9J0;A6B9M4;A6B9M5;A6B9M6;A6B9M7;…
GO:0006979	e	response to oxidative stress	4/429	9/2626	0.0447	1	biological_process	A6AWY2;A6AYD5;A6B3X8;A6B482
GO:0030234	e	enzyme regulator activity	4/429	9/2626	0.0447	1	molecular_function	A6B254;A6B414;A6B5B3;A6B7Y4
GO:0009059	e	macromolecule biosynthetic process	66/429	326/2626	0.0453	1	biological_process	A6AX47;A6AX87;A6AXI3;A6AY27;A6B083;A6B0V0;A6B168;A6B222;A6B277;A6B2D2;A6B2L4;A6B341;A6B3T6;A6B3U7;A6B3X2;A6B4B4;A6B4F1;A6B4F2;A6B4Z7;A6B500;A6B5L0;A6B6J7;A6B6K0;A6B6X7;A6B6X8;A6B6X9;A6B7S7;A6B7V5;A6B7V8;A6B7V9;A6B7Y4;A6B7Y9;A6B875;A6B883;A6B8C7;A6B8R0;A6B8Y6;A6B9B5;A6B9B6;A6B9B7;A6B9B8;A6B9H0;A6B9H1;A6B9H2;A6B9H4;A6B9H5;A6B9I4;A6B9I5;A6B9I6;A6B9I7;A6B9I8;A6B9I9;A6B9J0;A6B9M4;A6B9M5;A6B9M6;A6B9M7;…

## Sheet: Supplementary table 4D
id	enrichment	description	ratio_in_study	ratio_in_pop	p_uncorrected	p_bonferroni	type	diff_proteins
GO:0031455	e	glycine betaine metabolic process	3/61	3/2626	1.19e-05	0.00472	biological_process	A6AZ87;A6AZ88;A6AZ89
GO:0031456	e	glycine betaine biosynthetic process	3/61	3/2626	1.19e-05	0.00472	biological_process	A6AZ87;A6AZ88;A6AZ89
GO:0006577	e	amino-acid betaine metabolic process	3/61	3/2626	1.19e-05	0.00472	biological_process	A6AZ87;A6AZ88;A6AZ89
GO:0006578	e	amino-acid betaine biosynthetic process	3/61	3/2626	1.19e-05	0.00472	biological_process	A6AZ87;A6AZ88;A6AZ89
GO:0042439	e	ethanolamine-containing compound metabolic process	3/61	3/2626	1.19e-05	0.00472	biological_process	A6AZ87;A6AZ88;A6AZ89
GO:0019695	e	choline metabolic process	3/61	3/2626	1.19e-05	0.00472	biological_process	A6AZ87;A6AZ88;A6AZ89
GO:0019285	e	glycine betaine biosynthetic process from choline	3/61	3/2626	1.19e-05	0.00472	biological_process	A6AZ87;A6AZ88;A6AZ89
GO:0072337	e	modified amino acid transport	2/61	2/2626	0.000531	0.21	biological_process	A6AXX9;A6B263
GO:0015871	e	choline transport	2/61	2/2626	0.000531	0.21	biological_process	A6AZ90;A6AZ92
GO:0015849	e	organic acid transport	4/61	19/2626	0.000787	0.311	biological_process	A6AXX9;A6B263;A6B3M1;A6B986
GO:0046942	e	carboxylic acid transport	4/61	19/2626	0.000787	0.311	biological_process	A6AXX9;A6B263;A6B3M1;A6B986
GO:0006066	e	alcohol metabolic process	3/61	9/2626	0.000907	0.358	biological_process	A6AZ87;A6AZ88;A6AZ89
GO:0006820	e	anion transport	5/61	34/2626	0.00095	0.375	biological_process	A6AX35;A6AXX9;A6B263;A6B3M1;A6B986
GO:0015711	e	organic anion transport	4/61	21/2626	0.00117	0.464	biological_process	A6AXX9;A6B263;A6B3M1;A6B986
GO:0006811	e	ion transport	8/61	96/2626	0.00142	0.559	biological_process	A6AX35;A6AXX9;A6AZ90;A6AZ92;A6B263;A6B2J3;A6B3M1;A6B986
GO:0015850	e	organic hydroxy compound transport	2/61	3/2626	0.00157	0.62	biological_process	A6AZ90;A6AZ92
GO:0009308	e	amine metabolic process	3/61	11/2626	0.00172	0.681	biological_process	A6AZ87;A6AZ88;A6AZ89
GO:0006576	e	cellular biogenic amine metabolic process	3/61	11/2626	0.00172	0.681	biological_process	A6AZ87;A6AZ88;A6AZ89
GO:0044106	e	cellular amine metabolic process	3/61	11/2626	0.00172	0.681	biological_process	A6AZ87;A6AZ88;A6AZ89
GO:0008509	e	anion transmembrane transporter activity	4/61	26/2626	0.00269	1	molecular_function	A6AX35;A6B263;A6B3M1;A6B986
GO:0071705	e	nitrogen compound transport	5/61	43/2626	0.0028	1	biological_process	A6AXX9;A6AZ90;A6AZ92;A6B263;A6B3M1
GO:0006865	e	amino acid transport	3/61	13/2626	0.00289	1	biological_process	A6AXX9;A6B263;A6B3M1
GO:0006810	e	transport	15/61	315/2626	0.00474	1	biological_process	A6AX32;A6AX35;A6AXX7;A6AXX9;A6AZ90;A6AZ92;A6B0V5;A6B263;A6B2J3;A6B2S8;A6B3M1;A6B623;A6B6H4;A6B7T6;A6B986
GO:0005342	e	organic acid transmembrane transporter activity	3/61	17/2626	0.00643	1	molecular_function	A6B263;A6B3M1;A6B986
GO:0046943	e	carboxylic acid transmembrane transporter activity	3/61	17/2626	0.00643	1	molecular_function	A6B263;A6B3M1;A6B986
GO:0015075	e	ion transmembrane transporter activity	6/61	75/2626	0.00708	1	molecular_function	A6AX35;A6AZ92;A6B263;A6B2J3;A6B3M1;A6B986
GO:0050660	e	flavin adenine dinucleotide binding	4/61	34/2626	0.00726	1	molecular_function	A6AZ75;A6AZ80;A6AZ89;A6B3F0
GO:0006835	e	dicarboxylic acid transport	2/61	6/2626	0.0075	1	biological_process	A6B263;A6B3M1
GO:0005310	e	dicarboxylic acid transmembrane transporter activity	2/61	6/2626	0.0075	1	molecular_function	A6B263;A6B3M1
GO:0003995	e	acyl-CoA dehydrogenase activity	2/61	6/2626	0.0075	1	molecular_function	A6AZ75;A6AZ80
GO:0008514	e	organic anion transmembrane transporter activity	3/61	18/2626	0.00759	1	molecular_function	A6B263;A6B3M1;A6B986
GO:0098656	e	anion transmembrane transport	3/61	18/2626	0.00759	1	biological_process	A6AX35;A6B263;A6B986
GO:0051234	e	establishment of localization	15/61	320/2626	0.00825	1	biological_process	A6AX32;A6AX35;A6AXX7;A6AXX9;A6AZ90;A6AZ92;A6B0V5;A6B263;A6B2J3;A6B2S8;A6B3M1;A6B623;A6B6H4;A6B7T6;A6B986
GO:0051179	e	localization	15/61	320/2626	0.00825	1	biological_process	A6AX32;A6AX35;A6AXX7;A6AXX9;A6AZ90;A6AZ92;A6B0V5;A6B263;A6B2J3;A6B2S8;A6B3M1;A6B623;A6B6H4;A6B7T6;A6B986
GO:0022857	e	transmembrane transporter activity	8/61	128/2626	0.0085	1	molecular_function	A6AX35;A6AZ92;A6B0V5;A6B263;A6B2J3;A6B3M1;A6B623;A6B986
GO:1901615	e	organic hydroxy compound metabolic process	3/61	20/2626	0.0103	1	biological_process	A6AZ87;A6AZ88;A6AZ89
GO:0005215	e	transporter activity	10/61	190/2626	0.0108	1	molecular_function	A6AX35;A6AXX7;A6AZ90;A6AZ92;A6B0V5;A6B263;A6B2J3;A6B3M1;A6B623;A6B986
GO:0042398	e	cellular modified amino acid biosynthetic process	3/61	21/2626	0.0118	1	biological_process	A6AZ87;A6AZ88;A6AZ89
GO:0016627	e	oxidoreductase activity, acting on the CH-CH group of donors	3/61	24/2626	0.0171	1	molecular_function	A6AZ75;A6AZ80;A6B3F0
GO:0006575	e	cellular modified amino acid metabolic process	3/61	26/2626	0.0212	1	biological_process	A6AZ87;A6AZ88;A6AZ89
GO:0044765	e	single-organism transport	11/61	238/2626	0.0217	1	biological_process	A6AX35;A6AXX9;A6AZ90;A6AZ92;A6B0V5;A6B263;A6B2J3;A6B3M1;A6B623;A6B6H4;A6B986
GO:0008802	e	betaine-aldehyde dehydrogenase activity	1/61	1/2626	0.0232	1	molecular_function	A6AZ88
GO:0008184	e	glycogen phosphorylase activity	1/61	1/2626	0.0232	1	molecular_function	A6B0W6
GO:0004029	e	aldehyde dehydrogenase (NAD) activity	1/61	1/2626	0.0232	1	molecular_function	A6AZ88
GO:0015418	e	quaternary-ammonium-compound-transporting ATPase activity	1/61	1/2626	0.0232	1	molecular_function	A6AZ92
GO:0035673	e	oligopeptide transmembrane transporter activity	1/61	1/2626	0.0232	1	molecular_function	A6B263
GO:0035672	e	oligopeptide transmembrane transport	1/61	1/2626	0.0232	1	biological_process	A6B263
GO:0015558	e	p-aminobenzoyl-glutamate uptake transmembrane transporter activity	1/61	1/2626	0.0232	1	molecular_function	A6B263
GO:0009267	e	cellular response to starvation	1/61	1/2626	0.0232	1	biological_process	A6B561
GO:0008923	e	lysine decarboxylase activity	1/61	1/2626	0.0232	1	molecular_function	A6B9L7
GO:1902604	e	p-aminobenzoyl-glutamate transmembrane transport	1/61	1/2626	0.0232	1	biological_process	A6B263
GO:0015814	e	p-aminobenzoyl-glutamate transport	1/61	1/2626	0.0232	1	biological_process	A6B263
GO:0042594	e	response to starvation	1/61	1/2626	0.0232	1	biological_process	A6B561
GO:0001727	e	lipid kinase activity	1/61	1/2626	0.0232	1	molecular_function	A6AYK7
GO:0033990	e	ectoine synthase activity	1/61	1/2626	0.0232	1	molecular_function	A6AXY5
GO:0046292	e	formaldehyde metabolic process	1/61	1/2626	0.0232	1	biological_process	A6B5M1
GO:0072349	e	modified amino acid transmembrane transporter activity	1/61	1/2626	0.0232	1	molecular_function	A6B263
GO:0050997	e	quaternary ammonium group binding	1/61	1/2626	0.0232	1	molecular_function	A6AZ90
GO:0008812	e	choline dehydrogenase activity	1/61	1/2626	0.0232	1	molecular_function	A6AZ89
GO:0031460	e	glycine betaine transport	1/61	1/2626	0.0232	1	biological_process	A6AXX9
GO:0031669	e	cellular response to nutrient levels	1/61	1/2626	0.0232	1	biological_process	A6B561
GO:0031667	e	response to nutrient levels	1/61	1/2626	0.0232	1	biological_process	A6B561
GO:0055052	e	ATP-binding cassette (ABC) transporter complex, substrate-binding subunit-containing	1/61	1/2626	0.0232	1	cellular_component	A6AZ92
GO:0046294	e	formaldehyde catabolic process	1/61	1/2626	0.0232	1	biological_process	A6B5M1
GO:0015220	e	choline transmembrane transporter activity	1/61	1/2626	0.0232	1	molecular_function	A6AZ92
GO:0046316	e	gluconokinase activity	1/61	1/2626	0.0232	1	molecular_function	A6B987
GO:0042938	e	dipeptide transport	1/61	1/2626	0.0232	1	biological_process	A6B263
GO:0042936	e	dipeptide transporter activity	1/61	1/2626	0.0232	1	molecular_function	A6B263
GO:0015838	e	amino-acid betaine transport	1/61	1/2626	0.0232	1	biological_process	A6AXX9
GO:0035442	e	dipeptide transmembrane transport	1/61	1/2626	0.0232	1	biological_process	A6B263
GO:0015697	e	quaternary ammonium group transport	1/61	1/2626	0.0232	1	biological_process	A6AXX9
GO:0018738	e	S-formylglutathione hydrolase activity	1/61	1/2626	0.0232	1	molecular_function	A6B5M1
GO:0006857	e	oligopeptide transport	1/61	1/2626	0.0232	1	biological_process	A6B263
GO:0003985	e	acetyl-CoA C-acetyltransferase activity	1/61	1/2626	0.0232	1	molecular_function	A6B0K7
GO:0071916	e	dipeptide transmembrane transporter activity	1/61	1/2626	0.0232	1	molecular_function	A6B263
GO:0033265	e	choline binding	1/61	1/2626	0.0232	1	molecular_function	A6AZ90
GO:0042887	e	amide transmembrane transporter activity	1/61	1/2626	0.0232	1	molecular_function	A6B263
GO:0015198	e	oligopeptide transporter activity	1/61	1/2626	0.0232	1	molecular_function	A6B263
GO:0015197	e	peptide transporter activity	1/61	1/2626	0.0232	1	molecular_function	A6B263
GO:0015563	e	uptake transmembrane transporter activity	1/61	1/2626	0.0232	1	molecular_function	A6B263
GO:0043178	e	alcohol binding	1/61	1/2626	0.0232	1	molecular_function	A6AZ90
GO:0015569	e	p-aminobenzoyl-glutamate transmembrane transporter activity	1/61	1/2626	0.0232	1	molecular_function	A6B263
GO:0015171	e	amino acid transmembrane transporter activity	2/61	11/2626	0.0255	1	molecular_function	A6B263;A6B3M1
GO:0022891	e	substrate-specific transmembrane transporter activity	6/61	101/2626	0.0279	1	molecular_function	A6AX35;A6AZ92;A6B263;A6B2J3;A6B3M1;A6B986
GO:0055085	e	transmembrane transport	8/61	159/2626	0.0286	1	biological_process	A6AX35;A6AZ92;A6B0V5;A6B263;A6B2J3;A6B623;A6B6H4;A6B986
GO:0015291	e	secondary active transmembrane transporter activity	3/61	31/2626	0.0338	1	molecular_function	A6AX35;A6B0V5;A6B3M1
GO:0015293	e	symporter activity	2/61	13/2626	0.0351	1	molecular_function	A6B0V5;A6B3M1
GO:0034220	e	ion transmembrane transport	4/61	55/2626	0.0372	1	biological_process	A6AX35;A6B263;A6B2J3;A6B986
GO:0019491	e	ectoine biosynthetic process	1/61	2/2626	0.0459	1	biological_process	A6AXY5
GO:0015172	e	acidic amino acid transmembrane transporter activity	1/61	2/2626	0.0459	1	molecular_function	A6B3M1
GO:0015813	e	L-glutamate transport	1/61	2/2626	0.0459	1	biological_process	A6B3M1
GO:0015501	e	glutamate:sodium symporter activity	1/61	2/2626	0.0459	1	molecular_function	A6B3M1
GO:0015725	e	gluconate transport	1/61	2/2626	0.0459	1	biological_process	A6B986
GO:0005313	e	L-glutamate transmembrane transporter activity	1/61	2/2626	0.0459	1	molecular_function	A6B3M1
GO:0035429	e	gluconate transmembrane transport	1/61	2/2626	0.0459	1	biological_process	A6B986
GO:0002943	e	tRNA dihydrouridine synthesis	1/61	2/2626	0.0459	1	biological_process	A6B3F0
GO:0022829	e	wide pore channel activity	1/61	2/2626	0.0459	1	molecular_function	A6B623
GO:0046185	e	aldehyde catabolic process	1/61	2/2626	0.0459	1	biological_process	A6B5M1
GO:0042873	e	aldonate transport	1/61	2/2626	0.0459	1	biological_process	A6B986
GO:0015800	e	acidic amino acid transport	1/61	2/2626	0.0459	1	biological_process	A6B3M1
GO:0042879	e	aldonate transmembrane transporter activity	1/61	2/2626	0.0459	1	molecular_function	A6B986
GO:0015128	e	gluconate transmembrane transporter activity	1/61	2/2626	0.0459	1	molecular_function	A6B986
GO:0042399	e	ectoine metabolic process	1/61	2/2626	0.0459	1	biological_process	A6AXY5
GO:0015288	e	porin activity	1/61	2/2626	0.0459	1	molecular_function	A6B623
GO:0017150	e	tRNA dihydrouridine synthase activity	1/61	2/2626	0.0459	1	molecular_function	A6B3F0
GO:0015114	e	phosphate ion transmembrane transporter activity	1/61	2/2626	0.0459	1	molecular_function	A6AX35
GO:0004645	e	phosphorylase activity	1/61	2/2626	0.0459	1	molecular_function	A6B0W6
GO:0015415	e	phosphate ion transmembrane-transporting ATPase activity	1/61	2/2626	0.0459	1	molecular_function	A6AX35
GO:0015665	e	alcohol transmembrane transporter activity	1/61	2/2626	0.0459	1	molecular_function	A6AZ92
GO:0015807	e	L-amino acid transport	1/61	2/2626	0.0459	1	biological_process	A6B3M1
GO:0042597	e	periplasmic space	3/61	36/2626	0.0495	1	cellular_component	A6AZ90;A6B2S8;A6BCI2
